# Supplementary material
Source: Elsevier journal article supplement (https://publikationen.ub.uni-frankfurt.de/files/73350/mmc2.xlsx)
Supplement: mmc2 [file mmc2.xlsx]

## Sheet: Legend
Table S2. Kinase screen data.

## Sheet: Screen data
								% inhibition	% inhibition
Name	Target	Pathway	Information	M.w.	CAS Number	Formula	SMILES	10 µM	1 µM
WAY-648936	CDK	Cell Cycle	CDK1, CDK2, and CDK4 inhibitors	238.245	796888-73-8	C13H10N4O	O=C(NC1=CC=CN=C1)C2=N[NH]C3=CC=CC=C23	114.221	99.9209
Anthraquinone-2-carboxylic Acid	IRAK-1	Cancer	Anthraquinone-2-carboxylic acid acts as a potent anti-inflammatory and antinociceptive component in vivo, thus contributing to the immune regulatory role of fruits and herbs.	252.222	117-78-2	C15H8O4	OC(=O)C1=CC=C2C(=O)C3=C(C=CC=C3)C(=O)C2=C1	104.487	79.1031
Amlexanox	Immunology & Inflammation related	Immunology & Inflammation	Amlexanox is an anti-inflammatory antiallergic immunomodulator and also an inhibitor of the protein kinases TBK1 and IKK-ε.	298.29	68302-57-8	C16H14N2O4	CC(C)C1=CC2=C(OC3=NC(=C(C=C3C2=O)C(O)=O)N)C=C1	109.906	106.138
KW-2449	Aurora Kinase,Bcr-Abl,FLT3	Angiogenesis	KW-2449 is a multiple-targeted inhibitor, mostly for Flt3 with IC50 of 6.6 nM, modestly potent to FGFR1, Bcr-Abl and Aurora A little effect on PDGFRβ, IGF-1R, EGFR. Phase 1.	332.4	1000669-72-6	C20H20N4O	O=C(N1CCNCC1)C2=CC=C(C=C2)/C=C/C3=N[NH]C4=C3C=CC=C4	107.182	96.1949
Leflunomide	Dehydrogenase	Metabolism	Leflunomide is a pyrimidine synthesis inhibitor belonging to the DMARD, used as an immunosuppressant agent.	270.21	75706-12-6	C12H9F3N2O2	CC1=C(C=NO1)C(=O)NC2=CC=C(C=C2)C(F)(F)F	109.238	105.502
Resveratrol	Autophagy	Autophagy	Resveratrol has a wide spectrum of targets including cyclooxygenases(i.e. COX, IC50=1.1 μM), lipooxygenases（LOX, IC50=2.7 μM）, kinases, sirtuins and other proteins. It has anti-cancer, anti-inflammatory, blood-sugar-lowering and other beneficial cardiovascular effects.	228.24	501-36-0	C14H12O3	OC1=CC=C(C=C1)\C=C\C2=CC(=CC(=C2)O)O	107.678	88.122
GS-9876 (lanraplenib)	Syk	Angiogenesis	Lanraplenib (GS-9876, GS-SYK) is a potent, highly selective and orally active inhibitor of <b>Spleen Tyrosine Kinase (SYK)</b> with IC50 of 9.5 nM. Lanraplenib inhibits SYK activity in platelets via the <b>glycoprotein VI (GPVI) receptor</b> without prolonging bleeding time (BT) in monkeys or humans.	443.5	1800046-95-0	C23H25N9O_x000D_	NC1=CN=CC(=N1)C2=C[N]3C=CN=C3C(=N2)NC4=CC=C(C=C4)N5CCN(CC5)C6COC6	106.695	79.6645
Nitazoxanide	Others	Others	Nitazoxanide is a synthetic nitrothiazolyl-salicylamide derivative and an antiprotozoal agent. (IC50 for canine influenza virus ranges from 0.17 to 0.21 μM)	307.28	55981-09-4	C12H9N3O5S	CC(=O)OC1=C(C=CC=C1)C(=O)NC2=NC=C(S2)[N+]([O-])=O	109.673	108.238
WAY-324709	ATP-kinase	Others	inhibitor of ATP-kinases	284.242	69785-85-9	C15H9FN2O3	FC1=C(C=CC=C1)C2=NN=C(O2)C3=CC4=C(OCO4)C=C3	101.107	41.4809
Bentamapimod	JNK	MAPK	Bentamapimod (AS602801) is a novel, orally active JNK inhibitor with IC50 values of 80 nM, 90 nM and 230 nM for JNK1, JNK2 and JNK3 respectively.	457.55	848344-36-5	C25H23N5O2S_x000D_	N#CC(C1=NC2=CC=CC=C2S1)C3=NC(=NC=C3)OCC4=CC=C(CN5CCOCC5)C=C4	103.863	14.9423
OSI-930	c-Kit,CSF-1R,VEGFR	Protein Tyrosine Kinase	OSI-930 is a potent inhibitor of Kit, KDR and CSF-1R with IC50 of 80 nM, 9 nM and 15 nM, respectively also potent to Flt-1, c-Raf and Lck and low activity against PDGFRα/β, Flt-3 and Abl. Phase 1.	443.44	728033-96-3	C22H16F3N3O2S	FC(F)(F)OC1=CC=C(NC(=O)C2=C(NCC3=CC=NC4=CC=CC=C34)C=CS2)C=C1	106.739	52.9468
BD750	JAK	JAK/STAT	BD750 is an immunosuppressant and a dual inhibitor of <b>JAK3</b> and <b>STAT5</b> that inhibits IL-2-induced JAK3/STAT5-dependent T cell proliferation with IC50 of 1.5 μM and 1.1 μM for mouse and human T-cell proliferation, respectively.	271.34	892686-59-8	C14H13N3OS_x000D_	OC1=C2CCCCC2=N[N]1C3=NC4=CC=CC=C4S3	106.794	58.1933
WYE-125132 (WYE-132)	mTOR	PI3K/Akt/mTOR	WYE-125132 (WYE-132) is a highly potent, ATP-competitive mTOR inhibitor with IC50 of 0.19 nM highly selective for mTOR versus PI3Ks or PI3K-related kinases hSMG1 and ATR.	519.6	1144068-46-1	C27H33N7O4	CNC(=O)NC1=CC=C(C=C1)C2=NC3=C(C=N[N]3C4CCC5(CC4)OCCO5)C(=N2)N6CC7CCC(C6)O7	92.854	90.8223
Saikosaponin D	ATPase	Transmembrane Transporters	Saikosaponin D, a calcium mobilizing agent (SERCA inhibitor), is a type of Saponin derivative, which is a component extracted from Bupleurum falactum. Saikosaponin D has anti-cancer activities.	780.98	20874-52-6	C42H68O13	CC1OC(OC2CCC3(C)C(CCC4(C)C3C=CC56OCC7(CCC(C)(C)CC57)C(O)CC46C)C2(C)CO)C(O)C(OC8OC(CO)C(O)C(O)C8O)C1O	104.306	52.6446
WAY-347626	CDK2	Cell Cycle	potential CDK2 inhibitor isosteres	309.319	756843-31-9	C17H15N3O3	CC1=CC(=C2N=C(O)C(=N/NC3=CC=C(C=C3)C(O)=O)\C2=C1)C	89.0453	31.7387
SNS-314 Mesylate	Aurora Kinase	Cell Cycle	SNS-314 Mesylate is a potent and selective inhibitor of Aurora A, Aurora B and Aurora C with IC50 of 9 nM, 31 nM, and 3 nM, respectively and less potent to Trk A/B, Flt4, Fms, Axl, c-Raf and DDR2.	527.04	1146618-41-8	C18H15ClN6OS2	ClC1=CC=CC(=C1)NC(=O)NC2=NC=C(CCNC3=NC=NC4=C3SC=C4)S2	53.383	22.1908
KU-0063794	mTOR	PI3K/Akt/mTOR	KU-0063794 is a potent and highly specific dual-mTOR inhibitor of mTORC1 and mTORC2 with IC50 of ~10 nM in cell-free assays no effect on PI3Ks.	465.54	938440-64-3	C25H31N5O4	COC1=C(CO)C=C(C=C1)C2=NC3=NC(=NC(=C3C=C2)N4CCOCC4)N5CC(C)OC(C)C5	102.336	76.4211
AR-A014418	GSK-3	PI3K/Akt/mTOR	AR-A014418 is an ATP-competitive, and selective GSK3β inhibitor with IC50 and Ki of 104 nM and 38 nM in cell-free assays, without significant inhibition on 26 other kinases tested.	308.31	487021-52-3	C12H12N4O4S	COC1=CC=C(CNC(=O)NC2=NC=C(S2)[N+]([O-])=O)C=C1	97.1191	43.6927
OSI-027	mTOR	PI3K/Akt/mTOR	OSI-027 is a selective and potent dual inhibitor of mTORC1 and mTORC2 with IC50 of 22 nM and 65 nM in cell-free assays, and more than 100-fold selectivity observed for mTOR than PI3Kα, PI3Kβ, PI3Kγ or DNA-PK. Phase 1.	406.44	936890-98-1	C21H22N6O3	COC1=CC=CC2=C1[NH]C(=C2)C3=C4[N](N=CN=C4N)C(=N3)C5CCC(CC5)C(O)=O	86.6378	68.3166
Pazopanib	c-Kit,PDGFR,VEGFR	Protein Tyrosine Kinase	Pazopanib is a novel multi-target inhibitor of VEGFR1, VEGFR2, VEGFR3, PDGFR, FGFR, c-Kit and c-Fms with IC50 of 10 nM, 30 nM, 47 nM, 84 nM, 74 nM, 140 nM and 146 nM in cell-free assays, respectively.	437.52	444731-52-6	C21H23N7O2S	C[N]1N=C2C=C(C=CC2=C1C)N(C)C3=NC(=NC=C3)NC4=CC=C(C)C(=C4)[S](N)(=O)=O	103.532	17.7785
Momordin Ic	Others	Others	Molluscicidal activity against Biomphalaria glabrata assessed as minimum concentration required to cause mortality measured after 24 hrs	764.939	96990-18-0	C41H64O13	CC1(C)CCC2(CCC3(C)C(=CCC4C5(C)CCC(OC6OC(C(O)C(OC7OCC(O)C(O)C7O)C6O)C(O)=O)C(C)(C)C5CCC34C)C2C1)C(O)=O	106.925	13.0503
Apigenin	P450 (e.g. CYP17)	Metabolism	Apigenin is a potent P450 inhibitor for CYP2C9 with Ki of 2 μM.	270.24	520-36-5	C15H10O5	OC1=CC=C(C=C1)C2=CC(=O)C3=C(O2)C=C(O)C=C3O	96.8318	39.1148
WAY-358024	GSK-3b	PI3K/Akt/mTOR,Stem Cells , Wnt	GSK-3b inhibitors; GSK-3b inhibitors;	281.266	70169-39-0	C15H11N3O3	OC1=C(C=CC=C1)C(=O)N\N=C2\C(=O)NC3=C2C=CC=C3	96.4374	35.6339
Y16	Rho	Cell Cycle	Y16 is an inhibitor of <b>G-protein-coupled Rho GEFs</b>. It blocks the binding of LARG, a DBL-family Rho guanine nucleotide exchange factor, with Rho (Kd = 80 nM).	384.43	429653-73-6	C24H20N2O3_x000D_	CC1=CC=CC(=C1)COC2=CC=CC(=C2)/C=C/3C(=O)NN(C3=O)C4=CC=CC=C4	101.699	68.5714
Sorafenib Tosylate	PDGFR,Raf,VEGFR	MAPK	Sorafenib Tosylate is a multikinase inhibitor of Raf-1, B-Raf and VEGFR-2 with IC50 of 6 nM, 22 nM and 90 nM in cell-free assays, respectively.	637.03	475207-59-1	C28H24ClF3N4O6S	CNC(=O)C1=CC(=CC=N1)OC2=CC=C(NC(=O)NC3=CC=C(Cl)C(=C3)C(F)(F)F)C=C2.CC4=CC=C(C=C4)[S](O)(=O)=O	98.9872	9.71975
Sorafenib	Raf	MAPK	Sorafenib is a multikinase inhibitor of Raf-1, B-Raf and VEGFR-2 with IC50 of 6 nM, 22 nM and 90 nM in cell-free assays, respectively.	464.82	284461-73-0	C21H16ClF3N4O3	CNC(=O)C1=CC(=CC=N1)OC2=CC=C(NC(=O)NC3=CC=C(Cl)C(=C3)C(F)(F)F)C=C2	83.1979	41.9284
Emodin	Dehydrogenase	Metabolism	Emodin is a purgative resin, 6-methyl-1,3,8-trihydroxyanthraquinone, from rhubarb, the buckthorn and Japanese Knotweed (Fallopia japonica).	270.24	518-82-1	C15H10O5	CC1=CC2=C(C(=C1)O)C(=O)C3=C(C=C(O)C=C3O)C2=O	96.0627	45.5285
Desmethylanethol trithione	Others	Others	Desmethylanethol trithione (ADT-OH) is a derivative of anethole dithiolethione (ADT) and synthetic hydrogen sulfide (H2S) donor.	226.34	18274-81-2	C9H6OS3_x000D_	OC1=CC=C(C=C1)C2=CC(=S)SS2	104.251	93.5087
Torkinib (PP242)	Autophagy,mTOR	PI3K/Akt/mTOR	Torkinib (PP242) is a selective mTOR inhibitor with IC50 of 8 nM in cell-free assays targets both mTOR complexes with >10- and 100-fold selectivity for mTOR than PI3Kδ or PI3Kα/β/γ, respectively.	308.34	1092351-67-1	C16H16N6O	CC(C)[N]1N=C(C2=CC3=C([NH]2)C=CC(=C3)O)C4=C(N)N=CN=C14	83.5874	70.4574
Mubritinib (TAK 165)	HER2	Protein Tyrosine Kinase	Mubritinib (TAK-165) is a potent inhibitor of HER2/ErbB2 with IC50 of 6 nM in BT-474 cell no activity to EGFR, FGFR, PDGFR, JAK1, Src and Blk in BT-474 cell line. Phase 1.	468.47	366017-09-6	C25H23F3N4O2	FC(F)(F)C1=CC=C(\C=C\C2=NC(=CO2)COC3=CC=C(CCCC[N]4C=CN=N4)C=C3)C=C1	80.239	81.7613
Solamargine	P-gp	Neuronal Signaling	Solamargine, a bioactive steroidal alkaloid isolated from Solanum aculeastrum, induces potent, non-selective cytotoxicity and <b>P-gp</b> inhibition.	868.06	20311-51-7	C45H73NO15_x000D_	CC1CCC2(NC1)OC3CC4C5CC=C6CC(CCC6(C)C5CCC4(C)C3C2C)OC7OC(CO)C(OC8OC(C)C(O)C(O)C8O)C(O)C7OC9OC(C)C(O)C(O)C9O	103.061	15.0123
Indoprofen	PDK	PI3K/Akt/mTOR	Indoprofen is a nonsteroidal anti-inflammatory drug (NSAID) and <b>cyclooxygenase (COX)</b> inhibitor. Indoprofen prevents muscle wasting in aged mice through activation of <b>PDK1/AKT pathway</b>.Indoprofen selectively increases <b>SMN2-luciferase reporter protein</b> and <b>endogenous SMN protein</b>.	281.31	31842-01-0	C17H15NO3_x000D_	CC(C(O)=O)C1=CC=C(C=C1)N2CC3=C(C=CC=C3)C2=O	102.757	59.2363
Vistusertib (AZD2014)	mTOR	PI3K/Akt/mTOR	Vistusertib (AZD2014) is a novel mTOR inhibitor with IC50 of 2.8 nM in a cell-free assay highly selective against multiple PI3K isoforms (α/β/γ/δ). AZD2014 showed no or weak binding to the majority of kinases when tested at 1 μM.	462.54	1009298-59-2	C25H30N6O3	CNC(=O)C1=CC=CC(=C1)C2=CC=C3C(=N2)N=C(N=C3N4CCOCC4C)N5CCOCC5C	89.686	76.0615
KN-93 Phosphate	CaMK	Neuronal Signaling	KN-93 Phosphate is a potent and specific inhibitor of Ca2+/calmodulin-dependent protein kinase II (CaMKII) with Ki of 0.37 μM, no remarkable inhibitory effects on APK, PKC, MLCK or Ca2+-PDE activities.	599.03	1188890-41-6	C26H32ClN2O8PS	COC1=CC=C(C=C1)[S](=O)(=O)N(CCO)C2=CC=CC=C2CN(C)C\C=C\C3=CC=C(Cl)C=C3.O[P](O)(O)=O	97.9048	14.6587
Piceatannol	Syk	Angiogenesis	Piceatannol, a natural stilbene, is a selective Syk inhibitor and ~10-fold selectivity versus Lyn.	244.24	10083-24-6	C14H12O4	OC1=CC(=CC(=C1)/C=C/C2=CC=C(O)C(=C2)O)O	98.9574	7.09552
PFK15	Autophagy	Autophagy	PFK15 is a potent and selective 6-phosphofructo-2-kinase (PFKFB3) inhibitor with IC50 of 207 nM.	260.29	4382-63-2	C17H12N2O	O=C(\C=C\C1=CC=C2C=CC=CC2=N1)C3=CC=NC=C3	94.3212	14.8835
KN-92 phosphate	Others	Others	KN-92 is an inactive derivative of KN-93, the selective inhibitor of Ca2+/calmodulin-dependent kinase type II (CaMKII).	554.98	1135280-28-2	C24H28ClN2O7PS_x000D_	COC1=CC=C(C=C1)[S](=O)(=O)NC2=CC=CC=C2CN(C)C\C=C\C3=CC=C(Cl)C=C3.O[P](O)(O)=O	98.5906	24.3806
IMD 0354	IκB/IKK	NF-κB	IMD-0354 is an IKKβ inhibitor and blocks IκBα phosphorylation in NF-κB pathway.	383.67	978-62-1	C15H8ClF6NO2	OC1=C(C=C(Cl)C=C1)C(=O)NC2=CC(=CC(=C2)C(F)(F)F)C(F)(F)F	83.0737	80.0834
WYE-354	mTOR	PI3K/Akt/mTOR	WYE-354 is a potent, specific and ATP-competitive inhibitor of mTOR with IC50 of 5 nM, blocks mTORC1/P-S6K(T389) and mTORC2/P-AKT(S473) not P-AKT(T308), selective for mTOR than PI3Kα (>100-fold) and PI3Kγ (>500-fold).	495.53	1062169-56-5	C24H29N7O5	COC(=O)NC1=CC=C(C=C1)C2=NC3=C(C=N[N]3C4CCN(CC4)C(=O)OC)C(=N2)N5CCOCC5	90.4978	63.3635
NVP 231	Others	Others	NVP 231 is a novel CerK inhibitor that inhibits the catalytic activity of recombinant CerK in vitro with an IC50 of 12 nM.	431.55	362003-83-6	C25H25N3O2S_x000D_	O=C(NC1=NC2=C(S1)C=C(NC(=O)[C]34C[CH]5C[CH]([CH2]C([CH2]5)C3)C4)C=C2)C6=CC=CC=C6	100.058	49.3156
GDC-0349	mTOR	PI3K/Akt/mTOR	GDC-0349 is a potent and selective ATP-competitive inhibitor of mTOR with Ki of 3.8 nM, 790-fold inhibitory effect against PI3Kα and other 266 kinases. Phase 1.	452.55	1207360-89-1	C24H32N6O3	CCNC(=O)NC1=CC=C(C=C1)C2=NC(=C3CCN(CC3=N2)C4COC4)N5CCOCC5C	93.8448	63.996
BLU-554 (BLU554)	FGFR	Angiogenesis	BLU-554 is a potent, highly-selective, oral FGFR4 inhibitor with an IC50 value of 5 nM. The IC50s for FGFR1-3 is 624-2203 nM.	503.38	1707289-21-1	C24H24Cl2N4O4	COC1=CC(=C(Cl)C(=C1Cl)C2=CC3=C(C=C2)N=C(NC4COCCC4NC(=O)C=C)N=C3)OC	29.0093	3.19572
NH125	CaMK	Neuronal Signaling	NH125 is a selective eEF-2 kinase inhibitor with IC50 of 60 nM, >125-fold selectivity over PKC, PKA, and CaMKII, and also a potent histidine kinase inhibitor.	524.56	278603-08-0	C27H45IN2	[I-].CCCCCCCCCCCCCCCC[N+]1=C(C)[N](CC2=CC=CC=C2)C=C1	78.7474	74.3589
SC-43	phosphatase	Metabolism	SC-43, a sorafenib derivative, is an agonist of Src-homology protein tyrosine phosphatase-1 (SHP-1/PTPN6) and reduces liver fibrosis. SC-43 reduces p-STAT3 and induces apoptosis with anti-tumor activity.	431.8	1400989-25-4	C21H13ClF3N3O2_x000D_	FC(F)(F)C1=CC(=CC=C1Cl)NC(=O)NC2=CC=CC(=C2)OC3=CC=C(C=C3)C#N	90.7641	82.6254
Torin 1	Autophagy,mTOR	PI3K/Akt/mTOR	Torin 1 is a potent inhibitor of mTORC1/2 with IC50 of 2 nM/10 nM in cell-free assays exhibits 1000-fold selectivity for mTOR than PI3K.	607.62	1222998-36-8	C35H28F3N5O2	CCC(=O)N1CCN(CC1)C2=CC=C(C=C2C(F)(F)F)N3C(=O)C=CC4=C3C5=CC(=CC=C5N=C4)C6=CC7=CC=CC=C7N=C6	88.82	64.2407
AG-1024	IGF-1R	Protein Tyrosine Kinase	AG-1024 (Tyrphostin) inhibits IGF-1R autophosphorylation with IC50 of 7 μM, is less potent to IR with IC50 of 57 μM and specifically distinguishes between InsR and IGF-1R (as compared to other tyrphostins).	305.17	65678-07-1	C14H13BrN2O	CC(C)(C)C1=C(O)C(=CC(=C1)C=C(C#N)C#N)Br	81.4667	24.3506
CC-223	mTOR	PI3K/Akt/mTOR	CC-223 is a potent, selective, and orally bioavailable mTOR inhibitor with IC50 of 16 nM, >200-fold selectivity over the related PI3K-α. Phase 1/2.	397.47	1228013-30-6	C21H27N5O3	COC1CCC(CC1)N2C(=O)CNC3=NC=C(N=C23)C4=CN=C(C=C4)C(C)(C)O	99.6929	57.3007
GSK583	NF-κB	NF-κB	GSK583 is a highly potent and selective inhibitor of RIP2 kinase with an IC50 of 5 nM.	398.45	1346547-00-9	C20H19FN4O2S	CC(C)(C)[S](=O)(=O)C1=CC=C2N=CC=C(NC3=N[NH]C4=C3C=C(F)C=C4)C2=C1	45.6815	15.7654
GSK2656157	PERK	Apoptosis	GSK2656157 is an ATP-competitive and highly selective inhibitor of PERK with IC50 of 0.9 nM in a cell-free assay, 500-fold greater against a panel of 300 kinases.	416.45	1337532-29-2	C23H21FN6O	C[N]1C=C(C2=C(F)C3=C(C=C2)N(CC3)C(=O)CC4=CC=CC(=N4)C)C5=C(N)N=CN=C15	93.3579	49.0253
SKLB4771 (FLT3-IN-1)	FLT3	Angiogenesis	SKLB4771 is a potent and selective inhibitor of human receptor-type tyrosine-protein kinase <b>FLT3</b> with IC50 of 10 nM.	537.66	1370256-78-2	C25H27N7O3S2_x000D_	CC1=CC=C(NC(=O)NC2=NN=C(S2)SC3=C4C=CC(=CC4=NC=N3)OCCCN5CCOCC5)C=C1	83.0187	21.9859
Sapanisertib (INK 128, MLN0128)	mTOR	PI3K/Akt/mTOR	Sapanisertib (INK 128, MLN0128) is a potent and selective mTOR inhibitor with IC50 of 1 nM in cell-free assays >200-fold less potent to class I PI3K isoforms, superior in blocking mTORC1/2 and sensitive to pro-invasion genes (vs Rapamycin). Phase 1.	309.33	1224844-38-5	C15H15N7O	CC(C)[N]1N=C(C2=CC3=C(OC(=N3)N)C=C2)C4=C(N)N=CN=C14	72.1288	85.8919
AZD8055	mTOR	PI3K/Akt/mTOR	AZD8055 is a novel ATP-competitive mTOR inhibitor with IC50 of 0.8 nM in MDA-MB-468 cells with excellent selectivity (?1,000-fold) against PI3K isoforms and ATM/DNA-PK. Phase 1.	465.54	1009298-09-2	C25H31N5O4	COC1=C(CO)C=C(C=C1)C2=NC3=C(C=C2)C(=NC(=N3)N4CCOCC4C)N5CCOCC5C	93.8002	96.5655
Anisomycin	JNK	MAPK	Anisomycin is an antibiotic, which inhibits protein synthesis, and also act as a JNK activator.	265.3	22862-76-6	C14H19NO4	COC1=CC=C(CC2NCC(O)C2OC(C)=O)C=C1	91.8508	97.9071
Cobimetinib (GDC-0973, RG7420)	MEK	MAPK	Cobimetinib (GDC-0973, RG7420) is a potent and highly selective MEK1 inhibitor with IC50 of 4.2 nM, showing more than 100-fold selectively for MEK1 over MEK2 and showed no significant inhibition when tested against a panel of more than 100 of serine-threonine and tyrosine kinases. Phase 3.	531.31	934660-93-2	C21H21F3IN3O2	OC1(CN(C1)C(=O)C2=C(NC3=CC=C(I)C=C3F)C(=C(F)C=C2)F)C4CCCCN4	33.5145	-8.2146
Belizatinib (TSR-011)	ALK,Trk receptor	Protein Tyrosine Kinase	Belizatinib (TSR-011) is a potent inhibitor of ALK (IC50=0.7 nM) and tropomyosin receptor kinase (TRK) (IC50 values less than 3 nM for TRK A, B, and C).	577.73	1357920-84-3	C33H44FN5O3	CC(C)NC(=O)C1CCC(CC1)N2C(NC3=CC=C(CN4CCC(CC4)C(C)(C)O)C=C23)=NC(=O)C5=CC=C(F)C=C5	9.03765	3.3922
SU5408	VEGFR	Protein Tyrosine Kinase	SU5408 is a potent and selective inhibitor of <b>VEGFR2 Kinase</b> with IC50 of 70 nM.	310.35	15966-93-5	C18H18N2O3_x000D_ _x000D_	CCOC(=O)C1=C(C)[NH]C(=C1C)\C=C2/C(=O)NC3=C2C=CC=C3	100.827	45.4787
R547	CDK	Cell Cycle	R547 is a potent ATP-competitive inhibitor of CDK1/2/4 with Ki of 2 nM/3 nM/1 nM. It is less potent to CDK7 and GSK3α/β, while inactive to other kinases. Phase 1.	441.45	741713-40-6	C18H21F2N5O4S	COC1=CC=C(F)C(=C1C(=O)C2=C(N)N=C(NC3CCN(CC3)[S](C)(=O)=O)N=C2)F	88.6341	51.3032
Buparlisib (BKM120, NVP-BKM120)	PI3K	PI3K/Akt/mTOR	Buparlisib (BKM120, NVP-BKM120) is a selective PI3K inhibitor of p110α/β/δ/γ with IC50 of 52 nM/166 nM/116 nM/262 nM in cell-free assays, respectively. Reduced potency against VPS34, mTOR, DNAPK, with little activity to PI4Kβ. Phase 2.	410.39	944396-07-0	C18H21F3N6O2	NC1=CC(=C(C=N1)C2=NC(=NC(=C2)N3CCOCC3)N4CCOCC4)C(F)(F)F	77.9317	27.2132
Regorafenib Monohydrate	VEGFR,PDGFR,c-Kit,c-RET,Raf	Protein Tyrosine Kinase	Regorafenib is a novel oral multikinase inhibitor with IC50 values of 13, 4.2, 46, 22, 7, 1.5, 2.5, 28, 19 nM for VEGFR1, murine VEGFR2, murine VEGFR3, PDGFR-β, KIT, RET, RAF-1, B-RAF and B-RAF(V600E) respectively.	500.83	1019206-88-2	C21H17ClF4N4O4	O.CNC(=O)C1=NC=CC(=C1)OC2=CC=C(NC(=O)NC3=CC=C(Cl)C(=C3)C(F)(F)F)C(=C2)F	79.407	18.3734
Regorafenib (BAY 73-4506)	c-RET,VEGFR	Protein Tyrosine Kinase	Regorafenib (BAY 73-4506) is a multi-target inhibitor for VEGFR1, VEGFR2, VEGFR3, PDGFRβ, Kit, RET and Raf-1 with IC50 of 13 nM/4.2 nM/46 nM, 22 nM, 7 nM, 1.5 nM and 2.5 nM in cell-free assays, respectively.	482.82	755037-03-7	C21H15ClF4N4O3	CNC(=O)C1=CC(=CC=N1)OC2=CC(=C(NC(=O)NC3=CC=C(Cl)C(=C3)C(F)(F)F)C=C2)F	100.116	37.9842
Polyphyllin I	Others	anti-angiogenic	Polyphyllin D has anti-angiogenic effect . Polyphyllin D has toxicity in human RBCs as well as its underlying mechanism for the hemolysis and eryptosis/erythroptosis. Polyphyllin D has strong anticancer activity, can overcome drug resistance in R-HepG2 cells and elicit programmed cell death via mitochondrial dysfunction. Polyphyllin D induces apoptosis via the mitochondrial apoptotic pathway as e…	855.017	50773-41-6	C44H70O16	CC1CCC2(OC1)OC3CC4C5CC=C6CC(CCC6(C)C5CCC4(C)C3C2C)OC7OC(CO)C(OC8OC(CO)C(O)C8O)C(O)C7OC9OC(C)C(O)C(O)C9O	71.2842	21.5326
WAY-635109	B-Raf	MAPK	inhibitors of B-Raf kinase	271.294	781622-25-1	C13H9N3O2S	C1OC2=C(O1)C=C(NC3=C4C=CSC4=NC=N3)C=C2	94.752	22.7738
MRT67307 HCl	IκB/IKK	NF-κB	MRT67307 is a potent and dual IKK? and TBK1 inhibitor with IC50 of 160 and 19 nM, respectively.	464.6	1190378-57-4 (free-base)	C26H36N6O2R	O=C(NCCCNC1=NC(=NC=C1C2CC2)NC3=CC(=CC=C3)CN4CCOCC4)C5CCC5	39.4795	15.8699
7,8-Dihydroxyflavone	Trk receptor	Protein Tyrosine Kinase	7,8-Dihydroxyflavone acts as a potent and selective small-molecule agonist of the TrkB receptor (Kd ≈ 320 nM), the main signaling receptor of brain-derived neurotrophic factor (BDNF).	254.24	38183-03-8	C15H10O4	OC1=CC=C2C(=O)C=C(OC2=C1O)C3=CC=CC=C3	13.5411	-1.2729
Hypocrellin A	PKC	TGF-beta/Smad	Hypocrellin A (HA) is a perylenequinone isolated from <i>Shiraia bambusicola</i> that shows antiviral, antimicrobial and anticancer activity through mediating multiple signaling pathways. Hypocrellin A also is a selective and potent inhibitor of PKC.	546.52	77029-83-5	C30H26O10_x000D_	COC1=CC(=C2C(=O)C(=C3CC(C)(O)C(C(C)=O)C4=C(OC)C(=O)C5=C(O)C=C(OC)C6=C1C2=C3C4=C56)OC)O	88.2795	76.9654
SNS-314	Aurora Kinase	Cell Cycle	SNS-314 is a potent and selective inhibitor of Aurora A, Aurora B and Aurora C with IC50 of 9 nM, 31 nM, and 3 nM, respectively. It is less potent to Trk A/B, Flt4, Fms, Axl, c-Raf and DDR2. Phase 1.	430.93	1057249-41-8	C19H19ClN6O4S3	C[S](O)(=O)=O.ClC1=CC=CC(=C1)NC(=O)NC2=NC=C(CCNC3=NC=NC4=C3SC=C4)S2	92.7867	-5.71329
Sanguinarine chloride	phosphatase	Others	Sanguinarine, a plant alkaloid, is a potent and specific protein phosphatase (PP) 2C inhibitor.	367.78	5578-73-4	C20H14ClNO4	[Cl-].C[N+]1=CC2=C3OCOC3=CC=C2C4=CC=C5C=C6OCOC6=CC5=C14	74.6195	13.9861
PQR620	mTOR	PI3K/Akt/mTOR	PQR620 is a novel, selective, orally bioavailable and brain penetrant dual <b>TORC1/2</b> inhibitor. PQR620 has anti-tumor activity across 56 lymphoma models with a median IC50 of 250 nM after 72 h of exposure.	445.47	1927857-56-4	C21H25F2N7O2_x000D_	NC1=NC=C(C2=NC(=NC(=N2)N3C4CCC3COC4)N5C6CCC5COC6)C(=C1)C(F)F	91.5625	88.8585
Kobe2602	Rho	Cell Cycle	Kobe2602 is a selective Ras inhibitor that blocks H-Ras GTP binding to c-Raf-1 (Ki = 149 µM).	419.31	454453-49-7	C14H9F4N5O4S_x000D_	[O-][N+](=O)C1=CC(=CC(=C1NNC(=S)NC2=CC=C(F)C=C2)[N+]([O-])=O)C(F)(F)F	91.9684	26.3278
WAY-625530	FGFR1	Protein Tyrosine Kinase	Fibroblast Growth Factor Receptor 1 Kinase Inhibitors	412.841	956782-57-3	C22H18ClFN2O3	COC1=CC2=C(C=C1)C=C(C=C2)C3(C)NC(=O)N(CC4=C(Cl)C=C(F)C=C4)C3=O	7.86082	24.0628
4'-Methoxyresveratrol	Others	Others	4-Methoxyresveratrol is a stibenoid found in the Chinese herb Gnetum cleistostachyum.	242.27	33626-08-3	C15H14O3	COC1=CC=C(C=C1)\C=C\C2=CC(=CC(=C2)O)O	98.6332	61.1583
Flavopiridol (Alvocidib)	CDK	Cell Cycle	Flavopiridol (Alvocidib) competes with ATP to inhibit CDKs including CDK1, CDK2, CDK4, CDK6, and CDK9 with IC50 values in the 20-100 nM range. It is more selective for CDK1, 2, 4, 6, 9 versus CDK7. Flavopiridol is initially found to inhibit EGFR and PKA. Phase 1/2.	401.84	146426-40-6	C21H20ClNO5	CN1CCC(C(O)C1)C2=C3OC(=CC(=O)C3=C(O)C=C2O)C4=C(Cl)C=CC=C4	85.8567	83.8043
Lanatoside C	ATPase	Transmembrane Transporters	Lanatoside C, a cardiac glycoside which belongs to a class of compounds derived from plants called foxglove, possesses the ability to inhibit the interchange of Na+ and K+ across cell membrane and is widely used to treat anti-arrhythmias and heart failure.	985.12	17575-22-3	C49H76O20	CC1OC(CC(O)C1OC2CC(O)C(OC3CC(OC(C)=O)C(OC4OC(CO)C(O)C(O)C4O)C(C)O3)C(C)O2)OC5CCC6(C)C(CCC7C6CC(O)C8(C)C(CCC78O)C9=CC(=O)OC9)C5	84.7187	83.5698
MAZ51	VEGFR. Akt. GSK-3. Rho. apoptosis related	Protein Tyrosine Kinase & Angiogenesis	MAZ51 is a potent and selective inhibitor of <b>vascular endothelial growth factor receptor (VEGFR)-3 (Flt-4) tyrosine kinase</b>. MAZ51 induces cell rounding and G2/M cell cycle arrest in glioma cells through phosphorylation of <b>Akt/GSK3β</b> and activation of <b>RhoA</b>. MAZ51 inhibits the proliferation and induces the <b>apoptosis</b> of a variety of non-VEGFR-3-expressing tumor cell lines.	314.38	163655-37-6	C21H18N2O_x000D_	CN(C)C1=CC=C(\C=C/2C(=O)NC3=CC=CC=C23)C4=CC=CC=C14	99.6504	31.9261
DASA-58	PKM	Metabolism	DASA-58 is a specific and potent Pyruvate kinase M2 (PKM2) activator.	453.53	1203494-49-8	C19H23N3O6S2	NC1=CC(=CC=C1)[S](=O)(=O)N2CCCN(CC2)[S](=O)(=O)C3=CC4=C(OCCO4)C=C3	27.3671	10.6124
Selonsertib (GS-4997)	ASK	Apoptosis	GS-4997 is a highly selective and potent once-daily oral ASK1 inhibitor with potential anti-inflammatory, antineoplastic and anti-fibrotic activities.	445.49	1448428-04-3	C24H24FN7O	CC(C)[N]1C=NN=C1C2=CC=CC(=N2)NC(=O)C3=CC(=C(C)C=C3F)[N]4C=NC(=C4)C5CC5	76.9668	3.28677
Mulberroside A	Others	Interleukin Related,TNF Receptor	Mulberroside A, the major active anti-tyrosinase compound in the root bark extract of Morus alba L.	568.524	102841-42-9	C26H32O14	OCC1OC(OC2=CC=C(/C=C/C3=CC(=CC(=C3)O)OC4OC(CO)C(O)C(O)C4O)C(=C2)O)C(O)C(O)C1O	80.0045	49.5886
(+)-Usniacin	Others	Others	(+)-Usniacin is a naturally occurring dibenzofuran derivative found in several lichen species.	344.32	7562-61-0	C18H16O7	CC(=O)C1=C(O)C(=C(O)C2=C1OC3=CC(=O)C(=C(O)C23C)C(C)=O)C	93.6533	13.9861
GSK269962A HCl	ROCK	Cell Cycle	GSK269962 is a selective ROCK(Rho-associated protein kinase) inhibitor with IC50 values of 1.6 and 4 nM for ROCK1 and ROCK2, respectively.	607.06	850664-21-0(free base)	C29H31ClN8O5	Cl.CC[N]1C2=C(C=NC(=C2)OC3=CC(=CC=C3)NC(=O)C4=CC=C(OCCN5CCOCC5)C=C4)N=C1C6=NON=C6N	77.2567	44.3817
ASP4132	AMPK	PI3K/Akt/mTOR	ASP4132 is a potent and orally active activator of <b>Adenosine Monophosphate-Activated Protein Kinase (AMPK)</b> with EC50 of 0.018 μM. ASP4132 is used as a clinical candidate for the treatment of human cancer.	937.06	1640294-30-9	C46H51F3N6O8S2_x000D_	COC1=NC=C(CN2CCC(CC2)C3=CC=C4[NH]C(=NC4=C3)C(=O)N5CCN(CC5)CC6=CC=C(C=C6)C(F)(F)F)C=C1.CC7=CC=C(C=C7)[S](O)(=O)=O.CC8=CC=C(C=C8)[S](O)(=O)=O	69.383	82.6989
Reversine	Adenosine Receptor,Aurora Kinase	GPCR & G Protein	Reversine is a potent human A3 adenosine receptor antagonist with Ki of 0.66 μM, and a pan-aurora A/B/C kinase inhibitor with IC50 of 12 nM/13 nM/20 nM, respectively. Also used for stem cell dedifferentiation.	393.23	656820-32-5	C21H27N7O	C1CCC(CC1)NC2=C3N=C[NH]C3=NC(=N2)NC4=CC=C(C=C4)N5CCOCC5	73.3421	64.1312
Tyrphostin 9	PDGFR,EGFR	Protein Tyrosine Kinase	Tyrphostin 9 is firstly designed as an EGFR inhibitor with IC50 of 460 μM, but is also found to be more potent to PDGFR with IC50 of 0.5 μM.	282.38	10537-47-0	C18H22N2O	CC(C)(C)C1=CC(=CC(=C1O)C(C)(C)C)C=C(C#N)C#N	74.571	87.7658
XL388	mTOR	PI3K/Akt/mTOR	XL388 is a highly potent, selective, ATP-competitive inhibitor of mTOR with IC50 of 9.9 nM, 1000-fold selectivity over the closely related PI3K kinases.	455.5	1251156-08-7	C23H22FN3O4S	CC1=C(F)C(=CC=C1C(=O)N2CCOC3=CC=C(C=C3C2)C4=CN=C(N)C=C4)[S](C)(=O)=O	83.9869	-8.71284
Flavopiridol HCl	CDK	Cell Cycle	Flavopiridol HCl competes with ATP to inhibit CDKs including CDK1, CDK2, CDK4 and CDK6 with IC50 of ~ 40 nM in cell-free assays. It is 7.5-fold more selective for CDK1/2/4/6 than CDK7. Flavopiridol is initially found to inhibit EGFR and PKA. Phase 1/2.	438.3	131740-09-5	C21H21Cl2NO5	Cl.CN1CCC(C(O)C1)C2=C3OC(=CC(=O)C3=C(O)C=C2O)C4=C(Cl)C=CC=C4	84.3341	71.0921
BAY 1895344	ATM/ATR	PI3K/Akt/mTOR	Elimusertib (BAY-1895344) is a very potent and highly selective <b>ATR (ataxia telangiectasia and Rad3-related)</b> inhibitor with IC50 of 7 nM. Elimusertib potently inhibits proliferation of a broad spectrum of human tumor cell lines with median IC50 of 78 nM.	375.43	1876467-74-1	C20H21N7O_x000D_	CC1COCCN1C2=CC(=C3C=CN=C(C4=CC=N[NH]4)C3=N2)C5=CC=N[N]5C	78.7391	46.7988
Aurora Kinase Inhibitor III	Aurora Kinase	Cell Cycle	Aurora kinase inhibitor III is a potent inhibitor of <b>Aurora A kinase</b> with an IC50 of 42 nM and has high selectivity for Aurora A over BMX, BTK, IGF-1R, c-Src, TRKB, SYK, and EGFR (IC50s = 386, 3,550, 591, 1,980, 2,510, 887, and >10,000 nM, respectively).	413.4	879127-16-9	C21H18F3N5O_x000D_	FC(F)(F)C1=CC(=CC=C1)NC2=CC=NC(=N2)NC3=CC(=CC=C3)NC(=O)C4CC4	80.8636	29.5632
TBB	Casein Kinase	Metabolism	TBB (4,5,6,7-tetrabromobenzotriazole) is a selective cell-permeable CK2 inhibitor with IC50 values of 0.9 and 1.6 μM for rat liver and human recombinant CK2 respectively.	434.708	17374-26-4	C6HBr4N3	BrC1=C(Br)C2=C(N=N[NH]2)C(=C1Br)Br	82.9152	27.7386
Indirubin	GSK-3	PI3K/Akt/mTOR	Indirubin is a potent cyclin-dependent kinases and GSK-3β inhibitor with IC50 of about 5 μM and 0.6 μM.	262.26	479-41-4	C16H10N2O2	O=C1NC2=CC=CC=C2\C1=C3/NC4=C(C=CC=C4)C3=O	84.2671	38.1476
PF-4708671	S6 Kinase	PI3K/Akt/mTOR	PF-4708671 is a cell-permeable inhibitor of p70 ribosomal S6 kinase (S6K1 isoform) with Ki/IC50 of 20 nM/160 nM in cell-free assays, 400-fold greater selectivity for S6K1 than S6K2, and 4- and >20-fold selectivity for S6K1 than MSK1 and RSK1/2, respectively. First S6K1-specific inhibitor to be reported.	390.41	1255517-76-0	C19H21F3N6	CCC1=CN=CN=C1N2CCN(CC2)CC3=NC4=C([NH]3)C=CC(=C4)C(F)(F)F	98.3943	18.7434
WAY-278534	Pim-1,Pim-2	kinase, JAK/STAT & Epigenetics	inhibitor of Pim-1 and/or Pim-2 protein kinase; activity against ascorbic acid; PPAR agonist; in vivo anti-inflammatory and analgesic as well as in-vitro antioxidant activities;	235.259	6320-51-0	C11H9NO3S	COC1=CC=C(C=C1)\C=C\2SC(=O)NC2=O	91.8864	26.2406
Masitinib (AB1010)	c-Kit,PDGFR	Protein Tyrosine Kinase	Masitinib is a novel inhibitor for Kit and PDGFRα/β with IC50 of 200 nM and 540 nM/800 nM, weak inhibition to ABL and c-Fms. Phase 3.	498.64	790299-79-5	C28H30N6OS	CN1CCN(CC1)CC2=CC=C(C=C2)C(=O)NC3=CC(=C(C)C=C3)NC4=NC(=CS4)C5=CC=CN=C5	90.0252	9.08895
Dicoumarol	Others	Others	Dicoumarol is a competitive NADPH quinone oxidoreductase (NQO1) inhibitor,and used as an anticoagulant by interfering with the metabolism of vitamin K.	336.29	66-76-2	C19H12O6	OC1=C(CC2=C(O)C3=C(OC2=O)C=CC=C3)C(=O)OC4=CC=CC=C14	67.9288	5.99814
Bisindolylmaleimide IV	CMV	Microbiology	Bisindolylmaleimide IV (Arcyriarubin A, BIM IV, Compound 5/1a) is a potent inhibitor of protein kinase C (PKC) with IC50 of 0.55 μM. Bisindolylmaleimide IV also inhibits PKA with IC50 of 11.8μM. Bisindolylmaleimide IV is a potent, selective inhibitor of human cytomegalovirus (HCMV) replication in cell culture with IC50 of 0.2 μM.	327.34	119139-23-0	C20H13N3O2_x000D_	O=C1NC(=O)C(=C1C2=C[NH]C3=CC=CC=C23)C4=C[NH]C5=CC=CC=C45	95.3412	11.8294
SU11274	c-Met	Protein Tyrosine Kinase	SU11274 is a selective Met inhibitor with IC50 of 10 nM in cell-free assays, no effects on PGDFRβ, EGFR or Tie2.	568.09	658084-23-2	C28H30ClN5O4S	CN1CCN(CC1)C(=O)C2=C(C)[NH]C(=C2C)/C=C/3C(=O)NC4=C3C=C(C=C4)[S](=O)(=O)N(C)C5=CC(=CC=C5)Cl	90.0566	-6.59996
BI-847325	MEK,Aurora Kinase	MAPK	BI-847325 is an orally bioavailable, and selective dual MEK/Aurora kinase inhibitor with IC50 of 3 nM, 25 nM, 15 nM, 25 nM, and 4 nM for Xenopus laevis Aurora B, human Aurora A and Aurora C, as well as human MEK1 and MEK2, respectively. Phase 1.	464.56	1207293-36-4	C29H28N4O2	CCNC(=O)C#CC1=CC=C\2C(=C1)NC(=O)C2=C(NC3=CC=C(CN(C)C)C=C3)/C4=CC=CC=C4	-4.34386	-1.93818
BI-78D3	JNK	MAPK	BI-78D3 is a competitive JNK inhibitor with IC50 of 280 nM that displays > 100 fold selectivity over p38α and no activity at mTOR and PI-3K.	379.37	883065-90-5	C13H9N5O5S2	OC1=NN=C(SC2=NC=C(S2)[N+]([O-])=O)[N]1C3=CC=C4OCCOC4=C3	7.90694	-6.08894
Amuvatinib (MP-470)	c-Kit,FLT3,PDGFR	Protein Tyrosine Kinase	Amuvatinib (MP-470) is a potent and multi-targeted inhibitor of c-Kit, PDGFRα and Flt3 with IC50 of 10 nM, 40 nM and 81 nM, respectively. Phase 2.	447.51	850879-09-3	C23H21N5O3S	S=C(NCC1=CC=C2OCOC2=C1)N3CCN(CC3)C4=NC=NC5=C4OC6=CC=CC=C56	83.1107	94.3703
Usnic acid	Others	Others	Usnic acid is a furandione found uniquely in lichen that is used widely in cosmetics, deodorants, toothpaste and medicinal creams as well as some herbal products. It exhibits antiviral, antiprotozoal, antiproliferative, anti-inflammatory and analgesic activity.	344.32	125-46-2	C18H16O7	CC(=O)C1C(=O)C=C2OC3=C(C(=C(C)C(=C3C(C)=O)O)O)C2(C)C1=O	56.8004	-1.93248
CCG-1423	Rho	Cell Cycle	CCG-1423 is a specific RhoA pathway inhibitor, which inhibits SRF-mediated transcription.	454.75	285986-88-1	C18H13ClF6N2O3	CC(ONC(=O)C1=CC(=CC(=C1)C(F)(F)F)C(F)(F)F)C(=O)NC2=CC=C(Cl)C=C2	80.2713	10.6976
KN-93	CaMK	Neuronal Signaling	KN-93 is a cell-permeable, reversible and competitive inhibitor of <b>Ca2+/calmodulin-dependent protein kinase II (CaMK-II)</b> with Ki of 2.58 μM at rabbit myocardial CaM kinase activity.	501.04	139298-40-1	C26H29ClN2O4S_x000D_	COC1=CC=C(C=C1)[S](=O)(=O)N(CCO)C2=CC=CC=C2CN(C)C\C=C\C3=CC=C(Cl)C=C3	80.0997	22.8556
Tyrphostin AG 879	HER2	Protein Tyrosine Kinase	Tyrphostin AG 879 potently inhibits HER2/ErbB2 with IC50 of 1 μM, 100- and 500-fold higher selective to ErbB2 than PDGFR and EGFR.	316.46	148741-30-4	C18H24N2OS	CC(C)(C)C1=C(O)C(=CC(=C1)/C=C(C#N)/C(N)=S)C(C)(C)C	92.7911	15.5668
EB-3D	Choline kinase. AMPK. Apoptosis related	Cell Cycle	EB-3D is a potent and selective inhibitor of <b>choline kinase α (ChoKα)</b> with IC50 of 1 μM for ChoKα1. EB-3D induces deregulation of the <b>AMPK-mTOR</b> pathway and <b>apoptosis</b> in leukemia T-cells.	644.44	1839150-63-8	C30H36Br2N4O2_x000D_	[Br-].[Br-].CN(C)C1=CC=[N+](CC2=CC=C(OCCOC3=CC=C(C[N+]4=CC=C(C=C4)N(C)C)C=C3)C=C2)C=C1	75.3102	15.3005
Lonafarnib	Transferase	Metabolism	Lonafarnib is an orally bioavailable FPTase inhibitor for H-ras, K-ras-4B and N-ras with IC50 of 1.9 nM, 5.2 nM and 2.8 nM in cell-free assays, respectively. Phase 3.	638.82	193275-84-2	C27H31Br2ClN4O2	NC(=O)N1CCC(CC1)CC(=O)N2CCC(CC2)C3C4=C(CCC5=C3C(=CC(=C5)Cl)Br)C=C(Br)C=N4	91.4417	11.266
Cinobufagin	ATM/ATR	Cell Cycle	Cinobufagin (Cinobufagine), an active ingredient of Venenum Bufonis, inhibits tumor development. Cinobufagin increases ATM and Chk2 and decreases CDC25C, CDK1, and cyclin B. Cinobufagin inhibits PI3K, AKT and Bcl-2 while increases levels of cleaved caspase-9 and caspase-3. Thus, Cinobufagin induces cell cycle arrest at the G2/M phase and apoptosis.	442.54	470-37-1	C26H34O6_x000D_	CC(=O)OC1C2OC23C4CCC5CC(O)CCC5(C)C4CCC3(C)C1C6=COC(=O)C=C6	91.2754	88.6108
Tomatine	Anti-infection	Microbiology	Tomatine is a natural glycoalkaloid with fungicidal, antimicrobial, and insecticidal properties.	1034.19	17406-45-0	C50H83NO21_x000D_	CC1CCC2(NC1)OC3CC4C5CCC6CC(CCC6(C)C5CCC4(C)C3C2C)OC7OC(CO)C(OC8OC(CO)C(O)C(OC9OCC(O)C(O)C9O)C8OC%10OC(CO)C(O)C(O)C%10O)C(O)C7O	99.7584	18.0198
AZ20	ATM/ATR	PI3K/Akt/mTOR	AZ20 is a novel potent and selective inhibitor of ATR kinase with IC50 of 5 nM in a cell-free assay, 8-fold selectivity over mTOR.	412.51	1233339-22-4	C21H24N4O3S	CC1COCCN1C2=NC(=NC(=C2)C3(CC3)[S](C)(=O)=O)C4=CC=CC5=C4C=C[NH]5	76.8243	37.021
PLX5622	CSF-1R	Protein Tyrosine Kinase	PLX5622 is a highly selective <b>CSF-1R</b> inhibitor (IC50 < 10 nmol/L), showing > 20-fold selectivity over KIT and FLT3.	395.41	1303420-67-8	C21H19F2N5O_x000D_	COC1=C(CNC2=NC(=C(CC3=C[NH]C4=NC=C(C)C=C34)C=C2)F)C=C(F)C=N1	96.7366	13.5251
WAY-647729	CDK	Cell Cycle	CDK9 Inhibitors	293.343	852678-17-2	C16H11N3OS	OC1=C2C=CC=C(NC3=C4C=CSC4=NC=N3)C2=CC=C1	77.3748	40.6863
BL-918	ULK	Autophagy	BL-918 is a potent, orally active activator of UNC-51-like kinase 1 (ULK1) with EC50 of 24.14 nM and Kd of 0.719 μM. BL-918 induces cytoprotective autophagy for Parkinson's disease treatment.	533.44	2101517-69-3	C23H15F8N3OS_x000D_	FC1=CC(=C(NC(=O)C(NC(=S)NC2=CC(=CC(=C2)C(F)(F)F)C(F)(F)F)C3=CC=CC=C3)C=C1)F	76.2489	-4.55956
Bisindolylmaleimide IX (Ro 31-8220 Mesylate)	PKC	TGF-beta/Smad	Bisindolylmaleimide IX (Ro 31-8220 Mesylate) is a pan-PKC inhibitor with IC50 of 5 nM, 24 nM, 14 nM, 27 nM, and 24 nM for PKC-α, PKC-βI, PKC-βII, PKC-γ, and PKC-ε, respectively, and also shows potent inhibition against MAPKAP-K1b, MSK1, GSK3β and S6K1.	553.65	138489-18-6	C26H27N5O5S2	C[N]1C=C(C2=CC=CC=C12)C3=C(C(=O)NC3=O)C4=C[N](CCCSC(N)=N)C5=CC=CC=C45.C[S](O)(=O)=O	81.8514	36.1055
Pazopanib HCl (GW786034 HCl)	c-Kit,PDGFR,VEGFR	Protein Tyrosine Kinase	Pazopanib HCl (GW786034 HCl) is a novel multi-target inhibitor of VEGFR1, VEGFR2, VEGFR3, PDGFR, FGFR, c-Kit and c-Fms with IC50 of 10 nM, 30 nM, 47 nM, 84 nM, 74 nM, 140 nM and 146 nM in cell-free assays, respectively.	473.98	635702-64-6	C21H24ClN7O2S	Cl.C[N]1N=C2C=C(C=CC2=C1C)N(C)C3=NC(=NC=C3)NC4=CC=C(C)C(=C4)[S](N)(=O)=O	96.4971	13.3956
WNK-IN-11	Serine/threonin kinase	Apoptosis	WNK-IN-11 is a potent, selective, and orally acitve allosteric inhibitor of <b>With-No-Lysine (WNK)</b> kinase with IC50 of 4 nM for WNK1 enzyme.	462.4	2123489-30-3	C21H21Cl2N5OS	CNC1=NC(=CS1)C2=NC=C(Cl)C(=C2)C(=O)N3CCN(CC3)CC4=CC=C(Cl)C=C4	93.5957	17.9711
VX-803 (M4344)	ATM/ATR	PI3K/Akt/mTOR	VX-803 (M4344) is an ATP-competitive, orally active, and selective inhibitor of ataxia telangiectasia and Rad3 related (ATR) kinase with Ki of < 150 pM. VX-803 (M4344) potently inhibits ATR-driven phosphorylated checkpoint kinase-1 (P-Chk1) phosphorylation with IC50 of 8 nM. VX-803 (M4344) exhibits potential antineoplastic activity.	541.55	1613191-99-3	C25H29F2N9O3_x000D_	NC1=N[N]2C=C(F)C=NC2=C1C(=O)NC3=C(N4CCC(CC4)C(=O)N5CCN(CC5)C6COC6)C(=CN=C3)F	82.9583	38.2404
BAY 1895344 (BAY-1895344)	ATM/ATR	DNA Damage	BAY 1895344 is a potent, highly selective and orally available ATR inhibitor with an IC50 of 7 nM.	411.89	1876467-74-1(free base)	C20H22ClN7O	Cl.CC1COCCN1C2=CC(=C3C=CN=C(C4=CC=N[NH]4)C3=N2)C5=CC=N[N]5C	81.9724	46.1921
ASP3026	ALK	Protein Tyrosine Kinase	ASP3026 is a novel and selective inhibitor for ALK with IC50 of 3.5 nM. Phase 1.	580.74	1097917-15-1	C29H40N8O3S	COC1=CC(=CC=C1NC2=NC(=NC=N2)NC3=CC=CC=C3[S](=O)(=O)C(C)C)N4CCC(CC4)N5CCN(C)CC5	10.7005	0.382654
GDC-0575 (ARRY-575, RG7741)	Chk	Cell Cycle	GDC-0575 (ARRY-575, RG7741) is a potent and selective <b>CHK1</b> inhibitor with an IC50 of 1.2 nM.	378.27	1196541-47-5	C16H20BrN5O	NC1CCCN(C1)C2=C(Br)C=NC3=C2C(=C[NH]3)NC(=O)C4CC4	26.9137	11.6274
AS-252424	PI3K	PI3K/Akt/mTOR	AS-252424 is a novel, potent PI3Kγ inhibitor with IC50 of 30 nM in a cell-free assay with 30-fold selectivity for PI3Kγ than PI3Kα, and low inhibitory activity towards PI3Kδ/β.	305.28	900515-16-4	C14H8FNO4S	OC1=C(C=CC(=C1)F)C2=CC=C(O2)\C=C3/SC(=O)NC3=O	83.4552	25.2484
PD98059	MEK	MAPK	PD98059 is a non-ATP competitive MEK inhibitor with IC50 of 2 μM in a cell-free assay, specifically inhibits MEK-1-mediated activation of MAPK does not directly inhibit ERK1 or ERK2.	267.28	167869-21-8	C16H13NO3	COC1=C(N)C(=CC=C1)C2=CC(=O)C3=CC=CC=C3O2	85.2784	7.60949
SMI-16a	Pim	Epigenetics	SMI-16a is a selective Pim kinase inhibitor with IC50 values of 150 nM and 20 nM for Pim1 and Pim2 respectively.	263.31	587852-28-6	C13H13NO3S_x000D_	CCCOC1=CC=C(C=C1)\C=C2\SC(=O)NC2=O	90.4852	56.0905
Voxtalisib (XL765, SAR245409)	mTOR,PI3K	Angiogenesis	Voxtalisib (SAR245409, XL765) is a dual inhibitor of mTOR/PI3K, mostly for p110γ with IC50 of 9 nM also inhibits DNA-PK and mTOR. Phase 1/2.	270.29	934493-76-2	C13H14N6O	CCN1C(=O)C(=CC2=C(C)N=C(N)N=C12)C3=CC=N[NH]3	69.8496	35.8212
VS-5584 (SB2343)	PI3K	PI3K/Akt/mTOR	VS-5584 (SB2343) is a potent and selective dual PI3K/mTOR inhibitor for mTOR, PI3Kα/β/δ/γ with IC50 of 3.4 nM and 2.6-21 nM, respectively. Phase 1.	354.41	1246560-33-7	C17H22N8O	CC(C)[N]1C(=NC2=C1N=C(N=C2C3=CN=C(N)N=C3)N4CCOCC4)C	79.2821	84.2294
Axitinib	c-Kit,PDGFR,VEGFR	Protein Tyrosine Kinase	Axitinib is a multi-target inhibitor of VEGFR1, VEGFR2, VEGFR3, PDGFRβ and c-Kit with IC50 of 0.1 nM, 0.2 nM, 0.1-0.3 nM, 1.6 nM and 1.7 nM in Porcine aorta endothelial cells, respectively.	386.47	319460-85-0	C22H18N4OS	CNC(=O)C1=CC=CC=C1SC2=CC3=C(C=C2)C(=N[NH]3)\C=C\C4=CC=CC=N4	94.8281	46.5341
Ripretinib (DCC-2618)	c-Kit	Protein Tyrosine Kinase	DCC-2618 is an orally bioavailable switch pocket control inhibitor of wild-type and mutated forms of the tumor-associated antigens (TAA) mast/stem cell factor receptor (SCFR) <b>KIT</b> and <b>PDGFR-alpha</b>, with IC50 values of 4 nM, 8 nM, 18 nM, 5 nM and 14 nM for WT KIT, V654A KIT, T670I KIT, D816H KIT and D816V KIT, respectively.	510.36	1442472-39-0	C24H21BrFN5O2	CCN1C(=O)C(=CC2=C1C=C(NC)N=C2)C3=C(Br)C=C(F)C(=C3)NC(=O)NC4=CC=CC=C4	83.3189	55.581
WAY-321582-A	casein kinase 2	autophagy,Metabolism	autophagy inducer; autophagy inhibitors (modulator?); casein kinase 2 inhibitor; fungicides, insecticides, and miticides;	225.246	34116-16-0	C13H11N3O	C(NC1=NC=NC2=C1C=CC=C2)C3=CC=CO3	89.3542	41.6879
PH-797804	p38 MAPK	MAPK	PH-797804 is a novel pyridinone inhibitor of p38α with IC50 of 26 nM in a cell-free assay 4-fold more selective versus p38β and does not inhibit JNK2. Phase 2.	477.3	586379-66-0	C22H19BrF2N2O3	CNC(=O)C1=CC(=C(C)C=C1)N2C(=CC(=C(Br)C2=O)OCC3=CC=C(F)C=C3F)C	70.4351	40.0317
WAY-336715	CDK8	Cell Cycle	novel CDK8 inhibitor	376.475	451458-32-5	C21H20N4OS	CCC1=CC=C(C=C1)N2C(=O)C3=C([NH]N=C3)N=C2SCC4=C(C)C=CC=C4	19.99	51.6394
Dinaciclib (SCH727965)	CDK	Cell Cycle	Dinaciclib (SCH727965) is a novel and potent CDK inhibitor for CDK2, CDK5, CDK1 and CDK9 with IC50 of 1 nM, 1 nM, 3 nM and 4 nM in cell-free assays, respectively. It also blocks thymidine (dThd) DNA incorporation. Phase 3.	396.49	779353-01-4	C21H28N6O2	CCC1=C2N=C(C=C(NCC3=CC=C[N+](=C3)[O-])[N]2N=C1)N4CCCCC4CCO	78.4545	74.9697
PF-04691502	Akt,mTOR,PI3K	PI3K/Akt/mTOR	PF-04691502 is an ATP-competitive PI3K(α/β/δ/γ)/mTOR dual inhibitor with Ki of 1.8 nM/2.1 nM/1.6 nM/1.9 nM and 16 nM in cell-free assays, little activity against either Vps34, AKT, PDK1, p70S6K, MEK, ERK, p38, or JNK. Phase 2.	425.48	1013101-36-4	C22H27N5O4	COC1=CC=C(C=N1)C2=CC3=C(C)N=C(N)N=C3N(C4CCC(CC4)OCCO)C2=O	90.4751	76.5601
BMS-794833	c-Met,VEGFR	Protein Tyrosine Kinase	BMS-794833 is a potent ATP competitive inhibitor of Met/VEGFR2 with IC50 of 1.7 nM/15 nM, also inhibits Ron, Axl and Flt3 with IC50 of <3 nM a prodrug of BMS-817378. Phase 1.	468.84	1174046-72-0	C23H15ClF2N4O3	NC1=NC=CC(=C1Cl)OC2=CC=C(NC(=O)C3=CNC=C(C3=O)C4=CC=C(F)C=C4)C=C2F	79.3936	25.3745
PHT-427	Akt,PDK	PI3K/Akt/mTOR	PHT-427 is a dual Akt and PDPK1 inhibitor (high affinity binding for the PH domains of Akt and PDPK1) with Ki of 2.7 μM and 5.2 μM, respectively.	409.61	1191951-57-1	C20H31N3O2S2	CCCCCCCCCCCCC1=CC=C(C=C1)[S](=O)(=O)NC2=NN=CS2	25.6142	11.0668
Donafenib (Sorafenib D3)	Raf	MAPK	Sorafenib D3 (Bay 43-9006 D3) is the deuterium labeled Sorafenib. Sorafenib is a multikinase inhibitor IC50s of 6 nM, 15 nM, 20 nM and 22 nM for Raf-1, mVEGFR-2, mVEGFR-3 and B-RAF, respectively.	467.84	1130115-44-4	C21H13D3ClF3N4O3_x000D_	C(NC(=O)C1=NC=CC(=C1)OC2=CC=C(NC(=O)NC3=CC=C(Cl)C(=C3)C(F)(F)F)C=C2)([2H])([2H])[2H]	88.5299	10.687
NG25	TGF-beta/Smad	TGF-beta/Smad	NG25 is a novel inhibitor of <b>TAK1</b> with enzymatic IC50s of 149 and 21.7 nM for TAK1 and MAP4K2 respectively.	537.58	1315355-93-1	C29H30F3N5O2_x000D_	CCN1CCN(CC1)CC2=CC=C(NC(=O)C3=CC=C(C)C(=C3)OC4=C5C=C[NH]C5=NC=C4)C=C2C(F)(F)F	78.3244	6.3757
Cerdulatinib (PRT062070, PRT2070)	JAK	JAK/STAT	Cerdulatinib (PRT-062070) is an oral active, multi-targeted tyrosine kinase inhibitor with IC50 of 12 nM/6 nM/8 nM/0.5 nM and 32 nM for JAK1/JAK2/JAK3/TYK2 and Syk, respectively. Also inhibits 19 other tested kinases with IC50 less than 200 nM.	482	1369761-01-2	C20H28ClN7O3S	Cl.CC[S](=O)(=O)N1CCN(CC1)C2=CC=C(NC3=NC(=C(C=N3)C(N)=O)NC4CC4)C=C2	83.0899	79.7973
SNS-032 (BMS-387032)	CDK	Cell Cycle	SNS-032 (BMS-387032) has firstly been described as a selective inhibitor of CDK2 with IC50 of 48 nM in cell-free assays and is 10- and 20-fold selective over CDK1/CDK4. It is also found to be sensitive to CDK7/9 with IC50 of 62 nM/4 nM, with little effect on CDK6. Phase 1.	380.53	345627-80-7	C17H24N4O2S2	CC(C)(C)C1=CN=C(CSC2=CN=C(NC(=O)C3CCNCC3)S2)O1	84.15	71.3202
INH14	NF-κB	NF-κB	INH14 is an inhibitor of TLR2-mediated <b>NF-kB</b> activation with IC50 values of 8.975 μM and 3.598 μM for IKKα and IKKβ, respectively.	240.3	200134-22-1	C15H16N2O_x000D_	CCC1=CC=C(NC(=O)NC2=CC=CC=C2)C=C1	104.848	35.6112
Telatinib	c-Kit,PDGFR,VEGFR	Protein Tyrosine Kinase	Telatinib is a potent inhibitor of VEGFR2/3, c-Kit and PDGFRα with IC50 of 6 nM/4 nM, 1 nM and 15 nM, respectively. Phase 2.	409.83	332012-40-5	C20H16ClN5O3	CNC(=O)C1=NC=CC(=C1)COC2=NN=C(NC3=CC=C(Cl)C=C3)C4=C2OC=C4	65.4172	14.5379
WAY-301398	arylamine Nacetyltransferase,Protein Kinase C	,Cell Cycle	inhibitors of arylamine Nacetyltransferase	288.27	312607-68-4	C16H13FO4	COC1=CC(=C(O)C=C1)C(=O)CC(=O)C2=CC=C(F)C=C2	86.9738	68.0142
WAY-278535	Pim-1,Pim-2,PPAR	kinase, JAK/STAT & Epigenetics, Metabolism	inhibitor of Pim-1 and/or Pim-2 protein kinase; antibacterial and antifungal activities; PPAR agonist; inhibit RING domain ubiquitin ligases;	239.678	24138-83-8	C10H6ClNO2S	ClC1=CC=C(C=C1)\C=C\2SC(=O)NC2=O	74.649	14.8934
ODM-203	FGFR	Angiogenesis	ODM-203 is a selective inhibitor of <b>FGFR</b> and <b>VEGFR</b> with ic50s of 11 nM,16 nM,6 nM, 35 nM,26 nM,9 nM,5 nM for recombinant FGFR1, FGFR2, FGFR3,FGFR4, VEGFR1, VEGFR2 and VEGFR3, respectively.	505.54	1430723-35-5	C26H21F2N5O2S_x000D_	C[N]1C=C(C=N1)C2=CC3=C(C=C2)[N](C=N3)C4=CC(=CC(=C4)N[S](=O)(=O)C5CC5)C6=C(F)C=C(F)C=C6	8.4348	5.58235
Hypericin	MAO	Metabolism	Hypericin (Hyp, HY) is a naturally occurring substance found in the common St. John's Wort (Hypericum species) with antidepressive, antineoplastic and antiviral (human immunodeficiency and hepatitis C virus) activities. Hypericin has inhibitory effects on MAO (monoaminoxidase), PKC (protein kinase C), dopamine-beta-hydroxylase, reverse transcriptase, telomerase and CYP (cytochrome P450).	504.44	548-04-9	C30H16O8_x000D_	CC1=C2C3=C(C)C=C(O)C4=C3C5=C6C2=C(C(=C1)O)C(=O)C7=C6C(=C(O)C=C7O)C8=C(O)C=C(O)C(=C58)C4=O	43.9723	-7.61749
ZSTK474	PI3K	PI3K/Akt/mTOR	ZSTK474 inhibits class I PI3K isoforms with IC50 of 37 nM in a cell-free assay, mostly PI3Kδ. Phase1/2.	417.41	475110-96-4	C19H21F2N7O2	FC(F)C1=NC2=C(C=CC=C2)[N]1C3=NC(=NC(=N3)N4CCOCC4)N5CCOCC5	74.5464	8.11869
Torin 2	ATM/ATR,mTOR	PI3K/Akt/mTOR	Torin 2 is a potent and selective mTOR inhibitor with IC50 of 0.25 nM in p53?/? MEFs cell line 800-fold greater selectivity for mTOR than PI3K and improved pharmacokinetic properties. Inhibition of ATM/ATR/DNA-PK with EC50 of 28 nM/35 nM/118 nM,in PC3 cell lines respectively.	432.4	1223001-51-1	C24H15F3N4O	NC1=CC=C(C=N1)C2=CC=C3N=CC4=C(N(C(=O)C=C4)C5=CC=CC(=C5)C(F)(F)F)C3=C2	74.0663	61.3277
Rafoxanide	Anti-infection	Microbiology	Rafoxanide is a salicylanilide used as an anthelmintic, being effective treatment for the control of fluke infections in animals.	626.01	22662-39-1	C19H11Cl2I2NO3	OC1=C(I)C=C(I)C=C1C(=O)NC2=CC(=C(OC3=CC=C(Cl)C=C3)C=C2)Cl	73.912	16.2126
SKLB 610	VEGFR	Protein Tyrosine Kinase	SKLB-610 is a multi-target inhibitor of the <b>tyrosine kinases</b>. It is most potent against <b>VEGFR2</b> and exhibits slightly weaker inhibitor of <b>FGFR2 and PDGFR</b>.	415.37	1125780-41-7	C21H16F3N3O3_x000D_	CNC(=O)C1=NC=CC(=C1)OC2=CC=C(NC(=O)C3=CC=CC(=C3)C(F)(F)F)C=C2	75.6547	25.8208
Orantinib (TSU-68, SU6668)	PDGFR	Protein Tyrosine Kinase	Orantinib (TSU-68, SU6668) has greatest potency against PDGFR autophosphorylation with Ki of 8 nM in a cell-free assay, but also strongly inhibits Flk-1 and FGFR1 trans-phosphorylation, little activity against IGF-1R, Met, Src, Lck, Zap70, Abl and CDK2 does not inhibit EGFR. Phase 3.	310.35	252916-29-3	C18H18N2O3	CC1=C(CCC(O)=O)C(=C([NH]1)/C=C/2C(=O)NC3=CC=CC=C23)C	92.6838	47.6009
AZD7545	Others	Others	AZD7545 is a potent PDHK inhibitor with IC50 of 36.8 nM and 6.4 nM for PDHK1 and PDHK2, respectively. It failed to inhibit PDHK4 at higher concentrations(>10 nM), AZD7545 stimulates PDHK4 activity.	478.87	252017-04-2	C19H18ClF3N2O5S	CN(C)C(=O)C1=CC=C(C=C1)[S](=O)(=O)C2=CC(=C(NC(=O)C(C)(O)C(F)(F)F)C=C2)Cl	85.7651	15.915
SU5204	VEGFR. HER2	Protein Tyrosine Kinase & Angiogenesis	SU5204 is a tyrosine kinase inhibitor with IC50 of 4 μM and 51.5 μM for <b>FLK-1 (VEGFR-2)</b> and <b>HER2</b>, respectively.	265.31	186611-11-0	C17H15NO2_x000D_	CCOC1=CC=CC=C1\C=C\2C(=O)NC3=CC=CC=C23	53.7462	13.2374
Afuresertib (GSK2110183)	Akt	PI3K/Akt/mTOR	Afuresertib (GSK2110183) is a potent, orally bioavailable Akt inhibitor with Ki of 0.08 nM, 2 nM, and 2.6 nM for Akt1, Akt2, and Akt3, respectively. Phase 2.	427.32	1047644-62-1	C18H17Cl2FN4OS	C[N]1N=CC(=C1C2=C(Cl)SC(=C2)C(=O)NC(CN)CC3=CC=CC(=C3)F)Cl	32.0181	18.1536
Platycodin D	Immunology & Inflammation related	Immunology & Inflammation	Platycodin D, the main saponin isolated from Chinese herb Platycodonis Radix, exhibits anti-inflammatory, anti-allergic, cholesterol-lowering and neuroprotective properties.	1225.32	58479-68-8	C57H92O28_x000D_	CC1OC(OC2C(O)C(O)COC2OC(=O)C34CCC(C)(C)CC3C5=CCC6C7(C)CC(O)C(OC8OC(CO)C(O)C(O)C8O)C(CO)(CO)C7CCC6(C)C5(C)CC4O)C(O)C(O)C1OC9OCC(O)C(OC%10OCC(O)(CO)C%10O)C9O	80.5412	-3.15237
SU1498	VEGFR	Protein Tyrosine Kinase	SU1498, a powerful inhibitor of KDR (IC50 = 0.7 μM), stimulates accumulation of phosphorylated ERK1/2 in endothelial cells.	390.52	168835-82-3	C25H30N2O2_x000D_	CC(C)C1=C(O)C(=CC(=C1)/C=C(C#N)/C(=O)NCCCC2=CC=CC=C2)C(C)C	61.4883	15.2023
ETP-46464	ATM/ATR,mTOR	PI3K/Akt/mTOR	ETP-46464 is a potent and selective inhibitor of ATR with IC50 of 25 nM.	470.52	1345675-02-6	C30H22N4O2	CC(C)(C#N)C1=CC=C(C=C1)N2C(=O)OCC3=C2C4=C(C=CC(=C4)C5=CN=C6C=CC=CC6=C5)N=C3	85.2448	59.9453
GSK2256098	FAK	Angiogenesis	GSK2256098 is a potent, selective, reversible, and ATP competitive FAK kinase inhibitor with apparent Ki of 0.4 nM.	414.89	1224887-10-8	C20H23ClN6O2	CONC(=O)C1=CC=CC=C1NC2=C(Cl)C=NC(=C2)NC3=CC(=N[N]3C(C)C)C	19.5049	14.3277
WAY-600	mTOR	PI3K/Akt/mTOR	WAY-600 is a potent, ATP-competitive and selective inhibitor of mTOR with IC50 of 9 nM blocks mTORC1/P-S6K(T389) and mTORC2/P-AKT(S473) but not P-AKT(T308) selective for mTOR than PI3Kα (>100-fold) and PI3Kγ (>500-fold).	494.59	1062159-35-6	C28H30N8O	C1CN(CCO1)C2=NC(=NC3=C2C=N[N]3C4CCN(CC4)CC5=CC=CN=C5)C6=CC7=C([NH]C=C7)C=C6	92.2522	13.7165
Cerdulatinib (PRT062070)	JAK	JAK/STAT	Cerdulatinib (PRT062070, PRT2070) is an oral active, multi-targeted tyrosine kinase inhibitor with IC50 of 12 nM/6 nM/8 nM/0.5 nM and 32 nM for JAK1/JAK2/JAK3/TYK2 and Syk, respectively. Also inhibits 19 other tested kinases with IC50 less than 200 nM.	445.54	1198300-79-6	C20H27N7O3S_x000D_	CC[S](=O)(=O)N1CCN(CC1)C2=CC=C(NC3=NC=C(C(N)=O)C(=N3)NC4CC4)C=C2	84.5299	76.0869
GNE-477	PI3K	PI3K/Akt/mTOR	GNE-477 is a potent and efficacious dual PI3K/mTOR inhibitor with an IC50 of 4 nM for PI3Kα and K<sub>iapp</sub> of 21 nM for mTOR.	504.63	1032754-81-6	C21H28N8O3S2_x000D_	CC1=C(CN2CCN(CC2)[S](C)(=O)=O)SC3=C(N=C(N=C13)C4=CN=C(N)N=C4)N5CCOCC5	82.5051	73.6615
PF-562271 HCl	FAK	Angiogenesis	PF-562271 HCl is the hydrochloride salt of PF-562271, which is a potent, ATP-competitive, reversible inhibitor of FAK with IC50 of 1.5 nM, ~10-fold less potent for Pyk2 than FAK and >100-fold selectivity against other protein kinases, except for some CDKs. Phase 1.	543.95	939791-41-0	C21H21ClF3N7O3S	Cl.CN(C1=C(CNC2=C(C=NC(=N2)NC3=CC=C4NC(=O)CC4=C3)C(F)(F)F)C=CC=N1)[S](C)(=O)=O	49.186	24.015
Regorafenib Hydrochloride	VEGFR	Protein Tyrosine Kinase	Regorafenib (Stivarga, BAY 73-4506) Hydrochloride is a multi-target inhibitor for <b>VEGFR1</b>, <b>Murine VEGFR2/3</b>, <b>PDGFRβ</b>, <b>Kit (c-Kit)</b>, <b>RET (c-RET)</b> and <b>Raf-1</b> with IC50 of 13 nM, 4.2 nM/46 nM, 22 nM, 7 nM, 1.5 nM and 2.5 nM, respectively.	519.28	835621-07-3	C21H16Cl2F4N4O3_x000D_	Cl.CNC(=O)C1=NC=CC(=C1)OC2=CC(=C(NC(=O)NC3=CC(=C(Cl)C=C3)C(F)(F)F)C=C2)F	70.294	15.8578
EHT 1864 2HCl	Rho	Cell Cycle	EHT 1864 2HCl is a potent Rac family GTPase inhibitor with Kd of 40 nM, 50 nM, 60 nM and 250 nM for Rac1, Rac1b, Rac2 and Rac3, respectively.	581.47	754240-09-0	C25H29Cl2F3N2O4S	Cl.Cl.FC(F)(F)C1=CC2=C(C=C1)C(=CC=N2)SCCCCCOC3=COC(=CC3=O)CN4CCOCC4	91.0172	17.7449
BAM 15	AMPK. apoptosis related	PI3K/Akt/mTOR	BAM 15 is a novel <b>mitochondrial protonophore</b> uncoupler capable of protecting mammals from acute renal ischemic-reperfusion injury and cold-induced microtubule damage. BAM 15 is also a potent <b>AMPK</b> activator. BAM 15 attenuates transportation-induced <b>apoptosis</b> in iPS-differentiated retinal tissue.	340.29	210302-17-3	C16H10F2N6O_x000D_	FC1=CC=CC=C1NC2=NC3=NON=C3N=C2NC4=CC=CC=C4F	72.0534	85.8521
CZC-8004	Bcr-Abl	Angiogenesis & Cytoskeletal Signaling & TGF-beta/Smad	CZC-8004 (CZC-00008004) is a pan-kinase inhibitor that binds a range of <b>tyrosine kinases</b> including <b>ABL</b> kinase.	309.34	916603-07-1	C17H16FN5_x000D_	NCC1=CC=C(NC2=NC(=C(F)C=N2)NC3=CC=CC=C3)C=C1	87.042	10.8641
3'-Hydroxypterostilbene	Others	Others	3'-Hydroxypterostilbene (3'-HPT) is one of the active constituents of Sphaerophysa salsula and Pterocarpus marsupium which may be useful in treating different types of haematological malignancies.	272.3	475231-21-1	C16H16O4	COC1=CC(=CC(=C1)/C=C/C2=CC(=C(O)C=C2)O)OC	70.7034	39.7633
AT7519	CDK	Cell Cycle	AT7519 is a multi-CDK inhibitor for CDK1, 2, 4, 6 and 9 with IC50 of 10-210 nM. It is less potent to CDK3 and little active to CDK7. Phase 2.	382.24	844442-38-2	C16H17Cl2N5O2	ClC1=CC=CC(=C1C(=O)NC2=C[NH]N=C2C(=O)NC3CCNCC3)Cl	83.3238	69.3622
AZD1390	ATM/ATR	PI3K/Akt/mTOR	AZD1390 is a first-in-class orally available and CNS penetrant ATM inhibitor with an IC50 of 0.78 nM in cells and >10,000-fold selectivity over closely related members of the PIKK family of enzymes and excellent selectivity across a broad panel of kinases.	477.57	2089288-03-7	C27H32FN5O2	CC(C)N1C(=O)N(C)C2=C1C3=CC(=C(F)C=C3N=C2)C4=CC=C(OCCCN5CCCCC5)N=C4	69.1407	23.443
LY2857785	CDK	Cell Cycle	LY2857785 is a type I reversible and competitive ATP kinase inhibitor against CDK9(IC50=0.011 μM) and also inhibits other transcription kinases CDK8(IC50=0.016 μM) and CDK7 (IC50=0.246 μM).	448.6	1619903-54-6	C26H36N6O	CC(C)C1=C2C=C(C=CC2=N[N]1C)C3=CC=NC(=N3)NC4CCC(CC4)NC5CCOCC5	59.0482	78.9967
Rottlerin	PKC	TGF-beta/Smad	Rottlerin, a natural compound purified from Mallotus Philippinensis, is a specific <b>Protein kinase</b> inhibitor with IC50 of 3 μM, 6 μM and 5.3 μM for PKCδ(from baculovirus-infected Sf9 insect cells), PKCδ(from porcine spleen) and CaM kinase III, respectively. Rottlerin also inhibits PKCα, PKCγ, PKCβ, PKCη, CKII and PKA with IC50 of 30 μM, 40 μM, 42 μM, 82 μM, 30 μM and 78 μM, respectively.	516.54	82-08-6	C30H28O8_x000D_	CC(=O)C1=C(O)C(=C(O)C(=C1O)C)CC2=C(O)C(=C3OC(C)(C)C=CC3=C2O)C(=O)\C=C\C4=CC=CC=C4	76.5104	87.5257
Apitolisib (GDC-0980, RG7422)	mTOR,PI3K	PI3K/Akt/mTOR	Apitolisib (GDC-0980, RG7422) is a potent, class I PI3K inhibitor for PI3Kα/β/δ/γ with IC50 of 5 nM/27 nM/7 nM/14 nM in cell-free assays, respectively. Also a mTOR inhibitor with Ki of 17 nM in a cell-free assay, and highly selective versus other PIKK family kinases. Phase 2.	498.6	1032754-93-0	C23H30N8O3S	CC(O)C(=O)N1CCN(CC1)CC2=C(C)C3=NC(=NC(=C3S2)N4CCOCC4)C5=CN=C(N)N=C5	68.7991	65.6474
VE-821	ATM/ATR	DNA Damage	VE-821 is a potent and selective ATP competitive inhibitor of ATR with Ki/IC50 of 13 nM/26 nM in cell-free assays, shows inhibition of H2AX phosphorylation, minimal activity against PIKKs ATM, DNA-PK, mTOR and PI3Kγ.	368.41	1232410-49-9	C18H16N4O3S	C[S](=O)(=O)C1=CC=C(C=C1)C2=CN=C(N)C(=N2)C(=O)NC3=CC=CC=C3	17.9796	12.8948
KPT-9274	NAMPT,PAK	Metabolism	KPT-9274 is an orally bioavailable small molecule that is a non-competitive dual inhibitor of PAK4 and NAMPT. It shows an IC50 of ~120 nM for NAMPT in a cell-free enzymatic assay.	610.62	1643913-93-2	C35H29F3N4O3	NC1=NC=C(C=C1)\C=C\C(=O)NCC2=CC3=C(O2)C(=CC(=C3)C4=CC=C(C=C4)C(=O)N5CCC(F)(F)CC5)C6=CC=C(F)C=C6	68.0115	4.83941
PP121	DNA-PK,mTOR,PDGFR,Src,VEGFR,Bcr-Abl	Protein Tyrosine Kinase	PP-121 is a multi-targeted inhibitor of PDGFR, Hck, mTOR, VEGFR2, Src and Abl with IC50 of 2 nM, 8 nM, 10 nM, 12 nM, 14 nM and 18 nM, also inhibits DNA-PK with IC50 of 60 nM.	319.36	1092788-83-4	C17H17N7	NC1=NC=NC2=C1C(=N[N]2C3CCCC3)C4=CN=C5[NH]C=CC5=C4	57.9402	76.0083
IQ-1S	JNK	MAPK	IQ-1S is a <b>JNK3</b> inhibitor with Kd values of 87, 360 and 390 nM for JNK3, JNK2 and JNK1, respectively.	247.25	23146-22-7	C15H9N3O_x000D_	O\N=C\1C2=CC=CC=C2C3=NC4=CC=CC=C4N=C13	47.5568	21.7616
Gedatolisib (PF-05212384, PKI-587)	mTOR,PI3K	PI3K/Akt/mTOR	Gedatolisib (PF-05212384, PKI-587) is a highly potent dual inhibitor of PI3Kα, PI3Kγ and mTOR with IC50 of 0.4 nM, 5.4 nM and 1.6 nM in cell-free assays, respectively. Phase 2.	615.73	1197160-78-3	C32H41N9O4	CN(C)C1CCN(CC1)C(=O)C2=CC=C(NC(=O)NC3=CC=C(C=C3)C4=NC(=NC(=N4)N5CCOCC5)N6CCOCC6)C=C2	63.4844	25.0517
1-Azakenpaullone	GSK-3	PI3K/Akt/mTOR	1-Azakenpaullone is a potent and selective GSK-3β inhibitor with IC50 of 18 nM, >100-fold selectivity over CDK1/cyclin B and CDK5/p25.	328.16	676596-65-9	C15H10BrN3O	BrC1=CC2=C([NH]C3=C2CC(=O)NC4=C3N=CC=C4)C=C1	75.3714	23.8073
RAF265 (CHIR-265)	Raf,VEGFR	MAPK	RAF265 (CHIR-265) is a potent selective inhibitor of C-Raf/B-Raf/B-Raf V600E with IC50 of 3-60 nM, and exhibits potent inhibition on VEGFR2 phosphorylation with EC50 of 30 nM in cell-free assays. Phase 2.	518.41	927880-90-8	C24H16F6N6O	C[N]1C(=NC2=C1C=CC(=C2)OC3=CC=NC(=C3)C4=NC=C([NH]4)C(F)(F)F)NC5=CC=C(C=C5)C(F)(F)F	86.5465	19.7997
Omipalisib (GSK2126458, GSK458)	mTOR,PI3K	PI3K/Akt/mTOR	Omipalisib (GSK2126458, GSK458) is a highly selective and potent inhibitor of p110α/β/δ/γ, mTORC1/2 with Ki of 0.019 nM/0.13 nM/0.024 nM/0.06 nM and 0.18 nM/0.3 nM in cell-free assays, respectively. Phase 1.	505.5	1086062-66-9	C25H17F2N5O3S	COC1=NC=C(C=C1N[S](=O)(=O)C2=CC=C(F)C=C2F)C3=CC=C4N=CC=C(C5=CC=NN=C5)C4=C3	65.9294	82.1634
WAY-615145	glucokinase	others	glucokinase activator	286.392	536736-95-5	C16H18N2OS	O=C(NC1=NC(=CS1)C2CCCCC2)C3=CC=CC=C3	67.3315	1.10207
PF-4989216	PI3K	PI3K/Akt/mTOR	PF-4989216 is a potent and selective PI3K inhibitor with IC50 of 2 nM, 142 nM, 65 nM, 1 nM, and 110 nM for p110α, p110β, p110γ, p110δ, and VPS34, respectively.	380.4	1276553-09-3	C18H13FN6OS	FC1=C(C=CC(=C1)C#N)C2=C(SC(=C2C#N)N3CCOCC3)C4=NC=N[NH]4	60.0991	31.0834
RU-301	Axl	Protein Tyrosine Kinase	RU-301 is a pan-TAM receptor (Axl, Tyro3 and Mertk) inhibitor that blocks the Axl receptor dimerization site with Kd of 12 μM and IC50 of 10 μM, respectively.	480.46	1110873-99-8	C21H19F3N4O4S_x000D_	CC1=NOC(=C1)CSC2=CC=CC=C2C(=O)NCCNC3=CC=C(C=C3[N+]([O-])=O)C(F)(F)F	91.1344	6.22862
A-674563	Akt,CDK,PKA	PI3K/Akt/mTOR	A-674563 is an Akt1 inhibitor with Ki of 11 nM in cell-free assays, modest potent to PKA and >30-fold selective for Akt1 over PKC.	358.44	552325-73-2	C22H22N4O	CC1=N[NH]C2=C1C=C(C=C2)C3=CN=CC(=C3)OCC(N)CC4=CC=CC=C4	76.2426	68.421
WAY-337532	CLK-1	Cell Cycle	active CLK-1 inhibitors; inhibition of the INLEDGF/p75 interaction;	356.803	332939-49-8	C19H17ClN2O3	COC1=CC=CC=C1C(NC(C)=O)C2=C(O)C3=NC=CC=C3C(=C2)Cl	56.431	-4.54737
Purvalanol A	CDK	Cell Cycle	Purvalanol A is a potent, and cell-permeable CDK inhibitor with IC50 of 4 nM, 70 nM, 35 nM, and 850 nM for cdc2-cyclin B, cdk2-cyclin A, cdk2-cyclin E, and cdk4-cyclin D1, respectively.	388.89	212844-53-6	C19H25ClN6O	CC(C)C(CO)NC1=NC(=C2N=C[N](C(C)C)C2=N1)NC3=CC=CC(=C3)Cl	28.6452	19.9818
GDC-0326	PI3K	PI3K/Akt/mTOR	GDC-0326 is a potent and selective inhibitor of PI3Kα with Ki value of 0.2 nM remarkably selective over the other class I isoforms in enzymatic assays.	382.42	1282514-88-8	C19H22N6O3	CC(C)[N]1N=CN=C1C2=C[N]3CCOC4=CC(=CC=C4C3=N2)OC(C)C(N)=O	22.6601	11.359
BLZ945	CSF-1R	Protein Tyrosine Kinase	BLZ945 is an orally active, potent and selective CSF-1R inhibitor with IC50 of 1 nM, >1000-fold selective against its closest receptor tyrosine kinase homologs.	398.48	953769-46-5	C20H22N4O3S	CNC(=O)C1=NC=CC(=C1)OC2=CC3=C(C=C2)N=C(NC4CCCCC4O)S3	70.1707	36.1113
OTS514 hydrochloride	TOPK	MAPK	OTS514 is a highly potent TOPK(T-LAK cell-originated protein kinase) inhibitor with an IC50 value of 2.6 nM.	400.92	1338540-63-8(free base)	C21H21ClN2O2S	Cl.CC(CN)C1=CC=C(C=C1)C2=C3C(=C(C)C=C2O)NC(=O)C4=C3C=CS4	58.6023	70.0211
CCT196969	Raf,Src	MAPK	CCT196969 is a novel orally available, pan-RAF inhibitor with anti-SRC activity. It also inhibits SRC, LCK, and the p38 MAPKs.	513.52	1163719-56-9	C27H24FN7O3	CC(C)(C)C1=N[N](C(=C1)NC(=O)NC2=CC=C(OC3=C4N=CC(=O)NC4=NC=C3)C=C2F)C5=CC=CC=C5	63.4802	35.4887
Bimiralisib (PQR309)	PI3K	PI3K/Akt/mTOR	Bimiralisib (PQR309) is a novel brain-penetrant dual <b>PI3K/mTOR</b> inhibitor with in vitro and in vivo antilymphoma activity. It displays excellent selectivity versus PI3K-related lipid kinases, protein kinases and unrelated targets.	411.38	1225037-39-7	C17H20F3N7O2	NC1=NC=C(C2=NC(=NC(=N2)N3CCOCC3)N4CCOCC4)C(=C1)C(F)(F)F	63.7154	60.5648
WAY-354831	c-Met	Protein Tyrosine Kinase	inhibitors of c-Met kinase	299.257	330572-32-2	C15H10FN3O3	OC1=CC=C(C=C1)C(=O)N\N=C2/C(=NC3=CC=C(F)C=C23)O	55.6993	27.0348
CH5132799	PI3K	PI3K/Akt/mTOR	CH5132799 inhibits class I PI3Ks, particularly PI3Kα with IC50 of 14 nM less potent to PI3Kβδγ, while sensitive in PIK3CA mutations cell lines. Phase 1.	377.42	1007207-67-1	C15H19N7O3S	C[S](=O)(=O)N1CCC2=C(N=C(N=C12)N3CCOCC3)C4=CN=C(N)N=C4	62.1227	3.36147
Apatinib	VEGFR/c-RET	Protein Tyrosine Kinase	Apatinib is a potent inhibitor of the <b>VEGF</b> signaling pathway with IC50 values of 1 nM, 13 nM, 429 nM and 530 nM for VEGFR-2, Ret (c-Ret), c-Kit and c-Src, respectively. Apatinib induces both <b>autophagy</b> and <b>apoptosis</b>.	397.47	811803-05-1	C24H23N5O_x000D_	O=C(NC1=CC=C(C=C1)C2(CCCC2)C#N)C3=C(NCC4=CC=NC=C4)N=CC=C3	81.5026	29.3273
Linsitinib (OSI-906)	IGF-1R	Protein Tyrosine Kinase	Linsitinib (OSI-906) is a selective inhibitor of IGF-1R with IC50 of 35 nM in cell-free assays modestly potent to InsR with IC50 of 75 nM, and no activity towards Abl, ALK, BTK, EGFR, FGFR1/2, PKA etc. Phase 3.	421.49	867160-71-2	C26H23N5O	CC1(O)CC(C1)C2=NC(=C3[N]2C=CN=C3N)C4=CC=C5C=CC(=NC5=C4)C6=CC=CC=C6	79.6836	12.4785
Phenformin HCl	AMPK	PI3K/Akt/mTOR	Phenformin HCl is a hydrochloride salt of phenformin that is an anti-diabetic drug from the biguanide class. It activates AMPK, increasing activity and phosphorylation.	241.72	834-28-6	C10H16ClN5	Cl.NC(=N)NC(=N)NCCC1=CC=CC=C1	75.3357	8.43064
Altiratinib	Trk receptor	Protein Tyrosine Kinase	Altiratinib is a potent single-digit nanomolar inhibitor of TRK, MET, TIE2, and VEGFR2 kinases with IC50 vaules of 0.9 nM, 4.6 nM, and 0.8 nM for TRKA, B, and C, respectively. It inhibits MET and MET mutant with IC50 values in the range of 0.3-6 nM.	510.46	1345847-93-9	C26H21F3N4O4_x000D_	FC1=CC=C(NC(=O)C2(CC2)C(=O)NC3=C(F)C=C(OC4=CC(=NC=C4)NC(=O)C5CC5)C(=C3)F)C=C1	88.2348	31.1512
PKM2 inhibitor(compound 3k)	PKM	Metabolism	PKM2 inhibitor(Compound 3K) displays PKM2 inhibitory activity with the IC50 value of 2.95 μM. The IC50 value for PKM1 is 4-5-fold higher than that for PKM2.	345.48	94164-88-2	C18H19NO2S2	CC1=C(CSC(=S)N2CCCCC2)C(=O)C3=CC=CC=C3C1=O	65.6737	24.1098
Aprepitant	Substance P	Others	Aprepitant is a potent and selective neurokinin-1 receptor antagonist with IC50 of 0.1 nM.	534.43	170729-80-3	C23H21F7N4O3	CC(OC1OCCN(CC2=NNC(=O)N2)C1C3=CC=C(F)C=C3)C4=CC(=CC(=C4)C(F)(F)F)C(F)(F)F	25.0454	-8.88493
DEL-22379	ERK	MAPK	DEL-22379 is a water-soluble ERK dimerization inhibitor with IC50 of ?0.5 μM.	444.53	181223-80-3	C26H28N4O3	COC1=CC2=C([NH]C=C2C=C3C(=O)NC4=CC=C(NC(=O)CCN5CCCCC5)C=C34)C=C1	-13.3714	17.6609
NQDI-1	ASK	Apoptosis	NQDI 1, an inhibitor of ASK1(apoptosis signal-regulating kinase 1), attenuates acute ischemic renal injury by modulating oxidative stress and cell death.	319.31	175026-96-7	C19H13NO4	CCOC(=O)C1=C2C3=C(C=CC=C3)C(=O)C4=C2C(=CC=C4)NC1=O	5.83719	-3.16817
ITD-1	TGF-beta/Smad	TGF-beta/Smad	ITD-1 is a potent <b>TGF-β</b> inhibitor. It does not block the kinase activity of either type I (TGFBR1) or type II (TGFBR2) TGFβ receptors but potently blocks phosphorylation of the effector SMAD2/3 proteins induced by TGFβ2, and only minimally in response to Activin A.	415.52	1099644-42-4	C27H29NO3_x000D_	CCOC(=O)C1=C(C)NC2=C(C1C3=CC=C(C=C3)C4=CC=CC=C4)C(=O)CC(C)(C)C2	7.30176	6.57207
Quercetin	Src,Sirtuin,PKC,PI3K	Epigenetics	Quercetin, a natural flavonoid present in vegetables, fruit and wine, is a stimulator of recombinant SIRT1 and also a PI3K inhibitor with IC50 of 2.4-5.4 μM. Phase 4.	302.24	117-39-5	C15H10O7	OC1=CC(=C2C(=O)C(=C(OC2=C1)C3=CC=C(O)C(=C3)O)O)O	67.8754	-7.74819
Atuveciclib (BAY-1143572)	CDK	Cell Cycle	Atuveciclib (BAY-1143572) is potent and highly selective <b>PTEFb/CDK9</b> inhibitor with <b>IC50</b> values of 13 nM for CDK9/CycT and the ratio of IC50 values for CDK2/CDK9 is about 100. Outside the CDK family, It inhibits GSK3 kinase with IC50 values of 45 nM and 87 nM for GSK3α and GSK3β respectively.	387.43	1414943-88-6	C18H18FN5O2S	COC1=CC(=CC=C1C2=NC(=NC=N2)NC3=CC(=CC=C3)C[S](C)(=N)=O)F	71.4132	64.5745
WAY-272449	FGFR1	Protein Tyrosine Kinase	FGFR1 inhibitors	358.799	670266-26-9	C17H11ClN2O3S	ClC1=CC=CC(=C1)N[S](=O)(=O)C2=C3C=CC=C4C(=O)NC(=C34)C=C2	80.6722	34.7049
WS3	IκB/IKK	NF-κB	WS3 is a β cell proliferation inducer via modulation of Erb3 binding protein-1 (EBP1) and the IκB kinase pathway.	569.58	1421227-52-2	C28H30F3N7O3	CN1CCN(CC1)CC2=C(C=C(NC(=O)NC3=CC=C(OC4=CC(=NC=N4)NC(=O)C5CC5)C=C3)C=C2)C(F)(F)F	70.9855	66.2191
PD 169316	p38 MAPK	MAPK	PD 169316 is a potent, selective and cell-permeable <b>p38 MAP kinase</b> inhibitor with IC50 of 89 nM. PD169316 abrogates signaling initiated by both <b>TGFbeta</b> and <b>Activin A</b>. PD169316 shows antiviral activity against <b>Enterovirus71</b>.	360.34	152121-53-4	C20H13FN4O2_x000D_	[O-][N+](=O)C1=CC=C(C=C1)C2=NC(=C([NH]2)C3=CC=NC=C3)C4=CC=C(F)C=C4	68.6754	39.591
GSK1059615	mTOR,PI3K	PI3K/Akt/mTOR	GSK1059615 is a dual inhibitor of PI3Kα/β/δ/γ (reversible) and mTOR with IC50 of 0.4 nM/0.6 nM/2 nM/5 nM and 12 nM, respectively. Phase 1.	333.36	958852-01-2	C18H11N3O2S	O=C1NC(=O)/C(S1)=C/C2=CC=C3N=CC=C(C4=CC=NC=C4)C3=C2	32.2131	-26.1353
7-Methoxyisoflavone	AMPK	PI3K/Akt/mTOR	7-Methoxyisoflavone (MIF) is a potent activator of <b>adenosine monophosphate-activated protein kinase (AMPK)</b>.	252.26	1621-56-3	C16H12O3_x000D_	COC1=CC2=C(C=C1)C(=O)C(=CO2)C3=CC=CC=C3	72.6626	35.7909
Doxorubicin (Adriamycin) HCl	Topoisomerase	DNA Damage	Doxorubicin (Adriamycin) HCl is an antibiotic agent that inhibits DNA topoisomerase II and induces DNA damage and apoptosis in tumor cells.	579.98	25316-40-9	C27H30ClNO11	Cl.COC1=C2C(=O)C3=C(C(=C4CC(O)(CC(OC5CC(N)C(O)C(C)O5)C4=C3O)C(=O)CO)O)C(=O)C2=CC=C1	68.066	36.6239
Crizotinib (PF-02341066)	ALK,c-Met	Protein Tyrosine Kinase	Crizotinib (PF-02341066) is a potent inhibitor of c-Met and ALK with IC50 of 11 nM and 24 nM in cell-based assays, respectively.	450.34	877399-52-5	C21H22Cl2FN5O	CC(OC1=C(N)N=CC(=C1)C2=C[N](N=C2)C3CCNCC3)C4=C(Cl)C=CC(=C4Cl)F	79.1878	19.7593
PIK-75 HCl	DNA-PK,PI3K	PI3K/Akt/mTOR	PIK-75 HCl is a p110α inhibitor with IC50 of 5.8 nM (200-fold more potently than p110β), isoform-specific mutants at Ser773, and also potently inhibits DNA-PK with IC50 of 2 nM in cell-free assays.	488.74	372196-77-5	C16H15BrClN5O4S	Cl.CN(/N=C/C1=CN=C2C=CC(=C[N]12)Br)[S](=O)(=O)C3=C(C)C=CC(=C3)[N+]([O-])=O	67.9408	75.3697
NCT-503	Dehydrogenase	Metabolism	NCT-503 is a phosphoglycerate dehydrogenase (PHGDH) inhibitor with the IC50 value of 2.5 μM. It is inactive against a panel of other dehydrogenases and shows minimal cross-reactivity in a panel of 168 GPCRs.	408.48	1916571-90-8	C20H23F3N4S	CC1=CC(=NC(=C1)C)NC(=S)N2CCN(CC2)CC3=CC=C(C=C3)C(F)(F)F	92.6872	39.9127
LCH-7749944	PAK	Cytoskeletal Signaling	LCH-7749944 (GNF-PF-2356) is a novel and potent p21-activated kinase 4 (PAK4) inhibitor with an IC50 of 14.93 μM and has less potently inhibitory effect against PAK1, PAK5 and PAK6. LCH-7749944 causes successful inhibition of EGFR activity due to its inhibitory effect on PAK4.	350.41	796888-12-5	C20H22N4O2_x000D_	COC1=CC=CC(=C1)NC2=NC3=CC=CC=C3C(=N2)NCC4CCCO4	62.386	29.5496
Pexmetinib (ARRY-614)	p38 MAPK,Tie-2	MAPK	Pexmetinib (ARRY-614) is a potent, orally bioavailable, dual p38 MAPK/Tie-2 inhibitor with IC50 of 4 nM/18 nM in a HEK-293 cell line. Phase 1.	556.63	945614-12-0	C31H33FN6O3	CC1=CC=C(C=C1)[N]2N=C(C=C2NC(=O)NCC3=C(OC4=CC5=C(C=C4)[N](CCO)N=C5)C=CC(=C3)F)C(C)(C)C	10.2369	23.7019
GDC-0084	PI3K,mTOR	PI3K/Akt/mTOR	GDC-0084 is a brain penetrant inhibitor of PI3K and mTOR with Kiapp values of 2 nM, 46 nM, 3 nM, 10 nM and 70 nM for PI3Kα, PI3Kβ, PI3Kδ, PI3Kγ and mTOR.	382.42	1382979-44-3	C18H22N8O2	CC1(C)OCC[N]2C3=C(N=C12)C(=NC(=N3)C4=CN=C(N)N=C4)N5CCOCC5	75.2998	51.1836
WAY-323534	PASK	others	inhibition of PASK	349.814	854040-96-3	C20H16ClN3O	CC1=C(CC2=CC=CC=C2)C(=O)[N]3N=CC(=C3N1)C4=CC=C(Cl)C=C4	28.1773	27.4559
1-NM-PP1	Src	Angiogenesis	1-NM-PP1 (PP1 Analog II, 1NM-PP1, analogue 9) is a potent inhibitor of Src family kinases with IC50 of 4.3 nM and 3.2 nM for v-Src-as1 and c-Fyn-as1, respectively. 1-NM-PP1 also inhibits CDK2-as1, CAMKII-as1 and c-Abl-as2 with IC50 of 5.0 nM, 8.0 nM and 120 nM, respectively.	331.41	221244-14-0	C20H21N5_x000D_	CC(C)(C)[N]1N=C(CC2=CC=CC3=CC=CC=C23)C4=C(N)N=CN=C14	73.4174	-4.59911
GNE-493	PI3K. mTOR.	PI3K/Akt/mTOR	GNE-493 (compound 5) is a potent, selective and orally available dual inhibitor of pan-<b>PI3-kinase</b> and <b>mTOR</b> with IC50 of 3.4 nM, 12 nM, 16 nM, 16 nM and 32 nM for PI3Kα, PI3Kβ, PI3Kδ, PI3Kγ and mTOR, respectively.	372.44	1033735-94-2	C17H20N6O2S_x000D_	CC(C)(O)C1=CC2=NC(=NC(=C2S1)N3CCOCC3)C4=CN=C(N)N=C4	71.5573	57.5602
AST-487 (NVP-AST487)	FLT3	Angiogenesis	AST-487,a N,N'-diphenyl urea,is an ATP competitive inhibitor of <b>Flt3</b> with ki of 0.12 μM.Besides FLT3, AST487 also inhibits <b>RET,KDR,c-KIT,and c-ABL kinase</b> with IC50 values below 1 μM.	529.56	630124-46-8	C26H30F3N7O2_x000D_	CCN1CCN(CC1)CC2=C(C=C(NC(=O)NC3=CC=C(OC4=NC=NC(=C4)NC)C=C3)C=C2)C(F)(F)F	84.9756	36.2269
WAY-272324	PI3K	PI3K/Akt/mTOR	Phosphoinositide 3-Kinase γ inhibitor	329.327	900515-01-7	C16H11NO5S	COC(=O)C1=CC=CC=C1C2=CC=C(O2)\C=C\3SC(=O)NC3=O	69.6239	31.0266
SF2523	PI3K,DNA-PK,Epigenetic Reader Domain,mTOR	PI3K/Akt/mTOR	SF2523 is a highly selective and potent inhibitor of PI3K with IC50 values of 34 nM, 158 nM, 9 nM, 241 nM and 280 nM for PI3Kα, PI3Kγ, DNA-PK, BRD4 and mTOR, respectively.	371.41	1174428-47-7	C19H17NO5S	O=C1C=C(OC2=C1SC=C2C3=CC=C4OCCOC4=C3)N5CCOCC5	52.8544	12.1555
KX2-391	Src	Angiogenesis	KX2-391, the first clinical Src inhibitor (peptidomimetic class) that targets the peptide substrate site of Src, with GI50 of 9-60 nM in cancer cell lines. Phase 2.	431.53	897016-82-9	C26H29N3O3	O=C(CC1=CC=C(C=N1)C2=CC=C(OCCN3CCOCC3)C=C2)NCC4=CC=CC=C4	87.9602	56.1927
SEL201	MNK	MAPK	SEL-201 (SLV-2436, SEL201-88) is a highly potent and ATP-competitive inhibitor of MNK1 and MNK2 with IC50 of 10.8 nM and 5.4 nM, respectively.	350.8	2095704-43-9	C19H15ClN4O_x000D_	NC1=N[NH]C2=C1C=CC(=C2)C3=CN(CC4=CC(=CC=C4)Cl)C(=O)C=C3	8.11025	5.57075
THAL-SNS-032	CDK. PROTAC. E3 Ligase	Cell Cycle	THAL-SNS-032 is a selective <b>Cyclin-dependent kinase 9 (CDK9)</b> degrader PROTAC consisting of a CDK-binding SNS-032 ligand linked to a thalidomide derivative that binds the <b>E3 ubiquitin ligase Cereblon (CRBN)</b>.	869.02	2139287-33-3	C40H52N8O10S2_x000D_	CC(C)(C)C1=CN=C(CSC2=CN=C(NC(=O)C3CCN(CC3)CC(=O)NCCOCCOCCOCCNC4=CC=CC5=C4C(=O)N(C6CCC(=O)NC6=O)C5=O)S2)O1	70.5985	75.6672
Nocodazole	Autophagy,Microtubule Associated	Cytoskeletal Signaling	Nocodazole is a rapidly-reversible inhibitor of microtubule polymerization, also inhibits Abl, Abl(E255K) and Abl(T315I) with IC50 of 0.21 μM, 0.53 μM and 0.64 μM in cell-free assays, respectively.	301.32	31430-18-9	C14H11N3O3S	COC(=O)NC1=NC2=CC=C(C=C2[NH]1)C(=O)C3=CC=CS3	89.0465	45.7858
AZD5438	CDK	Cell Cycle	AZD5438 is a potent inhibitor of CDK1/2/9 with IC50 of 16 nM/6 nM/20 nM in cell-free assays. It is less potent to CDK5/6 and also inhibits GSK3β. Phase 1.	371.46	602306-29-6	C18H21N5O2S	CC(C)[N]1C(=NC=C1C2=NC(=NC=C2)NC3=CC=C(C=C3)[S](C)(=O)=O)C	75.6504	57.9973
JSH-150	CDK	Cell Cycle	JSH-150 is a highly selective and potent inhibitor of CDK9 with IC50 of 1 nM.	505.08	2247481-21-4	C24H33ClN6O2S_x000D_	COCCNC1CCC(CC1)NC2=NC=C(Cl)C(=C2)C3=CSC(=N3)NCC4(CCOCC4)C#N	72.5817	72.4833
NVP-2	CDK	Cell Cycle	NVP-2, a potent, selective, non-neurotoxic and ATP-competitive cyclin dependent kinase 9 (CDK9) inhibitor with IC50 of 0.514 nM for CDK9/CycT activity and induces cell apoptosis.	513.07	1263373-43-8	C27H37ClN6O2_x000D_	COCC(C)NC1CCC(CC1)NC2=CC(=C(Cl)C=N2)C3=NC(=CC=C3)NCC4(CCOCC4)C#N	69.4442	70.8929
CH5183284 (Debio-1347)	FGFR	Angiogenesis	CH5183284 is a selective and orally available FGFR inhibitor with IC50 of 9.3 nM, 7.6 nM, 22 nM, and 290 nM for FGFR1, FGFR2, FGFR3, and FGFR4, respectively. Phase 1.	356.38	1265229-25-1	C20H16N6O	CC1=NC2=C([NH]1)C=C(C=C2)[N]3N=CC(=C3N)C(=O)C4=CC5=C([NH]4)C=CC=C5	53.2414	34.4636
THZ531	CDK	Cell Cycle	THZ531 is a selective covalent inhibitor of <b>CDK12</b> and <b>CDK13</b> with IC50 values of 158 and 69 nM, respectively.	558.07	1702809-17-3	C30H32ClN7O2_x000D_	CN(C)C/C=C/C(=O)NC1=CC=C(C=C1)C(=O)N2CCCC(C2)NC3=NC(=C(Cl)C=N3)C4=C[NH]C5=C4C=CC=C5	66.1503	30.0327
Azaindole 1 (TC-S 7001)	ROCK	Cell Cycle	Azaindole 1 (TC-S 7001) is a selective <b>Rho-associated protein kinase (ROCK)</b> inhibitor with IC50 of 0.6 and 1.1 nM for human ROCK-1 and ROCK-2 in an ATP-competitive manner.	402.79	867017-68-3	C18H13ClF2N6O_x000D_	CC1=C[NH]C2=NC=CC(=C12)OC3=C(F)C=C(NC4=NC(=NC(=C4)Cl)N)C=C3F	93.8326	32.7782
MTX-211	EGFR	Protein Tyrosine Kinase	MTX-211 is a first-in-class dual inhibitor of PI3K and EGFR kinase .	478.33	1952236-05-3	C20H14Cl2FN5O2S_x000D_	C[S](=O)(=O)NC1=CC(=CN=C1Cl)C2=CC3=C(NC4=CC=C(F)C(=C4)Cl)N=CN=C3C=C2	63.451	43.766
Bisindolylmaleimide I (GF109203X)	PKC	TGF-beta/Smad	Bisindolylmaleimide I (GF109203X) is a potent PKC inhibitor with IC50 of 20 nM, 17 nM, 16 nM, and 20 nM for PKCα, PKCβI, PKCβII, and PKCγ in cell-free assays, respectively, showing more than 3000-fold selectivity for PKC as compared to EGFR, PDGFR and insulin receptor.	412.48	133052-90-1	C25H24N4O2	CN(C)CCC[N]1C=C(C2=CC=CC=C12)C3=C(C(=O)NC3=O)C4=C[NH]C5=CC=CC=C45	81.8107	11.3624
CID44216842	Rho	Cell Cycle	CID44216842 (Cdc42-IN-1) is a potent Cdc42-selective guanine nucleotide binding lead inhibitor with EC50s of 1.0 μM and 1.2 μM for Cdc42<sup>WT</sup> and Cdc42<sup>Q61L</sup> mutant in GTP binding assay, respectively.	486.38	1222513-26-9	C22H20BrN3O3S_x000D_	COC1=CC(=CC=C1)C2=NN(C(C2)C3=CC=C(Br)C=C3)C4=CC=C(C=C4)[S](N)(=O)=O	18.7402	-2.68896
BAY 1251152	CDK	Cell Cycle	BAY1251152 is a potent PTEFb/CDK9 inhibitor with an IC50 value of 3 nM for CDK9 and an at least 50-fold selectivity against other CDKs in enzymatic assays. BAY1251152 binds to and blocks the phosphorylation and kinase activity of CDK9, thereby preventing PTEFb-mediated activation of RNA Pol II and leading to the inhibition of gene transcription of various anti-apoptotic proteins.	404.43	1610358-56-9	C19H18F2N4O2S_x000D_	COC1=C(C=CC(=C1)F)C2=CC(=NC=C2F)NC3=NC=CC(=C3)C[S](C)(=N)=O	76.7332	66.1559
Mitoxantrone 2HCl	Topoisomerase	DNA Damage	Mitoxantrone is a type II topoisomerase inhibitor with IC50 of 2.0 μM, 0.42 mM for HepG2 and MCF-7/wt cells, respectively.	517.4	70476-82-3	C22H30Cl2N4O6	Cl.Cl.OCCNCCNC1=CC=C(NCCNCCO)C2=C1C(=O)C3=C(O)C=CC(=C3C2=O)O	75.52	3.99689
TG100713	PI3K	PI3K/Akt/mTOR	TG100713 is a pan-PI3K inhibitor against PI3Kγ, PI3Kδ, PI3Kα and PI3Kβ with IC50 of 50 nM, 24 nM, 165 nM and 215 nM, respectively.	254.25	925705-73-3	C12H10N6O	NC1=NC(=C2N=C(C=NC2=N1)C3=CC(=CC=C3)O)N	63.7784	-5.36112
AZD8835	PI3K	PI3K/Akt/mTOR	AZD8835 ia a novel mixed inhibitor of PI3Kα and PI3Kδ with IC50 of 6.2 nM and 5.7 nM, respectively, also with selectivity against PI3Kβ (IC50=431 nM) and PI3Kγ (IC50=90 nM).	469.54	1620576-64-8	C22H31N9O3	CC[N]1N=C(N=C1C2=CN=C(N)C(=N2)C3=NN=C(O3)C(C)(C)C)C4CCN(CC4)C(=O)CCO	23.1324	8.3731
Irbinitinib (ARRY-380, ONT-380)	HER2	Protein Tyrosine Kinase	ARRY-380 (ONT-380) is an oral, potent, selective, reversible and ATP-competitive small-molecule inhibitor of ErbB-2 (also called HER2) with IC50s of 8 nM and 7 nM for ErbB-2 and p95 HER2, respectively in cell-based assays, showing ~500-fold selective for HER2 vs EGFR. It has potential antineoplastic activity.	480.52	937263-43-9	C26H24N8O2	CC1=CC(=CC=C1OC2=CC3=NC=N[N]3C=C2)NC4=NC=NC5=CC=C(NC6=NC(C)(C)CO6)C=C45	32.1646	-10.7397
Ralimetinib (LY2228820)	p38 MAPK	MAPK	Ralimetinib (LY2228820) is a novel and potent inhibitor of p38 MAPK with IC50 of 7 nM in a cell-free assay, does not alter p38 MAPK activation. Phase 1/2.	612.74	862507-23-1	C26H37FN6O6S2	CC(C)(C)C[N]1C(=NC2=C1N=C(C=C2)C3=C(N=C([NH]3)C(C)(C)C)C4=CC=C(F)C=C4)N.C[S](O)(=O)=O.C[S](O)(=O)=O	15.1976	-24.2165
TBK1/IKKε-IN-2	IκB/IKK	NF-κB	TBK1/IKKε-IN-2 is a dual inhibitor of TBK1 and IKKε._x000D_	457.52	1292310-49-6	C26H27N5O3_x000D_	N#CC1=C(OC2CCOCC2)C=CC(=C1)C3=NC(=NC=C3)NC4=CC=C(C=C4)N5CCOCC5	75.9515	51.4479
Indirubin-3'-monoxime	CDK	Cell Cycle	Indirubin-3'-monoxime is a selective <b>CDK</b> inhibitor with IC50 of 0.18 μM, 0.44 μM, 0.25 μM, 3.33 μM, 0.1 μM for <b>CDK1-cyclinB</b>, <b>CDK2-cyclinA</b>, <b>CDK2-cyclinE</b>, <b>CDK4-cyclinD1</b>, <b>CDK5-p35</b>,respectively. Indirubin-3'-monoxime is a direct and selective <b>5-lipoxygenase</b> inhibitor with IC50 of 7.8-10 µM.	277.28	160807-49-8	C16H11N3O2_x000D_ _x000D_	O/N=C1/C(NC2=C1C=CC=C2)=C3\C(=O)NC4=C3C=CC=C4	67.3848	18.3707
Alsterpaullone	CDK. GSK-3. apoptosis related. Caspase	Cell Cycle. PI3K/Akt/mTOR & Stem Cells & Wnt	Alsterpaullone (Alp, 9-Nitropaullone, NSC 705701) is a potent inhibitor of <b>CDK</b> with IC50 of 35 nM, 15 nM, 200 nM and 40 nM for CDK1/cyclin B, CDK2/cyclin A, CDK2/cyclin E and CDK5/p35, respectively. Alsterpaullone also acts as a potent inhibitor of <b>glycogen synthase kinase-3 (GSK-3)</b> with IC50 of both 4 nM for GSK-3α and GSK-3β. Alsterpaullone induces <b>apoptosis</b> by activation o…	293.28	237430-03-4	C16H11N3O3_x000D_	[O-][N+](=O)C1=CC2=C([NH]C3=C2CC(=O)NC4=CC=CC=C34)C=C1	84.8751	53.7671
Orelabrutinib	BTK	Angiogenesis	Orelabrutinib is a potent, orally active and irreversible inhibitor of Bruton's tyrosine kinase (BTK). Orelabrutinib has potential antineoplastic activity.	427.49	1655504-04-3	C26H25N3O3_x000D_	NC(=O)C1=C(N=C(C=C1)C2CCN(CC2)C(=O)C=C)C3=CC=C(OC4=CC=CC=C4)C=C3	66.7287	58.5341
CASIN	Rho	Cell Cycle	CASIN (Pirl1-related Compound 2) directly inhibits activation of Cdc42/RhoGDI with IC50 of 2 μM.	306.4	425399-05-9	C20H22N2O_x000D_	OCCNC1CCCC2=C1[NH]C3=C2C=C(C=C3)C4=CC=CC=C4	14.553	-11.7947
Silmitasertib sodium salt	Casein Kinase	Metabolism	Silmitasertib sodium salt is a potent, orally bioavailable and selective inhibitor of casein kinase 2 (CK2) with IC50 of 1 nM against CK2α and CK2α'.	371.75	1309357-15-0	C19H11ClN3NaO2_x000D_	[Na+].[O-]C(=O)C1=CC2=C(C=C1)C3=C(C=CN=C3)C(=N2)NC4=CC(=CC=C4)Cl	76.0848	-8.46151
RO9021	Syk	Angiogenesis	RO9021 potently inhibits SYK kinase activity with an average IC50 of 5.6 nM and suppresses B-cell receptor signaling.	355.44	1446790-62-0	C18H25N7O	CC1=CC=C(NC2=C(N=NC(=C2)NC3CCCCC3N)C(N)=O)N=C1C	81.6373	42.9474
Silmitasertib (CX-4945)	Casein Kinase	Metabolism	Silmitasertib (CX-4945) is a potent and selective inhibitor of CK2 (casein kinase 2) with IC50 of 1 nM in a cell-free assay, less potent to Flt3, Pim1 and CDK1 (inactive in cell-based assay). Phase 1/2.	349.77	1009820-21-6	C19H12ClN3O2	OC(=O)C1=CC2=C(C=C1)C3=CN=CC=C3C(=N2)NC4=CC(=CC=C4)Cl	76.9931	-2.66894
THZ1 2HCl	CDK	Cell Cycle	THZ1 is a covalent CDK7 inhibitor which has the unprecedented ability to target a remote cysteine residue located outside of the canonical kinase domain, providing an unanticipated means of achieving selectivity for CDK7.	638.97	1604810-83-4(free base)	C31H30Cl3N7O2	Cl.Cl.CN(C)C/C=C/C(=O)NC1=CC=C(C=C1)C(=O)NC2=CC=CC(=C2)NC3=NC=C(Cl)C(=N3)C4=C[NH]C5=C4C=CC=C5	40.7043	30.4946
Fendiline hydrochloride	Calcium Channel,Ras	Transmembrane Transporters	Fendiline hydrochloride is the hydrochloride salt form of Fendiline, which is an L-type calcium channel blocker and also a specific inhibitor of K-Ras plasma membrane targeting with no detectable effect on the localization of H- and N-Ras.	351.91	13636-18-5	C23H26ClN	Cl.CC(NCCC(C1=CC=CC=C1)C2=CC=CC=C2)C3=CC=CC=C3	12.205	17.9911
Genistein	EGFR,Topoisomerase	Protein Tyrosine Kinase	Genistein, a phytoestrogen found in soy products, is a highly specific inhibitor of protein tyrosine kinase (PTK) which blocks the mitogenic effect mediated by EGF on NIH-3T3 cells with IC50 of 12μM or by insulin with IC50 of 19 μM.	270.24	446-72-0	C15H10O5	OC1=CC=C(C=C1)C2=COC3=C(C(=CC(=C3)O)O)C2=O	70.7121	29.8906
SU5402	FGFR,VEGFR	Protein Tyrosine Kinase	SU5402 is a potent multi-targeted receptor tyrosine kinase inhibitor with IC50 of 20 nM, 30 nM, and 510 nM for VEGFR2, FGFR1, and PDGF-Rβ, respectively.	296.32	215543-92-3	C17H16N2O3	CC1=C[NH]C(=C1CCC(O)=O)C=C2C(=O)NC3=C2C=CC=C3	47.8991	38.4834
XL147 analogue	PI3K	PI3K/Akt/mTOR	XL147 analogue is a selective and reversible class I PI3K inhibitor for PI3Kα/δ/γ with IC50 of 39 nM/36 nM/23 nM in cell-free assays, less potent to PI3Kβ. Phase 1/2.	448.52	956958-53-5	C21H16N6O2S2	CC1=CC=C(C=C1)[S](=O)(=O)NC2=NC3=CC=CC=C3N=C2NC4=CC5=NSN=C5C=C4	36.3357	-10.7694
OICR-9429	Histone Methyltransferase	Epigenetics	OICR-9429 is a potent antagonist of the interaction of WDR5 with peptide regions of MLL and Histone 3 and reduces viability of acute myeloid leukemia cells in vitro. It binds to WDR5 with high affinity (KD = 93 ± 28 nM.	555.59	1801787-56-3	C29H32F3N5O3	CN1CCN(CC1)C2=CC=C(C=C2NC(=O)C3=CNC(=O)C=C3C(F)(F)F)C4=CC(=CC=C4)CN5CCOCC5	3.72733	-0.83097
Oclacitinib?maleate	JAK	JAK/STAT	Oclacitinib(PF 03394197) is a novel inhibitor of JAK family members with IC50 ranging from 10 to 99 nM and JAK1-dependent cytokines with IC50 ranging from 36 to 249 nM. It does not inhibit a panel of 38 non-JAK kinases.	453.51	1640292-55-2	C19H27N5O6S	CN[S](=O)(=O)CC1CCC(CC1)N(C)C2=C3C=C[NH]C3=NC=N2.OC(=O)\C=C/C(O)=O	38.4083	25.2585
WAY-658513	ROCK, ERK, GSK, and AGC	Cell Cycle & TGF-beta/Smad & Stem Cells & Wnt, MAPK	inhibitor of ROCK, ERK, GSK, and AGC protein kinases	347.794	692870-25-0	C16H11ClFN3OS	FC1=C(CC(=O)NC2=NC(=CS2)C3=CC=NC=C3)C(=CC=C1)Cl	67.2636	21.5053
WAY-333883	pyruvate kinase	Metabolism	altering the lifespan of a eukaryotic organism; pyruvate kinase activators and inhibitors;	351.23	863448-35-5	C16H16Cl2N4O	CC(C)(C)[N]1N=CC2=C1N=CN(CC3=CC=C(Cl)C=C3Cl)C2=O	57.1298	26.9722
PD173955	Bcr-Abl	Angiogenesis	PD173955 is a potent Bcr-Abl inhibitor with IC50 of 1-2 nM, also inhibiting Src activity with IC50 of 22 nM.	443.35	260415-63-2	C21H18Cl2N4OS	CSC1=CC(=CC=C1)NC2=NC3C(C=N2)C=C(C(=O)N3C)C4=C(Cl)C=CC=C4Cl	66.5452	16.2079
SR-4835	CDK	Cell Cycle	SR-4835 is a highly selective dual inhibitor of <b>CDK12</b> and <b>CDK13</b> with IC50 of 99 nM and Kd of 98 nM for CDK12 and IC50 of 4.9 nM for CDK13. SR-4835 disables triple-negative breast cancer (TNBC) cells. SR-4835 promotes synergy with DNA-damaging chemotherapy and PARP inhibitors.	499.36	2387704-62-1	C21H20Cl2N10O_x000D_	C[N]1C=C(C=N1)[N]2C=NC3=C2N=C(N=C3NCC4=NC5=C([NH]4)C=C(Cl)C(=C5)Cl)N6CCOCC6	59.3688	42.0634
WAY-311972	ATP-kinases	others	inhibitors of ATP-kinases	440.29	606948-76-9	C21H18BrN3O3	CCN(CC)C1=CC2=C(C=C1)C=C(C(=O)O2)C3=NN=C(O3)C4=CC=CC=C4Br	23.9483	16.0305
Berberine chloride	Anti-infection	Microbiology	Berberine chloride is a quaternary ammonium salt from the group of isoquinoline alkaloids.	371.81	633-65-8	C20H18ClNO4	[Cl-].COC1=CC=C2C=C3C4=C(CC[N+]3=CC2=C1OC)C=C5OCOC5=C4	63.1273	2.28656
WS6	IκB/IKK	NF-κB	WS6 is a β cell proliferation inducer via modulation of Erb3 binding protein-1 (EBP1) and the IκB kinase pathway.	568.59	1421227-53-3	C29H31F3N6O3	CN1CCN(CC1)CC2=C(C=C(NC(=O)CC3=CC=C(OC4=CC(=NC=N4)NC(=O)C5CC5)C=C3)C=C2)C(F)(F)F	67.1021	25.2609
OTS964	TOPK	MAPK	OTS964 is a potent TOPK inhibitor with high affinity and selectivity and IC50 value is 28 nM.	428.97	1338545-07-5	C23H26Cl2N2O2S	Cl.Cl.CC(CN(C)C)C1=CC=C(C=C1)C2=C3C(=C(C)C=C2O)NC(=O)C4=C3C=CS4	54.7011	68.0747
PND-1186 (VS-4718)	FAK	Angiogenesis	PND-1186 (VS-4718) is a reversible and selective FAK inhibitor with IC50 of 1.5 nM. Phase 1.	501.5	1061353-68-1	C25H26F3N5O3	CNC(=O)C1=CC=CC=C1NC2=CC(=NC=C2C(F)(F)F)NC3=CC=C(C=C3OC)N4CCOCC4	30.0038	23.1858
Chelerythrine Chloride	PKC	TGF-beta/Smad	Chelerythrine is a potent, selective antagonist of <b>PKC</b> with <b>IC50</b> of 0.66 mM.	384.83	3895-92-9	C21H18NO4.HCl_x000D_	Cl.COC1=CC=C2C(=C1OC)C=[N+](C)C3=C2C=CC4=C3C=C5OCOC5=C4	58.9855	22.4264
CEP-32496	CSF-1R,Raf	MAPK	CEP-32496 is a highly potent inhibitor of BRAF(V600E/WT) and c-Raf with Kd of 14 nM/36 nM and 39 nM, also potent to Abl-1, c-Kit, Ret, PDGFRβ and VEGFR2, respectively insignificant affinity for MEK-1, MEK-2, ERK-1 and ERK-2. Phase 1/2.	517.46	1188910-76-0	C24H22F3N5O5	COC1=CC2=NC=NC(=C2C=C1OC)OC3=CC(=CC=C3)NC(=O)NC4=NOC(=C4)C(C)(C)C(F)(F)F	79.4215	21.0324
VPS34 inhibitor 1 (Compound 19, PIK-III analogue)	PI3K	PI3K/Akt/mTOR	VPS34 inhibitor 1 (Compound 19, PIK-III analogue) is a potent and selective inhibitor of VPS34 with an IC50 of 15 nM.	391.47	1383716-46-8	C21H25N7O	CC(C)(O)CNC1=NC=C(C(=N1)CC2CC2)C3=CC=NC(=N3)NC4=CC=NC=C4	53.5426	75.8293
LY2874455	FGFR,VEGFR	Protein Tyrosine Kinase	LY2874455 is a pan-FGFR inhibitor with IC50 of 2.8 nM, 2.6 nM, 6.4 nM, and 6 nM for FGFR1, FGFR2, FGFR3, and FGFR4, respectively, and also inhibits VEGFR2 activity with IC50 of 7 nM. Phase 1.	444.31	1254473-64-7	C21H19Cl2N5O2	CC(OC1=CC=C2[NH]N=C(\C=C\C3=C[N](CCO)N=C3)C2=C1)C4=C(Cl)C=NC=C4Cl	60.9482	72.7907
IRAK4-IN-4	IRAK, cGAS	Immunology & Inflammation	IRAK4-IN-4 (compound 15) is an inhibitor of <b>interleukin-1 receptor–associated kinase 4 (IRAK4)</b> and <b>cyclic GMP-AMP synthase (cGAS)</b> with IC50 of 2.8 nM and 2.1 nM, respectively.	340.37	1850276-58-2	C22H16N2O2_x000D_	CC1=CC2=NC(=C([N]2C=C1)C(=O)C(=O)C3=CC=CC=C3)C4=CC=CC=C4	61.6094	7.91681
CAY10505	PI3K	PI3K/Akt/mTOR	CAY10505 is dehydroxyl of AS-252424, which is a PI3Kγ inhibitor with IC50 of 33 nM.	289.28	1218777-13-9	C14H8FNO3S	FC1=CC=C(C=C1)C2=CC=C(O2)\C=C/3SC(=O)NC3=O	80.1832	7.0527
TPX-0005	Src,ALK	Protein Tyrosine Kinase	TPX-0005 is a novel ALK/ROS1/TRK inhibitor with the IC50 values of 1.01 nM for WT ALK, 1.26 nM for ALK(G1202R), and 1.08 nM for ALK(L1196M) also a potent SRC inhibitor (IC50 5.3 nM).	355.37	1802220-02-5	C18H18FN5O2	CC1CNC(=O)C2=C3N=C(NC(C)C4=C(O1)C=CC(=C4)F)C=C[N]3N=C2	73.8189	36.9794
CCCP	Others	Others	CCCP, an oxidative phosphorylation inhibitor, is a protonophore mitochondrial uncoupler that increases membrane permeability to protons, leading to a disruption in the mitochondrial membrane potential.	204.62	555-60-2	C9H5ClN4_x000D_	ClC1=CC=CC(=C1)NN=C(C#N)C#N	74.1851	35.5705
Entospletinib (GS-9973)	Syk	Angiogenesis	Entospletinib (GS-9973) is an orally bioavailable, selective Syk inhibitor with IC50 of 7.7 nM in a cell-free assay and showed 13- to >1000-fold cellular selectivity for Syk over other kinases(including Jak2, ckit, Flt3, Ret, KDR) as assessed by target protein phosphorylation or functional response.	411.46	1229208-44-9	C23H21N7O	C1CN(CCO1)C2=CC=C(NC3=NC(=C[N]4C=CN=C34)C5=CC=C6C=N[NH]C6=C5)C=C2	74.7859	27.4491
Formononetin	Others	Others	Formononetin is a phytoestrogen from the root of Astragalus membranaceus and an O-methylated isoflavone.	268.26	485-72-3	C16H12O4	COC1=CC=C(C=C1)C2=COC3=C(C=CC(=C3)O)C2=O	69.125	20.1996
Uprosertib (GSK2141795)	Akt	PI3K/Akt/mTOR	Uprosertib (GSK2141795) is a selective, ATP-competitive, and orally bioavailable Akt inhibitor with IC50 of 180 nM, 328 nM, and 38 nM for Akt 1, 2 and 3, respectively. Phase 2.	429.25	1047634-65-0	C18H16Cl2F2N4O2	C[N]1N=CC(=C1C2=C(Cl)OC(=C2)C(=O)NC(CN)CC3=CC(=C(F)C=C3)F)Cl	3.19133	13.0812
9-ing-41	GSK-3	PI3K/Akt/mTOR	9-ING-41 is a potent inhibitor of glycogen synthase kinase-3 (GSK-3) with antitumor activity. 9-ING-41 induces apoptosis and cell cycle arrest at prophase by targeting centrosomes and microtubule-bound GSK3β.	404.35	1034895-42-5	C22H13FN2O5_x000D_	C[N]1C=C(C2=CC3=C(OCO3)C=C12)C4=C(C(=O)NC4=O)C5=COC6=C5C=C(F)C=C6	70.3834	58.2405
Itacitinib (INCB39110)	JAK	JAK/STAT	Itacitinib(INCB39110) is an orally bioavailable inhibitor of Janus-associated kinase 1 (JAK1) with potential antineoplastic activity.	553.51	1334298-90-6	C26H23F4N9O	FC1=C(C=CN=C1C(F)(F)F)C(=O)N2CCC(CC2)N3CC(CC#N)(C3)[N]4C=C(C=N4)C5=C6C=C[NH]C6=NC=N5	50.8674	33.3135
BFH772	VEGFR	Angiogenesis	BFH772 is a novel potent oral VEGFR2 inhibitor, targeting VEGFR2 kinase with IC50 of 3 nM.	439.39	890128-81-1	C23H16F3N3O3	OCC1=CC(=NC=N1)OC2=CC=C3C(=C2)C=CC=C3C(=O)NC4=CC(=CC=C4)C(F)(F)F	14.1743	13.0554
APY29	IRE1	ER stress & UPR	APY29 is a type I kinase inhibitor of <b>IRE1α</b> that binds to the ATP-binding site on IRE1α and inhibits its autophosphorylation (IC50 = 280 nM) and enhances its RNase function (EC50 = 460 nM).	332.36	1216665-49-4	C17H16N8_x000D_	C1CC1C2=CC(=N[NH]2)NC3=NC(=NC=C3)NC4=CC=C5N=C[NH]C5=C4	69.1823	19.5943
Chrysophanic Acid	EGFR,mTOR	Protein Tyrosine Kinase	Chrysophanic acid (Chrysophanol), a natural anthraquinone isolated from Dianella longifolia, is a EGFR/mTOR pathway inhibitor.	254.24	481-74-3	C15H10O4	CC1=CC2=C(C(=C1)O)C(=O)C3=C(O)C=CC=C3C2=O	46.5041	2.21253
Isorhamnetin	PXR	NF-κB	Isorhamnetin on experimental IBD via PXR-mediated up-regulation of xenobiotic metabolism and down-regulation of NF-κB signaling. Isorhamnetin is efficacious in protecting hepatocytes against oxidative stress by Nrf2 activation and in inducing the expressions of its downstream genes. Isorhamnetin may contribute to blockade of the host-destructive processes mediated by IL-6 and could be a highly ef…	316.262	480-19-3	C16H12O7	COC1=C(O)C=CC(=C1)C2=C(O)C(=O)C3=C(O2)C=C(O)C=C3O	61.729	24.6158
CID 2011756	Serine/threonin kina	Apoptosis	CID 2011756 is an inhibitor of <b>protein kinase D (PKD)</b> with IC50 values of 3.2, 0.6, and 0.7 μM for PKD1, PKD2, and PKD3, respectively.	396.87	638156-11-3	C22H21ClN2O3	ClC1=CC(=CC=C1)C2=CC=C(O2)C(=O)NC3=CC=C(CN4CCOCC4)C=C3	92.7532	7.68681
CH7057288	Trk receptor	Protein Tyrosine Kinase	CH7057288 is a potent and selective <b>TRK</b> inhibitor with IC50 values of 1.1 nM, 7.8 nM and 5.1 nM for TRKA, TRKB, and TRKC respectively.	569.67	2095616-82-1	C32H31N3O5S_x000D_	CC1=CC(=CC(=N1)C#CC2=CC3=C(C=C2)C4=C(O3)C(C)(C)C5=CC(=CC=C5C4=O)N[S](C)(=O)=O)C(=O)NC(C)(C)C	61.0766	21.5761
CGI1746	BTK	Angiogenesis	CGI1746 is a potent and highly selective small-molecule inhibitor of the Btk with IC50 of 1.9 nM.	579.69	910232-84-7	C34H37N5O4	CN1C=C(N=C(NC2=CC=C(C=C2)C(=O)N3CCOCC3)C1=O)C4=CC=CC(=C4C)NC(=O)C5=CC=C(C=C5)C(C)(C)C	66.3668	21.864
PF-00562271 Besylate	FAK	Angiogenesis	PF-00562271 is the benzenesulfonate salt of PF-562271, which is a potent, ATP-competitive, reversible inhibitor of FAK with IC50 of 1.5 nM, ~10-fold less potent for Pyk2 than FAK and >100-fold selectivity against other protein kinases, except for some CDKs. Phase 1.	665.66	939791-38-5	C27H26F3N7O6S2	CN(C1=C(CNC2=C(C=NC(=N2)NC3=CC=C4NC(=O)CC4=C3)C(F)(F)F)C=CC=N1)[S](C)(=O)=O.O[S](=O)(=O)C5=CC=CC=C5	48.0106	31.3448
IM156	AMPK	PI3K/Akt/mTOR	IM156, a metformin derivative, is a potent activator of AMPK that increases AMPK phosphorylation. IM156 blocks oxidative phosphorylation (OXPHOS) through the inhibition of complex I and increases apoptosis. IM156 ameliorates various types of fibrosis and inhibits tumors.	315.29	1422365-93-2	C13H16F3N5O_x000D_	FC(F)(F)OC1=CC=C(NC(=N)NC(=N)N2CCCC2)C=C1	46.1683	14.1663
4μ8C	Others	Others	4μ8C is a potent and selective IRE1 Rnase inhibitor with IC50 of 76 nM.	204.18	14003-96-4	C11H8O4	CC1=CC(=O)OC2=C(C=O)C(=CC=C12)O	62.2509	22.2287
Menadione	DNA/RNA Synthesis,phosphatase	Others	Menadione(Vitamin K3), a fat-soluble compound, is an inhibitor of Cdc25 phosphatase and mitochondrial DNA polymerase γ (pol γ), used as a nutritional supplement.	172.18	58-27-5	C11H8O2	CC1=CC(=O)C2=CC=CC=C2C1=O	23.3258	22.9528
WAY-322243	CLK-1	Cell Cycle	CLK-1 inhibitors	326.413	332939-32-9	C18H18N2O2S	CCCC(=O)NC(C1=CC=CS1)C2=CC=C3C=CC=NC3=C2O	68.0958	-1.62447
WAY-337530	CLK-1	Cell Cycle	active CLK-1 inhibitors; Glycosaminoglycan inhibitors;	334.412	332939-29-4	C21H22N2O2	CC(C)C1=CC=C(C=C1)C(NC(C)=O)C2=CC=C3C=CC=NC3=C2O	70.0633	53.4047
SR-3029	Casein Kinase	Metabolism	SR-3029 is a potent and selective casein kinase 1δ/1ε (CK1δ/ε) inhibitor with IC50 values of 44 and 260 nM for CK1δ and CK1ε, respectively.	480.45	1454585-06-8	C23H19F3N8O_x000D_	FC1=CC(=CC=C1)[N]2C=NC3=C2N=C(N=C3NCC4=NC5=C(F)C(=CC=C5[NH]4)F)N6CCOCC6	69.7737	25.6335
BMS-754807	c-Met,IGF-1R,Trk receptor	Protein Tyrosine Kinase	BMS-754807 is a potent and reversible inhibitor of IGF-1R/InsR with IC50 of 1.8 nM/1.7 nM in cell-free assays, less potent to Met, Aurora A/B, TrkA/B and Ron, and shows little activity to Flt3, Lck, MK2, PKA, PKC etc. Phase 2.	461.49	1001350-96-4	C23H24FN9O	CC1(CCCN1C2=N[N]3C=CC=C3C(=N2)NC4=N[NH]C(=C4)C5CC5)C(=O)NC6=CC=C(F)N=C6	67.4643	34.2297
Degrasyn (WP1130)	Bcr-Abl,DUB	Angiogenesis	Degrasyn (WP1130) is a selective deubiquitinase (DUB: USP5, UCH-L1, USP9x, USP14, and UCH37) inhibitor and also suppresses Bcr/Abl, also a JAK2 transducer (without affecting 20S proteasome) and activator of transcription (STAT).	384.27	856243-80-6	C19H18BrN3O	CCCC(NC(=O)/C(=C/C1=NC(=CC=C1)Br)C#N)C2=CC=CC=C2	38.9693	11.5647
BSJ-4-116	CDK	Cell Cycle	BSJ-4-116 is a specific degrader of cyclin-dependent kinase 12 (CDK12). BSJ-4-116 exhibits potent antiproliferative effects.	837.38	2519823-34-6	C40H49ClN8O8S_x000D_	CC(C)[S](=O)(=O)C1=C(NC2=NC(=NC=C2Cl)NC3CCCN(CCCCCCCNC(=O)COC4=C5C(=O)N(C6CCC(=O)NC6=O)C(=O)C5=CC=C4)C3)C=CC=C1	64.5661	41.9093
GW9508	GPR	Endocrinology & Hormones	GW9508 is a potent and selective agonist for FFA1 (GPR40) with pEC50 of 7.32, 100-fold selective against GPR120, stimulates insulin secretion in a glucose-sensitive manner.	347.41	885101-89-3	C22H21NO3	OC(=O)CCC1=CC=C(NCC2=CC=CC(=C2)OC3=CC=CC=C3)C=C1	27.2754	16.1825
NSC95397	CDK	Cell Cycle	NSC 95397 is a potent, selective <b>Cdc25</b> dual specificity phosphatase inhibitor with Ki of 32 nM, 96 nM, 40 nM for Cdc25A, Cdc25B and Cdc25C, respectively. NSC 95397 has IC50 of 22.3 nM, 56.9 nM and 125 nM for human Cdc25A, human Cdc25C and Cdc25B, respectively. NSC 95397 inhibits <b>mitogen-activated protein kinase phosphatase-1 (MKP-1)</b> and suppresses proliferation and induces apoptosis…	310.39	93718-83-3	C14H14O4S2_x000D_	OCCSC1=C(SCCO)C(=O)C2=C(C=CC=C2)C1=O	59.6431	16.46
AZ 960	JAK	JAK/STAT	AZ 960 is a novel ATP competitive JAK2 inhibitor with IC50 and Ki of <3 nM and 0.45 nM, 3-fold selectivity of AZ960 for JAK2 over JAK3.	354.36	905586-69-8	C18H16F2N6	CC(NC1=NC(=C(F)C=C1C#N)NC2=N[NH]C(=C2)C)C3=CC=C(F)C=C3	65.2478	32.9075
Erlotinib	EGFR	Protein Tyrosine Kinase	Erlotinib is an EGFR inhibitor with IC50 of 2 nM, >1000-fold more sensitive for EGFR than human c-Src or v-Abl.	393.44	183321-74-6	C22H23N3O4	COCCOC1=C(OCCOC)C=C2C(=NC=NC2=C1)NC3=CC=CC(=C3)C#C	-15.7745	9.36936
PD0166285	Wee1	Cell Cycle	PD0166285 is a potent Wee1 and Chk1 inhibitor with activity at nanomolar concentrations (IC50=24 nM for Wee1 and 72 nM for Myt1). PD0166285 is also a novel G2 checkpoint abrogator.	512.43	185039-89-8	C26H27Cl2N5O2	CCN(CC)CCOC1=CC=C(NC2=NC3=C(C=N2)C=C(C(=O)N3C)C4=C(Cl)C=CC=C4Cl)C=C1	7.6291	11.6657
PF-3758309	PAK	Cytoskeletal Signaling	PF-03758309 is a potent, ATP-competitive, pyrrolopyrazole inhibitor of PAK4 with IC50 of 1.3 nM.	490.62	898044-15-0	C25H30N8OS	CN(C)CC(NC(=O)N1CC2=C([NH]N=C2NC3=NC(=NC4=C3SC=C4)C)C1(C)C)C5=CC=CC=C5	58.5647	71.2859
EGFR Inhibitor	EGFR	Protein Tyrosine Kinase	EGFR inhibitor, a cell permeable, 4,6-disubstituted pyrimidine compound, is a highly selevtive inhibitor of <b>EGFR kinase</b> with IC50 of 21 nM. EGFR inhibitor directly depolymerizes <b>microtubules</b> and is used as a chemical probe to investigate both the EGFR pathway and microtubule dynamics.	413.4	879127-07-8	C21H18F3N5O_x000D_	FC(F)(F)C1=CC(=CC=C1)NC2=CC(=NC=N2)NC3=CC(=CC=C3)NC(=O)C4CC4	76.9488	26.5641
WAY-644841	IRAK4,AR	Immunology & Inflammation	inhibition of AR dimerization; inhibitors of IRAK4;	235.305	850021-27-1	C11H13N3OS	NC1=CC2=C(C=C1)N=C(S2)N3CCOCC3	39.0876	9.13075
Pictilisib (GDC-0941)	PI3K	PI3K/Akt/mTOR	Pictilisib (GDC-0941) is a potent inhibitor of PI3Kα/δ with IC50 of 3 nM in cell-free assays, with modest selectivity against p110β (11-fold) and p110γ (25-fold). Phase 2.	513.64	957054-30-7	C23H27N7O3S2	C[S](=O)(=O)N1CCN(CC1)CC2=CC3=NC(=NC(=C3S2)N4CCOCC4)C5=CC=CC6=C5C=N[NH]6	54.0494	7.29282
JNJ-38877605	c-Met	Protein Tyrosine Kinase	JNJ-38877605 is an ATP-competitive inhibitor of c-Met with IC50 of 4 nM, 600-fold selective for c-Met than 200 other tyrosine and serine-threonine kinases. Phase 1.	377.35	943540-75-8	C19H13F2N7	C[N]1C=C(C=N1)C2=N[N]3C(=NN=C3C(F)(F)C4=CC5=C(C=C4)N=CC=C5)C=C2	64.409	-5.39916
RO495	JAK	JAK/STAT & Epigenetics & Angiogenesis & Stem Cells & Wnt	RO495 (CS-2667) is a potent inhibitor of <b>Non-receptor tyrosine-protein kinase 2 (TYK2)</b>.	389.24	1258296-60-4	C17H14Cl2N6O_x000D_	CC1=CC(=NC(=N1)N)NC2=NC=CC(=C2)NC(=O)C3=C(Cl)C=CC=C3Cl	56.8103	21.6796
Ro-3306	CDK	Cell Cycle	RO-3306 is an ATP-competitive, and selective CDK1 inhibitor with Ki of 20 nM, >15-fold selectivity against a diverse panel of human kinases.	351.45	872573-93-8	C18H13N3OS2	O=C1N=C(NCC2=CC=CS2)S\C1=C/C3=CC=C4N=CC=CC4=C3	0.903656	15.9701
kira6	Others	Others	kira6 is a potent type II IRE1α kinase inhibitor with an IC50 of 0.6 μM. It dose-dependently inhibits IRE1α(WT) kinase activity, XBP1 RNA cleavage, Ins2 RNA cleavage and oligomerization.	518.53	1589527-65-0	C28H25F3N6O	CC(C)(C)C1=NC(=C2[N]1C=CN=C2N)C3=CC=C(NC(=O)NC4=CC=CC(=C4)C(F)(F)F)C5=C3C=CC=C5	47.6352	16.5945
Tivantinib (ARQ 197)	c-Met	Protein Tyrosine Kinase	Tivantinib (ARQ 197) is the first non-ATP-competitive c-Met inhibitor with Ki of 0.355 μM in a cell-free assay, little activity to Ron, and no inhibition to EGFR, InsR, PDGFRα or FGFR1/4. Phase 3.	369.42	905854-02-6	C23H19N3O2	O=C1NC(=O)C(C1C2=C[NH]C3=C2C=CC=C3)C4=C[N]5CCCC6=CC=CC4=C56	71.515	13.9622
CUDC-907	HDAC,PI3K	Cytoskeletal Signaling	CUDC-907 is a dual PI3K and HDAC inhibitor for PI3Kα and HDAC1/2/3/10 with IC50 of 19 nM and 1.7 nM/5 nM/1.8 nM/2.8 nM, respectively. Phase 1.	508.55	1339928-25-4	C23H24N8O4S	COC1=CC=C(C=N1)C2=NC3=C(SC(=C3)CN(C)C4=NC=C(C=N4)C(=O)NO)C(=N2)N5CCOCC5	49.6423	18.7167
PLX-4720	Raf	MAPK	PLX4720 is a potent and selective inhibitor of B-RafV600E with IC50 of 13 nM in a cell-free assay, equally potent to c-Raf-1(Y340D and Y341D mutations), 10-fold selectivity for B-RafV600E than wild-type B-Raf.	413.83	918505-84-7	C17H14ClF2N3O3S	CCC[S](=O)(=O)NC1=CC=C(F)C(=C1F)C(=O)C2=C[NH]C3=NC=C(Cl)C=C23	81.5253	9.66402
WAY-301503	CDK2	Cell Cycle	stop-codon readthrough	315.304	313530-30-2	C14H9N3O4S	[O-][N+](=O)C1=C(C=CC=C1)C2=CC=C(O2)\C=C\3SC(=N)NC3=O	44.4199	19.6994
PHA-793887	CDK	Cell Cycle	PHA-793887 is a novel and potent inhibitor of CDK2, CDK5 and CDK7 with IC50 of 8 nM, 5 nM and 10 nM. It is greater than 6-fold more selective for CDK2, 5, and 7 than CDK1, 4, and 9. Phase 1.	361.48	718630-59-2	C19H31N5O2	CC(C)CC(=O)NC1=N[NH]C2=C1CN(C(=O)C3CCN(C)CC3)C2(C)C	40.6396	42.0374
LDN-193189 2HCl	TGF-beta/Smad	TGF-beta/Smad	LDN193189 HCl is the hydrochloride salt of LDN193189, which is a selective BMP signaling inhibitor, and inhibits the transcriptional activity of the BMP type I receptors ALK2 and ALK3 with IC50 of 5 nM and 30 nM in C2C12 cell lines, respectively, 200-fold selectivity for BMP versus TGF-β.	479.4	1435934-00-1	C25H23ClN6	Cl.C1CN(CCN1)C2=CC=C(C=C2)C3=C[N]4N=CC(=C4N=C3)C5=CC=NC6=C5C=CC=C6	18.5808	-27.4581
U0126-EtOH	MEK	MAPK	U0126-EtOH is a highly selective inhibitor of MEK1/2 with IC50 of 0.07 μM/0.06 μM in cell-free assays, 100-fold higher affinity for ΔN3-S218E/S222D MEK than PD98059.	426.56	1173097-76-1	C20H22N6OS2	CCO.N\C(SC1=CC=CC=C1N)=C(C#N)\C(C#N)=C(N)/SC2=CC=CC=C2N	57.3202	-2.70116
WAY-296818	casein kinase 1	Metabolism & Stem Cells & Wnt	CK1d inhibitor; casein kinase 1 inhibitor;	312.386	349438-77-3	C17H16N2O2S	COC1=C(CC(=O)NC2=NC3=CC=C(C)C=C3S2)C=CC=C1	31.2852	14.186
ETC-1002	AMPK,LDL	PI3K/Akt/mTOR	ETC-1002,also known as Bempedoic acid, is an orally available, once-daily LDL-C lowering small molecule designed to lower elevated levels of LDL-C and to avoid side effects associated with existing LDL-C lowering therapies.ETC-1002 is an activator of hepatic AMP-activated protein kinase (AMPK). It has potent inhibitory activity against hepatic ATP-citrate lyase(IC50=29 uM).	344.49	738606-46-7	C19H36O5	CC(C)(CCCCCC(O)CCCCCC(C)(C)C(O)=O)C(O)=O	-7.46479	5.23262
IPI-549	PI3K	PI3K/Akt/mTOR	IPI-549 is a potent inhibitor of PI3K-γ with >100-fold selectivity over other lipid and protein kinases. The biochemical IC50 for PI3K-γ is 16 nM.	528.56	1693758-51-8	C30H24N8O2	CC(NC(=O)C1=C2N=CC=C[N]2N=C1N)C3=CC4=CC=CC(=C4C(=O)N3C5=CC=CC=C5)C#CC6=C[N](C)N=C6	21.2645	-16.8999
GW441756	Trk receptor	Protein Tyrosine Kinase	GW441756 is a potent, selective inhibitor of TrkA with IC50 of 2 nM, with very little activity to c-Raf1 and CDK2.	275.3	504433-23-2	C17H13N3O	C[N]1C=C(C=C2C(=O)NC3=CC=CN=C23)C4=C1C=CC=C4	67.1332	6.50436
AG-1478 (Tyrphostin AG-1478)	EGFR	Protein Tyrosine Kinase	AG-1478 (Tyrphostin AG-1478) is a selective EGFR inhibitor with IC50 of 3 nM in cell-free assays, almost no activity on HER2-Neu, PDGFR, Trk, Bcr-Abl and InsR.	315.75	153436-53-4	C16H14ClN3O2	COC1=C(OC)C=C2C(=NC=NC2=C1)NC3=CC(=CC=C3)Cl	39.4887	-0.68411
X-376	ALK	Angiogenesis	X-376 is an ALK inhibitor and potentially useful in non-small cell lung cancer.	547.41	1365267-27-1	C25H25Cl2FN6O3_x000D_	CC(OC1=CC(=NN=C1N)C(=O)NC2=CC=C(C=C2)C(=O)N3CCN(C)CC3)C4=C(Cl)C=CC(=C4Cl)F	45.802	27.4329
Everolimus (RAD001)	mTOR	PI3K/Akt/mTOR	Everolimus (RAD001) is an mTOR inhibitor of FKBP12 with IC50 of 1.6-2.4 nM in a cell-free assay.	958.22	159351-69-6	C53H83NO14	COC1CC(CCC1OCCO)CC(C)C2CC(=O)C(C)\C=C(C)\C(O)C(OC)C(=O)C(C)CC(C)/C=C/C=C/C=C(C)/C(CC3CCC(C)C(O)(O3)C(=O)C(=O)N4CCCCC4C(=O)O2)OC	61.6452	29.5431
BMS-536924	IGF-1R	Protein Tyrosine Kinase	BMS-536924 is an ATP-competitive IGF-1R/IR inhibitor with IC50 of 100 nM/73 nM, modest activity for Mek, Fak, and Lck with very little activity for Akt1, MAPK1/2.	479.96	468740-43-4	C25H26ClN5O3	CC1=C2N=C([NH]C2=CC(=C1)N3CCOCC3)C4=C(NCC(O)C5=CC=CC(=C5)Cl)C=CNC4=O	65.7841	5.13189
Diosmetin	P450 (e.g. CYP17)	Metabolism	Diosmetin is a bioflavonoid found in spearmint, oregano, and many other plants.	300.26	520-34-3	C16H12O6	COC1=CC=C(C=C1O)C2=CC(=O)C3=C(O)C=C(O)C=C3O2	44.7422	10.9438
BAY-293	Rho	Cell Cycle	BAY-293 selectively inhibits the KRAS-SOS1 interaction with an IC50 of 21 nM.	448.58	2244904-70-7	C25H28N4O2S_x000D_	CNCC1=C(C=CC=C1)C2=CSC(=C2)C(C)NC3=NC(=NC4=CC(=C(OC)C=C34)OC)C	25.3674	3.86413
WAY-641918	TAO kinase	others	TAO kinase inhibitors	400.47	850467-77-5	C25H24N2O3	O=C(CNC(=O)C1=CC=C(OC2=CC=CC=C2)C=C1)NC3CCCC4=C3C=CC=C4	65.7296	25.85
Afatinib (BIBW2992)	EGFR,HER2	Protein Tyrosine Kinase	Afatinib (BIBW2992) inhibits EGFR/ErbB irreversibly in vitro with IC50 of 0.5, 0.4, 10, 14, 1 nM for EGFRwt, EGFR L858R , EGFR L858R/T790M ErbB2 (HER2) and ErbB4 (HER4), respectively.	485.94	439081-18-2	C24H25ClFN5O3	CN(C)C/C=C/C(=O)NC1=CC2=C(NC3=CC=C(F)C(=C3)Cl)N=CN=C2C=C1OC4CCOC4	64.999	-18.6358
Hispidulin	Pim	JAK/STAT	Hispidulin (Dinatin), an active natrual ingredient in a number of traditional Chinese medicinal herbs, exhibits inhibitory activity against the oncogenic protein kinase Pim-1 with IC50 of 2.71 μM. Hispidulin induces apoptosis through mitochondrial dysfunction and inhibition of P13k/Akt signalling pathway in HepG2 cancer cells. Hispidulin exerts anti-osteoporotic and bone resorption attenuating ef…	300.26	1447-88-7	C16H12O6_x000D_	COC1=C(O)C=C2OC(=CC(=O)C2=C1O)C3=CC=C(O)C=C3	46.3521	28.852
Paroxetine HCl	AChR,5-HT Receptor	Neuronal Signaling	Paroxetine HCl is an antidepressant drug of the SSRI type.	365.83	78246-49-8	C19H21ClFNO3	Cl.FC1=CC=C(C=C1)C2CCNCC2COC3=CC4=C(OCO4)C=C3	12.8709	4.85668
BX-912	PDK	PI3K/Akt/mTOR	BX912 is a potent and specific PDK1 inhibitor with IC50 of 12 nM, 9- and 105- fold greater selectivity for PDK1 than PKA and PKC in cell-free assays, respectively. In comparison to GSK3β, selectivity for PDK1 is 600-fold.	471.35	702674-56-4	C20H23BrN8O	BrC1=CN=C(NC2=CC(=CC=C2)NC(=O)N3CCCC3)N=C1NCCC4=CN=C[NH]4	83.3202	26.4859
LY2608204	Others	Others	LY2608204 activates glucokinase (GK) with EC50 of 42 nM. Phase 2.	559.81	1234703-40-2	C28H37N3O3S3	O=C(NC1=NC=C(SCCN2CCCC2)S1)C3(CC3C4CCCCC4)C5=CC=C(C=C5)[S](=O)(=O)C6CC6	48.3928	5.70493
DDR1-IN-1	Others	Others	DDR1-IN-1 is a potent and selective discoidin domain receptor 1 (DDR1) receptor tyrosine kinase inhibitor with IC50 of 105 nM, about 3-fold selectivity over DDR2.	552.59	1449685-96-4	C30H31F3N4O3	CCN1CCN(CC1)CC2=CC=C(C=C2C(F)(F)F)C(=O)NC3=CC(=C(C)C=C3)OC4=CC=C5NC(=O)CC5=C4	23.3451	22.4233
GSK461364	PLK	Cell Cycle	GSK461364 inhibits purified Plk1 with Ki of 2.2 nM in a cell-free assay. It is more than 1000-fold selective against Plk2/3. Phase 1.	543.6	929095-18-1	C27H28F3N5O2S	CC(OC1=C(SC(=C1)[N]2C=NC3=C2C=C(CN4CCN(C)CC4)C=C3)C(N)=O)C5=CC=CC=C5C(F)(F)F	38.5615	7.13964
TBK1/IKKε-IN-1(compound 1)	IκB/IKK	NF-κB	TBK1/IKKε-IN-1 (compound 1) is a dual inhibitor of <b>TANK-binding kinase 1 (TBK1)</b> and <b> IκB kinase-ε (IKKε/IKK-i)</b> with IC50 of 1.0 nM and 5.6 nM for TBK1 and IKKε, respectively. TBK1/IKKε inhibition enhances response to PD-1 blockade, which effectively predicts tumor response in vivo.	513.59	1893397-65-3	C28H31N7O3_x000D_	N#CC1=CC(=CC=C1OC2CCOCC2)C3=NC=NC(=N3)NC4=CC=C(C=C4)N5CCN(CC5)C6COC6	79.0204	49.471
Motesanib Diphosphate (AMG-706)	VEGFR,PDGFR,c-Kit	Protein Tyrosine Kinase	Motesanib Diphosphate (AMG-706) is a potent ATP-competitive inhibitor of VEGFR1/2/3 with IC50 of 2 nM/3 nM/6 nM, respectively similar activity against Kit, ~10-fold more selective for VEGFR than PDGFR and Ret. Phase 3.	569.44	857876-30-3	C22H29N5O9P2	CC1(C)CNC2=CC(=CC=C12)NC(=O)C3=C(NCC4=CC=NC=C4)N=CC=C3.O[P](O)(O)=O.O[P](O)(O)=O	56.6517	-7.19782
Piperlongumine	ROS,CRM1	Immunology & Inflammation	Piperlongumine, a natural alkaloid from Piper longum L., increases the level of reactive oxygen species (ROS) and selectively kills cancer cells. It is a direct TrxR1 inhibitor with suppressive activity against gastric cancer and a novel inhibitor of CRM1 also an inhibitor of PI3K/Akt/mTOR in human breast cancer cells.	317.34	20069-09-4	C17H19NO5	COC1=CC(=CC(=C1OC)OC)/C=C/C(=O)N2CCC=CC2=O	53.5944	29.226
WAY-631545	others	others	protein kinase inhibitor; protein kinase inhibitor; protein kinase inhibitor;	264.706	681260-56-0	C12H6ClFN2S	FC1=CC=C(C=C1)C2=CC3=C(S2)C(=NC=N3)Cl	16.2045	12.7067
Crizotinib hydrochloride	c-Met	Protein Tyrosine Kinase	Crizotinib (PF-02341066) hydrochloride (Xalkori) inhibits tyrosine phosphorylation of <b>c-Met</b> and nucleophosmin (NPM)-<b>anaplastic lymphoma kinase (ALK)</b> with IC50 of of 11 nM and 24 nM in cell-based assays, respectively. Crizotinib hydrochloride is also a potent <b>ROS1</b> inhibitor with Ki less than 0.025 nM. Crizotinib induces <b>autophagy</b> through inhibition of the STAT3 pathway …	486.8	1415560-69-8	C21H23Cl3FN5O_x000D_	Cl.CC(OC1=C(N)N=CC(=C1)C2=C[N](N=C2)C3CCNCC3)C4=C(Cl)C=CC(=C4Cl)F	62.0847	28.1885
PP1	Src	Angiogenesis	PP1 is a potent and selective Src inhibitor for Lck/Fyn with IC50 of 5 nM/ 6 nM.	281.36	172889-26-8	C16H19N5	CC1=CC=C(C=C1)C2=N[N](C3=NC=NC(=C23)N)C(C)(C)C	59.9013	30.7264
NSC12	FGFR	Angiogenesis	NSC12 is an orally available pan-FGF trap able to inhibit FGF2/FGFR interaction and endowed with promising antitumor activity.	484.52	102586-30-1	C24H34F6O3	CC12CCC3C(CC=C4CC(O)CCC34C)C1CCC2C(O)CC(O)(C(F)(F)F)C(F)(F)F	27.4009	13.6125
5-Iodotubercidin	Adenosine Receptor	GPCR & G Protein	5-Iodotubercidin is a potent adenosine kinase inhibitor with IC50 of 26 nM. It inhibits nucleoside transporter, CK1, insulin receptor tyrosine kinase, phosphorylase kinase, PKA, CK2 and PKC.	392.15	24386-93-4	C11H13IN4O4	NC1=NC=NC2=C1C(=C[N]2C3OC(CO)C(O)C3O)I	67.878	42.0547
HG-9-91-01	SIK	Immunology & Inflammation	HG-9-91-01 (SIK inhibitor 1) is a potent and highly selective inhibitor of <b>salt-inducible kinase (SIK)</b> with IC50 of 0.92 nM, 6.6 nM and 9.6 nM for SIK1, SIK2 and SIK3, respectively.	567.68	1456858-58-4	C32H37N7O3_x000D_	COC1=CC=C(N(C(=O)NC2=C(C)C=CC=C2C)C3=CC(=NC=N3)NC4=CC=C(C=C4)N5CCN(C)CC5)C(=C1)OC	11.7178	24.1746
LY294002	Autophagy,PI3K	PI3K/Akt/mTOR	LY294002 is the first synthetic molecule known to inhibit PI3Kα/δ/β with IC50 of 0.5 μM/0.57 μM/0.97 μM in cell-free assays, respectively more stable in solution than Wortmannin, and also blocks autophagosome formation.	307.34	154447-36-6	C19H17NO3	O=C1C=C(OC2=C(C=CC=C12)C3=CC=CC=C3)N4CCOCC4	43.8021	6.71269
Tivozanib (AV-951)	c-Kit,PDGFR,VEGFR	Protein Tyrosine Kinase	Tivozanib (AV-951) is a potent and selective VEGFR inhibitor for VEGFR1/2/3 with IC50 of 30 nM/6.5 nM/15 nM, and also inhibits PDGFR and c-Kit, low activity observed against FGFR-1, Flt3, c-Met, EGFR and IGF-1R. Phase 3.	454.86	475108-18-0	C22H19ClN4O5	COC1=CC2=C(C=C1OC)C(=CC=N2)OC3=CC=C(NC(=O)NC4=NOC(=C4)C)C(=C3)Cl	60.0821	21.9613
Larotrectinib (LOXO-101) sulfate	Trk receptor	Protein Tyrosine Kinase	Larotrectinib (LOXO-101) sulfate is an oral potent and selective ATP-competitive inhibitor of tropomyosin receptor kinases (TRK).	526.51	1223405-08-0	C21H24F2N6O6S	OC1CCN(C1)C(=O)NC2=C3N=C(C=C[N]3N=C2)N4CCCC4C5=CC(=CC=C5F)F.O[S](O)(=O)=O	0.608658	15.2043
Miransertib (ARQ 092) HCl	Akt	PI3K/Akt/mTOR	ARQ 092 is a novel, orally bioavailable and selective AKT pathway inhibitor exhibiting a manageable safety profile among patients with advanced solid tumors.	468.98	1313883-00-9	C27H25ClN6	Cl.NC1=NC=CC=C1C2=NC3=CC=C(N=C3[N]2C4=CC=C(C=C4)C5(N)CCC5)C6=CC=CC=C6	24.7255	14.3637
WAY-632323	Casein kinase 1δ	Metabolism	Casein kinase 1δ inhibitors	365.475	782457-22-1	C18H15N5S2	CC1=CC(=CC=C1)[N]2N=NN=C2SCC3=CSC(=N3)C4=CC=CC=C4	7.69452	5.43534
PYR-41	E1 Activating	Ubiquitin	PYR-41 is the first cell-permeable inhibitor of ubiquitin-activating enzyme E1, with no activity at E2.	371.3	418805-02-4	C17H13N3O7	CCOC(=O)C1=CC=C(C=C1)N2NC(=O)C(=C/C3=CC=C(O3)[N+]([O-])=O)/C2=O	56.8541	13.9061
Ro3280	PLK	Cell Cycle	RO3280 is a potent, highly selective inhibitor of Polo-like kinase 1 (PLK1) with IC50 of 3?nM.	543.61	1062243-51-9	C27H35F2N7O3	COC1=C(NC2=NC3=C(C=N2)N(C)C(=O)C(F)(F)CN3C4CCCC4)C=CC(=C1)C(=O)NC5CCN(C)CC5	39.8246	26.9472
CHIR-124	Chk	Cell Cycle	CHIR-124 is a novel and potent Chk1 inhibitor with IC50 of 0.3 nM in a cell-free assay. It shows 2,000-fold selectivity against Chk2, 500- to 5,000-fold less activity against CDK2/4 and Cdc2.	419.91	405168-58-3	C23H22ClN5O	ClC1=CC2=C(NC(=O)C(=C2NC3CN4CCC3CC4)C5=NC6=C([NH]5)C=CC=C6)C=C1	52.7054	13.0991
T56-LIMKi	Others	Others		389.33	924473-59-6	C19H14F3N3O3	CC1=NOC(=C1)C(=O)NC2=CC=CC(=C2)C(=O)NC3=CC=CC(=C3)C(F)(F)F	38.4461	31.2771
NVP-ADW742	IGF-1R	Protein Tyrosine Kinase	NVP-ADW742 is an IGF-1R inhibitor with IC50 of 0.17 μM, >16-fold more potent against IGF-1R than InsR little activity to HER2, PDGFR, VEGFR-2, Bcr-Abl and c-Kit.	453.58	475488-23-4	C28H31N5O	NC1=NC=NC2=C1C(=C[N]2C3CC(C3)CN4CCCC4)C5=CC(=CC=C5)OCC6=CC=CC=C6	32.8794	9.49682
RO5126766 (CH5126766)	Raf	MAPK	RO5126766 (CH5126766) is a dual RAF/MEK inhibitor with IC50 of 8.2 nM,19 nM, 56 nM, and 160 nM for BRAF V600E, BRAF, CRAF, and MEK1, respectively. Phase 1.	471.46	946128-88-7	C21H18FN5O5S	CN[S](=O)(=O)NC1=NC=CC(=C1F)CC2=C(C)C3=CC=C(OC4=NC=CC=N4)C=C3OC2=O	63.85	17.9721
AT9283	Aurora Kinase,Bcr-Abl,JAK	JAK/STAT	AT9283 is a potent JAK2/3 inhibitor with IC50 of 1.2 nM/1.1 nM in cell-free assays also potent to Aurora A/B, Abl(T315I). Phase 2.	381.43	896466-04-9	C19H23N7O2	O=C(NC1CC1)NC2=C[NH]N=C2C3=NC4=CC(=CC=C4[NH]3)CN5CCOCC5	54.46	46.2706
THZ2	CDK	Cell Cycle	THZ2, a THZ1 analog, is a selective inhibitor of <b>CDK7</b> with IC50 of 13.9 nM. THZ2 efficiently suppresses the clonogenic growth of TNBC cells with IC50 of ~10 nM.	566.05	1604810-84-5	C31H28ClN7O2_x000D_	CN(C)C\C=C\C(=O)NC1=CC=CC(=C1)C(=O)NC2=CC=CC(=C2)NC3=NC=C(Cl)C(=N3)C4=C[NH]C5=CC=CC=C45	50.4442	46.7981
RK 24466	Src	Angiogenesis	RK-24466 (KIN 001-51) is a potent and selective inhibitor of Lck that inhibits two constructs of the human lck kinase, lck (64-509) and lckcd with IC50 of < 0.001 μM and 0.002 μM, respectively.	370.45	213743-31-8	C23H22N4O_x000D_	NC1=C2C(=C[N](C3CCCC3)C2=NC=N1)C4=CC=C(OC5=CC=CC=C5)C=C4	79.7869	15.3088
Tyrphostin AG 1296	c-Kit,PDGFR	Protein Tyrosine Kinase	Tyrphostin AG 1296 is an inhibitor of PDGFR with IC50 of 0.3-0.5 μM, no activity to EGFR.	266.29	146535-11-7	C16H14N2O2	COC1=CC2=NC=C(N=C2C=C1OC)C3=CC=CC=C3	106.625	85.9612
GSK2982772	TNF-alpha,NF-κB	Apoptosis	GSK2982772 is an ATP competitive receptor-interacting protein-1 (RIP1) kinase inhibitor with the IC50 value of 1 nM. It has exquisite kinase specificity and excellent activity in blocking many TNF-dependent cellular responses.	377.4	1622848-92-3	C20H19N5O3	CN1C(=O)C(COC2=CC=CC=C12)NC(=O)C3=N[NH]C(=N3)CC4=CC=CC=C4	21.7383	12.6625
Genz-123346 free base	Others	Others	Genz-123346 is an inhibitor of GL1 synthase that blocks the conversion of ceramide to GL1, the first step in the biosynthesis of gangliosides and other glycosphingolipids.	418.57	491833-30-8	C24H38N2O4_x000D_	CCCCCCCCC(=O)NC(CN1CCCC1)C(O)C2=CC=C3OCCOC3=C2	6.9657	20.6362
JNK Inhibitor IX	JNK	MAPK	JNK inhibitor IX is a selective and potent JNK inhibitor with pIC50 of 6.5 and 6.7 for JNK2 and JNK3, respectively.	332.42	312917-14-9	C20H16N2OS	O=C(NC1=C(C#N)C2=C(CCCC2)S1)C3=CC=CC4=C3C=CC=C4	33.3928	20.6909
Taselisib (GDC 0032)	PI3K	PI3K/Akt/mTOR	Taselisib (GDC 0032) is a potent, next-generation β isoform-sparing PI3K inhibitor targeting PI3Kα/δ/γ with Ki of 0.29 nM/0.12 nM/0.97nM, >10 fold selective over PI3Kβ.	460.53	1282512-48-4	C24H28N8O2	CC(C)[N]1N=C(C)N=C1C2=C[N]3CCOC4=CC(=CC=C4C3=N2)C5=C[N](N=C5)C(C)(C)C(N)=O	57.0189	10.9934
BGT226 (NVP-BGT226)	mTOR,PI3K	PI3K/Akt/mTOR	BGT226 (NVP-BGT226) is a novel class I PI3K/mTOR inhibitor for PI3Kα/β/γ with IC50 of 4 nM/63 nM/38 nM. Phase 1/2.	650.6	1245537-68-1	C32H29F3N6O6	COC1=CC=C(C=N1)C2=CC=C3N=CC4=C(N(C(=O)N4C)C5=CC=C(N6CCNCC6)C(=C5)C(F)(F)F)C3=C2.OC(=O)\C=C/C(O)=O	35.3421	85.7548
B-Raf inhibitor 1 (Compound 13) dihydrochloride	Raf	MAPK	B-Raf inhibitor 1 (Compound 13) is a type IIA <b>Raf</b> inhibitor which bind to the DFG-out conformation with ki of 1 nM,1 nM,and 0.3 nM for B-Raf(WT), B-Raf(V600E) and C-Raf, respectively.	551.86	1191385-19-9	C26H21Cl3N8_x000D_	Cl.Cl.CC1=C(NC2=NC=CC=C2C3=C4N=C[NH]C4=NC=N3)C5=CC=NC(=C5C=C1)NC6=CC=C(Cl)C=C6	32.2081	7.21993
IITZ-01	Autophagy	Autophagy	IITZ-01 is a potent <b>autophagy</b> inhibitor, enhancing autophagosome accumulation but inhibiting autophagosomal degradation by impairing lysosomal function.	482.51	1807988-47-1	C26H23FN8O	FC1=CC=C(NC2=NC(=NC(=N2)N3CCOCC3)NC4=CC=C(C=C4)C5=NC6=C([NH]5)C=CC=C6)C=C1	46.682	14.2032
CYC116	Aurora Kinase,VEGFR	Cell Cycle	CYC116 is a potent inhibitor of Aurora A/B with Ki of 8.0 nM/9.2 nM, is less potent to VEGFR2 (Ki of 44 nM), with 50-fold greater potency than CDKs, not active against PKA, Akt/PKB, PKC, no effect on GSK-3α/β, CK2, Plk1 and SAPK2A. Phase 1.	368.46	693228-63-6	C18H20N6OS	CC1=C(SC(=N1)N)C2=NC(=NC=C2)NC3=CC=C(C=C3)N4CCOCC4	95.7546	16.8739
CVT-313	CDK	Autophagy	CVT-313 is a potent CDK2 inhibitor with an IC50 of 0.5 microM in vitro. It has no effect on other, nonrelated ATP-dependent serine/threonine kinases.	400.47	199986-75-9	C20H28N6O3_x000D_	COC1=CC=C(CNC2=NC(=NC3=C2N=C[N]3C(C)C)N(CCO)CCO)C=C1	62.2926	15.2002
Autophinib	Autophagy,PI3K	Autophagy	Autophinib is a potent autophagy inhibitor with a novel chemotype with IC50 values of 90 and 40 nM for autophagy in starvation induced autophagy assay and rapamycin induced autophagy assay. The IC50 value for Vps34 is 19 nM in vitro.	346.73	1644443-47-9	C14H11ClN6O3	CC1=CC(=N[NH]1)NC2=CC(=NC(=N2)OC3=CC=C(C=C3)[N+]([O-])=O)Cl	66.015	8.46
AZD4547	FGFR	Angiogenesis	AZD4547 is a novel selective FGFR inhibitor targeting FGFR1/2/3 with IC50 of 0.2 nM/2.5 nM/1.8 nM in cell-free assays, weaker activity against FGFR4, VEGFR2(KDR), and little activity observed against IGFR, CDK2, and p38. Phase 2/3.	463.57	1035270-39-3	C26H33N5O3	COC1=CC(=CC(=C1)OC)CCC2=CC(=N[NH]2)NC(=O)C3=CC=C(C=C3)N4CC(C)NC(C)C4	37.4421	-4.76278
WAY-339696	EGFR-T790M/L858R	Protein Tyrosine Kinase,Angiogenesis,JAK/STAT	inhibitors for EGFR-T790M/L858R	359.174	333419-97-9	C16H11BrN2O3	OC1=C(C(=O)NC2=CC=CC(=C2)Br)C(=O)NC3=C1C=CC=C3	69.0749	-1.17658
PRT-060318 2HCl	Syk	Angiogenesis	PRT-060318 (PRT318) is a novel selective inhibitor of the Syk tyrosine kinase with an IC50 of 4 nM, as an approach to HIT treatment.	413.34	1194961-19-7 (free base)	C18H27Cl3N6O	Cl.Cl.CC1=CC(=CC=C1)NC2=C(C=NC(=N2)NC3CCCCC3N)C(N)=O	82.9599	58.3281
WAY-296817	casein kinase 1	Metabolism & Stem Cells & Wnt	CK1d inhibitor; casein kinase 1 inhibitor;	328.386	349438-74-0	C17H16N2O3S	COC1=CC=C2N=C(NC(=O)CC3=C(OC)C=CC=C3)SC2=C1	39.0637	9.37058
Gambogenic acid	Others	apoptosis	Gambogenic acid induces mitochondria-dependent apoptosis and increases P53 expression in human gastric carcinoma cell line. Gambogenic acid suppresses breast cancer MDA-MB-231 cell growth by mediating apoptosis through death receptor and mitochondrial pathways in vivo and in vitro. Gambogenic acid can cause aberrant autophagy to induce cell death and may suggest the potential application of Gambo…	630.767	173932-75-7	C38H46O8	CC(C)=CCC/C(C)=C/CC1=C(O)C2=C(OC34C5CC(C=C3C2=O)C(=O)C4(C\C=C(\C)C(O)=O)OC5(C)C)C(=C1O)CC=C(C)C	18.6878	3.02191
LYN-1604	Hedgehog/Smoothened	Stem Cells & Wnt	LYN-1604 is a potential ULK1 agonist with IC50 of 1.66 μM against MDA-MB-231 cells and it binds to wild-type ULK1 with a binding affinity in the nanomole range (Kd=291.4 nM). The ULK1 (Y89A) mutant protein caused a sharp decrease in binding affinity with lower response and Kd than wild-type ULK1, ULK1 (K50A) and ULK1 (L53A) mutants.	657.54	2088939-99-3	C33H45Cl4N3O2	Cl.Cl.CC(C)CN(CC(C)C)CC(=O)N1CCN(CC1)CC(OCC2=CC=C3C=CC=CC3=C2)C4=CC=C(Cl)C=C4Cl	14.6368	19.5602
WAY-346658	c-Jun N-terminal kinase	others	dual inhibitors of the c-Jun N-terminal kinase	294.757	381714-44-9	C13H11ClN2O2S	NC(=O)C1=C(NC(=O)CC2=CC=C(Cl)C=C2)SC=C1	51.4838	13.3853
GSK2334470	PDK	PI3K/Akt/mTOR	GSK2334470 is a novel PDK1 inhibitor with IC50 of ~10 nM in a cell-free assay, with no activity at other close related AGC-kinases.	462.59	1227911-45-6	C25H34N8O	CNC1=NC(=CC(=N1)N2CC(CCC2C)C(=O)NC3CCCCC3)C4=CC5=C(C=C4)C(=N[NH]5)N	40.1134	20.0028
Galangin	P450 (e.g. CYP17)	Metabolism	Galangin, a naturally occuring flavonoid found in herbs, is a well-known antioxidant and also an inhibitor of CYP1A1 activity and an agonist/antagonist of the aryl hydrocarbon receptor.	270.24	548-83-4	C15H10O5	OC1=CC2=C(C(=C1)O)C(=O)C(=C(O2)C3=CC=CC=C3)O	28.4193	9.89627
BIO	GSK-3	PI3K/Akt/mTOR	BIO is a specific inhibitor of GSK-3 with IC50 of 5 nM for GSK-3α/β in a cell-free assay, shows >16-fold selectivity over CDK5, also a pan-JAK inhibitor.	356.17	667463-62-9	C16H10BrN3O2	O\N=C/1\C(NC2=CC=CC=C12)=C3\C(=O)NC4=C3C=CC(=C4)Br	50.297	12.1248
Peficitinib (ASP015K, JNJ-54781532)	JAK	JAK/STAT	Peficitinib (ASP015K, JNJ-54781532) is an orally bioavailable JAK inhibitor. Phase 3.	326.39	944118-01-8	C18H22N4O2	NC(=O)C1=C(N[CH]2C3C[CH]4CC2C[C](O)(C4)C3)C5=C([NH]C=C5)N=C1	60.752	45.6186
OSU-03012 (AR-12)	PDK	PI3K/Akt/mTOR	OSU-03012 (AR-12) is a potent inhibitor of recombinant PDK-1(phosphoinositide-dependent kinase 1) with IC50 of 5 μM in a cell-free assay and 2-fold increase in potency over OSU-02067.	460.45	742112-33-0	C26H19F3N4O	NCC(=O)NC1=CC=C(C=C1)[N]2N=C(C=C2C3=CC4=C(C=C3)C5=C(C=CC=C5)C=C4)C(F)(F)F	24.927	0.787232
BMS-582949	p38 MAPK	MAPK	BMS-582949 is a potent and selective p38 mitogen-activated protein kinase (p38 MAPK) inhibitor with IC50 of 13nM,inhibiting both p38 kinase activity and activation of p38.	406.48	623152-17-0	C22H26N6O2	CCCNC(=O)C1=C[N]2N=CN=C(NC3=CC(=CC=C3C)C(=O)NC4CC4)C2=C1C	17.3856	2.95028
Seletalisib (UCB-5857)	PI3K	PI3K/Akt/mTOR	Seletalisib is a novel small-molecule inhibitor of <b>PI3Kδ</b> with an IC50 value of 12 nM and shows significant selectivity to PI3Kδ with respect to the other class I PI3K isoforms (between 24- and 303-fold).	482.85	1362850-20-1	C23H14ClF3N6O	[O-][N+]1=CC=CC(=C1)C2=NC3=C(Cl)C=CC=C3C=C2C(NC4=C5N=CC=CC5=NC=N4)C(F)(F)F	20.7088	10.9421
Hesperetin	TGF-beta/Smad,Histamine Receptor	TGF-beta/Smad	Hesperetin is a bioflavonoid and, to be more specific, a flavanone.	302.27	520-33-2	C16H14O6	COC1=CC=C(C=C1O)C2CC(=O)C3=C(O)C=C(O)C=C3O2	34.8145	5.26783
Pluripotin (SC1)	ERK	MAPK	Pluripotin (SC1) is a dual inhibitor of extracellular signal-regulated kinase 1 (ERK1, MAPK3) and RasGAP with Kd values of 98 nM and 212 nM respectively. It maintains embryonic stem cell (ESC) self-renewal.	550.53	839707-37-8	C27H25F3N8O2	C[N]1N=C(C)C=C1NC2=NC=C3CN(C(=O)N(C)C3=N2)C4=CC(=CC=C4C)NC(=O)C5=CC=CC(=C5)C(F)(F)F	20.7018	39.5889
PHA-680632	Aurora Kinase	Cell Cycle	PHA-680632 is potent inhibitor of Aurora A, Aurora B and Aurora C with IC50 of 27 nM, 135 nM and 120 nM, respectively. It has 10- to 200-fold higher IC50 for FGFR1, FLT3, LCK, PLK1, STLK2, and VEGFR2/3.	501.62	398493-79-3	C28H35N7O2	CCC1=CC=CC(=C1NC(=O)N2CC3=C(C2)C(=N[NH]3)NC(=O)C4=CC=C(C=C4)N5CCN(C)CC5)CC	73.2901	18.4606
TGX-221	PI3K	PI3K/Akt/mTOR	TGX-221 is a p110β-specific inhibitor with IC50 of 5 nM in a cell-free assay, 1000-fold more selective for p110β than p110α.	364.44	663619-89-4	C21H24N4O2	CC(NC1=CC=CC=C1)C2=CC(=CN3C(=O)C=C(N=C23)N4CCOCC4)C	55.4829	3.51563
AZD1480	JAK	JAK/STAT	AZD1480 is a novel ATP-competitive JAK2 inhibitor with IC50 of 0.26 nM in a cell-free assay, selectivity against JAK3 and Tyk2, and to a smaller extent against JAK1. Phase 1.	348.77	935666-88-9	C14H14ClFN8_x000D_	CC(NC1=NC=C(Cl)C(=N1)NC2=N[NH]C(=C2)C)C3=NC=C(F)C=N3	76.4847	27.1676
Wedelolactone	NF-κB	Cancer	Wedelolactone inhibits NF-κB-mediated gene transcription in cells by blocking the phosphorylation and degradation of IκBα.	314.246	524-12-9	C16H10O7	COC1=CC2=C(C(=C1)O)C3=C(C(=O)O2)C4=C(O3)C=C(O)C(=C4)O	46.0161	14.7638
MK-8745	Aurora Kinase	Cell Cycle	MK-8745 is a potent and selective Aurora A inhibitor with IC50 of 0.6 nM, more than 450-fold selectivity for Aurora A over Aurora B.	431.91	885325-71-3	C20H19ClFN5OS	FC1=C(C=CC=C1Cl)C(=O)N2CCN(CC2)CC3=CC=CC(=N3)NC4=NC=CS4	41.6652	25.9708
AZD3264	IκB/IKK	NF-κB	AZD3264 is a novel IKK2 inhibitor.	441.5	1609281-86-8	C21H23N5O4S	CC1=C(C(=NO1)C)C2=CC(=C(C=C2)C3=CC(=C(NC(N)=O)S3)C(N)=O)OC4CCNC4	25.3015	21.6211
Hydroxyfasudil (HA-1100) HCl	ROCK	Cell Cycle	Hydroxyfasudil (HA-1100), an active metabolite of fasudil hydrochloride, is a specific Rho-kinase(ROCK) inhibitor with IC50 values of 0.73 μM and 0.72 μM for ROCK1 and ROCK2, respectively.	343.83	155558-32-0 (HCl salt)	C14H18ClN3O3RS	Cl.O=C1NC=CC2=C1C=CC=C2[S](=O)(=O)N3CCCNCC3	17.84	-0.84161
WHI-P97	JAK	JAK/STAT	WHI-P97 is a potent inhibitor of <b>JAK-3</b> with an estimated Ki value of 0.09 μM in modeling studies and a measured IC50 value of 2.5 μM in EGFR kinase inhibition assays.	455.1	211555-05-4	C16H13Br2N3O3	COC1=CC2=NC=NC(=C2C=C1OC)NC3=CC(=C(O)C(=C3)Br)Br	23.5974	22.9462
AG 494	EGFR	Protein Tyrosine Kinase	AG-494, a member of the tyrphostin family of tyrosine kinase inhibitors, is a potent inhibitor of EGF receptor autophosphorylation (IC50=1.2 μM) and EGF-dependent cell growth (IC50=6 μM).	280.28	133550-35-3	C16H12N2O3_x000D_	OC1=C(O)C=C(C=C1)\C=C(C#N)\C(=O)NC2=CC=CC=C2	51.6922	17.6378
WAY-297629	VEGFR2	Protein Tyrosine Kinase ,Angiogenesis	VEGFR2 inhibitor	346.379	371213-22-8	C21H18N2O3	COC1=CC=C(C=C1OC)C2=CC(=N[NH]2)C3=CC=C4C=CC=CC4=C3O	51.078	28.352
Rapamycin (Sirolimus)	Autophagy,mTOR	PI3K/Akt/mTOR	Rapamycin (Sirolimus) is a specific mTOR inhibitor with IC50 of ~0.1 nM HEK293 cells.	914.18	53123-88-9	C51H79NO13	COC1CC(CCC1O)CC(C)C2CC(=O)C(C)\C=C(/C)C(O)C(OC)C(=O)C(C)CC(C)/C=C/C=C/C=C(C)/C(CC3CCC(C)C(O)(O3)C(=O)C(=O)N4CCCCC4C(=O)O2)OC	44.3741	25.9052
SAR-020106	Chk	Cell Cycle	SAR-020106 is an ATP-competitive, potent, and selective CHK1 inhibitor with an IC50 of 13.3 nM.	382.85	1184843-57-9	C19H19ClN6O	CC(CN(C)C)OC1=C(N=CC(=N1)NC2=NC=C3C(=CC=CC3=C2)Cl)C#N	4.22104	32.9048
NSC 42834	JAK	JAK/STAT	NSC42834 is an inhibitor of the autophosphorylation of wild type and V617F mutant forms of JAK2 with IC50 values between 10 and 30 μM.	344.45	195371-52-9	C23H24N2O_x000D_	CC(CCC1=NC=CC=C1)(CCC2=NC=CC=C2)C(=O)C3=CC=CC=C3	69.261	36.2505
GW5074	Raf	MAPK	GW5074 is a potent and selective c-Raf inhibitor with IC50 of 9 nM, no effect on the activities of JNK1/2/3, MEK1, MKK6/7, CDK1/2, c-Src, p38 MAP, VEGFR2 or c-Fms is noted.	520.94	220904-83-6	C15H8Br2INO2	OC1=C(Br)C=C(C=C1Br)C=C2C(=O)NC3=CC=C(I)C=C23	33.0838	-1.88455
Ridaforolimus (Deforolimus, MK-8669)	mTOR	PI3K/Akt/mTOR	Ridaforolimus (Deforolimus, MK-8669) is a selective mTOR inhibitor with IC50 of 0.2 nM in HT-1080 cell line while not classified as a prodrug, mTOR inhibition and FKBP12 binding is similar to rapamycin. Phase 3.	990.21	572924-54-0	C53H84NO14P	COC1CC(CCC1O[P](C)(C)=O)CC(C)C2CC(=O)C(C)\C=C(C)\C(O)C(OC)C(=O)C(C)CC(C)/C=C/C=C/C=C(C)/C(CC3CCC(C)C(O)(O3)C(=O)C(=O)N4CCCCC4C(=O)O2)OC	57.2035	25.5328
Geldanamycin	HSP (e.g. HSP90),Autophagy	Cytoskeletal Signaling	Geldanamycin is a natural existing HSP90 inhibitor with Kd of 1.2 μM, specifically disrupts glucocorticoid receptor (GR)/HSP association.	560.64	30562-34-6	C29H40N2O9	COC1CC(C)CC2=C(OC)C(=O)C=C(NC(=O)\C(=C\C=C\C(OC)C(OC(N)=O)\C(=C\C(C)C1O)C)C)C2=O	46.7404	4.18382
PF-431396	FAK	Angiogenesis	PF-431396 is a dual PYK2/FAK inhibitor with IC50 of 11 nM and 2 nM, respectively.	506.5	717906-29-1	C22H21F3N6O3S	CN(C1=CC=CC=C1CNC2=C(C=NC(=N2)NC3=CC=C4NC(=O)CC4=C3)C(F)(F)F)[S](C)(=O)=O	28.4486	41.62
WAY-118985	TAOK2	kianse	inhibit the kinase activity of TAOK2	288.391	315704-83-7	C13H12N4S2	CC1=C(SC(=N1)N)C2=CSC(=N2)NC3=CC=CC=C3	30.5099	17.3757
LY2090314	GSK-3	PI3K/Akt/mTOR	LY2090314 is a potent GSK-3 inhibitor for GSK-3α/β with IC50 of 1.5 nM/0.9 nM may improve the efficacy of platinum-based chemotherapy regimens. LY2090314 is highly selective towards GSK3 as demonstrated by its fold selectivity relative to a large panel of kinases.	512.53	603288-22-8	C28H25FN6O3	FC1=CC2=C3[N](CCN(C2)C(=O)N4CCCCC4)C=C(C3=C1)C5=C(C(=O)NC5=O)C6=CN=C7C=CC=C[N]67	23.2295	13.7722
ZT-12-037-01	Serine/threonin kina	Apoptosis	ZT-12-037-01 is a specific and ATP-competitive STK19 inhibitor with IC50s of 23.96 nM and 27.94 nM for STK19 (WT) and STK19 (D89N), respectively. It displays extremely high kinase selectivity using KINOMEscan against a panel of 468 diverse kinases using an in vitro ATP-site competition binding assay at 1 μM.	385.5	2328073-61-4	C21H31N5O2_x000D_	COC1=CC2=NC(=NC(=C2C=C1OC)NC3CCN(CC3)C(C)C)NC4CC4	49.9097	10.1574
WAY-655860	B-Raf	MAPK	inhibitors of B-Raf	241.312	63895-45-4	C13H11N3S	CC1=CC=C(NC2=NC=NC3=C2C=CS3)C=C1	34.9691	12.4628
LFM-A13	BTK	Angiogenesis	LFM-A13 is a specific Bruton's tyrosine kinase (BTK) inhibitor with IC50 of 2.5 μM, >100-fold selectivity over other protein kinases including JAK1, JAK2, HCK, EGFR,and IRK.	360	244240-24-2	C11H8Br2N2O2	C/C(O)=C(C#N)/C(=O)NC1=C(Br)C=CC(=C1)Br	22.1243	37.5769
WAY-382818	mitogen-activated protein kinase phosphatase-1	others	mitogen-activated protein kinase phosphatase-1 inhibitory activity	444.439	1022922-35-5	C24H20N4O5	CN1C(=C(C(=O)COC(=O)C2=CC(=NC3=C2C=CC=C3)C4=CC=CC=C4)C(=O)N(C)C1=O)N	29.5756	14.5873
Serabelisib (INK-1117,MLN-1117,TAK-117)	PI3K	PI3K/Akt/mTOR	Serabelisib (INK-1117,MLN-1117,TAK-117) is a potent and selective oral PI3Kα isoform inhibitor (IC50 of 21 nmol/L against PI3Kα) that has demonstrated > 100-fold selectivity relative to other class I PI3K family members (PI3Kβ/γ/δ) and mTOR, and a high degree of selectivity against many other kinase.	363.37	1268454-23-4	C19H17N5O3	NC1=NC2=C(O1)C=CC(=C2)C3=C[N]4C(=NC=C4C(=O)N5CCOCC5)C=C3	55.6014	24.494
Quercetin Dihydrate	Others	Others	Quercetin, a polyphenolic flavonoid found in a wide variety of plant-based foods, such as apples, onions, berries, and red wine, is utilized in many different cultures for their nervous system and anticancer effects.	338.27	6151-25-3	C15H14O9	O.O.OC1=CC(=C2C(=O)C(=C(OC2=C1)C3=CC=C(O)C(=C3)O)O)O	40.2292	12.9191
Deltarasin	PDE	Metabolism	Deltarasin is a small molecular inhibitor of KRAS-PDEδ interaction with Kd of 38 nM for binding to purified PDEδ.	603.75	1440898-61-2	C40H37N5O	C1CC(CCN1)C(COC2=CC=C(C=C2)C3=NC4=C(C=CC=C4)[N]3CC5=CC=CC=C5)[N]6C7=CC=CC=C7N=C6C8=CC=CC=C8	33.2917	8.58765
WAY-329356	Abl	Angiogenesis	ABL kinase inhibiting activities	437.533	943932-17-0	C28H27N3O2	C[N]1C=C(C2C(C(=O)NCC3=CC=C(C)C=C3)C4=CC=CC=C4C(=O)N2C)C5=C1C=CC=C5	-2.59865	19.4219
Bupivacaine HCl	Sodium Channel	Transmembrane Transporters	Bupivacaine HCl binds to the intracellular portion of voltage-gated sodium channels and blocks sodium influx into nerve cells, used for treating cardiac arrhythmias.	324.89	18010-40-7	C18H29ClN2O	Cl.CCCCN1CCCCC1C(=O)NC2=C(C)C=CC=C2C	12.0276	8.71944
UNC2025 HCl	TAM Receptor,FLT3	Protein Tyrosine Kinase	UNC2025 is a potent and orally bioavailable dual MER/FLT3 inhibitor with IC50 of 0.74 nM and 0.8 nM, respectively, about 20-fold selectivity over Axl and Tyro3.	513.12	1429881-91-3(free base)	C28H41ClN6O	Cl.CCCCNC1=NC=C2C(=C[N](C3CCC(O)CC3)C2=N1)C4=CC=C(CN5CCN(C)CC5)C=C4	52.3444	31.3249
10058-F4	c-Myc	Cell Cycle	10058-F4 is a c-Myc inhibitor that specificallly inhibits the c-Myc-Max interaction and prevents transactivation of c-Myc target gene expression.	249.35	403811-55-2	C12H11NOS2	CCC1=CC=C(C=C1)\C=C/2SC(=S)NC2=O	46.1076	5.93532
WAY-358981	sphingosine kinase	GPCR & G Protein	Sphingosine kinase inhibitors; Sphingosine kinase inhibitors;	252.271	307322-32-3	C14H12N4O	NNC(=O)C1=CC(=N[NH]1)C2=CC=C3C=CC=CC3=C2	31.843	9.13796
Ceritinib (LDK378)	ALK	Protein Tyrosine Kinase	Ceritinib (LDK378) is potent inhibitor against ALK with IC50 of 0.2 nM in cell-free assays, shows 40- and 35-fold selectivity against IGF-1R and InsR, respectively. Phase 3.	558.14	1032900-25-6	C28H36ClN5O3S	CC(C)OC1=C(NC2=NC(=C(Cl)C=N2)NC3=C(C=CC=C3)[S](=O)(=O)C(C)C)C=C(C)C(=C1)C4CCNCC4	44.6201	17.4414
ONO-7475	TAM Receptor	Protein Tyrosine Kinase	ONO-7475 is a potent, selective, and orally active novel inhibitor of <b>Anexelekto(Axl)/MER tyrosine kinase</b> with IC50 of 0.7 nM and 1.0 nM for AXL and MER, respectively. ONO-7475 suppresses the emergence and maintenance of tolerant cells to the initial EGFR-TKIs, osimertinib or dacomitinib, in AXL-overexpressing EGFR-mutated NSCLC cells. ONO-7475 arrests growth and kills FMS-like tyrosine ki…	562.57	1646839-59-9	C32H26N4O6_x000D_	COC1=CC2=C(C=C1OC)C(=CC=N2)OC3=CN=C(NC(=O)C4=CC5=C(CCCC5=O)N(C4=O)C6=CC=CC=C6)C=C3	23.4319	44.5263
WYE-176092	mycobacterial serine/threonine protein kinases	Microbiology	Inhibitor of mycobacterial serine/threonine protein kinases	282.382	121746-06-3	C12H14N2O2S2	OCCSC1=NC2=C(C(=O)N1)C3=C(CCCC3)S2	15.447	13.8187
Pamapimod (R-1503, Ro4402257)	p38 MAPK	MAPK	Pamapimod (R-1503, Ro4402257) is a novel, selective inhibitor of p38 mitogen-activated protein kinase. It inhibits p38α and p38β enzymatic activity with IC50 values of 0.014±0.002 and 0.48± 0.04 microM, respectively with no activity against p38delta or p38gamma isoforms.	406.38	449811-01-2	C19H20F2N4O4	CN1C(=O)C(=CC2=CN=C(NC(CCO)CCO)N=C12)OC3=C(F)C=C(F)C=C3	10.7275	30.3225
CA-4948	TLR,IL Receptor	Immunology & Inflammation	CA-4948 is a reversible kinase inhibitor that modulates IRAK4 function in both the toll-like receptor (TLR) and interleukin 1 receptor (IL-1R) signaling cascades, and demonstrates pharmacodynamic and antitumor activity in in vitro and in vivo nonclinical models.	417.42	1801343-74-7	C21H19N7O3	NC1=CC=C(C=N1)C2=CC=CC(=N2)C(=O)NC3=CC4=C(N=C3)N=C(O4)N5CCOCC5	19.6384	19.1821
WAY-613982	CK2	Metabolism & Stem Cells & Wnt	CK2 inhibitors	252.356	330449-39-3	C11H12N2OS2	CCC1=CC2=C(NC(=S)N(CC=C)C2=O)S1	26.2151	12.9679
Danusertib (PHA-739358)	Aurora Kinase,Bcr-Abl,c-RET,FGFR	Cell Cycle	Danusertib (PHA-739358) is an Aurora kinase inhibitor for Aurora A/B/C with IC50 of 13 nM/79 nM/61 nM in cell-free assays, modestly potent to Abl, TrkA, c-RET and FGFR1, and less potent to Lck, VEGFR2/3, c-Kit, CDK2, etc. Phase 2.	474.55	827318-97-8	C26H30N6O3	COC(C(=O)N1CC2=C(C1)C(=N[NH]2)NC(=O)C3=CC=C(C=C3)N4CCN(C)CC4)C5=CC=CC=C5	55.9024	15.4349
WAY-326250	shikimate kinase	Microbiology	altering the lifespan of a eukaryotic organism; Mycobacterium tuberculosis shikimate kinase inhibitor;	311.362	869872-13-9	C15H13N5OS	COC1=CC(=CC=C1)C2=CC([N]3N=NN=C3N2)C4=CC=CS4	14.1389	32.2704
Bosutinib (SKI-606)	Src	Angiogenesis	Bosutinib (SKI-606) is a novel, dual Src/Abl inhibitor with IC50 of 1.2 nM and 1 nM in cell-free assays, respectively.	530.45	380843-75-4	C26H29Cl2N5O3	COC1=C(Cl)C=C(Cl)C(=C1)NC2=C(C=NC3=CC(=C(OC)C=C23)OCCCN4CCN(C)CC4)C#N	65.7482	-8.37582
AG-1557	EGFR	Protein Tyrosine Kinase & Angiogenesis & JAK/STAT	AG-1557 is a specific and ATP competitive inhibitor of <b>epidermal growth factor receptor (EGFR)</b> tyrosine kinase.	407.21	189290-58-2	C16H14IN3O2_x000D_	COC1=C(OC)C=C2C(=NC=NC2=C1)NC3=CC(=CC=C3)I	58.0492	1.41729
TCS 359	FLT3	Angiogenesis	TCS 359 is a potent FLT3 inhibitor with IC50 of 42 nM.	360.43	301305-73-7	C18H20N2O4S	COC1=CC=C(C=C1OC)C(=O)NC2=C(C(N)=O)C3=C(CCCC3)S2	19.8472	28.013
GSK'872 (GSK2399872A)	Serine/threonin kinase	Apoptosis	GSK'872 (GSK2399872A) is a potent and selective RIP3 kinase inhibitor which binds RIP3 kinase domain with high affinity (IC50=1.8 nM) and inhibits kinase activity with IC50 of 1.3 nM. It has minimal cross-reactivity.	383.49	1346546-69-7	C19H17N3O2S2	CC(C)[S](=O)(=O)C1=CC=C2N=CC=C(NC3=CC4=C(SC=N4)C=C3)C2=C1	40.0602	19.5727
WAY-346940	Rho	Cell Cycle	Rho-kinase inhibitors	346.791	392246-66-1	C15H11ClN4O2S	ClC1=CC=CC(=C1)NC(=O)CSC2=NN=C(O2)C3=CC=NC=C3	30.9304	21.2337
SBP-7455	ULK	Autophagy	SBP-7455 is a dual-Specific ULK1/2 autophagy inhibitor with IC50s of 13 nM and 476 nM for ULK1 and ULK2 in ADP-Glo assay, respectively.	354.33	1884222-74-5	C16H17F3N4O2_x000D_	COC1=C(OC)C=C(NC2=NC=C(C(=N2)NC3CC3)C(F)(F)F)C=C1	63.2376	13.6066
MK-2206 2HCl	Akt	PI3K/Akt/mTOR	MK-2206 2HCl is a highly selective inhibitor of Akt1/2/3 with IC50 of 8 nM/12 nM/65 nM in cell-free assays, respectively no inhibitory activities against 250 other protein kinases observed. Phase 2.	480.39	1032350-13-2	C25H23Cl2N5O	Cl.Cl.NC1(CCC1)C2=CC=C(C=C2)C3=C(C=C4C(=N3)C=CN5C(=O)NN=C45)C6=CC=CC=C6	44.4481	18.6447
Milciclib (PHA-848125)	CDK	Cell Cycle	Milciclib (PHA-848125) is a potent, ATP-competitive CDK inhibitor for CDK2 with IC50 of 45 nM. It is >3-fold more selective for CDK2 than CDK1, 2, 4, 5, and 7. Phase 2.	460.57	802539-81-7	C25H32N8O	CNC(=O)C1=N[N](C)C2=C1C(C)(C)CC3=CN=C(NC4=CC=C(C=C4)N5CCN(C)CC5)N=C23	35.0149	53.8793
BIX 02189	MEK	MAPK	BIX02189 is a selective inhibitor of MEK5 with IC50 of 1.5 nM, also inhibits ERK5 catalytic activity with IC50 of 59 nM in cell-free assays, and does not inhibit closely related kinases MEK1, MEK2, ERK2, and JNK2.	440.54	1094614-85-3	C27H28N4O2	CN(C)CC1=CC=CC(=C1)N/C(C2=CC=CC=C2)=C/3C(=O)NC4=CC(=CC=C34)C(=O)N(C)C	54.2848	22.9085
Anhydroicaritin	Others	Others	Icaritin has hormone regulation activity. Icaritin has cardiovascular function improvement activity. Icaritin has anticancer activity, can induce S phase arrest and apoptosis, inhibit ENKL cell proliferation. Icaritin has anti-MM activity, mainly mediated by inhibiting IL-6/JAK2/STAT3 signaling. Icariside II inhibits pre-osteoclast RAW264.7 growth , which maybe contribute to the efficiency of Her…	368.38	118525-40-9	C21H20O6	COC1=CC=C(C=C1)C2=C(O)C(=O)C3=C(O)C=C(O)C(=C3O2)CC=C(C)C	39.7043	10.5417
ALW II-41-27	Ephrin receptor	Protein Tyrosine Kinase	ALW II-41-27 (compound 7) is a potent inhibitor of Eph receptor tyrosine kinase with Kd of 12 nM for EphA2.	607.69	1186206-79-0	C32H32F3N5O2S_x000D_	CCN1CCN(CC1)CC2=CC=C(NC(=O)C3=CC=C(C)C(=C3)NC(=O)C4=CC(=CN=C4)C5=CC=CS5)C=C2C(F)(F)F	38.0411	22.1228
Tanshinone IIA sulfonate (sodium)	CaMK	Neuronal Signaling	Sodium tanshinone IIA sulfonate (STS) is a water-soluble derivative of tanshinone IIA isolated as the main pharmacologically active natural compound from a traditional Chinese herbal medicine, the dried root of Salvia miltiorrhiza Bunge known as Danshen a potent negative allosteric modulator of the human purinergic receptor P2X7.	396.39	69659-80-9	C19H17NaO6S	[Na+].CC1=C(OC2=C1C(=O)C(=O)C3=C2C=CC4=C3CCCC4(C)C)[S]([O-])(=O)=O	36.6138	24.7591
GNE-317	PI3K	PI3K/Akt/mTOR	GNE-317 is a potent, brain-penetrant PI3K inhibitor.	414.48	1394076-92-6	C19H22N6O3S	COC1(COC1)C2=C(C)C3=C(S2)C(=NC(=N3)C4=CN=C(N)N=C4)N5CCOCC5	74.8042	61.2291
ON123300	CDK	Cell Cycle	ON123300 is a potent and multi-targeted kinase inhibitor with IC50 of 3.9 nM, 5 nM, 26 nM, 26 nM, 9.2 nM and 11nM for CDK4, Ark5, PDGFRβ, FGFR1, RET, and Fyn, respectively.	429.52	1357470-29-1	C24H27N7O	CN1CCN(CC1)C2=CC=C(NC3=NC=C4C=C(C#N)C(=O)N(C5CCCC5)C4=N3)C=C2	32.703	16.2398
Quizartinib (AC220)	FLT3	Angiogenesis	Quizartinib (AC220) is a second-generation FLT3 inhibitor for Flt3(ITD/WT) with IC50 of 1.1 nM/4.2 nM in MV4-11 and RS411 cells, respectively, 10-fold more selective for Flt3 than KIT, PDGFRα, PDGFRβ, RET, and CSF-1R. Phase 3.	560.67	950769-58-1	C29H32N6O4S	CC(C)(C)C1=CC(=NO1)NC(=O)NC2=CC=C(C=C2)C3=C[N]4C(=N3)SC5=CC(=CC=C45)OCCN6CCOCC6	32.9526	12.4235
WAY-278705	PI3K	PI3K/Akt/mTOR	phosphoinositide 3-kinase (PI3 kinase) modulators	339.251	476280-90-7	C14H15BrN2OS	BrC1=CC2=C(C=C1)N=C(NC(=O)C3CCCCC3)S2	20.117	7.12915
RA-190	Proteasome	Ubiquitin	RA190, a bis-benzylidine piperidon, is a potent, selective and oral effective inhibitor of proteasome ubiquitin receptor RPN13/ADRM1 with anticancer activity. RA190 triggers ER stress response, p53/p21 signaling axis and autophagy in multiple myeloma cells.	596.76	1617495-03-0	C28H23Cl5N2O2_x000D_	Cl.NC(CC1=CC=CC=C1)C(=O)N2CC(=C/C3=CC(=C(Cl)C=C3)Cl)/C(=O)C(/C2)=C\C4=CC(=C(Cl)C=C4)Cl	34.0699	26.2242
TAS-301	Others	Others	TAS-301 is an inhibitor of smooth muscle cell migration and proliferation and inhibits intimal thickening after balloon injury to rat carotid arteries.	357.4	193620-69-8	C23H19NO3_x000D_	COC1=CC=C(C=C1)C(C2=CC=C(OC)C=C2)=C3C(=O)NC4=C3C=CC=C4	36.5676	34.0562
WZ4002	EGFR	Protein Tyrosine Kinase	WZ4002 is a novel, mutant-selective EGFR inhibitor for EGFR(L858R)/(T790M) with IC50 of 2 nM/8 nM in BaF3 cell line does not inhibit ERBB2 phosphorylation (T798I).	494.18	1213269-23-8	C25H27ClN6O3	COC1=C(NC2=NC=C(Cl)C(=N2)OC3=CC(=CC=C3)NC(=O)C=C)C=CC(=C1)N4CCN(C)CC4	33.5412	-5.24716
(+)-Fangchinoline	Others	Others	Fangchinoline is a phytochemical that has been shown to elicit anti-cancer effects in prostate and breast cancer cell lines via inducing G1 cell cycle arrest. It has also been shown to possess neuroprotective activity.	608.72	436-77-1	C37H40N2O6	COC1=C2OC3=CC=C(CC4N(C)CCC5=C4C=C(OC6=C7C(CC(=C2)C=C1)N(C)CCC7=CC(=C6O)OC)C(=C5)OC)C=C3	19.8737	10.0937
DCPIB	Potassium Channel	Transmembrane Transporters	DCPIB is a specific and potent inhibitor of volume-regulated anion channels (VRAC). DCPIB potently inhibits several K2P channels with no voltage dependence, including TRESK, TASK1, and TASK3. DCPIB displayed superior selectivity toward TRESK with an IC50 of 0.14 μM, demonstrating at least 100-fold higher affinity over TREK1/TRAAK channels. DCPIB is also a novel selective blocker of I(Cl,swell), w…	427.36	82749-70-0	C22H28Cl2O4_x000D_	CCCCC1(CC2=CC(=C(Cl)C(=C2C1=O)Cl)OCCCC(O)=O)C3CCCC3	48.5195	-3.3854
Dovitinib (TKI258) Lactate	FLT3,c-Kit,FGFR,PDGFR,VEGFR	Angiogenesis	Dovitinib (TKI258, CHIR258) Lactate is the Lactate of Dovitinib, which is a multitargeted RTK inhibitor, mostly for class III (<b>FLT3/c-Kit</b>) with <b>IC50</b> of 1 nM/2 nM, also potent to class IV (<b>FGFR1/3</b>) and class V (<b>VEGFR1-4</b>) RTKs with <b>IC50</b> of 8-13 nM, less potent to InsR, EGFR, c-Met, EphA2, Tie2, IGFR1 and HER2. Phase 4._x000D_	500.52	915769-50-5 (monohydrate)	C24H27FN6O4	CC(O)C(O)=O.CN1CCN(CC1)C2=CC3=C(C=C2)N=C([NH]3)C4=C(N)C5=C(NC4=O)C=CC=C5F	25.8239	28.9761
Ribociclib (LEE011)	CDK	Cell Cycle	Ribociclib (LEE011) is an orally available, and highly specific CDK4/6 inhibitor. Phase 3.	434.54	1211441-98-3	C23H30N8O	CN(C)C(=O)C1=CC2=CN=C(NC3=NC=C(C=C3)N4CCNCC4)N=C2[N]1C5CCCC5	26.8838	23.7168
P276-00	CDK	Cell Cycle	P276-00 is a novel CDK1, CDK4 and CDK9 inhibitor with IC50 of 79 nM, 63 nM and 20 nM, respectively. Phase 2/3.	438.3	920113-03-7	C21H21Cl2NO5	Cl.CN1CCC(C1CO)C2=C(O)C=C(O)C3=C2OC(=CC3=O)C4=C(Cl)C=CC=C4	73.3957	48.2982
PF-06651600	JAK	JAK/STAT	PF-06651600 is a potent and irreversible JAK3-selective inhibitor with an IC50 of 33.1 nM but without activity (IC50 > 10 000 nM) against JAK1, JAK2, and TYK2.	285.34	1792180-81-4	C15H19N5O	CC1CCC(CN1C(=O)C=C)NC2=C3C=C[NH]C3=NC=N2	12.9015	-5.23595
Chloropyramine hydrochloride	Histamine Receptor	Neuronal Signaling	Chloropyramine hydrochloride is a <b>histamine receptor H1</b> antagonist and has anti-cholinergic, antispasmodic, and antiallergic effects.	326.26	6170-42-9	C16H21Cl2N3	Cl.CN(C)CCN(CC1=CC=C(Cl)C=C1)C2=CC=CC=N2	30.1223	9.48199
MPI-0479605	Kinesin	Cytoskeletal Signaling	MPI-0479605 is an ATP competitive and selective inhibitor of mitotic kinase Mps1 with IC50 of 1.8 nM, >40-fold selectivity over other kinases.	407.51	1246529-32-7	C22H29N7O	CC1=CC(=CC=C1NC2=NC3=C(N=C[NH]3)C(=N2)NC4CCCCC4)N5CCOCC5	47.7558	17.9524
Alpelisib (BYL719)	PI3K	PI3K/Akt/mTOR	Alpelisib (BYL719) is a potent and selective PI3Kα inhibitor with IC50 of 5 nM in a cell-free assay, and minimal effect on PI3Kβ/γ/δ. Phase 2.	441.47	1217486-61-7	C19H22F3N5O2S	CC1=C(SC(=N1)NC(=O)N2CCCC2C(N)=O)C3=CC(=NC=C3)C(C)(C)C(F)(F)F	19.207	8.48935
LDC1267	TAM Receptor	Protein Tyrosine Kinase	LDC1267 is a highly selective TAM kinase inhibitor with IC50 of <5 nM, 8 nM, and 29 nM for Mer, Tyro3, and Axl, respectively. Displays lower activity against Met, Aurora B, Lck, Src, and CDK8.	560.55	1361030-48-9	C30H26F2N4O5	CCOC1=C[N](N=C1C(=O)NC2=CC=C(OC3=CC=NC4=CC(=C(OC)C=C34)OC)C(=C2)F)C5=CC=C(F)C=C5C	6.91742	28.8406
Bozitinib (PLB-1001)	c-Met	Protein Tyrosine Kinase	Bozitinib (PLB-1001) is a highly selective ATP-competitive c-Met inhibitor with blood-brain barrier permeability. Bozitinib (PLB-1001) selectively inhibits MET-altered tumor cells in preclinical models.	424.38	1440964-89-5	C20H15F3N8_x000D_ _x000D_	C[N]1C=C2C=C(C(=CC2=N1)F)C(F)(F)C3=NN=C4C=CC(=N[N]34)C5=C[N](N=C5)C6CC6	57.5227	-6.57516
Decernotinib (VX-509)	JAK	JAK/STAT	Decernotinib (VX-509) is a potent and selective JAK3 inhibitor with Ki of 2.5 nM, >4-fold selectivity over JAK1, JAK2, and TYK2, respectively. Phase 2/3.	392.38	944842-54-0	C18H19F3N6O	CCC(C)(NC1=NC(=NC=C1)C2=C[NH]C3=NC=CC=C23)C(=O)NCC(F)(F)F	47.6656	33.7223
GDC046	JAK	JAK/STAT	GDC046 (Compound 3) is a potent, selective, and orally bioavailable inhibitor of <b>TYK2</b> with Ki of 4.8 nM, 83.8 nM, 27.6 nM and 253 nM for TYK2, JAK1, JAK2, and JAK3, respectively.	350.2	1258292-64-6	C16H13Cl2N3O2_x000D_	ClC1=C(C(=O)NC2=CC(=NC=C2)NC(=O)C3CC3)C(=CC=C1)Cl	47.9471	8.4422
TAE226 (NVP-TAE226)	FAK	Angiogenesis	TAE226 (NVP-TAE226) is a potent FAK inhibitor with IC50 of 5.5 nM and modestly potent to Pyk2, ~10- to 100-fold less potent against InsR, IGF-1R, ALK, and c-Met.	468.94	761437-28-9	C23H25ClN6O3	CNC(=O)C1=C(NC2=C(Cl)C=NC(=N2)NC3=C(OC)C=C(C=C3)N4CCOCC4)C=CC=C1	23.6487	28.1738
PF-562271	FAK	Angiogenesis	PF-562271 is a potent, ATP-competitive, reversible inhibitor of FAK with IC50 of 1.5 nM in cell-free assays, ~10-fold less potent for Pyk2 than FAK and >100-fold selectivity against other protein kinases, except for some CDKs.	507.49	717907-75-0	C21H20F3N7O3S	CN(C1=C(CNC2=C(C=NC(=N2)NC3=CC=C4NC(=O)CC4=C3)C(F)(F)F)C=CC=N1)[S](C)(=O)=O	15.0391	23.1215
BI-4464	FAK	Angiogenesis	BI-4464 is a highly selective ATP competitive inhibitor of PTK2/FAK , with an IC50 of 17 nM.	555.55	1227948-02-8	C28H28F3N5O4_x000D_	COC1=CC(=CC=C1NC2=NC(=C(C=N2)C(F)(F)F)OC3=CC=CC4=C3C(=O)CC4)C(=O)NC5CCN(C)CC5	37.1801	22.6026
Pilaralisib (XL147)	PI3K	PI3K/Akt/mTOR	Pilaralisib (XL147) is a selective and reversible class I PI3K inhibitor for PI3Kα/δ/γ with IC50 of 39 nM/36 nM/23 nM in cell-free assays, less potent to PI3Kβ. Phase 1/2.	541.02	934526-89-3	C25H25ClN6O4S	COC1=CC(=C(Cl)C=C1)NC2=NC3=CC=CC=C3N=C2N[S](=O)(=O)C4=CC=CC(=C4)NC(=O)C(C)(C)N	-2.17223	27.2013
Dacomitinib (PF299804, PF299)	EGFR	Protein Tyrosine Kinase	Dacomitinib (PF299804, PF299) is a potent, irreversible pan-ErbB inhibitor, mostly to EGFR with IC50 of 6 nM in a cell-free assay, effective against NSCLCs with EGFR or ERBB2 mutations (resistant to gefitinib) as well as those harboring the EGFR T790M mutation. Phase 2.	469.94	1110813-31-4	C24H25ClFN5O2	COC1=C(NC(=O)/C=C/CN2CCCCC2)C=C3C(=NC=NC3=C1)NC4=CC(=C(F)C=C4)Cl	31.1292	2.08778
CCG-222740	Rho	Cell Cycle	CCG-222740 is a <b>Rho/MRTF pathway</b> inhibitor. CCG-222740 decreases the activation of stellate cells in vitro and in vivo, by reducing the levels of <b>alpha smooth muscle actin(α-SMA)</b> expression.	444.86	1922098-69-8	C23H19ClF2N2O3_x000D_	FC1(F)CC(CN(C1)C(=O)C2=CC(=CC=C2)C3=CC=CO3)C(=O)NC4=CC=C(Cl)C=C4	90.7329	16.2983
GSK690693	Akt	PI3K/Akt/mTOR	GSK690693 is a pan-Akt inhibitor targeting Akt1/2/3 with IC50 of 2 nM/13 nM/9 nM in cell-free assays, also sensitive to the AGC kinase family: PKA, PrkX and PKC isozymes. Phase 1.	425.48	937174-76-0	C21H27N7O3	CC[N]1C(=NC2=C1C(=CN=C2C#CC(C)(C)O)OCC3CCCNC3)C4=NON=C4N	62.3407	19.696
Lidocaine hydrochloride	EGFR	Angiogenesis	Lidocaine hydrochloride is a local anesthetic and cardiac depressant used as an antiarrhythmia agent.	270.8	73-78-9	C14H23ClN2O	Cl.CCN(CC)CC(=O)NC1=C(C)C=CC=C1C	16.7138	16.832
B-Raf IN 1	Raf	MAPK	B-Raf IN 1 is an inhibitor of Raf wih IC50 values of 24 nM and 25 nM for B-Raf and C-Raf respectively. It is selective over 13 other kinases, including PKCα, IKKβ, and PI3Kα.	515.53	950736-05-7	C29H24F3N5O_x000D_	CN(C)CC1=CC=C(C=C1)C2=C3N=CC=C([N]3N=C2)C4=CC(=CC=C4)NC(=O)C5=CC=CC(=C5)C(F)(F)F	50.2422	27.2237
MK-3903	AMPK	PI3K/Akt/mTOR	MK-3903 is a potent and selective <b>AMPK</b> activator with an EC50 of 8 nM for α1 β1 γ1 subunit. It activates 10 of the 12 pAMPK complexes with EC50 values in the range of 8-40 nM and maximal activation >50%.	454.9	1219737-12-8	C27H19ClN2O3	CC1=CC=C(OC2=NC3=CC(=C(C=C3[NH]2)C4=CC=C(C=C4)C5=CC=CC=C5)Cl)C=C1C(O)=O	51.8638	10.7812
BAY1125976	Akt	PI3K/Akt/mTOR	BAY 1125976 is a selective allosteric <b>AKT1/2</b> inhibitor,exhibits high efficacy on AKT signaling-dependent tumor growth in mouse models. BAY1125976 inhibits the activity of <b>AKT1</b> (IC50 = 5.2 nM at 10 µM ATP and 44 nM at 2 mM ATP) and <b>AKT2</b> (IC50 = 18 nM at 10 µM ATP and 36 nM at 2 mM ATP) very potently.Whereas BAY1125976 is almost inactive on <b>AKT3</b> (IC50 = 427 nM at 10 µM A…	383.45	1402608-02-9	C23H21N5O_x000D_ _x000D_	NC(=O)C1=N[N]2C(=NC(=C2C3=CC=CC=C3)C4=CC=C(C=C4)C5(N)CCC5)C=C1	42.2006	20.4709
FIIN-2	FGFR	Protein Tyrosine Kinase	FIIN-2 is an irreversible, pan-FGFR inhibitor with IC50 of 3.09 nM, 4.3 nM, 27 nM and 45.3 nM for FGFR1/2/3/4, respectively.	634.73	1633044-56-0	C35H38N8O4	COC1=CC(=CC(=C1)OC)N2CC3=CN=C(NC4=CC=C(C=C4)N5CCN(C)CC5)N=C3N(CC6=CC=C(NC(=O)C=C)C=C6)C2=O	-2.90736	9.54645
Nemiralisib (GSK2269557)	PI3K	PI3K/Akt/mTOR	Nemiralisib, also known as GSK-2269557, is a potent and selective PI3Kδ inhibitor(pKi = 9.9).	440.54	1254036-71-9	C26H28N6O	CC(C)N1CCN(CC1)CC2=CN=C(O2)C3=CC(=CC4=C3C=N[NH]4)C5=CC=CC6=C5C=C[NH]6	4.15035	18.1364
Kobe0065	Rho	Cell Cycle	Kobe0065 is H-Ras-cRaf1 interaction inhibitor, exhibiting potent activity to competitively inhibit the binding of H-Ras·GTP to c-Raf-1 RBD with a Ki value of 46 ± 13 μM.	449.79	436133-68-5	C15H11ClF3N5O4S	CC1=C(Cl)C=C(NC(=S)NNC2=C(C=C(C=C2[N+]([O-])=O)C(F)(F)F)[N+]([O-])=O)C=C1	81.9828	11.1865
BI-D1870	S6 Kinase	PI3K/Akt/mTOR	BI-D1870 is an ATP-competitive inhibitor of S6 ribosome for RSK1/2/3/4 with IC50 of 31 nM/24 nM/18 nM/15 nM in cell-free assays, respectively 10- to 100-fold selectivity for RSK than MST2, GSK-3β, MARK3, CK1 and Aurora B.	391.42	501437-28-1	C19H23F2N5O2	CC(C)CCN1C(C)C(=O)N(C)C2=C1N=C(NC3=CC(=C(O)C(=C3)F)F)N=C2	14.8851	3.9168
WAY-651445	LIMK1，IkB	NF-κB	LIMK1 inhibitor; IkB kinase inhibitor;	335.38	848289-47-4	C18H13N3O2S	NC(=O)C1=C(N)C2=C(S1)N=C(C=C2C3=CC=CO3)C4=CC=CC=C4	17.2511	30.7685
Flufenamic acid	Immunology & Inflammation related	Immunology & Inflammation	Flufenamic Acid is an anti-inflammatory agent, and also acts as an ion channel modulator.	281.23	530-78-9	C14H10F3NO2	OC(=O)C1=CC=CC=C1NC2=CC=CC(=C2)C(F)(F)F	34.3944	25.5774
AZD6482	PI3K	PI3K/Akt/mTOR	AZD6482 is a PI3Kβ inhibitor with IC50 of 10 nM, 8-, 87- and 109-fold more selective to PI3Kβ than PI3Kδ, PI3Kα and PI3Kγ in cell-free assays. Phase 1.	408.45	1173900-33-8	C22H24N4O4	CC(NC1=CC=CC=C1C(O)=O)C2=CC(=CN3C(=O)C=C(N=C23)N4CCOCC4)C	50.8739	9.26845
AS-604850	PI3K	PI3K/Akt/mTOR	AS-604850 is a selective, ATP-competitive PI3Kγ inhibitor with IC50 of 250 nM, over 80-fold selectivity for PI3Kγ than PI3Kδ/β, and 18-fold more selective for PI3Kγ than PI3Kα.	285.22	648449-76-7	C11H5F2NO4S	FC1(F)OC2=C(O1)C=C(C=C2)\C=C3/SC(=O)NC3=O	42.4071	4.79018
ANA-12	Trk receptor	Protein Tyrosine Kinase	ANA-12 is a selective TrkB antagonist with Kd of 10 nM and 12 μM for the high and low affinity sites, respectively.	407.49	219766-25-3	C22H21N3O3S	O=C1NCCCCC1NC(=O)C2=CC=CC=C2NC(=O)C3=CC4=C(S3)C=CC=C4	9.26878	5.50125
BQR695	PI4K	PI3K/Akt/mTOR	BQR695 is a quinoxaline that displays sub-micromolar potency against human PI4KIIIβ (IC50~90 nM).	352.39	1513879-21-4	C19H20N4O3_x000D_	CNC(=O)CNC1=CN=C2C=CC(=CC2=N1)C3=CC=C(OC)C(=C3)OC	36.4932	9.64199
Epiberberine	GMNN - geminin, DNA replication inhibitor (human)	Others	A quantitative high throughput screen for small molecules that induce DNA re-replication in MCF 10a normal breast cells.	336.361	6873-09-2	C20H18NO4+	COC1=C(OC)C=C2C(=C1)CC[N+]3=C2C=C4C=CC5=C(OCO5)C4=C3	28.8974	15.9278
SB 4 (Eticovo)	TGF-beta/Smad	TGF-beta/Smad	SB 4 (Eticovo) is a potent and selective agonist of <b>bone morphogenetic protein 4 (BMP4) signaling</b> with EC50 of 74 nM. SB 4 (Eticovo) enhances canonical BMP signaling and activates <b>SMAD-1/5/9</b> phosphorylation.	320.2	100874-08-6	C14H10BrNOS_x000D_	BrC1=CC=C(CSC2=NC3=CC=CC=C3O2)C=C1	19.0632	21.8176
SGI-1776 free base	Pim	JAK/STAT	SGI-1776 free base is a novel ATP competitive inhibitor of Pim1 with IC50 of 7 nM in a cell-free assay, 50- and 10-fold selective versus Pim2 and Pim3, also potent to Flt3 and haspin. Phase 1.	405.42	1025065-69-3	C20H22F3N5O	CN1CCC(CC1)CNC2=N[N]3C(=NC=C3C4=CC=CC(=C4)OC(F)(F)F)C=C2	24.0097	31.1688
Afatinib (BIBW2992) Dimaleate	EGFR,HER2	Protein Tyrosine Kinase	Afatinib (BIBW2992) Dimaleate irreversibly inhibits EGFR/HER2 including EGFR(wt), EGFR(L858R), EGFR(L858R/T790M) and HER2 with IC50 of 0.5 nM, 0.4 nM, 10 nM and 14 nM, respectively 100-fold more active against Gefitinib-resistant L858R-T790M EGFR mutant.	717.18	850140-73-7	C32H33ClFN5O11	CN(C)C/C=C/C(=O)NC1=C(OC2CCOC2)C=C3N=CN=C(NC4=CC=C(F)C(=C4)Cl)C3=C1.OC(=O)\C=C/C(O)=O.OC(=O)\C=C/C(O)=O	51.3377	-7.71195
GSK481	TNF-alpha	Apoptosis	GSK481 is a RIP1(Receptor Interacting Protein Kinase1) inhibitor. Inhibition of RIP1 has been shown to hinder cell necrotic death.	377.39	1622849-58-4	C21H19N3O4	CN1C(=O)C(COC2=CC=CC=C12)NC(=O)C3=NOC(=C3)CC4=CC=CC=C4	16.0438	0.452253
Rociletinib (CO-1686, AVL-301)	EGFR	Protein Tyrosine Kinase	Rociletinib (CO-1686, AVL-301) is an irreversible, mutant-selective EGFR inhibitor with Ki of 21.5 nM and 303.3 nM for EGFRL858R/T790M and EGFRWT in cell-free assays, respectively. Phase 2.	555.55	1374640-70-6	C27H28F3N7O3	COC1=C(NC2=NC=C(C(=N2)NC3=CC=CC(=C3)NC(=O)C=C)C(F)(F)F)C=CC(=C1)N4CCN(CC4)C(C)=O	35.7058	8.65741
FRAX597	PAK	Cytoskeletal Signaling	FRAX597 is a potent, ATP-competitive inhibitor of group I PAKs with IC50 of 8 nM, 13 nM, and 19 nM for PAK1, PAK2, and PAK3, respectively.	558.1	1286739-19-2	C29H28ClN7OS	CCN1C(=O)C(=CC2=CN=C(NC3=CC=C(C=C3)N4CCN(C)CC4)N=C12)C5=CC=C(C=C5Cl)C6=CN=CS6	58.4447	16.5769
PF-477736	Chk	Cell Cycle	PF-477736 is a selective, potent and ATP-competitive Chk1 inhibitor with Ki of 0.49 nM in a cell-free assay and also inhibits VEGFR2, Aurora-A, FGFR3, Flt3, Fms (CSF1R), Ret and Yes. It shows ~100-fold selectivity for Chk1 than Chk2. Phase 1.	419.48	952021-60-2	C22H25N7O2	C[N]1C=C(C=N1)C2=C3C=NNC(=O)C4=C3C(=CC(=C4)NC(=O)C(N)C5CCCCC5)[NH]2	43.8427	0.509243
Euphorbiasteroid	Others	Others	Euphorbiasteroid, a component of Euphorbia lathyris L., inhibits adipogenesis of 3T3-L1 cells through activation of the AMPK pathway and induces HL-60 cells to apoptosis via promoting Bcl-2/Bax apoptotic signaling pathway in a dose-dependent manner.	552.66	28649-59-4	C32H40O8	CC1CC2(OC(C)=O)C(C1OC(=O)CC3=CC=CC=C3)C(OC(C)=O)C4(CCC5C(\C=C(C)\C2=O)C5(C)C)CO4	53.1837	13.4048
DS-6051b	ROS	Immunology & Inflammation	DS-6051b is a new-generation selective <b>ROS1/NTRK</b> inhibitor with ic50 of 0.207 nM,0.622 nM,2.28 nM and 0.980 nM for ROS1,NTRK1,NTRK2 and NTRK3,respectively.	551.61	1505515-69-4	C29H34FN5O5_x000D_	CC(N)COC1=CC=C(C=C1)C2=CN=C3C=CC(=N[N]23)NC(C)C4=CC(=CC=C4)F.OC(=O)CCCCC(O)=O	9.14994	19.4648
kb-NB77-78	Others	Others	kb-NB77-78 is an analog of CID797718. However, it shows no inhibitory activty towards PKD1.	331.48	1350622-33-1	C18H25NO3Si_x000D_	CC(C)(C)[Si](C)(C)OC1=CC2=C(OC(=O)C3=C2CCCN3)C=C1	8.7557	14.2529
WAY-323879	CDK	Cell Cycle	CDKI pathway inhibitor; CDKI pathway inhibitor;	238.284	685097-43-2	C15H14N2O	CC[N]1C(=NC2=CC=CC=C12)/C=C/C3=CC=CO3	45.9465	19.3858
Rubimaillin	Others	Others	Inhibition of thrombin-induced platelet aggregation in rabbit platelet assessed as aggregation at 300 uM treated 3 mins before thrombin challenge by turbidimetric method	284.307	55481-88-4	C17H16O4	COC(=O)C1=C(O)C2=C(C=CC=C2)C3=C1C=CC(C)(C)O3	26.269	4.9092
WAY-660667	ROS	Protein Tyrosine Kinase	inhibition of ROS kinase	339.349	871218-26-7	C17H17N5O3	CN1C(=O)N(C)C2=C([N]3C=C([N](CCO)C3=N2)C4=CC=CC=C4)C1=O	21.9465	30.9156
Ruxolitinib (INCB018424)	JAK	JAK/STAT	Ruxolitinib (INCB018424) is the first potent, selective, JAK1/2 inhibitor to enter the clinic with IC50 of 3.3 nM/2.8 nM in cell-free assays, >130-fold selectivity for JAK1/2 versus JAK3.	306.37	941678-49-5	C17H18N6	N#CCC(C1CCCC1)[N]2C=C(C=N2)C3=NC=NC4=C3C=C[NH]4	77.4037	52.4668
HMN-176	Others	Others	HMN-176 is an active metabolite of HMN-214, which has a potent antitumor activity in mouse xenograft models.	382.43	173529-10-7	C20H18N2O4S	COC1=CC=C(C=C1)[S](=O)(=O)NC2=C(C=CC=C2)\C=C\C3=CC=[N+]([O-])C=C3	52.3308	39.0972
ZM 306416	VEGFR	Protein Tyrosine Kinase	ZM 306416 is a VEGFR (Flt and KDR) inhibitor for VEGFR1 with IC50 of 0.33 μM, but also found to inhibit EGFR with IC50 of <10 nM.	333.74	690206-97-4	C16H13ClFN3O2	COC1=CC2=NC=NC(=C2C=C1OC)NC3=C(F)C=C(Cl)C=C3	33.4837	7.74498
WAY-349807	Pim-1	JAK/STAT,Epigenetics	PIM-1 kinase inhibitors	487.977	544662-95-5	C28H26ClN3O3	COC1=C(OC)C=C(C=C1)C2=CC(=C3C=CC=CC3=N2)C(=O)N4CCN(CC4)C5=CC(=CC=C5)Cl	64.2525	15.1824
Temsirolimus (CCI-779, NSC 683864)	mTOR	PI3K/Akt/mTOR	Temsirolimus (CCI-779, NSC 683864) is a specific mTOR inhibitor with IC50 of 1.76 μM in a cell-free assay.	1030.29	162635-04-3	C56H87NO16	COC1CC(CCC1OC(=O)C(C)(CO)CO)CC(C)C2CC(=O)C(C)\C=C(C)\C(O)C(OC)C(=O)C(C)CC(C)/C=C/C=C/C=C(C)/C(CC3CCC(C)C(O)(O3)C(=O)C(=O)N4CCCCC4C(=O)O2)OC	27.933	1.8867
XL228	Bcr-Abl. Aurora Kinase. IGF-1R. Src.	Angiogenesis & Cytoskeletal Signaling & TGF-beta/Smad	XL228 is a <b>protein kinase</b> inhibitor with IC50 of 5 nM, 1.4 nM, 3.1 nM, 1.6 nM, 6.1 nM and 2 nM for wild-type <b>ABL kinase</b>, <b>ABL T315I</b>, <b>Aurora A</b>, <b>IGF-1R</b>, <b>SRC</b> and <b>LYN</b>, respectively.	437.54	898280-07-4	C22H31N9O_x000D_	CC(C)C1=NOC(=C1)CNC2=NC(=CC(=N2)N3CCN(C)CC3)NC4=N[NH]C(=C4)C5CC5	34.236	46.5603
Stattic	STAT	JAK/STAT	Stattic, the first nonpeptidic small molecule, potently inhibits STAT3 activation and nuclear translocation with IC50 of 5.1 μM in cell-free assays, highly selectivity over STAT1.	211.19	19983-44-9	C8H5NO4S	[O-][N+](=O)C1=CC=C2C=C[S](=O)(=O)C2=C1	23.7805	30.7876
MK-8353 (SCH900353)	ERK	MAPK	MK-8353 (SCH900353) is an orally bioavailable, selective, and potent <b>ERK</b> inhibitor that inhibits activated ERK1 and ERK2 in vitro, with IC50 values of 23.0 nM and 8.8 nM, respectively (IMAP kinase assay), and nonactivated ERK2, with an IC50 of 0.5 nM (MEK1-ERK2-coupled assay).	691.84	1184173-73-6	C37H41N9O3S_x000D_	CSC1(CCN(CC(=O)N2CCC(=CC2)C3=CC=C(C=C3)C4=N[N](C)C=N4)C1)C(=O)NC5=CC=C6[NH]N=C(C7=CC=C(OC(C)C)N=C7)C6=C5	22.0404	6.04835
SC66	Akt	PI3K/Akt/mTOR	SC66 is an allosteric inhibitor which displays a dual-inhibitory function toward AKT activity with IC50 values of 0.77, 2.85 and 0.47 μg/ml in HepG2, Huh7 and Hep3B cells after 72 h treatment, respectively.	276.33	871361-88-5	C18H16N2O	O=C1C(/CCC\C1=C/C2=CC=NC=C2)=C/C3=CC=NC=C3	57.9259	4.08323
SL-327	MEK	MAPK	SL327 is a selective inhibitor for MEK1/2 with IC50 of 0.18 μM/ 0.22 μM, no activity towards Erk1, MKK3, MKK4, c-JUN, PKC, PKA, or CamKIIcapable of transport through the blood-brain barrier.	335.35	305350-87-2	C16H12F3N3S	NC(\SC1=CC=C(N)C=C1)=C(C#N)/C2=C(C=CC=C2)C(F)(F)F	47.425	-12.4241
TPCA-1	IκB/IKK	NF-κB	TPCA-1 is an inhibitor of IKK-2 with IC50 of 17.9 nM in a cell-free assay, inhibits NF-κB pathway, exhibits 22-fold selectivity over IKK-1.	279.29	507475-17-4	C12H10FN3O2S	NC(=O)NC1=C(C=C(S1)C2=CC=C(F)C=C2)C(N)=O	26.3539	-1.70023
C188-9	STAT	JAK/STAT	C188-9 is a potent inhibitor of STAT3 that binds to STAT3 with high affinity (KD=4.7±0.4 nM). C188-9 is well tolerated in mice, shows good oral bioavailability, and is concentrated in tumors.	471.52	432001-19-9	C27H21NO5S	COC1=CC=C(C=C1)[S](=O)(=O)NC2=CC(=C(O)C3=CC=CC=C23)C4=C(O)C=CC5=C4C=CC=C5	57.6585	11.1179
WAY-325490	mitogen activated protein kinase-activated protein kinase-2	Others	mitogen activated protein kinase-activated protein kinase-2 inhibitor; antimicrobial activity;	295.723	77607-70-6	C16H10ClN3O	NC1=C(C#N)C(=CC(=N1)C2=CC=C(Cl)C=C2)C3=CC=CO3	23.5828	17.9759
WAY-643895	Casein kinase 1δ	Metabolism	Casein kinase 1δ inhibitors; altering the lifespan of a eukaryotic organism;	229.258	851871-94-8	C11H7N3OS	O=C(NC1=C(C=CS1)C#N)C2=NC=CC=C2	-5.58585	6.33317
Compound 401	DNA-PK	DNA Damage	Compound 401 is a synthetic inhibitor of DNA-PK and mTOR (IC50=5.3 μM). It has no inhibition on p110α/p85α PI3K (>100 μM) and blocks the phosphorylation of S6 kinase 1 Thr389 and Akt Ser473 in COS7 cells.	281.31	168425-64-7	C16H15N3O2_x000D_	O=C1C=C(N=C2N1C=CC3=C2C=CC=C3)N4CCOCC4	20.6054	26.197
1-Deoxynojirimycin	Others	Others	1-Deoxynojirimycin is a potent α-glucosidase inhibitor and most commonly found in mulberry leaves. It has therapeutic potency against diabetes mellitus.	163.17	19130-96-2	C6H13NO4	OCC1NCC(O)C(O)C1O	11.2085	15.2519
PD153035	EGFR	Protein Tyrosine Kinase	PD153035 is a specific and potent inhibitor of the <b>epidermal growth factor (EGF) receptor tyrosine kinase</b> (Ki = 5.2 pM).	360.21	153436-54-5	C16H14BrN3O2_x000D_	COC1=CC2=C(C=C1OC)C(=NC=N2)NC3=CC(=CC=C3)Br	28.4802	-4.01878
GSK2606414	PERK	Apoptosis	GSK2606414 is an orally available, potent, and selective PERK inhibitor with IC50 of 0.4 nM, displaying at least 100-fold selectivity over the other EIF2AKs assayed.	451.44	1337531-36-8	C24H20F3N5O	C[N]1C=C(C2=CC=C3N(CCC3=C2)C(=O)CC4=CC=CC(=C4)C(F)(F)F)C5=C1N=CN=C5N	30.5766	-0.334763
VX-11e	ERK	MAPK	VX-11e is a potent, selective, and orally bioavailable ERK2 inhibitor with Ki of <2 nM, over 200-fold selective over other kinases tested.	500.35	896720-20-0	C24H20Cl2FN5O2	CC1=CN=C(NC2=C(Cl)C=C(F)C=C2)N=C1C3=C[NH]C(=C3)C(=O)NC(CO)C4=CC=CC(=C4)Cl	16.9784	19.382
AZD7648	DNA-PK	DNA Damage	AZD7648 is a potent inhibitor of <b>DNA-PK</b> with an IC50 of 0.6 nM in biochemical assay and more than 100-fold selective against 396 other kinases.	380.4	2230820-11-6	C18H20N8O2_x000D_	CN1C(=O)N(C2CCOCC2)C3=NC(=NC=C13)NC4=C[N]5N=CN=C5C=C4C	34.0297	22.1987
AZD6738	ATM/ATR	PI3K/Akt/mTOR	AZD6738 is an orally active, and selective ATR kinase inhibitor with IC50 of 1 nM. Phase 1/2.	412.51	1352226-88-0	C20H24N6O2S	CC1COCCN1C2=NC(=NC(=C2)C3(CC3)[S](C)(=N)=O)C4=C5C=C[NH]C5=NC=C4	-3.24175	21.2669
CNX-2006	EGFR	Protein Tyrosine Kinase	CNX-2006 is a novel irreversible mutant-selective EGFR inhibitor with IC50 of < 20 nM, with very weak inhibition at wild-type EGFR.	545.53	1375465-09-0	C26H27F4N7O2	COC1=C(NC2=NC=C(C(=N2)NC3=CC=CC(=C3)NC(=O)C=C)C(F)(F)F)C=CC(=C1)NC4CN(CCF)C4	8.1396	2.41909
KDU691	PI4K	PI3K/Akt/mTOR	KDU691 is a <i>Plasmodium</i> PI4K -specific inhibitor with IC50 values of 0.18 μM and 0.061 μM against hypnozoite forms and liver schizontsm, respectively.	419.86	1513879-19-0	C22H18ClN5O2_x000D_	CNC(=O)C1=CC=C(C=C1)C2=CN=C3C=NC(=C[N]23)C(=O)N(C)C4=CC=C(Cl)C=C4	34.3622	15.896
WYE-175837	BTK,VEGFR-2,Protein Arginine Deiminase	Angiogenesis & Protein Tyrosine Kinase,Angiogenesis	BTK inhibitor; VEGFR-2 inhibitor; Protein Arginine Deiminase inhibitor;	242.273	891-35-0	C14H14N2O2	COC1=CC=C(NC(=O)C2=CC=C(N)C=C2)C=C1	19.8389	8.43933
SD-208	TGF-beta/Smad	TGF-beta/Smad	SD-208 is a selective TGF-βRI (ALK5) inhibitor with IC50 of 48 nM, >100-fold selectivity over TGF-βRII.	352.75	627536-09-8	C17H10ClFN6	FC1=CC=C(Cl)C=C1C2=NC3=NC=CN=C3C(=N2)NC4=CC=NC=C4	-9.78099	40.7178
WAY-332656	Protein kinase C epsilon signaling	others	inhibitors of Protein kinase C epsilon signaling	352.774	904458-98-6	C18H13ClN4O2	COC1=CC2=NC3=C(C=C2C=C1)C(=N[N]3C(=O)C4=CC=CC(=C4)Cl)N	26.035	0.784597
Clemastine Fumarate	Histamine Receptor	Neuronal Signaling	Clemastine Fumarate (Clemastine) is a selective histamine H1 receptor antagonist with IC50 of 3 nM.	459.96	14976-57-9	C25H30ClNO5	CN1CCCC1CCOC(C)(C2=CC=CC=C2)C3=CC=C(Cl)C=C3.OC(=O)\C=C\C(O)=O	15.7237	0.310132
AZ304	Raf	MAPK	AZ304 is a synthetic inhibitor designed to interact with the ATP-binding site of <b>wild type and V600E mutant BRAF</b> with IC50 values of 79 nM and 38 nM, respectively. It also inhibits <b>CRAF, p38 and CSF1R</b> at sub 100 nM potencies.	451.52	942507-42-8	C27H25N5O2_x000D_	COC1=CC2=C(C=C1)C(=NC=N2)NC3=CC(=CC=C3C)NC(=O)C4=CC=CC(=C4)C(C)(C)C#N	61.1807	26.431
Scutellarein	Src	Cancer	Scutellarein reduces inflammatory responses by inhibiting Src kinase activity.	286.236	529-53-3	C15H10O6	OC1=CC=C(C=C1)C2=CC(=O)C3=C(O2)C=C(O)C(=C3O)O	42.0184	4.87303
PP2	Src	Angiogenesis	PP2, a Src family kinase inhibitor, potently inhibits Lck/Fyn with IC50 of 4 nM/5 nM in cell-free assays, ~100-fold less potent to EGFR, inactive for ZAP-70, JAK2 and PKA.	301.77	172889-27-9	C15H16ClN5	CC(C)(C)[N]1N=C(C2=CC=C(Cl)C=C2)C3=C(N)N=CN=C13	18.2375	16.5641
Picropodophyllin (PPP)	IGF-1R	Protein Tyrosine Kinase	Picropodophyllin (PPP) is a IGF-1R inhibitor with IC50 of 1 nM. It displays selectivity for IGF-1R and does not coinhibit tyrosine phosphorylation the IR, or of a selected panel of receptors less related to IGF-IR(FGF-R, PDGF-R, OR EGF-R).	414.41	477-47-4	C22H22O8	COC1=CC(=CC(=C1OC)OC)C2C3C(COC3=O)C(O)C4=CC5=C(OCO5)C=C24	61.6941	33.3835
TBHQ	Nrf2	Immunology & Inflammation	Tert-butylhydroquinone (TBHQ) is an antioxidant compound which is used to prevent lipid peroxidation and shows multiple cytoprotective actions. It is an activator of Nrf2.	166.22	1948-33-0	C10H14O2	CC(C)(C)C1=C(O)C=CC(=C1)O	34.9569	6.21267
Imatinib (STI571)	PDGFR	Protein Tyrosine Kinase	Imatinib (STI571) is a multi-target inhibitor of tyrosine kinase with inhibition for v-Abl, c-Kit and PDGFR, IC50 values are 0.6 μM, 0.1 μM and 0.1 μM in cell-free or cell-based assays, respectively.	493.6	152459-95-5	C29H31N7O	CN1CCN(CC1)CC2=CC=C(C=C2)C(=O)NC3=CC=C(C)C(=C3)NC4=NC=CC(=N4)C5=CC=CN=C5	68.0691	17.8306
WAY-277054	tyrosine kinase	Protein Tyrosine Kinase	tyrosine kinase inhibitors; tyrosine kinase inhibitors;	379.859	753467-39-9	C16H11ClFN3OS2	FC1=CC(=CC=C1)CSC2=NN=C(NC(=O)C3=CC=CC=C3Cl)S2	31.2076	19.6607
Bikinin	GSK-3	PI3K/Akt/mTOR	Bikinin is an ATP-competitive Arabidopsis GSK-3 inhibitor, and acts as a strong activator of brassinosteroid (BR) signaling.	273.08	188011-69-0	C9H9BrN2O3	OC(=O)CCC(=O)NC1=NC=C(Br)C=C1	-14.2104	21.0954
WAY-655978	ROCK, ERK, GSK, and AGC	Cell Cycle,TGF-beta/Smad ,Stem Cells & Wnt,MAPK	inhibitor of ROCK, ERK, GSK, and AGC protein kinases	329.804	692869-98-0	C16H12ClN3OS	ClC1=C(CC(=O)NC2=NC(=CS2)C3=CC=NC=C3)C=CC=C1	22.25	11.2271
Dovitinib (TKI-258) Dilactic Acid	c-Kit,FGFR,FLT3,PDGFR,VEGFR	Angiogenesis	Dovitinib Dilactic acid (TKI258 Dilactic acid) is the Dilactic acid of Dovitinib, which is a multitargeted RTK inhibitor, mostly for class III (FLT3/c-Kit) with IC50 of 1 nM/2 nM, also potent to class IV (FGFR1/3) and class V (VEGFR1-4) RTKs with IC50 of 8-13 nM, less potent to InsR, EGFR, c-Met, EphA2, Tie2, IGFR1 and HER2. Phase 4.	572.59	852433-84-2	C27H33FN6O7	CC(O)C(O)=O.CC(O)C(O)=O.CN1CCN(CC1)C2=CC=C3N=C([NH]C3=C2)C4=C(N)C5=C(NC4=O)C=CC=C5F	65.0033	-0.26112
bpV (HOpic)	PTEN	Others	bpV (HOpic) is a potent inhibitor of PTEN with an IC50 of 14 nM. The IC50s for PTP-β and PTP-1B are about 350- and 1800-fold higher than the IC50 for PTEN, respectively.	347.24	722494-26-0	C6H4K2NO8V	[K+].[K+].OC1=CC=C2N(=C1)|[V+3]|3|4(|[O-][O-]|3)(|[O-][O-]|4)(|[O-]C2=O)=O	35.7164	-30.3954
WYE-163716-A	rRNA ErmC' methyltransferase,F508del-CFTR,PI3Kγ	Transmembrane Transporters,PI3K/Akt/mTOR	inhibitor of the rRNA ErmC' methyltransferase; corrector of the F508del-CFTR folding defect and antiviral; PI3Kγ modulator;	346.427	92902-64-2	C15H14N4O2S2	CC(=O)NC1=NC(=C(S1)C2=CSC(=N2)NC3=CC(=CC=C3)O)C	24.6844	-3.41545
Sophocarpine	Others	Others	Sophocarpine, a major ingredient of Sophora alopecuroides, has a wide range of pharmacological effects.	246.35	6483-15-4	C15H22N2O	O=C1C=CCC2C3CCCN4CCCC(CN12)C34	15.2319	17.0716
Golvatinib (E7050)	c-Met,VEGFR	Protein Tyrosine Kinase	Golvatinib (E7050) is a dual c-Met and VEGFR-2 inhibitor with IC50 of 14 nM and 16 nM, does not inhibit bFGF-stimulated HUVEC growth (up to 1000 nM). Phase 1/2.	633.69	928037-13-2	C33H37F2N7O4	CN1CCN(CC1)C2CCN(CC2)C(=O)NC3=NC=CC(=C3)OC4=CC(=C(NC(=O)C5(CC5)C(=O)NC6=CC=C(F)C=C6)C=C4)F	79.7184	30.7944
Borussertib	Akt	PI3K/Akt/mTOR	Borussertib is a covalent-allosteric inhibitor of <b>protein kinase Akt</b> with an IC50 of 0.8 nM and a Ki of 2.2 nM for WT Akt.	596.68	1800070-77-2	C36H32N6O3_x000D_	C=CC(=O)NC1=CC2=C(NC(=O)N2C3CCN(CC3)CC4=CC=C(C=C4)C5=NC6=C(C=C5C7=CC=CC=C7)C(=O)NC=C6)C=C1	35.3005	16.1942
SRX3207	Syk	Angiogenesis	SRX3207 is an orally active dual inhibitor of <b>Syk-PI3K</b> with IC50 of 39.9 nM, 31200 nM, 3070 nM, 3070 nM, 244 nM, 388 nM, 9790 nM for <b>Syk</b>, <b>Zap70</b>, <b>BRD41</b>, <b>BRD42</b>, <b>PI3K alpha</b>, <b>PI3K delta</b>, <b>PI3K gamma</b>, respectively. SRX3207 blocks tumor immunosuppression and increases anti-tumor immunity.	555.65	2254693-15-5	C29H29N7O3S	CC1=N[N](C=C1CN2CCC2)C3=CC=NC(=N3)NC4=CC=C(C=C4)C5=CSC6=C5OC(=CC6=O)N7CCOCC7	29.6326	-4.22922
GI-505946	p38	MAPK	inhibitors of p38	282.125	13142-47-7	C12H9Cl2N3O	ClC1=CC=C(NC(=O)NC2=CC=NC=C2)C=C1Cl	14.9489	12.5168
Fingolimod (FTY720) HCl	S1P Receptor	GPCR & G Protein	Fingolimod (FTY720) HCl is a S1P antagonist with IC50 of 0.033 nM in K562, and NK cells.	343.9	162359-56-0	C19H34ClNO2	Cl.CCCCCCCCC1=CC=C(CCC(N)(CO)CO)C=C1	-1.26607	5.43843
WAY-621129	SIRT6,BCRP/ABCG2,CK2,HIV-1 protease,CDK	DNA Damage & Epigenetics,Metabolism,Microbiology,Cell Cycle	Cytotoxicity against breast cancer cell lines MCF-7; antioxidant; SIRT6 inhibitor; inhibitor of BCRP/ABCG2; CK2 inhibitor; HIV-1 protease inhibitor; CDK inhibitor;	268.264	6889-78-7	C16H12O4	COC1=CC=C(C=C1)C2=C(O)C(=O)C3=C(O2)C=CC=C3	12.8402	3.04134
CEP-33779	JAK	JAK/STAT	CEP33779 is a selective JAK2 inhibitor with IC50 of 1.8 nM, >40- and >800-fold versus JAK1 and TYK2.	462.57	1257704-57-6	C24H26N6O2S	CN1CCN(CC1)C2=CC=CC(=C2)NC3=N[N]4C=CC=C(C5=CC=C(C=C5)[S](C)(=O)=O)C4=N3	39.6983	22.3535
WAY-325065	MtSk	Others	altering the lifespan of a eukaryotic organism; Mycobacterium tuberculosis shikimate kinase (MtSk) inhibitor;	339.418	689762-76-3	C16H17N7S	CC1=CC(=CC=C1)NC2=NC(=NC(=N2)CSC3=NC(=CC=N3)C)N	12.6154	50.7444
ZM 336372	Raf	MAPK	ZM 336372 is a potent and selective c-Raf inhibitor with IC50 of 70 nM, 10-fold selectivity over B-RAF, no inhibition to PKA/B/C, AMPK, p70S6, etc.	389.45	208260-29-1	C23H23N3O3	CN(C)C1=CC=CC(=C1)C(=O)NC2=CC(=C(C)C=C2)NC(=O)C3=CC=C(O)C=C3	47.7305	0.133514
Danthron	Others	Others	Danthron is an organic substance. It used to be a laxatica and now is currently used as an antioxidant in synthetic lubricants, in the synthesis of experimental antitumor agents, as a fungicide and as an intermediate for making dyes.	240.21	117-10-2	C14H8O4	OC1=CC=CC2=C1C(=O)C3=C(O)C=CC=C3C2=O	6.61557	-3.16067
WAY-652848	SRPK kinase	others	SRPK kinase inhibitor	354.324	848057-98-7	C17H17F3N2O3	CC1=CC=C(O1)C(=O)NC2=C(C=CC(=C2)C(F)(F)F)N3CCOCC3	8.36376	-5.82318
WAY-612763	YycG histidine kinase	Others	altering the lifespan of eukaryotic organisms; YycG histidine kinase inhibitors;	481.809	479060-67-8	C21H15ClF3N3O5	CC1=C(NC(=O)C2=CC=CO2)C=C(C=C1)C(=O)OCC(=O)NC3=C(Cl)C=C(C=N3)C(F)(F)F	-12.4724	8.68874
NVP-BSK805 2HCl	JAK	JAK/STAT	NVP-BSK805 2HCl is a potent and selective ATP-competitive JAK2 inhibitor with IC50 of 0.5 nM,>20-fold selectivity towards JAK1, JAK3 and TYK2.	563.47	1092499-93-8 (free base)	C27H30Cl2F2N6O	Cl.Cl.FC1=C(CN2CCOCC2)C(=CC(=C1)C3=C4N=C(C=NC4=CC=C3)C5=C[N](N=C5)C6CCNCC6)F	56.3424	-0.860668
Ruxolitinib Phosphate	JAK	JAK/STAT	Ruxolitinib Phosphate is the phosphate salt form of ruxolitinib, an orally bioavailable Janus-associated kinase (JAK) inhibitor with potential antineoplastic and immunomodulating activities.	404.36	1092939-17-7	C17H21N6O4P	O[P](O)(O)=O.N#CCC(C1CCCC1)[N]2C=C(C=N2)C3=NC=NC4=C3C=C[NH]4	78.7982	38.5273
WAY-650313	Casein kinase 1δ	Metabolism	Casein kinase 1δ inhibitors	371.407	847772-08-1	C23H18FN3O	FC1=CC(=CC=C1)\C=C(C(=O)NCC2=CC=CC=C2)/C3=NC4=C([NH]3)C=CC=C4	3.05471	16.403
Biochanin A	FAAH	Metabolism	Biochanin A, an O-methylated isoflavone from Trifolium pratense, inhibits protein tyrosine kinase (PTK) of epidermal growth factor receptor with IC50 values of 91.5 &muM.	284.26	491-80-5	C16H12O5	COC1=CC=C(C=C1)C2=COC3=CC(=CC(=C3C2=O)O)O	39.9768	9.66079
WAY-325185	VEGFR	Protein Tyrosine Kinase & Angiogenesis	altering the lifespan of a eukaryotic organism; inhibitor of VEGFR;	343.38	342785-98-2	C17H21N5O3	CN1C(=O)N(C)C2=C([N](CC(O)CNC3=CC(=CC=C3)C)C=N2)C1=O	12.7953	31.397
GSK621	AMPK	PI3K/Akt/mTOR	GSK621 is a specific and potent AMPK activator.	489.91	1346607-05-3	C26H20ClN3O5	COC1=CC(=CC=C1)N2C(=O)NC3=C([N](C(=C3)Cl)C4=CC=C(C=C4)C5=C(O)C(=CC=C5)OC)C2=O	34.167	31.0176
STO-609	CaMK	Neuronal Signaling	STO-609 is a specific inhibitor of the Ca2+/Calmodulin-dependent protein kinase kinase(CaM-KK) that inhibits the activities of recombinant CaM-KKα and CaM-KKβ isoforms, with Ki values of 80 and 15 ng/ml, respectively, and also inhibits their autophosphorylation activities.	314.29	52029-86-4	C19H10N2O3	OC(=O)C1=CC=C2C3=NC4=C(C=CC=C4)[N]3C(=O)C5=C2C1=CC=C5	93.9943	41.4126
WAY-329341	Abl	Angiogenesis	ABL kinase inhibiting activities	453.532	943931-29-1	C28H27N3O3	COC1=C(CNC(=O)C2C(N(C)C(=O)C3=CC=CC=C23)C4=C[N](C)C5=C4C=CC=C5)C=CC=C1	-0.820231	24.9656
WAY-642481	CDK	Cell Cycle	CDK9 Inhibitors; Antimalaria agent;	296.387	22312-45-4	C17H16N2OS	CN1C(=O)C2=C(C=CC=C2)N=C1SCC3=CC=C(C)C=C3	25.4448	11.0604
KU-55933 (ATM Kinase Inhibitor)	ATM/ATR	DNA Damage	KU-55933 (ATM Kinase Inhibitor) is a potent and specific ATM inhibitor with IC50/Ki of 12.9 nM/2.2 nM in cell-free assays, and is highly selective for ATM as compared to DNA-PK, PI3K/PI4K, ATR and mTOR.	395.49	587871-26-9	C21H17NO3S2	O=C1C=C(OC(=C1)C2=CC=CC3=C2SC4=CC=CC=C4S3)N5CCOCC5	30.524	-3.44343
PIK-III	Autophagy,PI3K	Autophagy	PIK-III, which is a selective inhibitor of ?VPS34 enzymatic activity, inhibits autophagy and de novo lipidation of LC3 and leads to the stabilization of autophagy substrates. The IC50 values for VPS34 and PI(3)Kδ are 0.018 μM and 1.2 μM respectively.	319.36	1383716-40-2	C17H17N7	NC1=NC=C(C(=N1)CC2CC2)C3=CC=NC(=N3)NC4=CC=NC=C4	28.2628	81.5869
CCG-203971	Rho	Cell Cycle	CCG-203971 is a novel small-molecule inhibitor of the Rho/MRTF/SRF pathway with the IC50 value of 0.64 μM for SRE.L. It inhibits Rho-mediated gene transcription.	408.88	1443437-74-8	C23H21ClN2O3	ClC1=CC=C(NC(=O)C2CCCN(C2)C(=O)C3=CC(=CC=C3)C4=CC=CO4)C=C1	79.9474	4.60297
WAY-353591	Casein kinase 1d	Metabolism	Casein kinase 1d inhibitors	297.35	454427-09-9	C16H12FN3S	FC1=CC=C(NC(=S)NC2=CC=CC3=C2C=CN=C3)C=C1	27.0137	3.0052
Esculetin	Lipoxygenase	Metabolism	Esculetin is a coumarin derivative found in various natural plant products with various biological and pharmaceutical properties including anti-edema, anti-inflammatory and anti-tumour effects. It inhibits lipoxygenases (LOs).	178.14	305-01-1	C9H6O4	OC1=CC2=C(C=CC(=O)O2)C=C1O	6.16522	11.1245
TH-257	LIM kinase	Cell Cycle	TH-257 is a potent and exquisitely selective <b>LIM kinase (LIMK)</b> inhibitor with IC50 of 84 nM and 39 nM for LIMK1 and LIMK2, respectively.	422.54	2244678-29-1	C24H26N2O3S_x000D_	CCCCN(CC1=CC=CC=C1)C(=O)C2=CC=C(C=C2)[S](=O)(=O)NC3=CC=CC=C3	20.9604	-3.12286
DB07268	JNK	MAPK	DB07268 is a potent and selective <b>JNK1</b> inhibitor with an IC50 value of 9 nM and exhibits at least 70- to 90-fold greater potency against JNK1 than CHK1, CK2, and PLK.	321.33	929007-72-7	C17H15N5O2_x000D_	NC(=O)C1=CC=CC=C1NC2=NC(=NC=C2)NC3=CC=CC(=C3)O	34.4356	5.97555
WAY-639405	tyrosine kinase,phosphodiesterase V	Protein Tyrosine Kinase	tyrosine kinase inhibitor; phosphodiesterase V inhibitor;	390.458	796052-04-5	C21H18N4O2S	CC1=C(C)C2=C(S1)N=C(N=C2NCC3=CC4=C(OCO4)C=C3)C5=CN=CC=C5	18.1315	12.3206
WAY-329340	Abl	Angiogenesis	ABL kinase inhibiting activities	389.49	943931-23-5	C24H27N3O2	CCC(C)NC(=O)C1C(N(C)C(=O)C2=CC=CC=C12)C3=C[N](C)C4=C3C=CC=C4	-5.24378	43.4612
WAY-302159	VEGFR-2	others	novel VEGFR-2 inhibitors	293.277	62802-77-1	C16H11N3O3	[O-][N+](=O)C1=CC=CC(=C1)C(=O)NC2=CC=CC3=CC=CN=C23	12.9904	3.83867
Fingolimod	S1P Receptor	Neuronal Signaling	Fingolimod is a sphingosine 1-phosphate receptor modulator used for the treatment of relapsing-remitting multiple sclerosis.	307.47	162359-55-9	C19H33NO2	CCCCCCCCC1=CC=C(CCC(N)(CO)CO)C=C1	21.302	16.4793
SBI-0206965	Autophagy	Autophagy	SBI-0206965 is a highly selective autophagy kinase ULK1 inhibitor with IC50 of 108 nM, about 7-fold selectivity over ULK2.	489.32	1884220-36-3	C21H21BrN4O5	CNC(=O)C1=CC=CC=C1OC2=NC(=NC=C2Br)NC3=CC(=C(OC)C(=C3)OC)OC	37.1012	19.2867
CCT245737	Chk	Cell Cycle	CCT245737 is an orally active CHK1 inhibitor with The IC50 of 1.4 nM. It exhibits >1,000-fold selectivity against CHK2 and CDK1.	379.34	1489389-18-5	C16H16F3N7O	FC(F)(F)C1=CN=C(NC2=CN=C(C=N2)C#N)C=C1NCC3CNCCO3	16.1816	-1.54605
WAY-647361	PI3K	PI3K/Akt/mTOR	PI3 kinase inhibitors; PI3 kinase inhibitors;	194.144	852399-94-1	C8H6N2O4	CC1=C(C(O)=O)C2=C(O1)N=CNC2=O	-3.38486	8.66735
ASP5878	FGFR	Protein Tyrosine Kinase	ASP5878 is a novel <b>FGFR</b>-selective inhibitor with IC50 values of 0.47, 0.60, 0.74, and 3.5 nmol/L for recombinant FGFR1, 2, 3, and 4, respectively.	407.37	1453208-66-6	C18H19F2N5O4	COC1=C(F)C(=C(F)C(=C1)OC)COC2=CN=C(NC3=C[N](CCO)N=C3)N=C2	39.444	11.9916
GW406108X	Kinesin	Cytoskeletal Signaling	GW406108X (GW108X) is an inhibitor of Kif15 (Kinesin-12) with an IC50 of 0.82 μM in the ATPase assay. GW406108X inhibits recombinant ULK1 kinase activity with a pIC50 of 6.37 and blocks autophagy in cells, without affecting the upstream signalling kinases mTORC1 and AMPK.	400.21	1644443-92-4	C20H11Cl2NO4_x000D_	OC1=C(Cl)C=C(C=C1Cl)/C=C/2C(=O)NC3=C2C=C(C=C3)C(=O)C4=CC=CO4	20.6818	-2.98372
STAT3-IN-1	STAT	JAK/STAT	STAT3-IN-1 (compound 7d) is an excellent, selective and orally active inhibitor of STAT3 with IC50 of 1.82 μM and 2.14 μM in HT29 and MDA-MB 231 cells, respectively. STAT3-IN-1 induces apoptosis of tumor cells.	475.53	2059952-75-7	C28H29NO6_x000D_	COC1=CC(=CC(=C1)OC)\C=C\C2=CC=C(NC(=O)\C=C\C3=CC(=C(OC)C(=C3)OC)OC)C=C2	58.7664	19.7523
MCB-613	Others	Others	MCB-613 is a potent steroid receptor coactivator (SRC) stimulator.	304.39	1162656-22-5	C20H20N2O	CCC1C\C(=C/C2=CC=CN=C2)C(=O)C(/C1)=C/C3=CN=CC=C3	67.6713	27.0711
eFT-508 (eFT508)	MNK	MAPK	eFT-508 (eFT508) is a potent and selective MNK1/2 inhibitor with IC50s of 2.4 nM and 1 nM, respectively. It potentially results in decreased tumor cell proliferation and tumor growth.	340.38	1849590-01-7	C17H20N6O2	CC1=C2N(C(=O)C(=C1)NC3=NC=NC(=C3)N)C4(CCCCC4)NC2=O	25.0658	7.16836
CCT128930	Akt	PI3K/Akt/mTOR	CCT128930 is a potent, ATP-competitive and selective inhibitor of Akt2 with IC50 of 6 nM in a cell-free assay, 28-fold greater selectivity for Akt2 than the closely related PKA kinase.	341.84	885499-61-6	C18H20ClN5	NC1(CCN(CC1)C2=C3C=C[NH]C3=NC=N2)CC4=CC=C(Cl)C=C4	63.4749	13.8772
WAY-302888	others	serine/threonine protein kinases	Inhibitors of mycobacterial serine/threonine protein kinases	292.42	331964-66-0	C14H16N2OS2	CC1CCC2=C(C1)C3=C(NC(=S)N(CC=C)C3=O)S2	22.3055	9.51329
WAY-328158	BCR-ABL	Angiogenesis & Cytoskeletal Signaling & TGF-beta/Smad	Inhibitor for BCR-ABL Kinase	385.412	688050-42-2	C19H16FN3O3S	NC(=O)C1=C(NC(=O)C2=NOC(=C2)C3=CC=C(F)C=C3)SC4=C1CCCC4	-1.39604	26.2624
Benzamidine HCl	Serine/threonin kina	Proteases	Benzamidine is an inhibitor of <b>serine proteases</b> with Ki values of 35, 350, and 220 µM for trypsin, plasmin, and thrombin, respectively.	156.61	1670-14-0	C7H9ClN2_x000D_	Cl.NC(=N)C1=CC=CC=C1	25.4152	37.0806
WAY-320951	Bacterial Thymidine Kinase	Microbiology,cancer	Bacterial Thymidine Kinase Inhibitors; antitumor agents;	317.32	430444-03-4	C14H11N3O4S	OC1=C(O)C=C(C=C1)C(=O)CSC2=NN=C([NH]2)C3=CC=CO3	20.063	22.9947
Homoplantaginin	Others	Others	Homoplantaginin has a protective and therapeutic effect on hepatocyte injury, which might be associated with its antioxidant properties. Homoplantaginin ameliorates endothelial insulin resistance by inhibiting inflammation and modulating cell signalling via the IKKβ/IRS-1/pAkt/peNOS pathway, suggesting it may be used for the prevention and treatment of endothelial dysfunction associated with insu…	462.403	17680-84-1	C22H22O11	COC1=C(OC2OC(CO)C(O)C(O)C2O)C=C3OC(=CC(=O)C3=C1O)C4=CC=C(O)C=C4	32.1121	-6.44303
Momelotinib (CYT387)	JAK	JAK/STAT	Momelotinib (CYT387) is an ATP-competitive inhibitor of JAK1/JAK2 with IC50 of 11 nM/18 nM, ~10-fold selectivity versus JAK3. Phase 3.	414.46	1056634-68-4	C23H22N6O2	O=C(NCC#N)C1=CC=C(C=C1)C2=NC(=NC=C2)NC3=CC=C(C=C3)N4CCOCC4	58.8937	33.3792
4',7-Dimethoxy-5-Hydroxyflavone	Others	Others	4',7-Dimethoxy-5-Hydroxyflavone (apigenin dimethylether) inhibits α-glucosidase and α-amylase enzymes and enhances 2-NBDG uptake in L6 cells.	298.29	5128-44-9	C17H14O5	COC1=CC=C(C=C1)C2=CC(=O)C3=C(O2)C=C(OC)C=C3O	19.9554	35.0077
6-Benzylaminopurine	ROS	Immunology & Inflammation	6-Benzylaminopurine is a first-generation synthetic cytokinin which could regulate the activities of the antioxidant defense system of plants.Its treatment elicits plant growth and development.	225.25	1214-39-7	C12H11N5	C(NC1=NC=NC2=C1[NH]C=N2)C3=CC=CC=C3	42.9378	28.2501
WAY-278752	IGF1R	Others	inhibit the activity of IGF1R kinase	340.181	331652-38-1	C14H7Cl2NO3S	ClC1=CC=CC(=C1Cl)C2=CC=C(O2)\C=C/3SC(=O)NC3=O	67.4538	19.3778
WAY-320509	CDK8	Microbiology;,Cell Cycle	anti-HIV infection; CDK8 and/or CDK19 inhibitors; anti-virus; anti-virus;	339.411	314035-54-6	C18H17N3O2S	COC1=CC=C(C=C1)C2=C3C(=C(SC3=NC(=C2)C4CC4)C(N)=O)N	32.0211	6.01794
Ilaprazole sodium	Proton Pump	Transmembrane Transporters	Ilaprazole sodium is the sodium salt form of ilaprazole, which is a <b>proton pump</b> inhibitor.	388.42	172152-50-0	C19H17N4NaO2S	COC1=C(C)C(=NC=C1)C[S](=O)C2=NC3=C(C=CC(=C3)[N]4C=CC=C4)[N]2[Na]	22.4093	6.24851
Ipatasertib (GDC-0068)	Akt	PI3K/Akt/mTOR	Ipatasertib (GDC-0068) is a highly selective pan-Akt inhibitor targeting Akt1/2/3 with IC50 of 5 nM/18 nM/8 nM in cell-free assays, 620-fold selectivity over PKA. Phase 2.	458	1001264-89-6	C24H32ClN5O2	CC(C)NCC(C(=O)N1CCN(CC1)C2=C3C(C)CC(O)C3=NC=N2)C4=CC=C(Cl)C=C4	6.51284	3.49617
LY2584702 Tosylate	S6 Kinase	PI3K/Akt/mTOR	LY2584702 Tosylate is a selective, ATP-competitive <B>p70S6K inhibitor with IC50 of 4 nM. Phase 1.	617.62	1082949-68-5	C28H27F4N7O3S	C[N]1C=C(N=C1C2CCN(CC2)C3=NC=NC4=C3C=N[NH]4)C5=CC(=C(F)C=C5)C(F)(F)F.CC6=CC=C(C=C6)[S](O)(=O)=O	12.5066	34.7834
Lorlatinib?(PF-6463922)	ALK	Protein Tyrosine Kinase	PF-06463922 is a potent, dual ALK/ROS1 inhibitor with Ki of <0.02 nM, <0.07 nM, and 0.7 nM for ROS1, ALK (WT), and ALK (L1196M), respectively. Phase 1.	406.41	1454846-35-5	C21H19FN6O2	CC1OC2=C(N)N=CC(=C2)C3=C(C#N)[N](C)N=C3CN(C)C(=O)C4=C1C=C(F)C=C4	3.32668	16.3809
BQU57	Rho	Cell Cycle	BQU57, a derivative of RBC8, is a selective GTPase Ral inhibitor relative to the GTPases Ras and RhoA.	334.1	1637739-82-2	C16H13F3N4O	C[N]1N=C(C)C2=C1OC(=C(C#N)C2C3=CC=C(C=C3)C(F)(F)F)N	23.5005	17.3301
IMM-H007	AMPK	PI3K/Akt/mTOR	IMM-H007, an adenosine derivative, is an activator of AMP-Activated Protein Kinase (AMPK). IMM-H007 is a potential drug for treating cardiac dysfunction. IMM-H007 negatively regulates endothelium inflammation through inactivating NF-κB and JNK/AP1 signaling. IMM-H007 inhibits ABCA1 (ATP binding cassette subfamily a member 1) degradation and facilitates its cell-surface localization in macrophages…	485.45	1221412-23-2	C22H23N5O8_x000D_	CC(=O)OCC1OC(C(OC(C)=O)C1OC(C)=O)[N]2C=NC3=C(NC4=CC=CC(=C4)O)N=CN=C23	33.639	-5.65678
CFI-400945	PLK	Cell Cycle	CFI-400945 is an orally active, potent and selective polo-like kinase 4(PLK4) inhibitor with Ki value of 0.26 nM.	534.65	1338806-73-7	C33H34N4O3	COC1=CC2=C(NC(=O)C23CC3C4=CC=C5C(=C4)[NH]N=C5\C=C\C6=CC=C(CN7CC(C)OC(C)C7)C=C6)C=C1	37.4666	30.5328
WAY-647636	Casein kinase 1δ	Metabolism	Casein kinase 1δ inhibitors; anthelmintic and insecticidal; anthelmintic and insecticidal agents;	430.479	556055-08-4	C23H18N4O3S	O=C(CSC1=NN=C([N]1C2=CC=CC=C2)C3=CC=NC=C3)C4=CC=C5OCCOC5=C4	-5.23235	24.8717
GI-570482	ExoS ADPRT,MET,USP14	Protein Tyrosine Kinase,Angiogenesis	ExoS ADPRT inhibitor; affect signal transduction downstream of the MET receptor; affect signal transduction downstream of the MET receptor; USP14 inhibitor;	278.327	109164-47-8	C13H14N2O3S	OC(=O)CCC1=NC2=C(C(=O)N1)C3=C(CCCC3)S2	28.0793	-12.3157
Mobocertinib (TAK788)	EGFR	Protein Tyrosine Kinase	Mobocertinib (TAK788), an investigational TKI, is a potent, selective preclinical inhibitor of <b>epidermal growth factor receptor (EGFR)</b> and <b>HER2</b> mutations. Mobocertinib (TAK788) is an antineoplastic agent.	585.7	1847461-43-1	C32H39N7O4_x000D_	COC1=C(NC2=NC=C(C(=O)OC(C)C)C(=N2)C3=C[N](C)C4=CC=CC=C34)C=C(NC(=O)C=C)C(=C1)N(C)CCN(C)C	7.6363	-3.21959
O-304	AMPK	PI3K/Akt/mTOR	O-304 (O-304X) is an orally available pan-activator of <b>AMPK activated protein kinase (AMPK)</b>. O-304 (O-304X) exhibits a great potential as a novel drug to treat type 2 diabetes (T2D) and associated cardiovascular complications.	380.25	1261289-04-6	C16H11Cl2N3O2S_x000D_	ClC1=CC=C(CN2SC(=NC2=O)NC(=O)C3=CC=C(Cl)C=C3)C=C1	84.7003	6.88396
WAY-626116	Casein kinase 1d	Metabolism	Casein kinase 1d inhibitors	443.471	753468-25-6	C20H14FN3O4S2	FC1=CC=C(C=C1)C2=CSC3=C2C(=NC=N3)N[S](=O)(=O)C4=CC5=C(OCCO5)C=C4	13.3231	-25.8681
WAY-639932	Casein kinase 1δ	Metabolism	Casein kinase 1δ inhibitor	336.434	851467-69-1	C17H12N4S2	CC1=CC=C(C=C1)C2=CSC3=C2C(=NC=N3)SC4=NC=CC=N4	-12.1388	13.6912
AY-20590	Mcl-,PDGFR	Apoptosis,Microbiology,cancer, Protein Tyrosine Kinase,Angiogenesis	inhibitors of Mcl-1 (for the treatment of cancer and other diseases); antibacterial activity/anti-cancer activity; potential influenza NS1A protein inhibitors; potential influenza NS1A protein inhibitors; potential influenza NS1A protein inhibitors; altering the lifespan of a eukaryotic organism; antispasmodic activities (止痉挛); PDGFR inhibitors .	262.263	57490-73-0	C16H10N2O2	O1C=CC=C1C2=NC3=CC=CC=C3N=C2C4=CC=CO4	38.8818	8.2815
BMS-345541	IκB/IKK	NF-κB	BMS-345541 is a highly selective inhibitor of the catalytic subunits of IKK-2 and IKK-1 with IC50 of 0.3 μM and 4 μM in cell-free assays, respectively.	255.32	445430-58-0	C14H17N5	CC1=CC=C2N=C(NCCN)C3=NC=C(C)[N]3C2=C1	54.9851	40.1085
Senexin A	CDK	Cell Cycle	Senexin A is a potent and selective inhibitor of CDK8 and its nearest relative, CDK19 with Kd values of 0.83 μM and 0.31 μM for CDK8 and CDK19 ATP site binding, respectively.	274.32	1366002-50-7	C17H14N4	N#CC1=CC=C2N=CN=C(NCCC3=CC=CC=C3)C2=C1	88.8791	27.1274
WAY-326893	kinase	Others	altering the lifespan of a eukaryotic organism; kinase inhibitory activity;	375.465	685865-73-0	C17H17N3O3S2	CCC1=CC=C(NC(=O)CC[S](=O)(=O)C2=CC=CC3=NSN=C23)C=C1	10.2521	10.1489
NG 52	Others	Others	NG-52 is a tri-substituted purine that binds to the ATP-binding site of yeast cyclin-dependent kinases, inhibiting Cdc28p and Pho85p with IC50s of 7 and 2 μM, respectively.	346.81	212779-48-1	C16H19ClN6O	CC(C)[N]1C=NC2=C1N=C(NCCO)N=C2NC3=CC(=CC=C3)Cl	9.92063	24.6458
WAY-656283	p38	MAPK	p38 kinase inhibitor	249.286	263270-62-8	C12H11NO3S	CC1=NC(=CS1)COC2=CC=C(C=C2)C(O)=O	3.45155	12.1784
WAY-321002	EGFR,PDE-5,TGF-β,p38-α,	Protein Tyrosine Kinase , Angiogenesis , JAK/STAT	EGFR inhibitors; protein tyrosine phosphatase inhibitor; PDE-5 inhibitors; altering the lifespan of a eukaryotic organism; inhibitors of TGF-β; TGF-β and/or p38-α kinase inhibitors; cGMP-PDE inhibitor;	312.368	166039-38-9	C20H16N4	C(NC1=NC(=NC2=CC=CC=C12)C3=CC=CC=C3)C4=CC=CN=C4	25.5163	22.8933
PS-1145	IκB/IKK	NF-κB	PS-1145 is a specific IKK inhibitor with IC50 of 88 nM.	322.75	431898-65-6	C17H11ClN4O	ClC1=CC(=C2[NH]C3=C(C=CN=C3)C2=C1)NC(=O)C4=CN=CC=C4	20.7841	30.7361
WYE-175765	JAK3,YopH	JAK/STAT & Epigenetics & Angiogenesis & Stem Cells & Wnt,Microbiology	JAK3 and YopH inhibitor; antibacterial and analgesic agent;	323.321	956236-35-4	C14H13NO6S	COC1=CC=C(N[S](=O)(=O)C2=CC(=C(O)C=C2)C(O)=O)C=C1	-13.236	3.50862
WAY-380153	FKBP12	PI3K/Akt/mTOR	FKBP12 Inhibitors	271.763	363160-12-7	C12H14ClNO2S	ClC1=CC=C(SCC(=O)N2CCOCC2)C=C1	8.95069	-4.04803
WAY-326894	kinase	Others	kinase inhibitory activity	365.402	685865-75-2	C15H12FN3O3S2	FC1=CC=CC(=C1)NC(=O)CC[S](=O)(=O)C2=CC=CC3=NSN=C23	3.78326	20.4975
BS-181 HCl	CDK	Cell Cycle	BS-181 HCl is a highly selective CDK7 inhibitor with IC50 of 21 nM. It is more than 40-fold selective for CDK7 than CDK1, 2, 4, 5, 6, or 9.	416.99	1397219-81-6	C22H33ClN6	Cl.CC(C)C1=C2N=C(NCCCCCCN)C=C(NCC3=CC=CC=C3)[N]2N=C1	25.8473	7.9821
Luminespib (AUY-922, NVP-AUY922)	HSP (e.g. HSP90)	Cytoskeletal Signaling	Luminespib (AUY-922, NVP-AUY922) is a highly potent HSP90 inhibitor for HSP90α/β with IC50 of 13 nM /21 nM in cell-free assays, weaker potency against the HSP90 family members GRP94 and TRAP-1, exhibits the tightest binding of any small-molecule HSP90 ligand. Phase 2.	465.54	747412-49-3	C26H31N3O5	CCNC(=O)C1=NOC(=C1C2=CC=C(CN3CCOCC3)C=C2)C4=CC(=C(O)C=C4O)C(C)C	12.1892	-6.87611
GNF-2	Bcr-Abl	Angiogenesis	GNF-2 is a highly selective non-ATP competitive inhibitor of Bcr-Abl, shows no activity to Flt3-ITD, Tel-PDGFR, TPR-MET and Tel-JAK1 transformed tumor cells.	374.32	778270-11-4	C18H13F3N4O2	NC(=O)C1=CC=CC(=C1)C2=NC=NC(=C2)NC3=CC=C(OC(F)(F)F)C=C3	13.5592	-5.57095
Rigosertib (ON-01910)	PLK	Cell Cycle	Rigosertib (ON-01910) is a non-ATP-competitive inhibitor of PLK1 with IC50 of 9 nM in a cell-free assay. It shows 30-fold greater selectivity against Plk2 and no activity to Plk3. Phase 3.	473.47	1225497-78-8	C21H24NNaO8S	[Na+].COC1=CC(=C(\C=C\[S](=O)(=O)CC2=CC=C(OC)C(=C2)NCC([O-])=O)C(=C1)OC)OC	85.3382	47.0164
WAY-600868	FGFR3	Protein Tyrosine Kinase	FGFR3 inhibitor	244.287	348-45-8	C13H9FN2S	FC1=CC=C(NC2=NC3=C(S2)C=CC=C3)C=C1	8.77546	24.1884
Balsalazide	Immunology & Inflammation related	Immunology & Inflammation	Balsalazide (Colazal, Giazo), an aminosalicylate and oral prodrug, is enzymatically cleaved in the colon to produce the <b>anti-inflammatory</b> agent mesalazine. Balsalazide suppress colitis-associated carcinogenesis through modulation of <b>IL-6/STAT3</b> pathway.	357.32	80573-04-2	C17H15N3O6_x000D_	OC(=O)CCNC(=O)C1=CC=C(C=C1)N=NC2=CC(=C(O)C=C2)C(O)=O	38.2717	-3.3276
AZD8186	PI3K	PI3K/Akt/mTOR	AZD8186 is a potent and selective inhibitor of PI3Kβ and PI3Kδ with IC50 of 4 nM and 12 nM, respectively. Phase 1.	457.47	1627494-13-6	C24H25F2N3O4	CC(NC1=CC(=CC(=C1)F)F)C2=CC(=CC3=C2OC(=CC3=O)N4CCOCC4)C(=O)N(C)C	3.24706	35.3701
ligustroflavone	AMPK	PI3K/Akt/mTOR	Ligustroflavone, isolated from the leaves of Turpinia montana, shows high antioxidant capacity and is reported to be an <b>AMPK</b> activator.	724.66	260413-62-5	C33H40O18_x000D_	CC1OC(OCC2OC(OC3=CC(=C4C(=O)C=C(OC4=C3)C5=CC=C(O)C=C5)O)C(OC6OC(C)C(O)C(O)C6O)C(O)C2O)C(O)C(O)C1O	7.65686	1.65493
Vemurafenib (PLX4032, RG7204)	Raf	MAPK	Vemurafenib (PLX4032, RG7204) is a novel and potent inhibitor of B-RafV600E with IC50 of 31 nM in cell-free assay. 10-fold selective for B-RafV600E over wild-type B-Raf in enzymatic assays and the cellular selectivity can exceed 100-fold.	489.92	918504-65-1	C23H18ClF2N3O3S	CCC[S](=O)(=O)NC1=CC=C(F)C(=C1F)C(=O)C2=C[NH]C3=NC=C(C=C23)C4=CC=C(Cl)C=C4	30.3529	-2.12099
WAY-301524-A	CK2	others	CK2 inhibitors	299.348	474263-21-3	C15H13N3O2S	CC1=C(C)C2=C(S1)N=CN=C2NC3=CC=CC(=C3)C(O)=O	5.66072	30.462
T0070907	PPAR	DNA Damage	T0070907 is a potent and selective PPARγ inhibitor with IC50 of 1 nM in a cell-free assay, with a >800-fold selectivity over PPARα and PPARδ.	277.66	313516-66-4	C12H8ClN3O3	[O-][N+](=O)C1=CC=C(Cl)C(=C1)C(=O)NC2=CC=NC=C2	40.3652	26.3587
SBE 13 HCl	PLK	Cell Cycle	SBE 13 HCl is a potent and selective PLK1 inhibitor with IC50 of 200 pM, >4000-fold selectivity over Aurora A kinase, Plk2 and Plk3.	479.4	1052532-15-6	C24H28Cl2N2O4	Cl.COC1=CC=C(CCNCC2=CC=C(OCC3=CN=C(Cl)C=C3)C(=C2)OC)C=C1OC	-8.28683	2.15073
SB415286	GSK-3	PI3K/Akt/mTOR	SB415286 is a potent GSK3α inhibitor with IC50/Ki of 78 nM/31 nM with equally effective inhibition of GSK-3β.	359.72	264218-23-7	C16H10ClN3O5	OC1=C(Cl)C=C(NC2=C(C(=O)NC2=O)C3=C(C=CC=C3)[N+]([O-])=O)C=C1	34.1852	5.4906
JNJ-7706621	Aurora Kinase,CDK	Cell Cycle	JNJ-7706621 is pan-CDK inhibitor with the highest potency on CDK1/2 with IC50 of 9 nM/4 nM and showing >6-fold selectivity for CDK1/2 than CDK3/4/6 in cell-free assays. It also potently inhibits Aurora A/B and has no activity on Plk1 and Wee1.	394.36	443797-96-4	C15H12F2N6O3S	NC1=NC(=N[N]1C(=O)C2=C(F)C=CC=C2F)NC3=CC=C(C=C3)[S](N)(=O)=O	53.8945	40.3692
Cabozantinib (XL184, BMS-907351)	c-Met,VEGFR	Protein Tyrosine Kinase	Cabozantinib (XL184, BMS-907351) is a potent VEGFR2 inhibitor with IC50 of 0.035 nM and also inhibits c-Met, Ret, Kit, Flt-1/3/4, Tie2, and AXL with IC50 of 1.3 nM, 4 nM, 4.6 nM, 12 nM/11.3 nM/6 nM, 14.3 nM and 7 nM in cell-free assays, respectively.	501.51	849217-68-1	C28H24FN3O5	COC1=CC2=C(C=C1OC)C(=CC=N2)OC3=CC=C(NC(=O)C4(CC4)C(=O)NC5=CC=C(F)C=C5)C=C3	45.5271	-0.0310333
WAY-333878	pyruvate kinase	Metabolism	altering the lifespan of a eukaryotic organism; pyruvate kinase activators and inhibitors;	310.393	863448-25-3	C18H22N4O	CC1=CC(=C(C)C=C1)CN2C=NC3=C(C=N[N]3C(C)(C)C)C2=O	71.828	18.6712
GSK650394	Others	Others	GSK650394 is a serum- and glucocorticoid-regulated kinase-1 inhibitor with IC50 of 62 nM and 103 nM for SGK1 and SGK2, respectively.	382.45	890842-28-1	C25H22N2O2	OC(=O)C1=C(C=C(C=C1)C2=C[NH]C3=NC=C(C=C23)C4=CC=CC=C4)C5CCCC5	19.9607	11.1083
VE-822	ATM/ATR	PI3K/Akt/mTOR	VE-822 is an ATR inhibitor with IC50 of 19 nM in HT29 cells.	463.55	1232416-25-9	C24H25N5O3S	CNCC1=CC=C(C=C1)C2=NOC(=C2)C3=C(N)N=CC(=N3)C4=CC=C(C=C4)[S](=O)(=O)C(C)C	41.4088	38.2163
SB431542	TGF-beta/Smad	TGF-beta/Smad	SB431542 is a potent and selective inhibitor of ALK5 with IC50 of 94 nM in a cell-free assay, 100-fold more selective for ALK5 than p38 MAPK and other kinases.	384.39	301836-41-9	C22H16N4O3	NC(=O)C1=CC=C(C=C1)C2=NC(=C([NH]2)C3=NC=CC=C3)C4=CC5=C(OCO5)C=C4	47.1737	-4.78609
GNF-5	Bcr-Abl	Angiogenesis	GNF-5 is a selective and allosteric Bcr-Abl inhibitor with IC50 of 220 nM.	418.37	778277-15-9	C20H17F3N4O3	OCCNC(=O)C1=CC=CC(=C1)C2=CC(=NC=N2)NC3=CC=C(OC(F)(F)F)C=C3	1.92541	14.8942
LDC000067	CDK	Cell Cycle	LDC000067 is a highly selective CDK9 inhibitor with IC50 of 44 nM, 55/125/210/ >227/ >227-fold selectivity over CDK2/1/4/6/7.	370.43	1073485-20-7	C18H18N4O3S	COC1=CC=CC=C1C2=NC=NC(=C2)NC3=CC(=CC=C3)C[S](N)(=O)=O	57.1772	23.7428
GSK429286A	ROCK	Cell Cycle	GSK429286A is a selective inhibitor of ROCK1 and ROCK2 with IC50 of 14 nM and 63 nM, respectively.	432.37	864082-47-3	C21H16F4N4O2	CC1=C(C(CC(=O)N1)C2=CC=C(C=C2)C(F)(F)F)C(=O)NC3=C(F)C=C4[NH]N=CC4=C3	50.2579	32.1988
WAY-626309	c-Jun N-terminal kinase	MAPK	inhibitors of the c-Jun N-terminal kinase	336.408	756849-36-2	C19H16N2O2S	NC(=O)C1=C(NC(=O)CC2=CC=C(C=C2)C3=CC=CC=C3)SC=C1	16.3582	13.1613
Ki8751	c-Kit,PDGFR,VEGFR	Protein Tyrosine Kinase	Ki8751 is a potent and selective inhibitor of VEGFR2 with IC50 of 0.9 nM, >40-fold selective for VEGFR2 than c-Kit, PDGFRα and FGFR-2, little activity to EGFR, HGFR and InsR.	469.41	228559-41-9	C24H18F3N3O4	COC1=CC2=NC=CC(=C2C=C1OC)OC3=CC=C(NC(=O)NC4=CC=C(F)C=C4F)C(=C3)F	40.2042	22.6909
Norcantharidin	EGFR,c-Met	Protein Tyrosine Kinase	Norcantharidin is a synthetic anticancer compound which is a dual inhibitor for c-Met and EGFR in human colon cancers.	168.15	29745-04-8	C8H8O4	O=C1OC(=O)C2C3CCC(O3)C12	22.2055	5.50674
Metformin HCl	Autophagy	Autophagy	Metformin HCl decreases hyperglycemia in hepatocytes primarily by suppressing glucose production by the liver (hepatic gluconeogenesis).	165.62	1115-70-4	C4H12ClN5	Cl.CN(C)C(=N)NC(N)=N	13.5246	11.6044
AZD1080	GSK-3	PI3K/Akt/mTOR	AZD1080 is a selective, orally active, brain permeable GSK3 inhibitor, inhibits human GSK3α and GSK3β with Ki of 6.9 nM and 31 nM, respectively, shows >14-fold selectivity against CDK2, CDK5, CDK1 and Erk2.	334.37	612487-72-6	C19H18N4O2	OC1=C(C2=CC=C(CN3CCOCC3)C=N2)C4=CC(=CC=C4[NH]1)C#N	11.432	15.9758
SU9516	CDK	Cell Cycle	SU 9516 is a 3-substituted indolinone CDK inhibitor with IC50 of 22 nM, 40 nM, and 200 nM for CDK2, CDK1, and CDK4, respectively.	241.25	377090-84-1	C13H11N3O2	COC1=CC=C2NC(=O)C(=C\C3=CN=C[NH]3)/C2=C1	-17.8728	27.1971
HO-3867	STAT	JAK/STAT	HO-3867, an analog of curcumin, is a selective STAT3 inhibitor that inhibits its phosphorylation, transcription, and DNA binding without affecting the expression of other active STATs.	464.55	1172133-28-6	C28H30F2N2O2	CC1(C)C=C(CN2C\C(=C/C3=CC=C(F)C=C3)C(=O)C(/C2)=C/C4=CC=C(F)C=C4)C(C)(C)N1O	38.9015	10.5617
WAY-354890	EGFR	Protein Tyrosine Kinase , Angiogenesis , JAK/STAT	EGFR kinase inhibitors	313.392	852407-49-9	C17H16FN3S	FC1=CC=C(CNC2=NC=NC3=C2C4=C(CCCC4)S3)C=C1	69.0419	20.6178
GDC-0879	Raf	MAPK	GDC-0879 is a novel, potent, and selective B-Raf inhibitor with IC50 of 0.13 nM in A375 and Colo205 cells with activity against c-Raf as well no inhibition known to other protein kinases.	334.37	905281-76-7	C19H18N4O2	OCC[N]1C=C(C2=CC=C\3C(=C2)CCC3=N\O)C(=N1)C4=CC=NC=C4	20.7679	16.1696
WZ3146	EGFR	Protein Tyrosine Kinase	WZ3146 is a mutant-selective irreversible inhibitor of EGFR(L858R) and EGFR(E746_A750) with IC50 of 2 nM and 2 nM does not inhibit ERBB2 phosphorylation (T798I).	464.95	1214265-56-1	C24H25ClN6O2	CN1CCN(CC1)C2=CC=C(NC3=NC=C(Cl)C(=N3)OC4=CC(=CC=C4)NC(=O)C=C)C=C2	25.2477	-4.05143
AZD1208	Pim	JAK/STAT	AZD1208 is a potent, and orally available Pim kinase inhibitor with IC50 of 0.4 nM, 5 nM, and 1.9 nM for Pim1, Pim2, and Pim3 in cell-free assays, respectively. Phase 1.	379.48	1204144-28-4	C21H21N3O2S	NC1CCCN(C1)C2=C(C=CC=C2C3=CC=CC=C3)\C=C\4SC(=O)NC4=O	20.6757	-0.0219917
Sotrastaurin	PKC	TGF-beta/Smad	Sotrastaurin is a potent and selective pan-PKC inhibitor, mostly for PKCθ with Ki of 0.22 nM in a cell-free assay inactive to PKCζ. Phase 2.	438.48	425637-18-9	C25H22N6O2	CN1CCN(CC1)C2=NC(=C3C=CC=CC3=N2)C4=C(C(=O)NC4=O)C5=C[NH]C6=C5C=CC=C6	46.5565	11.5046
GNF-5837	Trk receptor	Protein Tyrosine Kinase	GNF-5837 is a selective, and orally bioavailable pan-TRK inhibitor for TrkA, and TrkB with IC50 of 8 nM, and 12 nM, respectively.	535.49	1033769-28-6	C28H21F4N5O2	CC1=CC=C(NC(=O)NC2=CC(=CC=C2F)C(F)(F)F)C=C1NC3=CC=C\4C(=C3)NC(=O)C4=C\C5=CC=C[NH]5	15.6833	11.0247
WAY-350732	c-Jun N-terminal kinase	others	dual inhibitors of the c-Jun N-terminal kinase	339.208	438602-71-2	C13H11BrN2O2S	NC(=O)C1=C(NC(=O)CC2=CC=C(Br)C=C2)SC=C1	32.5888	24.1307
AG 555	EGFR	Protein Tyrosine Kinase	AG-555 is an inhibitor of tyrosine kinase , interacts directly with topoisomerase I, thus preventing DNA relaxation. It inhibits EGFR with an IC50 of 0.7 μM.	322.36	133550-34-2	C19H18N2O3_x000D_	OC1=C(O)C=C(C=C1)\C=C(C#N)\C(=O)NCCCC2=CC=CC=C2	29.0864	42.163
TEPP-46 (ML265, CID-44246499, NCGC00186528)	PKM	Metabolism	ML265 is a potent activator of <b>PKM2</b> in both biochemical (AC50 = 92 nM) and cell-based assays with high selectivity over PKM1, PKR and PKL.	372.46	1221186-53-3	C17H16N4O2S2	C[N]1C2=C(SC(=C2)[S](C)=O)C3=C1C(=O)N(CC4=CC=CC(=C4)N)N=C3	13.7946	34.6275
ex229 (compound 991)	AMPK	PI3K/Akt/mTOR	EX229 (compound 991) is a potent <b>AMPK</b> activator that is 5-10-fold more potent than A769662 in activating AMPK.	431.87	1219739-36-2	C24H1ClN3O3	C[N]1C=CC2=C1C=CC(=C2)C3=C(Cl)C=C4[NH]C(=NC4=C3)OC5=CC(=C(C)C=C5)C(O)=O	30.7225	16.3888
WAY-311753-A	tyrosine kinase	tyrosine kinase	tyrosine kinase inhibitors	297.375	345615-74-9	C16H15N3OS	OC1=CC=C(NC2=NC=NC3=C2C4=C(CCCC4)S3)C=C1	2.03021	10.4372
Mesalamine	IκB/IKK,Immunology & Inflammation related	NF-κB	Mesalamine is a specific inhibitor of TNFα-induced IKK activity, used to treat inflammatory bowel disease.	153.14	89-57-6	C7H7NO3	NC1=CC=C(O)C(=C1)C(O)=O	25.8599	20.4894
Miransertib (ARQ-092)	Akt	PI3K/Akt/mTOR	Miransertib (ARQ-092) is a potent, selective and orally bioavailable allosteric inhibitor of Akt with IC50s of 2.7 nM, 14 nM and 8.1 nM for Akt1, Akt2, Akt3, respectively.	432.52	1313881-70-7	C27H24N6_x000D_	NC1=C(C=CC=N1)C2=NC3=C(N=C(C=C3)C4=CC=CC=C4)[N]2C5=CC=C(C=C5)C6(N)CCC6	22.6747	10.1389
Mavacamten (MYK-461)	Others	Others	Mavacamten (MYK-461) is a small-molecule modulator of <b>cardiac myosin</b> that targets the underlying sarcomere hypercontractility of hypertrophic cardiomyopathy (HCM), one of the most prevalent heritable cardiovascular disorders.	273.33	1642288-47-8	C15H19N3O2_x000D_	CC(C)N1C(=O)NC(=CC1=O)NC(C)C2=CC=CC=C2	-0.716943	24.6181
SP600125	JNK	MAPK	SP600125 is a broad-spectrum JNK inhibitor for JNK1, JNK2 and JNK3 with IC50 of 40 nM, 40 nM and 90 nM in cell-free assays, respectively 10-fold greater selectivity against MKK4, 25-fold greater selectivity against MKK3, MKK6, PKB, and PKCα, and 100-fold selectivity against ERK2, p38, Chk1, EGFR etc.	220.23	129-56-6	C14H8N2O	O=C1C2=C(C=CC=C2)C3=N[NH]C4=CC=CC1=C34	44.8435	12.0268
LJI308	S6 Kinase	PI3K/Akt/mTOR	LJI308 is a potent, and pan-RSK (p90 ribosomal S6 kinase) inhibitor with IC50 of 6 nM, 4 nM, and 13 nM for RSK1, RSK2, and RSK3, respectively.	368.38	1627709-94-7	C21H18F2N2O2	OC1=C(F)C=C(C=C1F)C2=C(C=CN=C2)C3=CC=C(C=C3)N4CCOCC4	-1.53121	13.7053
EAI045	EGFR	Protein Tyrosine Kinase	EAI045 is an allosteric inhibitor that targets selected drug-resistant EGFR mutants but spares the wild-type receptor.	383.4	1942114-09-1	C19H14FN3O3S	OC1=CC=C(F)C=C1C(N2CC3=C(C=CC=C3)C2=O)C(=O)NC4=NC=CS4	10.3665	17.3563
UNC2025	FLT3	Protein Tyrosine Kinase	UNC2025 is a potent and orally active dual inhibitor of FLT3 and MER with IC50 of 0.35 nM and 0.46 nM, respectively. UNC2025 also inhibits AXL, TRKA, TRKC, QIK, TYRO3, SLK, NuaK1, KIT and Met with IC50 of 1.65 nM, 1.67 nM, 4.38 nM, 5.75 nM, 5.83 nM, 6.14 nM, 7.97 nM, 8.18 nM and 364 nM, respectively.	476.66	1429881-91-3	C28H40N6O_x000D_	CCCCNC1=NC=C2C(=N1)[N](C=C2C3=CC=C(CN4CCN(C)CC4)C=C3)C5CCC(O)CC5	59.2151	15.6736
WAY-641966	TGF-β,p38-α	TGF-beta/Smad & Stem Cells & Wnt ,MAPK	anti-prion agent; preventive and therapeutic effect for diabetes and obesity; TGF-β inhibitors; TGF-β and/or p38-α kinase inhibitors; TGF-β and/or p38-α kinase inhibitors;	312.368	259870-32-1	C20H16N4	C(NC1=C2C=CC=CC2=NC(=N1)C3=CC=CC=C3)C4=CC=NC=C4	19.342	24.9821
TAS-120	FGFR	Protein Tyrosine Kinase	TAS-120 is an irreversible <b>fibroblast growth factor receptor (FGFR)</b> inhibitor which inhibits all 4 subtypes of FGFR with enzyme IC50 values of 3.9 nM, 1.3 nM, 1.6 nM and 8.3 nM for FGFR1, FGFR2, FGFR3 and FGFR4 respectively.	418.45	1448169-71-8	C22H22N6O3_x000D_	COC1=CC(=CC(=C1)C#CC2=N[N](C3CCN(C3)C(=O)C=C)C4=NC=NC(=C24)N)OC	15.2116	20.316
WAY-333908	others	others	protein kinase inhibitors	332.316	689269-24-7	C17H12N6O2	NC(=O)C1=NC(=NC2=C1NC(=O)N2C3=CC=CC=C3)C4=CC=CN=C4	-4.64098	43.0545
CP-724714	EGFR,HER2	Protein Tyrosine Kinase	CP-724714 is a potent, selective inhibitor of HER2/ErbB2 with IC50 of 10 nM, >640-fold selectivity against EGFR, InsR, IRG-1R, PDGFR, VEGFR2, Abl, Src, c-Met etc in cell-free assays. Phase 2.	469.53	537705-08-1	C27H27N5O3	COCC(=O)NC/C=C/C1=CC=C2N=CN=C(NC3=CC=C(OC4=CC=C(C)N=C4)C(=C3)C)C2=C1	70.9908	9.35495
HG-14-10-04	ALK	Angiogenesis	HG-14-10-04 is an inhibitor of ALK .	532.08	1356962-34-9	C29H34ClN7O_x000D_	COC1=C(NC2=NC=C(Cl)C(=N2)C3=C[NH]C4=CC=CC=C34)C=CC(=C1)N5CCC(CC5)N6CCN(C)CC6	43.1818	49.0872
GSK1904529A	IGF-1R	Protein Tyrosine Kinase	GSK1904529A is a selective inhibitor of IGF-1R and IR with IC50 of 27 nM and 25 nM in cell-free assays, >100-fold more selective for IGF-1R/InsR than Akt1/2, Aurora A/B,B-Raf, CDK2, EGFR etc.	851.96	1089283-49-7	C44H47F2N9O5S	CCC1=CC(=C(OC)C=C1N2CCC(CC2)N3CCN(CC3)[S](C)(=O)=O)NC4=NC(=CC=N4)C5=C(N=C6C=CC=C[N]56)C7=CC(=C(OC)C=C7)C(=O)NC8=C(F)C=CC=C8F	37.5388	4.89629
WAY-313201	GSK-3b	PI3K/Akt/mTOR,Stem Cells,Wnt	selective GSK-3b inhibitors	264.3	571904-77-3	C12H12N2O3S	COC1=C(OC)C=C(C=C1)\C=C/2SC(=N)NC2=O	22.0484	16.9808
WAY-660114	kinase	Others	protein kinase inhibitor;	344.39	871317-00-9	C14H9FN6S2	C[N]1N=NN=C1SC2=C3SC(=CC3=NC=N2)C4=CC=C(F)C=C4	1.46066	14.6916
WAY-277364	Akt	PI3K/Akt/mTOR	Allosteric Akt Inhibitors	348.374	771498-80-7	C20H17FN4O	OCCNC1=NC=NC2=C1C(=C[N]2C3=CC=C(F)C=C3)C4=CC=CC=C4	12.238	3.0406
RBC8	Others	Others	RBC8 is a selective inhibitor of the GTPases RalA and RalB by inhibiting the binding of Ral to its effector RALBP1, no inhibition on the GTPases Ras and RhoA.	424.45	361185-42-4	C25H20N4O3	COC1=CC(=C(OC)C=C1)C2C(=C(N)OC3=C2C(=N[NH]3)C4=CC=C5C=CC=CC5=C4)C#N	17.2346	2.04263
WAY-650886	Casein kinase 1δ	Metabolism	Casein kinase 1δ inhibitor; Casein kinase 1δ inhibitor;	332.356	848066-61-5	C19H16N4O2	CC1=C(C(=O)NC2=C(N=C3C=CC=C[N]23)C4=CC=CC=C4)C(=NO1)C	-3.63497	19.7204
ME-401	PI3K	PI3K/Akt/mTOR	ME-401 (PWT-143, P110δ-IN-1) is an oral, potent and selective inhibitor of <b>Phosphatidylinositol 3-Kinase (PI3K) P110δ</b> with IC50 of 0.6 nM in cellular assay.	604.77	1595129-71-7	C31H40N8O3S_x000D_	CN1CCC(CC1)C2=CC=CC=C2CC(C)(C)NC3=NC(=NC(=N3)N4CCOCC4)[N]5C6=CC=CC=C6N=C5[S](C)(=O)=O	10.1666	-3.74662
Isoprenaline HCl	Adrenergic Receptor	Neuronal Signaling	Isoprenaline is a non-selective beta-adrenergic receptor agonist, used for the treatment of bradycardia and heart block.	247.72	51-30-9	C11H18ClNO3	Cl.CC(C)NCC(O)C1=CC=C(O)C(=C1)O	18.0511	10.0485
WH-4-023	Src	Angiogenesis	WH-4-023 is a potent and orally active Lck/Src inhibitor with IC50s of 2 nM and 6 nM in cell-free assays, respectively. Exhibits >300-fold selectivity against p38α and KDR. Also potently inhibits SIK (IC50 values are 10, 22 and 60 nM for SIK 1, 2 and 3 respectively) and displays selectivity over a range of closely related kinases.	568.67	837422-57-8	C32H36N6O4	COC1=CC=C(N(C(=O)OC2=C(C)C=CC=C2C)C3=CC=NC(=N3)NC4=CC=C(C=C4)N5CCN(C)CC5)C(=C1)OC	17.7693	18.6831
WAY-624687	GSK3	PI3K/Akt/mTOR,Stem Cells , Wnt	GSK3 inhibitor; altering the lifespan of a eukaryotic organism;	299.374	753473-65-3	C13H9N5S2	C1SC2=NN=C([N]2N=C1C3=CC=CS3)C4=CC=NC=C4	9.3671	25.5891
WAY-327480	ROS	Protein Tyrosine Kinase	inhibition of ROS tyrosine kinase	437.535	687576-28-9	C22H19N3O3S2	N[S](=O)(=O)C1=CC=C(CCNC(=O)C2=CC(=NC3=CC=CC=C23)C4=CC=CS4)C=C1	-4.70396	15.95
STF-083010	Others	Others	STF-083010 is a specific IRE1α endonuclease inhibitor without affecting its kinase activity.	317.38	307543-71-1	C15H11NO3S2	OC1=CC=C2C=CC=CC2=C1C=N[S](=O)(=O)C3=CC=CS3	-2.80651	30.3337
GSK2578215A	LRRK2	Autophagy	GSK2578215A is a potent and selective LRRK2 kinase inhibitor with IC50 of 8.9 nM and 10.9 nM for LRRK2 (G2019S) and LRRK2 (WT), respectively.	399.42	1285515-21-0	C24H18FN3O2	FC1=NC=CC(=C1)C2=CC(=C(OCC3=CC=CC=C3)C=C2)C(=O)NC4=CC=CN=C4	6.54852	18.2171
SU6656	Src	Angiogenesis	SU 6656 is a selective Src family kinase inhibitor with IC50 of 280 nM, 20 nM, 130 nM, and 170 nM for Src, Yes, Lyn, and Fyn, respectively.	371.45	330161-87-0	C19H21N3O3S	CN(C)[S](=O)(=O)C1=CC=C2NC(=O)C(=C\C3=CC4=C(CCCC4)[NH]3)/C2=C1	-4.83941	28.9253
DGY-06-116	Src	Angiogenesis & Protein Tyrosine Kinase	DGY-06-116 is an irreversible covalent and selective inhibitor of <b>Src</b> with IC50 of 2.6 nM.	597.11	Unknown	C32H33ClN8O2_x000D_	CN1CCN(CC1)C2=CC=C(NC3=NC(=C(C=N3)C(=O)NC4=C(Cl)C=CC=C4C)NC5=CC=CC=C5NC(=O)C=C)C=C2	43.8574	2.79613
WAY-603392	AKT(PKB) phosphorylation,ion channel	others	AKT(PKB) phosphorylation inhibitors; ion channel modulators; ion channel modulators; ion channel modulators;	256.321	329906-01-6	C11H16N2O3S	CCOC(=O)CC1=CSC(=N1)N2CCOCC2	-11.6953	10.9304
WAY-632613	p38	MAPK	p38 MAP Kinase inhibitor	302.348	731816-85-6	C15H14N2O3S	COC1=C(OC)C=C(C=C1)C2=CSC3=C2C(=O)NC(=N3)C	22.2649	-26.0997
WZ8040	EGFR	Protein Tyrosine Kinase	WZ8040 is a novel mutant-selective irreversible EGFRT790M inhibitor, does not inhibit ERBB2 phosphorylation (T798I).	481.01	1214265-57-2	C24H25ClN6OS	CN1CCN(CC1)C2=CC=C(NC3=NC=C(Cl)C(=N3)SC4=CC(=CC=C4)NC(=O)C=C)C=C2	22.6316	12.4726
8-Bromo-cAMP	PKA	Others	8-bromo-cAMP is a cell permeable analog of cAMP that activates cyclic-AMP-dependent protein kinase with a Ka value of 0.05 μM and a PKA activator.	430.08	76939-46-3	C10H10BrN5NaO6P	NC1=NC=NC2=C1N=C(Br)[N]2C3OC4CO[P](=O)(O[Na])OC4C3O	-6.90911	16.0416
Ethyl gallate	NF-κB	PI3k-Akt	Ethyl gallate obviously decreases cell proliferation in MDA-MB-231 and MCF-7 cells in a dose- and time-dependent manner, exhibits cytotoxicity in a dose-dependent manner.	198.17	831-61-8	C9H10O5	CCOC(=O)C1=CC(=C(O)C(=C1)O)O	15.1551	-2.4019
Apilimod mesylate	Interleukins	Immunology & Inflammation	Apilimod mesylate (STA-5326 mesylate) is a potent and orally-available inhibitor of the cytokines interleukin-12 (IL-12) and interleukin-23 (IL-23) with the potential to treat certain autoimmune and inflammatory diseases. Apilimod mesylate (STA-5326 mesylate) inhibits IL-12 with IC50 of 1 nM, 1 nM and 2 nM, in IFN-γ/SAC-stimulated human PBMCs, human monocytes and mouse PBMCs, respectively. Apilim…	610.7	870087-36-8	C25H34N6O8S2_x000D_	CC1=CC(=CC=C1)/C=N/NC2=CC(=NC(=N2)OCCC3=CC=CC=N3)N4CCOCC4.C[S](O)(=O)=O.C[S](O)(=O)=O	8.94128	-9.26597
GI-560708	BCR-ABL	Angiogenesis，Cytoskeletal Signaling ， TGF-beta/Smad	inhibitors of BCR-ABL tyrosine kinase	346.383	2362-25-6	C20H18N4O2	NC1=CC=C(C=C1)C(=O)NC2=CC=CC(=C2)NC(=O)C3=CC=C(N)C=C3	29.9982	37.9241
STAT5-IN-1	STAT	JAK/STAT	STAT5-IN-1 is a potent and selective <b>STAT5</b> inhibitor with IC50 of 47 μM for STAT5β isoform.	293.28	285986-31-4	C16H11N3O3_x000D_	O=C(N\N=C\C1=COC2=C(C=CC=C2)C1=O)C3=CC=CN=C3	8.14531	6.81732
WAY-322545	GSK-3α/β	PI3K/Akt/mTOR,Stem Cells,Wnt	altering the lifespan of a eukaryotic organism; GSK-3α/β inhibitor;	334.797	451449-70-0	C17H19ClN2O3	COC1=CC=C(C=C1)N2C(=O)C(=C(N3CCCC(C)C3)C2=O)Cl	8.58769	28.2667
PF-6260933	Serine/threonin kina	Protein Tyrosine Kinase	PF-6260933 is a potent inhibitor of MAP4K4 with an IC50 of 3.7 nM, possessing excellent kinome selectivity.	296.75	1811510-56-1	C16H13ClN4	NC1=CC=C(C=N1)C2=CN=C(N)C(=C2)C3=CC=C(Cl)C=C3	42.1466	70.6903
K-Ras(G12C) inhibitor 6	Rho	Cell Cycle	K-Ras(G12C) inhibitor 6 is an allosteric, and selective inhibitor of oncogenic K-Ras(G12C).	405.34	2060530-16-5	C17H22Cl2N2O3S	SCCCC(=O)NC1CCN(CC1)C(=O)COC2=CC=C(Cl)C=C2Cl	2.72058	18.5272
BioE-1115	Serine/threonin kinase	Metabolism	BioE-1115 is a highly selective and potent dual inhibitor of <b>PAS kinase (PASK)</b> and <b>casein kinase 2α (CK2α)</b> with IC50 of ~4 nM and ~10 μM, respectively.	339.36	1268863-35-9	C19H18FN3O2_x000D_	CC(C)N(C)C1=NC2=CC(=CC=C2N=C1C3=CC=C(F)C=C3)C(O)=O	13.5127	-10.2949
TG100-115	PI3K	PI3K/Akt/mTOR	TG100-115 is a PI3Kγ/δ inhibitor with IC50 of 83 nM/235 nM, with little effect on PI3Kα/β. Phase 1/2.	346.34	677297-51-7	C18H14N6O2	NC1=NC2=NC(=C(N=C2C(=N1)N)C3=CC(=CC=C3)O)C4=CC=CC(=C4)O	29.334	15.2992
SMI-4a	Pim	JAK/STAT	SMI-4a is a potent inhibitor of?Pim1?with?IC50?of 17 nM, modestly potent to Pim-2, does not significantly inhibit any other serine/threonine- or tyrosine-kinases.	273.23	438190-29-5	C11H6F3NO2S	FC(F)(F)C1=CC(=CC=C1)\C=C2/SC(=O)NC2=O	85.0468	12.4623
LTURM34	DNA-PK	DNA Damage	LTURM34 is a specific DNA-PK inhibitor, 170-fold more selective for DNA-PK activity compared to PI3K activity, with IC50 value of 0.034 μM.	414.48	1879887-96-3	C24H18N2O3S	O=C1N=C(OC2=C1C=CC=C2C3=C4SC5=C(C=CC=C5)C4=CC=C3)N6CCOCC6	18.9169	-7.78294
Nilotinib hydrochloride	Bcr-Abl	Angiogenesis	Nilotinib hydrochloride is the hydrochloride salt form of nilotinib, an orally bioavailable Bcr-Abl tyrosine kinase inhibitor with antineoplastic activity.	565.977	923288-95-3	C28H23ClF3N7O	Cl.CC1=C[N](C=N1)C2=CC(=CC(=C2)C(F)(F)F)NC(=O)C3=CC=C(C)C(=C3)NC4=NC=CC(=N4)C5=CC=CN=C5	32.6768	14.4819
URMC-099	LRRK2	Autophagy	URMC-099 is an orally bioavailable, brain penetrant mixed lineage kinase (MLK) inhibitor with IC50 of 19 nM, 42 nM, 14 nM, and 150 nM, for MLK1, MLK2, MLK3, and DLK, respectively, and also inhibits LRRK2 activity with IC50 of 11 nM.	421.54	1229582-33-5	C27H27N5	CN1CCN(CC1)CC2=CC=C(C=C2)C3=CC4=C([NH]C=C4C5=CC=C6[NH]C=CC6=C5)N=C3	64.9032	21.5348
WAY-333434	kinase	Others	inhibitor of protein kinases	385.458	721964-45-0	C19H20FN5OS	CC1CCN(CC1)C(=O)CSC2=N[N]3C(=NN=C3C4=CC=C(F)C=C4)C=C2	-8.65666	27.3163
HI-TOPK-032	TOPK	MAPK	HI-TOPK-032 is a potent and specific inhibitor of TOPK. HI-TOPK-032 also reduces ERK-RSK phosphorylation, regulates of the abundance of p53, cleaved caspase-7, and cleaved PARP, and induces apoptosis in cancer cells.	369.4	487020-03-1	C20H11N5OS_x000D_	O=C(NC1=CC2=C(C#N)C3=C(N=C4C=CC=CC4=N3)[N]2C=C1)C5=CC=CS5	14.0064	16.6572
Isoguanosine	Others	cancer	Crotonoside is one compound of an antitumor and immunity-regulating pharmaceutical composition of traditional Chinese medicine. Crotonoside inhibits the growth of S-180 and Ehrlich solid tumor in mice at the optimal doses of 96 mg/kg/day x 12 and 48 mg/kg/day x 12, with 1-T/C values of 65% and 60%, respectively.	283.241	1818-71-9	C10H13N5O5	NC1=NC(=O)NC2=C1N=C[N]2C3OC(CO)C(O)C3O	4.84707	2.9872
Crenolanib (CP-868596)	PDGFR	Protein Tyrosine Kinase	Crenolanib (CP-868596) is a potent and selective inhibitor of PDGFRα/β with Kd of 2.1 nM/3.2 nM in CHO cells, also potently inhibits FLT3, sensitive to D842V mutation not V561D mutation, >100-fold more selective for PDGFR than c-Kit, VEGFR-2, TIE-2, FGFR-2, EGFR, erbB2, and Src.	443.54	670220-88-9	C26H29N5O2	CC1(COC1)COC2=CC3=C(C=C2)[N](C=N3)C4=NC5=C(C=CC=C5C=C4)N6CCC(N)CC6	33.2956	32.6211
WAY-638796	tyrosine kinase	Protein Tyrosine Kinase	tyrosine kinase inhibitor; inhibiting neoplastic cell growth; phosphodiesterase V inhibitor;	287.767	796067-64-6	C14H10ClN3S	ClC1=C2C3=C(CCC3)SC2=NC(=N1)C4=CN=CC=C4	-2.968	14.6646
WAY-322454	GRK6	Immunology & Inflammation related	inhibitors of GRK6	312.366	1008244-02-7	C17H20N4O2	CCCCC[N]1C(=C(C(=O)OC)C2=NC3=CC=CC=C3N=C12)N	13.2233	3.25208
SC-514	IκB/IKK	NF-κB	SC-514 is an orally active, ATP-competitive IKK-2 inhibitor with IC50 of 3-12 μM, blocks NF-κB-dependent gene expression, does not inhibit other IKK isoforms or other serine-threonine and tyrosine kinases.	224.3	354812-17-2	C9H8N2OS2	NC(=O)C1=C(N)C=C(S1)C2=CSC=C2	25.3092	4.8655
WAY-321961	protein kinase D	Apoptosis	Protein kinase d inhibitors; protein kinase D inhibitors; PKD inhibitors;	217.221	370586-05-3	C12H11NO3	OC1=CC2=C(OC(=O)C3=C2CCCN3)C=C1	3.51635	25.466
WAY-643632-A	SRC kinase,TTX-S channel	Angiogenesis,Transmembrane Transporters	inhibiting collagen production; SRC kinase inhibition; TTX-S channel blockers;	206.241	500356-88-7	C11H14N2O2	OC(=O)C1=NC=CC(=C1)N2CCCCC2	-5.8593	11.3105
WAY-297152	MtSk	others	MtSk inhibitors	314.201	397878-17-0	C11H12BrN3OS	COC1=C(Br)C=C(CC2=NN=C(S)[N]2C)C=C1	10.1899	8.3401
WAY-311747	MtSk	others	MtSk inhibitors	287.357	381671-40-5	C16H21N3O2	CC(O)C1=NC2=CC=CC=C2[N]1CC(=O)N3CCCCC3	16.5701	15.5353
IKK-16 (IKK Inhibitor VII)	IκB/IKK	NF-κB	IKK-16 (IKK Inhibitor VII) is a selective IκB kinase (IKK) inhibitor for IKK-2, IKK complex and IKK-1 with IC50 of 40 nM, 70 nM and 200 nM in cell-free assays, respectively.	483.63	873225-46-8	C28H29N5OS	O=C(N1CCC(CC1)N2CCCC2)C3=CC=C(NC4=NC=CC(=N4)C5=CC6=CC=CC=C6S5)C=C3	10.7278	-4.595
WAY-621555	Casein kinase 1δ	Metabolism	Casein kinase 1δ inhibitor	355.436	956753-89-2	C22H21N5	C1CC[N]2C(=NN=C2C3=CC(=N[N]3C4=CC=CC=C4)C5=CC=CC=C5)CC1	-3.57543	0.273441
Longdaysin	Casein Kinase	Metabolism	Longdaysin is a Casein Kinase inhibitor with IC50 values of 8.8 μM, 5.6 μM, 52 μM and 29 μM for CKIδ, CKIα, ERK2 and CDK7.	335.33	1353867-91-0	C16H16F3N5_x000D_	CC(C)[N]1C=NC2=C1N=CN=C2NCC3=CC=CC(=C3)C(F)(F)F	48.5182	15.7253
WAY-301527	Casein Kinase	Metabolism	Casein kinase 1d inhibitors	313.374	315682-22-5	C16H15N3O2S	CC1=C(C)C2=C(S1)N=CN=C2NC3=CC4=C(OCCO4)C=C3	16.1701	15.6763
PHA-665752	c-Met	Protein Tyrosine Kinase	PHA-665752 is a potent, selective and ATP-competitive c-Met inhibitor with IC50 of 9 nM in cell-free assays, >50-fold selectivity for c-Met than RTKs or STKs.	641.61	477575-56-7	C32H34Cl2N4O4S	CC1=C(C(=C([NH]1)/C=C/2C(=O)NC3=C2C=C(C=C3)[S](=O)(=O)CC4=C(Cl)C=CC=C4Cl)C)C(=O)N5CCCC5CN6CCCC6	33.3662	1.58776
SB590885	Raf	MAPK	SB590885 is a potent B-Raf inhibitor with Ki of 0.16 nM in a cell-free assay, 11-fold greater selectivity for B-Raf over c-Raf, no inhibition to other human kinases.	453.54	405554-55-4	C27H27N5O2	CN(C)CCOC1=CC=C(C=C1)C2=NC(=C([NH]2)C3=CC=C\4C(=C3)CCC4=N\O)C5=CC=NC=C5	39.4274	19.9671
GSK'547	TNF-alpha	Apoptosis	GSK'547 is a highly selective and potent inhibitor of <b>RIP1</b> exhibiting a 400-fold improvement in mouse pharmacokinetic oral exposure compared with GSK'963	396.39	2226735-55-1	C20H18F2N6O_x000D_	FC1=CC(=CC(=C1)F)C2CC=NN2C(=O)C3CCN(CC3)C4=NC=NC(=C4)C#N	23.2952	6.95469
MHY1485	mTOR,Autophagy	PI3K/Akt/mTOR	MHY1485 is a potent, and cell-permeable mTOR activator, and also potently inhibits autophagy.	387.39	326914-06-1	C17H21N7O4	[O-][N+](=O)C1=CC=C(NC2=NC(=NC(=N2)N3CCOCC3)N4CCOCC4)C=C1	-1.97223	17.1243
VO-Ohpic trihydrate	PTEN	Others	VO-Ohpic is a potent inhibitor of PTEN (phosphatase and tensin homolog) with IC50 of 35 nM.	415.2	476310-60-8	C12H15N2O11V	O.O.O.OC1=CC=CN|2=C1C(=O)O[VH]3|2(O)(=O)OC(=O)C4=NC=CC=C4O3	38.8476	10.4557
CHIR-98014	GSK-3	PI3K/Akt/mTOR	CHIR-98014 is a potent GSK-3α/β inhibitor with IC50 of 0.65 nM/0.58 nM in cell-free assays, with the ability to distinguish GSK-3 from its closest homologs Cdc2 and ERK2.	486.31	252935-94-7	C20H17Cl2N9O2	NC1=NC(=CC=C1[N+]([O-])=O)NCCNC2=NC=C([N]3C=CN=C3)C(=N2)C4=CC=C(Cl)C=C4Cl	11.718	6.14754
2-Methoxy-1,4-naphthoquinone	PKC	Cytoskeletal Signaling	2-Methoxy-1,4-naphthoquinone, isolated from the leaves of Impatiens glandulifera, specifically suppressed the expression of PKC βI, δ, and ζ in a concentration-dependent manner in Raji cells.	188.18	2348-82-5	C11H8O3	COC1=CC(=O)C2=C(C=CC=C2)C1=O	57.3617	3.9444
Tracheloside	phosphatase,ERK	MAPK	Tracheloside is a lignan glycoside isolated from seeds of Carthamus tinctorius with anti-estrogenic effects. Tracheloside significantly decreases the activity of alkaline phosphatase (AP) (an estrogen-inducible marker enzyme) with IC50 of 0.31 μg/ml. Tracheloside promotes keratinocyte proliferation through ERK1/2 stimulation.	550.55	33464-71-0	C27H34O12_x000D_	COC1=CC=C(CC2COC(=O)C2(O)CC3=CC(=C(OC4OC(CO)C(O)C(O)C4O)C=C3)OC)C=C1OC	9.54855	17.4377
WAY-226683	Rho	Cell Cycle	Rho kinase inhibitors	258.273	309736-94-5	C14H14N2O3	COC1=CC(=C(C=C1)C(=O)NC2=CC=NC=C2)OC	-1.52068	2.93488
WAY-388796	PDE5,PARP-1,PDE4,LIMK1,c-Met	others	PDE5 inhibitors; PARP-1 inhibitory activity; anticancer agents; inhibitors of PDE4; cMet inhibitors; LIMK1 inhibitors; LIMK1 inhibitors; c-Met kinase inhibitors;	238.736	40106-58-9	C11H11ClN2S	ClC1=NC=NC2=C1C3=C(CCCCC3)S2	27.3466	4.60944
WAY-380496	DAPK	others	novel DAPK inhibitors	310.304	304000-05-3	C17H14N2O4	COC1=C(OC)C=C(C=C1)C2=N/C(=C/C3=CC=CN=C3)C(=O)O2	7.50881	9.58378
Nordihydroguaiaretic acid (NDGA)	Lipoxygenase	Metabolism	Nordihydroguaiaretic acid (NDGA) is a phenolic antioxidant found in the leaves and twigs of the evergreen desert shrub, Larrea tridentata (Sesse and Moc. ex DC) Coville (creosote bush). It is a recognized inhibitor of lipoxygenase (LOX) and has antioxidant and free radical scavenging properties.	302.36	500-38-9	C18H22O4	CC(CC1=CC=C(O)C(=C1)O)C(C)CC2=CC=C(O)C(=C2)O	39.5894	27.6776
WAY-320461	FAK	Angiogenesis,Cytoskeletal Signaling	FAK inhibitors	376.228	491839-65-7	C15H10BrN3O2S	BrC1=CC=C(C=C1)C(=O)CSC2=NN=C(O2)C3=CC=NC=C3	16.3641	-8.81718
Sesamol	Others	Others	Sesamol, a natural organic compound, is regarded as a major antioxidant component in the oil with chemoprevention, antimutagenic, and antihepatotoxic activities. It induces apoptosis of cancer and cardiovascular cells.	138.12	533-31-3	C7H6O3	OC1=CC2=C(OCO2)C=C1	13.82	10.7289
WAY-301464	Pim-1	kinase	Pim-1 inhibitor	287.315	79492-49-2	C18H13N3O	NC1=C(C#N)C(=CC(=N1)C2=CC=C(O)C=C2)C3=CC=CC=C3	12.232	10.3088
AZD3463	ALK,IGF-1R	Protein Tyrosine Kinase	AZD3463 is a novel orally bioavailable ALK inhibitor with Ki of 0.75 nM, which also inhibits IGF1R with equivalent potency.	448.95	1356962-20-3	C24H25ClN6O	COC1=C(NC2=NC(=C(Cl)C=N2)C3=C[NH]C4=C3C=CC=C4)C=CC(=C1)N5CCC(N)CC5	26.7789	18.8396
6-Bromo-2-hydroxy-3-methoxybenzaldehyde	Others	Others	6-Bromo-2-hydroxy-3-methoxybenzaldehyde is a bromobenzaldehyde derivative that participates in the synthesis of (±)-norannuradhapurine.	231.04	20035-41-0	C8H7BrO3_x000D_	COC1=CC=C(Br)C(=C1O)C=O	33.5799	26.7189
Esculin	Others	Others	Esculin is a glucoside found in horse chestnuts.	340.28	531-75-9	C15H16O9	OCC1OC(OC2=C(O)C=C3OC(=O)C=CC3=C2)C(O)C(O)C1O	14.0207	8.18598
WAY-320081	glucokinase,heat shock protein 90	others	glucokinase activators; inhibitors of heat shock protein 90 ;	287.337	66780-67-4	C14H13N3O2S	CC1=NC(=CS1)C2=C[NH]N=C2C3=C(O)C=C(O)C(=C3)C	21.6391	2.79075
Ceritinib dihydrochloride	ALK	Protein Tyrosine Kinase	Ceritinib (Zykadia, LDK378) dihydrochloride is a selective, orally bioavailable and ATP-competitive inhibitor of <b>ALK</b> with IC50 of 0.2 nM. Ceritinib dihydrochloride also inhibits <b>InsR</b>, <b>IGF-1R</b> and <b>STK22D</b> with IC50 of 7 nM, 8 nM and 23 nM, respectively. Ceritinib exhibits antitomor activity.	631.06	1380575-43-8	C28H38Cl3N5O3S_x000D_	Cl.Cl.CC(C)OC1=C(NC2=NC=C(Cl)C(=N2)NC3=CC=CC=C3[S](=O)(=O)C(C)C)C=C(C)C(=C1)C4CCNCC4	-0.38518	-15.7942
NVP-BHG712	Bcr-Abl,Ephrin receptor,Raf,Src	Protein Tyrosine Kinase	NVP-BHG712 is a specific EphB4 inhibitor with ED50 of 25 nM that discriminates between VEGFR and EphB4 inhibition also shows activity against c-Raf, c-Src and c-Abl with IC50 of 0.395 μM, 1.266 μM and 1.667 μM, respectively.	503.48	940310-85-0	C26H20F3N7O	C[N]1N=CC2=C1N=C(N=C2NC3=CC(=CC=C3C)C(=O)NC4=CC=CC(=C4)C(F)(F)F)C5=CC=CN=C5	37.3287	3.17317
CID755673	Serine/threonin kinase,CaMK	Apoptosis	CID755673 is a cell-active pan-<b>PKD1/2/3</b> inhibitor with <b>IC50</b> of 180 nM, 280nM, and 227 nM, respectively, about 200-fold selectivity over other CAMKs. _x000D_	217.22	521937-07-5	C12H11NO3	OC1=CC2=C(OC3=C2CCCNC3=O)C=C1	16.3193	6.7368
CL-230482	PDGFR	Protein Tyrosine Kinase & Angiogenesis	PDGFR inhibitor	236.269	909859-35-4	C15H12N2O	CC(=O)C1=CC=C(C=C1)[N]2C=NC3=C2C=CC=C3	23.7743	34.6515
Baricitinib phosphate	JAK	JAK/STAT	Baricitinib phosphate is a selective <b>JAK1</b> and <b>JAK2</b> inhibitor with IC50 of 5.9 nM and 5.7 nM, ~70 and ~10-fold selective versus JAK3 and Tyk2, no inhibition to c-Met and Chk2.	469.41	1187595-84-1	C16H20N7O6PS	CC[S](=O)(=O)N1CC(CC#N)(C1)[N]2C=C(C=N2)C3=NC=NC4=C3C=C[NH]4.O[P](O)(O)=O	48.391	25.3987
CL-104773	TLR, JAK2, fatty acid amide hydrolase	Immunology & Inflammation, JAK/STAT,Epigenetics ,Angiogenesis,Stem Cells,Wnt	TLR2 Antagonists; inhibitor of JAK2 tyrosine kinase; inhibitors of fatty acid amide hydrolase;	262.306	802980-92-3	C17H14N2O	O=C(NC1=CC=CC=C1)NC2=CC3=C(C=CC=C3)C=C2	30.0999	14.7492
DMH1	TGF-beta/Smad	TGF-beta/Smad	DMH1 is a selective BMP receptor inhibitor with IC50 of 107.9 nM for ALK2, exhibiting no inhibition on AMPK, ALK5, KDR (VEGFR-2) or PDGFR.	380.44	1206711-16-1	C24H20N4O	CC(C)OC1=CC=C(C=C1)C2=C[N]3N=CC(=C3N=C2)C4=CC=NC5=C4C=CC=C5	43.0528	14.9031
WAY-649123	TGF-β,p38-a	TGF-beta/Smad,Stem Cells,Wnt,MAPK	preventive and therapeutic effect for diabetes and obesity; TGF-β inhibitors; TGF-b and/or p38-a kinase inhibitors;	326.394	801244-46-2	C21H18N4	C(CC1=CC=CC=N1)NC2=NC(=NC3=C2C=CC=C3)C4=CC=CC=C4	28.2994	20.5589
WAY-320426	Mycobacterium tuberculosis shikimate kinase	Microbiology	Mycobacterium tuberculosis shikimate kinase inhibitors	291.733	312601-47-1	C14H14ClN3O2	CC1=N[N](C(=C1)C)C(=O)CNC(=O)C2=CC=CC(=C2)Cl	10.7031	-1.04236
Duvelisib (IPI-145, INK1197)	PI3K	Angiogenesis	Duvelisib (IPI-145, INK1197) is a novel and selective PI3K δ/γ inhibitor with Ki and IC50 of 23 pM/243 pM and 1 nM/50 nM in cell-free assays, highly selective for PI3K δ/γ than other protein kinases. Phase 3.	416.86	1201438-56-3	C22H17ClN6O	CC(NC1=NC=NC2=C1N=C[NH]2)C3=CC4=CC=CC(=C4C(=O)N3C5=CC=CC=C5)Cl	32.9258	40.2782
WAY-272160	topoisomerase II,HER2	DNA Damage, Protein Tyrosine Kinase,Angiogenesis	inhibitory activities for topoisomerase II and HER2; topoisomerase I & II inhibitory activity and antiproliferative activity;	340.76	489413-54-9	C18H13ClN2O3	ClC1=CC=C(C=C1)C2=NN(C(C2)C3=CC=CO3)C(=O)C4=CC=CO4	1.56744	1.32613
AG-126	ERK	MAPK	AG126 is a <b>tyrosine kinase</b> inhibitor which selectively inhibits the phosphorylation of ERK1 (p44) and ERK2 (p42) at 25-50 μM.	215.16	118409-62-4	C10H5N3O3_x000D_	OC1=CC(=CC=C1[N+]([O-])=O)C=C(C#N)C#N	17.2894	19.7446
Voxtalisib (SAR245409, XL765) Analogue	mTOR,PI3K	PI3K/Akt/mTOR	Voxtalisib (SAR245409, XL765) Analogue is a dual inhibitor of mTOR/PI3K, mostly for p110γ with IC50 of 9 nM also inhibits DNA-PK and mTOR. Phase 1/2.	599.66	1349796-36-6	C31H29N5O6S	COC1=CC(=CC(=C1)NC2=NC3=CC=CC=C3N=C2N[S](=O)(=O)C4=CC=C(NC(=O)C5=CC=C(C)C(=C5)OC)C=C4)OC	39.5918	7.0712
GZD824 Dimesylate	Bcr-Abl	Angiogenesis	GZD824 Dimesylate is a novel orally bioavailable Bcr-Abl inhibitor for Bcr-Abl(WT) and Bcr-Abl(T315I) with IC50 of 0.34 nM and 0.68 nM, respectively.	724.77	1421783-64-3	C31H35F3N6O7S2	CN1CCN(CC1)CC2=C(C=C(NC(=O)C3=CC(=C(C)C=C3)C#CC4=CC5=C([NH]N=C5)N=C4)C=C2)C(F)(F)F.C[S](O)(=O)=O.C[S](O)(=O)=O	55.6125	17.5592
WAY-298350	A kinase anchor protein/protein kinase A interaction	others	inhibitors of A kinase anchor protein/protein kinase A interaction	283.322	304888-67-3	C17H17NO3	CC1=CC(=CC(=C1)C)NC(=O)C2COC3=CC=CC=C3O2	22.2812	11.4099
Forsythoside B	Others	antioxidant	Forsythoside B inhibits inflammatory response,and has antioxidant properties. (1) Potent neuroprotective effects with a favorable therapeutic time-window, reduce of cerebral ischemia and reperfusion injury degree, attenuating blood-brain barrier (BBB) breakdown; (2) Rescued cardiac function from I/R injury. Forsythoside B has antisepsis effect, is mediated by decreasing local and systemic levels …	756.702	81525-13-5	C34H44O19	CC1OC(OC2C(O)C(OCCC3=CC=C(O)C(=C3)O)OC(COC4OCC(O)(CO)C4O)C2OC(=O)/C=C/C5=CC(=C(O)C=C5)O)C(O)C(O)C1O	14.0744	5.82521
Cucurbitacin IIb	STAT	JAK/STAT	Cucurbitacin IIb (CuIIb, Dihydrocucurbitacin F, 25-deacetyl hemslecin A) inhibits phosphorylation of STAT3, JNK and Erk1/2, enhances the phosphorylation of IκB and NF-κB, blocks nuclear translocation of NF-κB and decreases mRNA levels of IκBα and TNF-α. Cucurbitacin IIb exhibits anti-inflammatory activity and induces apoptosis. Cucurbitacin IIb is isolated from Hemsleya amabilis.	520.7	50298-90-3	C30H48O7_x000D_	CC(C)(O)CCC(=O)C(C)(O)C1C(O)CC2(C)C3CC=C4C(CC(O)C(O)C4(C)C)C3(C)C(=O)CC12C	9.04639	4.32954
WAY-329607	kinase	others	kinase inhibitory activity	385.821	956920-91-5	C14H9ClFN3O3S2	FC1=C(Cl)C=C(NC(=O)C[S](=O)(=O)C2=CC=CC3=NSN=C23)C=C1	13.9979	22.1841
Lidocaine	Histamine Receptor	Neuronal Signaling	Lidocaine is a selective inverse peripheral histamine H1-receptor agonist with an IC50 of >32 μM.	234.34	137-58-6	C14H22N2O	CCN(CC)CC(=O)NC1=C(C)C=CC=C1C	20.5015	15.7311
FR 180204	ERK	MAPK	FR 180204 is an ATP-competitive, selective ERK inhibitor with Ki of 0.31 μM and 0.14 μM for ERK1 And ERK2, respectively. It is 30-fold less potent against the related kinase p38α and failed to inhibit any kinases(MEK1, MKK4, IKKα, PKCα, Src, Syc, and PDGFα) at less than 30 μM.	327.34	865362-74-9	C18H13N7	NC1=N[NH]C2=C1C=C(N=N2)C3=C4C=CC=C[N]4N=C3C5=CC=CC=C5	-2.19346	24.8843
Anacardic Acid	Histone Acetyltransferase	Epigenetics	Anacardic Acid is a potent inhibitor of p300 and p300/CBP-associated factor histone acetyltranferases, which also has antibacterial activity, antimicrobial activity, prostaglandin synthase inhibition, and tyrosinase and lipoxygenase inhibition.	348.52	16611-84-0	C22H36O3	CCCCCCCCCCCCCCCC1=CC=CC(=C1C(O)=O)O	-22.5755	18.4565
WAY-652641	CDK	Cell Cycle	CDK inhibitor	198.219	852851-73-1	C9H14N2O3	CC(C)CN1NC(=CC1=O)CC(O)=O	14.7033	-1.67463
ML-9 HCl	Akt	PI3K/Akt/mTOR	ML-9 HCl (ML-9 hydrochloride) is a selective and potent inhibitor of Akt kinase, myosin light chain kinase (MLCK) and stromal interaction molecule 1 (STIM1). ML-9 HCl is also a potent inhibitor of Ca2+-permeable channels. ML-9 HCl is a lysosomotropic agent targeting autophagy and cell death.	361.29	105637-50-1	C15H18Cl2N2O2S_x000D_	Cl.ClC1=CC=CC2=C1C=CC=C2[S](=O)(=O)N3CCCNCC3	4.3784	15.0594
WAY-660222	EGFR	Protein Tyrosine Kinase & Angiogenesis & JAK/STAT	EGFR kinase inhibitor; antitumor agent;	276.304	867294-23-3	C19H13FO	FC1=C(C=CC=C1)C(=O)/C=C/C2=CC3=C(C=CC=C3)C=C2	-0.820369	18.2885
NIH-12848	Others	Others	NIH-12848 is a specific PI5P4Kγ inhibitor with an IC50 of approximately 1 μM but does not inhibit the α and β PI5P4K isoforms at concentrations up to 100 μM.	385.41	959551-10-1	C20H14F3N3S_x000D_	FC(F)(F)C1=CC=CC=C1C2=NC3=CC=CC=C3C(=N2)NCC4=CC=CS4	30.3741	24.7605
Barasertib (AZD1152-HQPA)	Aurora Kinase	Cell Cycle	Barasertib (AZD1152-HQPA) is a highly selective Aurora B inhibitor with IC50 of 0.37 nM in a cell-free assay, ~3700 fold more selective for Aurora B over Aurora A. Phase 1.	507.56	722544-51-6	C26H30FN7O3	CCN(CCO)CCCOC1=CC=C2C(=NC=NC2=C1)NC3=CC(=N[NH]3)CC(=O)NC4=CC=CC(=C4)F	17.4859	-10.6051
6H05	Rho	Cell Cycle	6H05 is a selective, and allosteric inhibitor of oncogenic K-Ras(G12C).	590.14	2061344-88-3	C22H31ClF3N3O4S3	CN(C)CCSSCCNC(=O)C1CCN(CC1)C(=O)CSC2=CC=C(Cl)C=C2.OC(=O)C(F)(F)F	20.5374	21.9803
Zotarolimus(ABT-578)	mTOR	PI3K/Akt/mTOR	Zotarolimus (ABT-578) is an analogue of rapamycin, and inhibits FKBP-12 binding with IC50 of 2.8 nM.	966.21	221877-54-9	C52H79N5O12	COC1CC(CCC1[N]2C=NN=N2)CC(C)C3CC(=O)C(C)/C=C(C)/C(O)C(OC)C(=O)C(C)CC(C)/C=C/C=C/C=C(C)/C(CC4CCC(C)C(O)(O4)C(=O)C(=O)N5CCCCC5C(=O)O3)OC	47.6376	51.1534
WAY-329685	Abl	Angiogenesis	ABL kinase inhibiting activities	469.532	943934-25-6	C28H27N3O4	COCCN1C(C(C(=O)NC2=CC=CC(=C2)OC)C3=CC=CC=C3C1=O)C4=C[NH]C5=C4C=CC=C5	-2.7546	25.0859
Azoramide	PERK	Apoptosis	Azoramide is a small-molecule modulator of the unfolded protein response (UPR). It improves ER protein-folding ability and activates ER chaperone capacity to protect cells against ER stress.	308.83	932986-18-0	C15H17ClN2OS	CCCC(=O)NCCC1=CSC(=N1)C2=CC=C(Cl)C=C2	58.3295	18.4255
WAY-653005	others	others	k opioid receptor antagonist; COMT inhibitory activity; ROCK inhibitor; RORγ modulator; ROS tyrosine kinase inhibitor; BACE2 inhibitor; trkA receptor-inhibiting activity; ASK1 inhibitor; LXR modulator; β-secretase inhibitor; androgen receptor modulator;	177.243	74190-66-2	C11H15NO	COC1=CC=C(C=C1)C2CCCN2	0.106715	0.164275
Trigonelline	Phospholipase (e.g. PLA) PLCγ1,PI3K,Akt	Metabolism	Trigonelline (Trigenolline) is a plant alkaloid and a major component of coffee and fenugreek with anti-degranulation, anti-diabetic, antioxidant, anti-inflammatory, and neuroprotective effects. Trigonelline inhibits FcεRI-mediated intracellular signaling pathways, such as phosphorylation of PLCγ1, PI3K, and Akt. Trigonelline (Trigenolline) also inhibits the microtubule formation in RBL-2H3 cells.	137.14	535-83-1	C7H7NO2_x000D_	C[N+]1=CC(=CC=C1)C([O-])=O	9.36174	-0.197575
Purvalanol B	CDK	Cell Cycle	Purvalanol B (NG-95) is a potent and selective inhibitor of <b>cyclin-dependent kinase (CDK)</b> with IC50 of 6 nM, 6 nM, 9 nM and 6 nM for cdc2-cyclin B, CDK2-cyclin A, CDK2-cyclin E and CDK5-p35, respectively.	432.9	212844-54-7	C20H25ClN6O3_x000D_	CC(C)C(CO)NC1=NC2=C(N=C[N]2C(C)C)C(=N1)NC3=CC=C(C(O)=O)C(=C3)Cl	-2.21385	23.0396
L-779450	Raf	MAPK	L-779450 is a highly potent low nanomolar inhibitor of <b>B-raf</b> with IC50 of 10 nM and Kd of 2.4 nM.	347.8	303727-31-3	C20H14ClN3O	OC1=CC(=CC=C1Cl)C2=C(N=C([NH]2)C3=CC=CC=C3)C4=CC=NC=C4	12.8536	-3.2023
PF 4800567	Casein Kinase	Stem Cells & Wnt	PF 4800567 is a novel and potent inhibitor of <b>casein kinase 1 epsilon</b> (IC50=32 nM) with greater than 20-fold selectivity over <b>casein kinase 1 delta</b>(IC50=711 nM).	359.81	1188296-52-7	C17H18ClN5O2_x000D_	NC1=NC=NC2=C1C(=N[N]2C3CCOCC3)COC4=CC=CC(=C4)Cl	10.8556	4.50913
4E1RCat	Others	Others	4E1RCat is a dual inhibitor of eIF4E:eIF4G and eIF4E:4E-BP1 interaction, and inhibits the binding of eIF4G to eIF4E with IC50 of 3.2 μM.	478.45	328998-25-0	C28H18N2O6	OC(=O)C1=CC=C(C=C1)N2C(=O)\C(=C\C3=CC=C(O3)C4=CC=C(C=C4)[N+]([O-])=O)C=C2C5=CC=CC=C5	33.6314	19.233
WAY-299359	FLT3, Tubulin	Angiogenesis ,Protein Tyrosine Kinase ,Cytoskeletal Signaling	FLT3 inhibitor; Tubulin Inhibitor; altering the lifespan of a eukaryotic organism;	294.369	1005057-81-7	C14H18N2O3S	NC(=O)C1=C(NC(=O)C2CCCO2)SC3=C1CCCC3	9.94506	3.55922
WAY-301300	Rho kinase,bacterial DNA adenine methyltransferases	Cell Cycle,DNA Damage	Rho kinase inhibitors	287.31	935279-95-1	C16H17NO4	CCOC(=O)C1NC2=CC=C(C=C2C3C=CCC13)C(O)=O	-5.73237	33.4781
Y-39983 HCl	ROCK	Cell Cycle	Y-39983 is a selective rho-associated protein kinase(ROCK) inhibitor with an IC50 of 3.6 nM.	353.25	173897-44-4	C16H18Cl2N4O	Cl.Cl.CC(N)C1=CC=C(C=C1)C(=O)NC2=C3C=C[NH]C3=NC=C2	32.7674	33.5445
Olmutinib (HM61713, BI 1482694)	EGFR,BTK	Protein Tyrosine Kinase	Olmutinib is a novel third-generation epidermal growth factor receptor (EGFR) mutation-specific tyrosine kinase inhibitor (TKI). Also a potent inhibitor of Bruton's tyrosine kinase.	486.59	1353550-13-6	C26H26N6O2S	CN1CCN(CC1)C2=CC=C(NC3=NC(=C4SC=CC4=N3)OC5=CC=CC(=C5)NC(=O)C=C)C=C2	-11.5672	-16.9238
Gallein	PI3K	PI3K/Akt/mTOR	Gallein (Pyrogallol phthalein) is an inhibitor of <b>G protein βγ (G beta-gamma complex, Gβγ)</b> subunit interaction with <b>PI3 kinase</b>. Gallein inhibits β-ionone effects and exhibits anti-tumor activity. Gallein can be used as a biological stain.	364.31	2103-64-2	C20H12O7_x000D_	OC1=C(O)C2=C(C=C1)C3(OC(=O)C4=CC=CC=C34)C5=C(O2)C(=C(O)C=C5)O	36.5056	-1.05911
PI-103	Autophagy,DNA-PK,mTOR,PI3K	PI3K/Akt/mTOR	PI-103 is a multi-targeted PI3K inhibitor for p110α/β/δ/γ with IC50 of 2 nM/3 nM/3 nM/15 nM in cell-free assays, less potent to mTOR/DNA-PK with IC50 of 30 nM/23 nM.	348.36	371935-74-9	C19H16N4O3	OC1=CC(=CC=C1)C2=NC3=C(OC4=C3C=CC=N4)C(=N2)N5CCOCC5	28.5656	-6.10089
Imatinib Mesylate (STI571)	Bcr-Abl,c-Kit,PDGFR	Protein Tyrosine Kinase	Imatinib Mesylate (STI571) is an orally bioavailability mesylate salt of Imatinib, which is a multi-target inhibitor of v-Abl, c-Kit and PDGFR with IC50 of 0.6 μM, 0.1 μM and 0.1 μM in cell-free or cell-based assays, respectively.	589.71	220127-57-1	C30H35N7O4S	CN1CCN(CC1)CC2=CC=C(C=C2)C(=O)NC3=CC=C(C)C(=C3)NC4=NC=CC(=N4)C5=CC=CN=C5.C[S](O)(=O)=O	61.0687	8.43789
WAY-297174	CK2,MtSk	Metabolism & Stem Cells & Wnt	CK2 inhibitor; MtSk inhibitors;	268.355	442571-27-9	C11H12N2O2S2	CC(SC1=NC=NC2=C1C(=C(C)S2)C)C(O)=O	0.797025	6.79903
WAY-340245	ERK	MAPK	ERK inhibitor	292.31	350509-85-2	C13H12N2O4S	NCCN1C(=O)SC(=C/C2=CC3=C(OCO3)C=C2)/C1=O	-1.31367	12.333
Tacrolimus (FK506)	mTOR	PI3K/Akt/mTOR	Tacrolimus (FK506) is a 23-membered macrolide lactone, it reduces peptidyl-prolyl isomerase activity in T cells by binding to the immunophilin FKBP12 (FK506 binding protein) creating a new complex.	804.02	104987-11-3	C44H69NO12	COC1CC(CCC1O)\C=C(C)\C2OC(=O)C3CCCCN3C(=O)C(=O)C4(O)OC(C(CC(C)C/C(=C/C(CC=C)C(=O)CC(O)C2C)C)OC)C(CC4C)OC	5.5071	6.84106
Opaganib (ABC294640)	S1P Receptor	GPCR & G Protein	Opaganib (ABC294640) is an orally bioavailable and selective sphingosine kinase-2 (SphK2) inhibitor with IC50 of approximately 60 μM. Phase 1/2.	380.91	915385-81-8	C23H25ClN2O	ClC1=CC=C(C=C1)[C]23CC4[CH2]C(C[C](C4)(C2)C(=O)NCC5=CC=NC=C5)C3	8.85838	16.9337
WAY-329686	Abl	Angiogenesis	ABL kinase inhibiting activities	419.516	943934-31-4	C25H29N3O3	CCC(C)NC(=O)C1C(N(CCOC)C(=O)C2=CC=CC=C12)C3=C[NH]C4=C3C=CC=C4	-5.72962	18.9696
3PO	phosphatase	Others	3PO is a small-molecule inhibitor of PFKFB3 with an IC50 of 22.9 μM for recombinant human PFKFB3 protein and does not inhibit PFK-1 activity. It suppresses glucose uptake, and decreases the intracellular concentration of Fru-2,6-BP, lactate, ATP, NAD+, and NADH.	210.23	18550-98-6	C13H10N2O	O=C(/C=C/C1=CC=CN=C1)C2=CC=NC=C2	45.5242	11.9683
WAY-637845	kinase	others	protein kinase inhibitor; fatty acid synthase inhibitor;	287.097	794539-14-3	C10H10INO	IC1=CC=C(C=C1)C(=O)NC2CC2	7.72348	8.62812
Taxifolin (Dihydroquercetin)	VEGFR	Angiogenesis	Taxifolin, type I inhibitor for VEGFR-2 kinase, is a flavonoid in many plants such as Taxus chinensis, Siberian larch, Cedrus deodara and so on.	304.25	480-18-2	C15H12O7	OC1C(OC2=CC(=CC(=C2C1=O)O)O)C3=CC(=C(O)C=C3)O	33.9561	5.13141
ENMD-2076	Aurora Kinase,FLT3,VEGFR	Angiogenesis	ENMD-2076 has selective activity against Aurora A and Flt3 with IC50 of 14 nM and 1.86 nM, 25-fold selective for Aurora A than over Aurora B and less potent to VEGFR2/KDR and VEGFR3, FGFR1 and FGFR2 and PDGFRα. Phase 2.	375.47	934353-76-1	C21H25N7	CN1CCN(CC1)C2=CC(=NC(=N2)\C=C\C3=CC=CC=C3)NC4=N[NH]C(=C4)C	45.68	29.688
ML167	CDK	Cell Cycle	ML167 is a highly selective Cdc2-like kinase 4 (Clk4) inhibitor with IC50 of 136 nM, >10-fold selectivity for closely related kinases Clk1-3 and Dyrk1A/1B.	335.36	1285702-20-6	C19H17N3O3	CC1=CC=C(CNC2=NC=NC3=CC=C(C=C23)C4=CC=C(CO)O4)O1	5.15787	20.9535
L-Quebrachitol	TGF-beta/Smad	Cell Cycle	L-Quebrachitol (L-QCT), a natural product isolated from many plants, promotes proliferation and cell DNA synthesis. L-Quebrachitol upregulates bone morphogenetic protein-2 (BMP-2) and runt-related transcription factor-2 (Runx2) and regulatory genes associated with mitogen-activated protein kinase (MAPK) and Wnt/β-catenin signaling pathway, while down-regulating the receptor activator of the nucle…	194.18	642-38-6	C7H14O6_x000D_	COC1C(O)C(O)C(O)C(O)C1O	7.61835	-1.92916
Artemisinin	Anti-infection	Microbiology	Artemisinin is a sesquiterpene endoperoxide which is a potent antimalarial agent.	282.33	63968-64-9	C15H22O5	CC1CCC2C(C)C(=O)OC3OC4(C)CCC1C23OO4	18.4665	14.506
WAY-634704	Aurora kinase A	Cell Cycle & Epigenetics	Aurora kinase A inhibitor	344.771	781619-26-9	C13H13ClN2O5S	CC1(C)NC(=O)N(CC(=O)OCC(=O)C2=CC=C(Cl)S2)C1=O	-15.8624	-0.117189
ENMD-2076 L-(+)-Tartaric acid	Aurora Kinase,FLT3,VEGFR	Angiogenesis	ENMD-2076 L-(+)-Tartaric acid is the tartaric acid of ENMD-2076, selective activity against Aurora A and Flt3 with IC50 of 14 nM and 1.86 nM, 25-fold more selective for Aurora A than Aurora B and less potent to VEGFR2/KDR and VEGFR3, FGFR1 and FGFR2 and PDGFRα. Phase 2.	525.56	1291074-87-7	C25H31N7O6	CN1CCN(CC1)C2=NC(=NC(=C2)NC3=N[NH]C(=C3)C)\C=C\C4=CC=CC=C4.OC(C(O)C(O)=O)C(O)=O	45.8589	18.4457
Farrerol	Others	Others	Farrerol, an important bioactive constituent of rhododendron, exhibits broad activities such as anti-oxidative and anti-inflammatory effects.	300.31	24211-30-1	C17H16O5	CC1=C(O)C2=C(OC(CC2=O)C3=CC=C(O)C=C3)C(=C1O)C	16.1444	23.0458
HS-173	PI3K	PI3K/Akt/mTOR	HS-173 is a potent PI3Kα inhibitor with IC50 of 0.8 nM.	422.46	1276110-06-5	C21H18N4O4S	CCOC(=O)C1=CN=C2C=CC(=C[N]12)C3=CN=CC(=C3)N[S](=O)(=O)C4=CC=CC=C4	18.7619	13.3392
Alectinib (CH5424802)	ALK	Protein Tyrosine Kinase	Alectinib (CH5424802) is a potent <b>ALK</b> inhibitor with <b>IC50</b> of 1.9 nM in cell-free assays, sensitive to L1196M mutation and higher selectivity for ALK than PF-02341066, NVP-TAE684 and PHA-E429.	482.62	1256580-46-7	C30H34N4O2	CCC1=CC2=C(C=C1N3CCC(CC3)N4CCOCC4)C(C)(C)C5=C(C2=O)C6=CC=C(C=C6[NH]5)C#N	37.1705	-1.30796
Baricitinib (LY3009104, INCB028050)	JAK	JAK/STAT	Baricitinib (LY3009104, INCB028050) is a selective JAK1 and JAK2 inhibitor with IC50 of 5.9 nM and 5.7 nM in cell-free assays, ~70 and ~10-fold selective versus JAK3 and Tyk2, no inhibition to c-Met and Chk2. Phase 3.	371.42	1187594-09-7	C16H17N7O2S	CC[S](=O)(=O)N1CC(CC#N)(C1)[N]2C=C(C=N2)C3=NC=NC4=C3C=C[NH]4	51.7167	38.1743
WAY-656935	ROCK, ERK, GSK, and AGC	Cell Cycle,TGF-beta/Smad,Stem Cells,Wnt,	ROCK Inhibitor; inhibitor of ROCK, ERK, GSK, and AGC protein kinases;	325.385	852902-81-9	C17H15N3O2S	COC1=C(CC(=O)NC2=NC(=CS2)C3=CC=NC=C3)C=CC=C1	11.0883	2.33663
WAY-299562	PKA,AKAP	GPCR & G Protein	modulator of the interaction of protein kinase A (PKA) and A kinase anchor proteins (AKAP)	267.279	299934-88-6	C16H13NO3	CC1=CC=C(O1)\C=C2/N=C(OC2=O)C3=CC=CC(=C3)C	4.2886	4.10933
MT-802	BTK	Angiogenesis	MT-802 is a potent PROTAC that induces Bruton's tyrosine kinase (BTK) knockdown. MT-802 recruits BTK to the cereblon E3 ubiquitin ligase complex to trigger BTK ubiquitination and degradation via the proteasome. MT-802 has potential for treatment of C481S mutant chronic lymphocytic leukemia (CLL).	787.82	2231744-29-7	C41H41N9O8_x000D_	NC1=C2C(=NC=N1)[N](N=C2C3=CC=C(OC4=CC=CC=C4)C=C3)C5CCN(CCOCCOCC(=O)NC6=CC7=C(C=C6)C(=O)N(C8CCC(=O)NC8=O)C7=O)CC5	7.44943	-10.2689
(4S)-4-Hydroxy-L-isoleucine	Others	Others	Lowering of plasma triglyceride level in dyslipidemic male syrian hamsters at 50 mg/kg, po	147.172	55399-93-4	C6H13NO3	CC(O)C(C)C(N)C(O)=O	-0.698379	34.9987
PF-670462	Casein Kinase	Metabolism	PF-670462 is a potent and selective inhibitor of <b>CK1ε</b> and <b>CK1δ</b> with IC50 value of 90 nM and 13 nM, respectively.	410.32	950912-80-8	C19H22Cl2FN5_x000D_	Cl.Cl.NC1=NC=CC(=N1)C2=C(N=C[N]2C3CCCCC3)C4=CC=C(F)C=C4	25.3878	6.65556
GMB-475	PROTAC	Angiogenesis	GMB-475 is a proteolysis-targeting chimera (PROTAC) that allosterically targets <b>BCR-ABL1</b> protein and recruit <b>the E3 ligase</b> Von Hippel-Lindau (VHL), resulting in ubiquitination and subsequent degradation of the oncogenic fusion protein.	861.93	No CAS	C43H46F3N7O7S_x000D_	CC1=C(SC=N1)C2=CC=C(CNC(=O)C3CC(O)CN3C(=O)C(NC(=O)COCCOC4=CC=C(C=C4)C5=CC(=NC=N5)NC6=CC=C(OC(F)(F)F)C=C6)C(C)(C)C)C=C2	27.8663	30.5498
LX2343	BACE	Neuronal Signaling	LX2343 is a multi-target agent that exhibits a high capability for ameliorating multi-abnormalities of AD pathogenesis. It is a BACE1 enzyme inhibitor with an IC50 value of 11.43±0.36 μM.	474.91	333745-53-2	C22H19ClN2O6S_x000D_	COC1=CC=C(Cl)C=C1N(CC(=O)NC2=CC=C3OCOC3=C2)[S](=O)(=O)C4=CC=CC=C4	28.8203	26.4575
Alantolactone	TGF-beta/Smad	TGF-beta/Smad	Alantolactone, a naturally occurring eudesmane-type sesquiterpene lactone (SL), could induce activin/SMAD3 signaling and disrupt Cripto-1/activin receptor type II A interaction.	232.32	546-43-0	C15H20O2	CC1CCCC2(C)CC3OC(=O)C(=C)C3C=C12	15.5535	2.70899
WAY-388756	IKKb	PI3K/Akt/mTOR	IKKb inhibitors	266.77	243669-62-7	C11H7ClN2S2	CC1=NC2=C(C(=N1)Cl)C(=CS2)C3=CC=CS3	2.05708	26.4289
MLN0905	PLK	Cell Cycle	MLN0905 is a potent inhibitor of PLK1 with IC50 of 2 nM.	486.56	1228960-69-7	C24H25F3N6S	CN(C)CCCC1=CC(=C(C)N=C1)NC2=NC3=C(CC(=S)NC4=CC(=CC=C34)C(F)(F)F)C=N2	21.3691	13.2911
n-Butylidenephthalide	Others	Others	n-Butylidenephthalide, isolated from the chloroform extract of <i>Angelica sinensis</i> (AS-C), contributes to a range of biological activities, including diminution of angina, platelet aggregation, proliferation, non-specific spasmosis.	188.22	551-08-6	C12H12O2_x000D_	CCC/C=C/1OC(=O)C2=C1C=CC=C2	-1.32849	15.1706
Osimertinib (AZD9291)	EGFR	Protein Tyrosine Kinase	Osimertinib (AZD9291) is an oral, irreversible, and mutant-selective EGFR inhibitor with IC50 of 12.92, 11.44 and 493.8 nM for Exon 19 deletion EGFR, L858R/T790M EGFR, and WT EGFR in LoVo cells, respectively. Phase 3.	499.61	1421373-65-0	C28H33N7O2	COC1=C(NC2=NC=CC(=N2)C3=C[N](C)C4=C3C=CC=C4)C=C(NC(=O)C=C)C(=C1)N(C)CCN(C)C	-1.63498	-17.4468
WAY-381332	CDK9	Cell Cycle	Mimetic CDK9 Inhibitors	290.361	380163-63-3	C13H10N2O2S2	OC(=O)C1=CC=CC=C1SCC2=C[N]3C=CSC3=N2	5.16809	4.19869
Motesanib (AMG-706)	VEGFR	Protein Tyrosine Kinase	Motesanib (AMG-706) is an orally bioavailable <b>receptor tyrosine kinase</b> inhibitor with IC50 values of 2 nM, 3 nM, 6 nM, 8 nM, 84 nM, 59 nM for VEGFR1, VEGFR2, VEGFR3, Kit, PDGFR and Ret, respectively.	373.45	453562-69-1	C22H23N5O	CC1(C)CNC2=CC(=CC=C12)NC(=O)C3=C(NCC4=CC=NC=C4)N=CC=C3	44.9312	20.5044
A66	PI3K	PI3K/Akt/mTOR	A66 is a potent and specific p110α inhibitor with IC50 of 32 nM in a cell-free assay, >100 fold selectivity for p110α over other class-I PI3K isoforms.	393.53	1166227-08-2	C17H23N5O2S2	CC1=C(SC(=N1)NC(=O)N2CCCC2C(N)=O)C3=CSC(=N3)C(C)(C)C	28.1775	17.0721
SAR125844	c-Met	Protein Tyrosine Kinase	SAR125844 is a potent intravenously active and highly selective <b>MET</b> kinase inhibitor, displaying nanomolar activity against the wild-type kinase (IC50 value of 4.2 nmol/L) and H1094Y, Y1235D, M1250T, L1195V, and D1228H kinase domain mutants (IC50 values of 0.22, 1.7, 6.5, 65, and 81 nmol/L, respectively).	550.63	1116743-46-4	C25H23FN8O2S2_x000D_	FC1=CC=C(C=C1)C2=N[N]3C(=NN=C3C=C2)SC4=CC=C5N=C(NC(=O)NCCN6CCOCC6)SC5=C4	-5.32772	18.0541
GDC-0077	PI3K	PI3K/Akt/mTOR	GDC-0077 (RG6114) is a potent selective inhibitor of PI3K alpha (PI3Kα) with an IC50 of 0.038 nM. GDC-0077 is >300-fold more selective for PI3K alpha over the other class I PI3K isoforms (beta, delta, and gamma) and >2000-fold more selective over PIK family members. GDC-0077 binds to the ATP binding site of PI3K and inhibits the phosphorylation of PIP2 to PIP3.	407.37	2060571-02-8	C18H19F2N5O4_x000D_	CC(NC1=CC=C2C(=C1)OCC[N]3C=C(N=C23)N4C(COC4=O)C(F)F)C(N)=O	19.5813	0.189282
WAY-312858	CK2	Metabolism & Stem Cells & Wnt	CK2 inhibitors	349.468	620570-09-4	C17H19NO3S2	CCOC(=O)C1=C(NC(=O)CSC2=CC=CC=C2)SC(=C1C)C	-2.77662	13.0555
Isobavachalcone	Anti-infection	Microbiology	Isobavachalcone, a naturally occurring chalcone compound derived from the seeds of Psoralea corylifolia L., has long been used in traditional Chinese medicine as anthelmintic, antibacterial, aphrodisiac, astringent and antiplatelet agent.	324.37	20784-50-3	C20H20O4	CC(C)=CCC1=C(O)C(=CC=C1O)C(=O)\C=C\C2=CC=C(O)C=C2	32.3757	16.0069
WAY-321364	casein kinase 2	Metabolism	altering the lifespan of a eukaryotic organism; casein kinase 2 inhibitors;	375.377	385389-39-9	C21H17N3O4	CC1=C(OCC(=O)NC2=CC=C(C=C2)C3=NN=C(O3)C4=CC=CO4)C=CC=C1	14.2408	6.46034
WAY-620147	kinase	Metabolism,apoptosis	monoamine oxidase a inhibitor; induces apoptosis; protein kinase inhibitor;	314.178	515866-67-8	C12H16BrN3O2	BrC1=CN=CC(=C1)C(=O)NCCN2CCOCC2	8.2318	-6.38681
WAY-652509	quinone reductase 2,Casein kinase 1δ	Metabolism	inhibitors of quinone reductase 2; Casein kinase 1δ inhibitors;	269.729	854355-54-7	C15H12ClN3	ClC1=CC2=C(C=C1)C(=CC=N2)NCC3=CC=CC=N3	16.5875	11.384
GSK1838705A	ALK,IGF-1R	Protein Tyrosine Kinase	GSK1838705A is a potent IGF-1R inhibitor with IC50 of 2.0 nM, modestly potent to IR and ALK with IC50 of 1.6 nM and 0.5 nM, respectively, and little activity to other protein kinases.	532.57	1116235-97-2	C27H29FN8O3	CNC(=O)C1=C(F)C=CC=C1NC2=C3C=C[NH]C3=NC(=N2)NC4=C(OC)C=C5CCN(C(=O)CN(C)C)C5=C4	22.1069	18.6577
ONO-4059 analogue	BTK	Angiogenesis	ONO-4059 analogue is an analogue of ONO-4059, which is a highly potent and selective oral BTK inhibitor with IC50 of 23.9 nM. Phase 1.	456.5	1351635-67-0	C25H24N6O3	NC1=C2N(C(=O)N(C3CCCN(C3)C(=O)C=C)C2=NC=N1)C4=CC=C(OC5=CC=CC=C5)C=C4	9.36614	7.84327
Necrosulfonamide	Others	Others	Necrosulfonamide is a very specific and potent necrosis inhibitor and blocks mixed lineage kinase domain-like protein (MLKL).	461.47	1360614-48-7	C18H15N5O6S2	COC1=C(N[S](=O)(=O)C2=CC=C(NC(=O)\C=C\C3=CC=C(S3)[N+]([O-])=O)C=C2)N=CC=N1	27.0322	16.3524
WAY-320774	Mycobacterium tuberculosis shikimate kinase	others	Inhibitors of the Kanamycin Resistance Enzyme Eis from Mycobacterium tuberculosis; Mycobacterium tuberculosis shikimate kinase inhibitors;	364.421	425653-38-9	C19H16N4O2S	OC(=O)CSC1=NC2=C(N=N1)C3=C(C=CC=C3)[N]2CCC4=CC=CC=C4	15.4125	13.9084
WAY-652435	P2Y12,tankyrase,Aurora Kinase	Microbiology, Cell Cycle,Epigenetics	P2Y12 antagonist; tankyrase inhibitor; P2Y12 antagonist; Inhibitor of Aurora Kinases; antibacterial agent;	181.235	173850-51-6	C9H15N3O	CC1=CC(=NO1)CN2CCNCC2	-9.87778	15.2506
RepSox	TGF-beta/Smad	TGF-beta/Smad	RepSox is a potent and selective inhibitor of the TGFβR-1/ALK5 with IC50 of 23 nM and 4 nM for ATP binding to ALK5 and ALK5 autophosphorylation in cell-free assays, respectively.	287.32	446859-33-2	C17H13N5	CC1=CC=CC(=N1)C2=N[NH]C=C2C3=CC=C4N=CC=CC4=N3	39.9594	20.8335
WAY-235142	MtSk	others	MtSk inhibitors	266.338	380550-28-7	C17H18N2O	CC(O)C1=NC2=CC=CC=C2[N]1CCC3=CC=CC=C3	11.5885	11.0383
Glumetinib	c-Met	Protein Tyrosine Kinase	Glumetinib (SCC244) is a potent and highly selective c-Met inhibitor with an IC50 of 0.42 ± 0.02 nmol/L. Glumetinib has greater than 2,400-fold selectivity for c-Met over those 312 kinases evaluated, including the c-Met family member RON and highly homologous kinases Axl, Mer, and TyrO3.	459.48	1642581-63-2	C21H17N9O2S_x000D_	C[N]1C=C(C=N1)C2=C[N]3C(=NC=C3[S](=O)(=O)[N]4N=CC5=NC=C(C=C45)C6=C[N](C)N=C6)C=C2	54.923	23.3887
Sunitinib Malate	c-Kit,PDGFR,VEGFR	Protein Tyrosine Kinase	Sunitinib Malate is a multi-targeted RTK inhibitor targeting VEGFR2 (Flk-1) and PDGFRβ with IC50 of 80 nM and 2 nM in cell-free assays, and also inhibits c-Kit.	532.56	341031-54-7	C26H33FN4O7	CCN(CC)CCNC(=O)C1=C(C)[NH]C(=C1C)/C=C/2C(=O)NC3=CC=C(F)C=C23.OC(CC(O)=O)C(O)=O	34.0594	4.76709
Ensartinib (X-396) dihydrochloride	ALK	Angiogenesis	Ensartinib (X-396) is a potent new-generation <b>ALK</b> inhibitor with high activity against a broad range of known crizotinib-resistant ALK mutations and CNS metastases. It potently inhibits both wild-type ALK and ALK variants (F1174, C1156Y, L1196M, S1206R, T1151, and G1202R mutants) with in vitro IC50s of <4 nM.	634.36	2137030-98-7	C26H29Cl4FN6O3_x000D_	Cl.Cl.CC1CN(CC(C)N1)C(=O)C2=CC=C(NC(=O)C3=NN=C(N)C(=C3)OC(C)C4=C(Cl)C(=CC=C4Cl)F)C=C2	42.8529	27.4954
WAY-311677	FAK	cancer	novel anticancer agents (potential antiproliferation and FAK inhibitors)	295.359	19948-85-7	C16H13N3OS	CC1=CC=C(C=C1)C2=NN=C(NC(=O)C3=CC=CC=C3)S2	10.0794	9.66183
Ilaprazole	Proton Pump	Transmembrane Transporters	Ilaprazole is a new proton pump inhibitor (PPI) used in the treatment of dyspepsia, peptic ulcer disease (PUD), gastroesophageal reflux disease (GORD/GERD) and duodenal ulcer. It inhibits H+/K+-ATPase with an IC50 of 6.0 μM.	366.44	172152-36-2	C19H18N4O2S	COC1=CC=NC(=C1C)C[S](=O)C2=NC3=C([NH]2)C=C(C=C3)[N]4C=CC=C4	20.3835	23.0325
VU6015929	DDR	Protein Tyrosine Kinase	VU6015929 is a selective Discoidin Domain Receptor 1/2 (DDR1/2) inhibitor with IC50 of 4.67 nM and 7.39 nM for DDR1 and DDR2, respectively. VU6015929 potently inhibits collagen-IV production.	485.43	No CAS	C24H19F4N5O2_x000D_	C[N]1C=CC(=N1)C2=CN=CC(=C2)CNC3=C(F)C=CC(=C3)C(=O)NC4=CC(=CC=C4)OC(F)(F)F	40.3471	17.0413
Sulfatinib	CSF-1R	Protein Tyrosine Kinase	Sulfatinib is a potent and highly selective <b>tyrosine kinase</b> inhibitor against <b>VEGFR1</b>, <b>VEGFR2</b>, <b>VEGFR3</b>, <b>FGFR1</b> and <b>CSF1R</b> with IC50 of 2 nM, 24 nM, 1 nM, 15 nM and 4 nM, respectively. Sulfatinib shows encouraging antitumor activity and manageable toxicities in patients with advanced NETs.	480.58	1308672-74-3	C24H28N6O3S_x000D_	CN(C)CCN[S](=O)(=O)CC1=CC(=CC=C1)NC2=NC=CC(=N2)OC3=CC4=C([NH]C(=C4)C)C=C3	7.73372	23.2731
WAY-270252	IGF-1R,SRC	Protein Tyrosine Kinase	IGF-1R/SRC inhibitor	312.75	61-38-1	C17H13ClN2O2	ClC1=CC=C(CNC(=O)C(=O)C2=C[NH]C3=C2C=CC=C3)C=C1	3.91712	2.76115
DTP3	JNK	MAPK	DTP3 is a selective GADD45β/MKK7 inhibitor, which inhibits cancer-selective NF-κB survival pathway.	525.6	1809784-29-9	C26H35N7O5	CC(=O)NC(CC1=CC=C(O)C=C1)C(=O)NC(CCCNC(N)=N)C(=O)NC(CC2=CC=CC=C2)C(N)=O	1.05501	19.2131
PD168393	EGFR	Protein Tyrosine Kinase	PD168393 is an irreversible EGFR inhibitor with IC50 of 0.70 nM, irreversibly alkylate Cys-773 inactive against insulin, PDGFR, FGFR and PKC.	369.22	194423-15-9	C17H13BrN4O	BrC1=CC(=CC=C1)NC2=NC=NC3=CC=C(NC(=O)C=C)C=C23	20.529	8.72417
WAY-117443	GRK6,DOPA decarboxylase	others	GRK6 inhibitor; DOPA decarboxylase inhibitors;	326.343	1164562-43-9	C19H18O5	CCOC1=CC(=CC(=O)C2=C(C)OC(=C12)C)C3=CC(=C(O)C=C3)O	15.3699	-6.91641
WAY-326892	kinase	Others	kinase inhibitory activity	375.465	685865-72-9	C17H17N3O3S2	CCC1=C(NC(=O)CC[S](=O)(=O)C2=CC=CC3=NSN=C23)C=CC=C1	15.5364	-2.7261
AS2863619	CDK	Cell Cycle	AS2863619 is a small-molecule <b>cyclin-dependent kinase CDK8/19</b> inhibitor with IC50 of 0.6099 nM and 4.277 nM, respectively. AS2863619 is a potent <b>Foxp3</b> inducer in T<sub>conv</sub> cells.	405.24	2241300-51-4	C16H14Cl2N8O_x000D_	Cl.Cl.CC1=NC2=C([NH]1)C=CC(=C2)[N]3C4=C(C=NC=C4)N=C3C5=NON=C5N	23.7216	43.4081
Carbazochrome	Others	Others	Carbazochrome is a hemostatic agent that causes the aggregation and adhesion of platelets in the blood to form a platelet plug, ceasing blood flow from an open wound.	236.23	69-81-8	C10H12N4O3	CN1CC(O)C2=C\C(=N\NC(N)=O)C(=O)C=C12	9.75455	9.59194
WAY-312484	EGFR	others	EGFR inhibitor	255.275	91769-08-3	C13H13N5O	COC1=CC=C(NC2=CC(=NC3=NC=N[N]23)C)C=C1	-1.1872	13.9119
WAY-298129	CLK1,DYRK,CLK,CK1,RB,kinase,ENT1,CK1,DYRK1A,PKD1,CLK,C1ks	Cell Cycle	inhibitor of CLK1	249.329	719277-26-6	C13H15NO2S	CCN1/C(SC2=CC=C(OC)C=C12)=C/C(C)=O	-3.56827	10.928
WAY-647802	EGFR,CDK4 and 6	Protein Tyrosine Kinase , Angiogenesis , JAK/STAT,Cell Cycle,Wnt	EGFR or/and ALK inhibitors; antiproliferative agents; CDK4 and 6 inhibitors ; Wnt signaling modulators; protein kinase inhibitors;	250.254	852225-20-8	C11H14N4O3	CC(=O)N1CCN(CC1)C2=CN=C(C=C2)[N+]([O-])=O	0.0533573	7.34824
WAY-349290	Pim,MCH receptor	JAK/STAT,Epigenetics	inhibit the activity of Pim kinases; MCH receptor antagonists; fungicides;	262.715	215928-66-8	C12H7ClN2OS	ClC1=CC=C(C=C1)C2=CC3=C(S2)C(=O)NC=N3	49.5663	9.9227
7-Nitroindazole	neuronal nitric oxide synthase	Nervous system	Nitroindazole acts as a selective inhibitor for neuronal nitric oxide synthase, a hemoprotein enzyme that, in neuronal tissue, converts arginine to citrulline and nitric oxide (NO)	163.13	2942-42-9	C7H5N3O2	[O-][N+](=O)C1=CC=CC2=C1[NH]N=C2	-3.75726	8.32114
WAY-305025	Mnk	MAPK	selective Mnk inhibitors	224.236	457911-10-3	C9H8N2O3S	COC(=O)C1=C(C)C2=C(S1)N=CNC2=O	7.83353	-5.76924
WAY-310410	LIMK1	others	LIMK1 inhibitors; LIMK1 inhibitors.	265.398	332904-10-6	C12H15N3S2	CSC1=NC2=C(C(=N1)N)C3=C(CCCCC3)S2	-5.58918	15.7091
Bortezomib (PS-341)	Proteasome	Proteases	Bortezomib (PS-341) is a potent 20S proteasome inhibitor with Ki of 0.6 nM. It exhibits favorable selectivity towards tumor cells over normal cells.	384.24	179324-69-7	C19H25BN4O4	CC(C)CC(NC(=O)C(CC1=CC=CC=C1)NC(=O)C2=NC=CN=C2)B(O)O	11.9506	11.9789
Spebrutinib (CC-292, AVL-292)	BTK	Angiogenesis	Spebrutinib (CC-292, AVL-292) is a covalent, orally active, and highly selective BTK inhibitor with IC50 of <0.5 nM, displaying at least 1400-fold selectivity over the other kinases assayed. Phase 1.	423.44	1202757-89-8	C22H22FN5O3	COCCOC1=CC=C(NC2=NC=C(F)C(=N2)NC3=CC(=CC=C3)NC(=O)C=C)C=C1	6.02455	6.97137
AZD2932	PDGFR,VEGFR,FLT3,c-Kit	Protein Tyrosine Kinase	AZD2932 is a potent and mutil-targeted protein tyrosine kinase inhibitor with IC50 of 8 nM, 4 nM, 7 nM, and 9 nM for VEGFR-2, PDGFRβ, Flt-3, and c-Kit, respectively.	447.49	883986-34-3	C24H25N5O4	COC1=C(OC)C=C2C(=NC=NC2=C1)OC3=CC=C(CC(=O)NC4=C[N](N=C4)C(C)C)C=C3	41.1134	19.3027
Alectinib hydrochloride	ALK	Protein Tyrosine Kinase	Alectinib is a second generation oral drug that selectively inhibits the activity of anaplastic lymphoma kinase (ALK) tyrosine kinase.	519.08	1256589-74-8	C30H35ClN4O2	Cl.CCC1=C(C=C2C(=C1)C(=O)C3=C([NH]C4=C3C=CC(=C4)C#N)C2(C)C)N5CCC(CC5)N6CCOCC6	-20.1456	-17.0043
WAY-303290	p56lck SH2 domain	tyrosine kinase	nhibit the pY binding site of tyrosine kinase p56lck SH2 domain	302.779	323176-64-3	C15H11ClN2OS	ClC1=C(SC2=C1C=CC=C2)C(=O)NCC3=CN=CC=C3	9.4196	2.64283
WAY-329689	Abl	Angiogenesis	ABL kinase inhibiting activities	483.558	943934-76-7	C29H29N3O4	COCCN1C(C(C(=O)NC2=C(OC)C=CC(=C2)C)C3=CC=CC=C3C1=O)C4=C[NH]C5=C4C=CC=C5	-14.8017	34.5057
WAY-351783	creatin kinase	others	creatin kinase inhibitors	444.934	460994-47-2	C21H21ClN4O3S	ClC1=C(C=CC(=C1)NC(=O)CN2CCN(CC2)[S](=O)(=O)/C=C/C3=CC=CC=C3)C#N	44.246	28.221
VX-702	p38 MAPK	MAPK	VX-702 is a highly selective inhibitor of p38α MAPK, 14-fold higher potency against the p38α versus p38β. Phase 2.	404.3	745833-23-2	C19H12F4N4O2	NC(=O)N(C1=NC(=C(C=C1)C(N)=O)C2=C(F)C=C(F)C=C2)C3=C(F)C=CC=C3F	42.5634	34.0263
SB202190 (FHPI)	p38 MAPK	MAPK	SB202190 (FHPI) is a potent p38 MAPK inhibitor targeting p38α/β with IC50 of 50 nM/100 nM in cell-free assays, sometimes used instead of SB 203580 to investigate potential roles for SAPK2a/p38 in vivo.	331.34	152121-30-7	C20H14FN3O	OC1=CC=C(C=C1)C2=NC(=C([NH]2)C3=CC=NC=C3)C4=CC=C(F)C=C4	25.7929	2.4871
TAK-901	Aurora Kinase	Cell Cycle	TAK-901 is a novel inhibitor of Aurora A/B with IC50 of 21 nM/15 nM. It is not a potent inhibitor of cellular JAK2, c-Src or Abl. Phase 1.	504.64	934541-31-8	C28H32N4O3S	CC[S](=O)(=O)C1=CC=CC(=C1)C2=CC(=C(C)C3=C2C4=C([NH]3)N=CC(=C4)C)C(=O)NC5CCN(C)CC5	15.6635	0.485612
WAY-612622	CDK	Cell Cycle	CDK9 Inhibitors	282.269	288401-60-5	C16H11FN2O2	OC1=C(C=C(F)C=C1)C(=O)C2=C[N](N=C2)C3=CC=CC=C3	-5.20963	8.08326
BIBF-0775	TGF-beta/Smad	TGF-beta/Smad	BIBF-0775 is a selective inhibitor of <b>transforming growth factor β Receptor I (TGFβRI,Alk5)</b> with an IC50 of 34nM.	494.63	334951-90-5	C31H34N4O2_x000D_	CCN(C)C(=O)C1=CC2=C(C=C1)\C(C(=O)N2)=C(\NC3=CC=C(CN4CCCCC4)C=C3)C5=CC=CC=C5	21.4014	3.0774
Tanshinone IIA	Lipase	Metabolism	Tanshinone IIA(Tanshinone B) is the most abundant diterpene quinone in Danshen, Salviae miltiorrhizae Radix, a widely prescribed traditional herbal medicine that is used to treat cardiovascular and inflammatory diseases A natural monoacylglycerol lipase inhibitor.	294.34	568-72-9	C19H18O3	CC1=COC2=C1C(=O)C(=O)C3=C2C=CC4=C3CCCC4(C)C	40.6692	4.84649
WAY-632021	TIE-2,Raf,phosphodiesterase V	Protein Tyrosine Kinase,MAPK	TIE-2 and Raf kinase inhibitor; phosphodiesterase V inhibitor;	275.757	742094-64-0	C13H10ClN3S	CC1=C(C)C2=C(S1)N=C(N=C2Cl)C3=CN=CC=C3	3.49867	7.68426
TAK-632	Raf	MAPK	TAK-632 is a potent pan-Raf inhibitor with IC50 of 8.3 nM and 1.4 nM for B-Raf(wt) and C-Raf in cell-free assays, respectively, showing less or no inhibition against other tested kinases.	554.52	1228591-30-7	C27H18F4N4O3S	FC1=C(NC(=O)CC2=CC=CC(=C2)C(F)(F)F)C=C(OC3=C(C#N)C4=C(C=C3)N=C(NC(=O)C5CC5)S4)C=C1	38.9019	-6.62684
ETC-206 (AUM 001)	MNK	MAPK	ETC-206 is an orally available highly selective small-molecule <b>MNK 1/2</b> inhibitor with IC50s of 64 nM and 86 nM, respectively.	408.45	1464151-33-4	C25H20N4O2_x000D_	O=C(N1CCOCC1)C2=CC=C(C=C2)C3=C[N]4C(=NC=C4C5=CC=C(C=C5)C#N)C=C3	10.6648	10.8513
WAY-300063	Tropomyosin-Related Kinase A,ATP-binding cassette transporters	others	Inhibitors of Tropomyosin-Related Kinase A	295.293	296888-45-4	C16H13N3O3	CC1=CC(=C(O)C=C1)C2=N[NH]C(=C2)C3=CC=CC=C3[N+]([O-])=O	7.89694	-3.13249
AZD5363	Akt	PI3K/Akt/mTOR	AZD5363 potently inhibits all isoforms of Akt(Akt1/Akt2/Akt3) with IC50 of 3 nM/8 nM/8 nM in cell-free assays, similar to P70S6K/PKA and lower activity towards ROCK1/2. Phase 2.	428.92	1143532-39-1	C21H25ClN6O2	NC1(CCN(CC1)C2=NC=NC3=C2C=C[NH]3)C(=O)NC(CCO)C4=CC=C(Cl)C=C4	67.7861	39.3069
UK-371804 HCl	Serine Protease	Proteases	UK-371804 is a potent and selective urokinase-type plasmogen activator (uPA) inhibitor with excellent enzyme potency (Ki=10 nM) and selectivity profile (4000-fold versus tPA and 2700-fold versus plasmin).	422.29	256476-36-5	C14H17Cl2N5O4S	Cl.CC(C)(N[S](=O)(=O)C1=CC2=C(C=C1)C(=CN=C2NC(N)=N)Cl)C(O)=O	48.4641	21.4847
Lucitanib (E3810) hydrochloride	VEGFR	Protein Tyrosine Kinase	Lucitanib (E-3810, AL3810) hydrochloride is a dual inhibitor of Vascular endothelial growth factor receptor (VEGFR) and Fibroblast growth factor receptor (FGFR). Lucitanib hydrochloride (E-3810, AL3810) potently and selectively inhibits VEGFR1, VEGFR2, VEGFR3, FGFR1 and FGFR2 with IC50 of 7 nM, 25 nM, 10 nM, 17.5 nM, and 82.5 nM, respectively.	479.96	1058137-23-7	C26H26ClN3O4_x000D_	[Cl-].CNC(=O)C1=CC=CC2=C1C=CC(=C2)OC3=CC=NC4=CC(=C(OC)C=C34)OCC5([NH3+])CC5	22.5343	-10.6012
WAY-298630	PDK1	PI3K/Akt/mTOR	PDK1 modulator; altering the lifespan of a eukaryotic organism;	346.376	303134-93-2	C17H15FN2O3S	OC(=O)C[N]1C(=NC2=C1C=CC=C2)SCCOC3=CC=CC=C3F	11.0169	4.8457
Amcasertib (BBI503)	Stemness kinase	Stem Cells & Wnt	Amcasertib (BBI503), a first-in-class cancer stemness kinase inhibitor, is claimed to inhibit Nanog and other CSC pathways by targeting kinases with potential anticancer activity.	539.69	1129403-56-0	C31H33N5O2S	CCN(CC)CCNC(=O)C1=C(C)[NH]C(=C1C)\C=C/2C(=O)NC3=CC=C(C=C23)C4=CSC(=N4)C5=CC=CC=C5	46.4136	10.718
KX1-004	Src	Protein Tyrosine Kinase	KX1-004 is a non-ATP competitive inhibitor of Src protein tyrosine kinase (Src-PTK; IC50 = 40 µM).	284.29	518058-84-9	C16H13FN2O2_x000D_	OC1=CC(=CC=C1)CNC(=O)C2=CC3=C([NH]2)C=CC(=C3)F	24.5034	15.9387
WAY-272589	pin1	others	Pin1 ligands; Mycobacterium tuberculosis shikimate kinase inhibitors;	345.439	637325-53-2	C16H15N3O2S2	CC1=C(C)C(=CC=C1)[N]2C(=NN=C2C3=CC=CS3)SCC(O)=O	-2.25568	28.085
WAY-320706	Mycobacterium tuberculosis shikimate kinase , ATOH-1	Microbiology	Mycobacterium tuberculosis shikimate kinase inhibitors; p27kip1 transcriptional modulators; enhance ATOH-1 expression;	366.849	370092-42-5	C13H11ClN6OS2	CC1=C(Cl)C=C(C=C1)[N]2N=NN=C2SCC(=O)NC3=NC=CS3	10.4275	3.99995
Oroxin B	Others	Cancer	Oroxin B has antioxidant activity.	594.518	114482-86-9	C27H30O15	OCC1OC(OCC2OC(OC3=C(O)C(=C4C(=O)C=C(OC4=C3)C5=CC=CC=C5)O)C(O)C(O)C2O)C(O)C(O)C1O	18.1471	-2.48991
WAY-299017	PI3Ka	PI3K/Akt/mTOR	selective inhibitors of mutant H1047R phosphoinositide- 3-kinase (PI3Ka)	294.305	300803-79-6	C17H14N2O3	OC1=C(C(=O)NCC2=CC=CC=C2)C(=O)NC3=C1C=CC=C3	0.415	10.8602
WAY-631127	Casein kinase 1δ	Metabolism	Casein kinase 1δ inhibitor	431.871	756849-12-4	C24H18ClN3O3	ClC1=C(C=CC=C1)\C=C(C(=O)NCC2=CC3=C(OCO3)C=C2)/C4=NC5=C([NH]4)C=CC=C5	-12.5044	-2.57816
RXDX-106 (CEP-40783)	TAM Receptor	Protein Tyrosine Kinase	RXDX-106 (CEP-40783) is an orally-available, potent and selective TAM(TYRO3, AXL, MER)/MET inhibitor displaying low nanomolar biochemical activity and slow (T1/2 >120 min) inhibitor off-rate in peptide phosphorylation assays and in vitro kinase binding assays, respectively.	588.56	1437321-24-8	C31H26F2N4O6	COC1=CC2=C(C=C1OC)C(=CC=N2)OC3=C(F)C=C(NC(=O)C4=CN(C(C)C)C(=O)N(C4=O)C5=CC=C(F)C=C5)C=C3	35.4881	9.36861
WAY-634931	GSK3,ROR gamma,CETP,metabotropic glutamate receptor,PAR-1,Neuropeptide Y Y5 Receptor,PI3K	PI3K/Akt/mTOR,Stem Cells,Wnt	inhibitors of GSK3 kinases; ROR gamma modulators; GSK3 inhibitors; CETP inhibitors; metabotropic glutamate receptor modulators; PAR-1 inhibitors; inhibitors of phosphoinositide 3-kinase; Neuropeptide Y Y5 Receptor Antagonist; PI3K inhibitors; antagonists of metabotropic glutamate receptors; antagonists of metabotropic glutamate receptors;	166.217	82683-51-0	C10H14O2	O=C1CC(=O)CC2(CCCC2)C1	-2.73754	4.54526
Ferulic acid methyl ester	Immunology & Inflammation related	Immunology & Inflammation	Methyl ferulate is a lipophilic derivative of ferulic acid, which is a hydroxycinnamic acid that is abundant in plants. It shows the strongest antioxidant activity and can protect against inflammation and cancer.	208.21	2309-07-1	C11H12O4	COC(=O)\C=C\C1=CC=C(O)C(=C1)OC	8.91998	7.45691
WAY-330162	Kinase	others	kinase inhibitory activity	430.517	868963-46-6	C22H26N2O5S	COC1=CC=CC(=C1)CNC(=O)CC[S](=O)(=O)C2=CC3=C(C=C2)N(C(C)C3)C(C)=O	-9.51738	31.7219
Casticin	TGFβ1	Others	An anticancer flavonol; decreases proliferation in K562, HL-60, and Kasumi-1 leukemia cells lines (IC50s = 5.95, 4.82, and 15.56 µM, respectively); blocks TGF-β/SMAD signaling in LX2 cells; decreases TGF-β1 mRNA and p-SMAD levels in a mouse model of liver	374.341	479-91-4	C19H18O8	COC1=C(O)C=C(C=C1)C2=C(OC)C(=O)C3=C(O2)C=C(OC)C(=C3O)OC	6.67498	5.71271
AUDA	Epoxide Hydrolase, p38	Metabolism	AUDA (compound 43) is a potent inhibitor of soluble epoxide hydrolase (sEH) with IC50 of 18 nM and 69 nM for the mouse sEH and human sEH, respectively. AUDA has anti-inflammatory activity that reduces the protein expression of MMP-9, IL-1β, TNF-α and TGF-β. AUDA downregulates Smad3 and p38 signaling pathways.	392.58	479413-70-2	C23H40N2O3_x000D_	OC(=O)CCCCCCCCCCCNC(=O)NC12CC3CC(CC(C3)C1)C2	4.96738	-16.105
ARS-853 (ARS853)	Rho	Cell Cycle	ARS-853 is a selective, covalent KRAS(G12C) inhibitor that inhibits mutant KRAS-driven signaling by binding to the GDP-bound oncoprotein and preventing activation.	432.94	1629268-00-3	C22H29ClN4O3	CC1(CC1)C2=C(Cl)C=C(O)C(=C2)NCC(=O)N3CCN(CC3)C4CN(C4)C(=O)C=C	15.9584	-1.76402
Bay 11-7085	IκB/IKK	NF-κB	BAY 11-7085 is an irreversible inhibitor of TNFα-induced IκBα phosphorylation with IC50 of 10 μM.	249.33	196309-76-9	C13H15NO2S	CC(C)(C)C1=CC=C(C=C1)[S](=O)(=O)\C=C\C#N	16.1352	16.9263
TG-89	JAK	JAK/STAT	TG-89 is a <b>JAK</b> inhibitor that inhibits <b>JAK2</b>, <b>FLT3</b>, <b>RET</b> and <b>JAK3</b>.	510.65	936091-56-4	C26H34N6O3S_x000D_	CC1=CN=C(NC2=CC=CC(=C2)CN3CCOCC3)N=C1NC4=CC(=CC=C4)[S](=O)(=O)NC(C)(C)C	5.94162	1.97516
Erucic acid	Others	Others	Erucic acid is a monounsaturated omega-9 fatty acid used as mineral oil and a precursor to biodiesel fuel.	338.57	112-86-7	C22H42O2	CCCCCCCC\C=C/CCCCCCCCCCCC(O)=O	-2.89375	12.0448
WAY-324418	Mycobacterium tuberculosis shikimate kinase	Microbiology	Mycobacterium tuberculosis shikimate kinase (MtSk) inhibitor	262.288	681838-49-3	C11H10N4O2S	C[N]1C2=C(C=CC=C2)[N]3C(=NN=C13)SCC(O)=O	-3.24044	23.7842
WAY-632963	Aurora kinase A	Cell Cycle & Epigenetics	Aurora kinase A inhibitor	237.685	900640-73-5	C11H12ClN3O	CCNCC1=NC2=C(C=CC(=C2)Cl)C(=O)N1	-3.1181	-11.3673
RKI-1447	ROCK	Cell Cycle	RKI-1447 is a potent inhibitor of ROCK1 and ROCK2, with IC50 of 14.5 nM and 6.2 nM, respectively, has anti-invasive and antitumor activities.	326.37	1342278-01-6	C16H14N4O2S	OC1=CC(=CC=C1)CNC(=O)NC2=NC(=CS2)C3=CC=NC=C3	15.6215	12.4375
KU-60019	ATM/ATR	DNA Damage	KU-60019 is an improved analogue of KU-55933, with IC50 of 6.3 nM for ATM in cell-free assays, 270- and 1600-fold more selective for ATM than DNA-PK and ATR,and is a highly effective radiosensitizer.	547.67	925701-49-1	C30H33N3O5S	CC1CN(CC(C)O1)CC(=O)NC2=CC3=C(SC4=C(C3)C=CC=C4C5=CC(=O)C=C(O5)N6CCOCC6)C=C2	43.6024	5.15341
Daphnoretin	PKC	TGF-beta/Smad	Daphnoretin (Dephnoretin, Thymelol), a biologically active compound isolated from Wikstroemia indica C.A. Mey., is a protein kinase C (PKC) activator. Daphnoretin inhibits the proliferation, invasion, and migration of tumor cells and promote its apoptosis by regulating the activity of Akt signal pathway.	352.29	2034-69-7	C19H12O7_x000D_	COC1=C(O)C=C2OC(=O)C(=CC2=C1)OC3=CC4=C(C=CC(=O)O4)C=C3	14.5712	22.5442
Amiloride HCl	Sodium Channel,Calcium Channel	Transmembrane Transporters	Amiloride is a selective T-type calcium channel blocker, an epithelial sodium channel blocker and a selective inhibitor of urokinase plasminogen activator (uPA)(Ki=7 μM).	266.09	2016-88-8	C6H9Cl2N7O	Cl.NC(=N)NC(=O)C1=NC(=C(N)N=C1N)Cl	16.6266	0.178005
WAY-326578	GSK-3b	PI3K/Akt/mTOR & Stem Cells & Wnt	GSK-3b inhibition	316.375	870984-34-2	C16H16N2O3S	COCCNC(=O)C1=CC2=C(S1)C3=CC(=CC=C3NC2=O)C	-6.7133	32.8094
Malachite green	Others	Others	Malachite green is a synthetic dyestuff and antimicrobial with potential carcinogenicity.	927	2437-29-8	C52H54N4O12_x000D_	CN(C)C1=CC=C(C=C1)C(C2=CC=CC=C2)=C3C=CC(C=C3)=[N+](C)C.CN(C)C4=CC=C(C=C4)C(C5=CC=CC=C5)=C6C=CC(C=C6)=[N+](C)C.OC(=O)C(O)=O.OC(=O)C([O-])=O.OC(=O)C([O-])=O	28.7496	-14.7366
WAY-658341	Casein kinase 1d	Metabolism	Casein kinase 1d inhibitors	459.32	849012-74-4	C18H15BrN6O2S	CCOC1=C(C=CC=C1)[N]2N=NN=C2SCC3=NN=C(O3)C4=C(Br)C=CC=C4	12.579	11.4551
WAY-271146	VEGFR	Protein Tyrosine Kinase ,Angiogenesis	VEGFR inhibitor; angiogenesis inhibitor;	291.261	683235-33-8	C16H9N3O3	O=C(NC1=CC2=C(C=C1)C(=O)NC2=O)C3=CC=C(C=C3)C#N	-9.38129	23.4031
SKI-V	SPHK	Immunology & Inflammation	SKI V is a noncompetitive and potent inhibitor of non-lipid sphingosine kinase with IC50 of 2 μM for GST-hSK. SKI-V also inhibits PI3K with IC50 of 6 μM for hPI3k. SKI-V decreases formation of the mitogenic second messenger sphingosine-1-phosphate (S1P) and induces apoptosis with antitumor activity.	254.24	24418-86-8	C15H10O4_x000D_	OC1=C(O)C=C(C=C1)C=C2OC3=CC=CC=C3C2=O	13.7486	-4.13964
MS140	CDK	Cell Cycle	MS140 is a specific and highly potent CDK4/6 kinase inhibitor and also a CDK4/6 degrader (PROTAC).	760.8	2229974-83-6	C39H40N10O7_x000D_	CC(=O)C1=C(C)C2=C(N=C(NC3=NC=C(C=C3)N4CCN(CC4)C(=O)CNC5=CC=CC6=C5C(=O)N(C7CCC(=O)NC7=O)C6=O)N=C2)N(C8CCCC8)C1=O	19.7044	12.0692
Corynoxeine	ERK	MAPK	Corynoxeine, which could be isolated from Uncaria rhynchophylla, is a useful and prospective compound in the prevention and treatment for vascular diseases. It is a potent <b>ERK1/2</b> inhibitor of key PDGF-BB-induced VSMC proliferation.	382.45	630-94-4	C22H26N2O4_x000D_	CO\C=C(/C1CC2N(CCC23C(=O)NC4=CC=CC=C34)CC1C=C)C(=O)OC	18.2191	3.6547
Nintedanib (BIBF 1120)	FGFR,PDGFR,VEGFR	Protein Tyrosine Kinase	Nintedanib (BIBF 1120) is a potent triple angiokinase inhibitor for VEGFR1/2/3, FGFR1/2/3 and PDGFRα/β with IC50 of 34 nM/13 nM/13 nM, 69 nM/37 nM/108 nM and 59 nM/65 nM in cell-free assays. Phase 3.	539.62	656247-17-5	C31H33N5O4	COC(=O)C1=CC=C\2C(=C1)NC(=O)C2=C(NC3=CC=C(C=C3)N(C)C(=O)CN4CCN(C)CC4)/C5=CC=CC=C5	39.7193	-8.18582
Acarbose	Others	Others	Acarbose is an inhibitor of intestinal alpha-glucosidase, used to treat type 2 diabetes mellitus.	645.6	56180-94-0	C25H43NO18	CC1OC(OC2C(O)C(O)C(OC2CO)OC3C(O)C(O)C(O)OC3CO)C(O)C(O)C1NC4C=C(CO)C(O)C(O)C4O	11.0247	13.5089
WAY-313013	p38,histamine-3 (H3) receptor	MAPK	p38a Mitogen-Activated Protein Kinase Inhibitors; histamine-3 (H3) receptor ligands.	284.149	326898-76-4	C12H14BrNO2	BrC1=CC=C(C=C1)C(=O)NCC2CCCO2	12.2149	6.79203
WAY-273170	Myt1	others	Myt1 Kinase Inhibitors	396.85	478247-52-8	C19H13ClN4O2S	ClC1=CC=C(C=C1)C(=O)CSC2=NC3=C(C=N[N]3C4=CC=CC=C4)C(=O)N2	12.4611	22.4154
Dovitinib (TKI-258, CHIR-258)	c-Kit,FGFR,FLT3,PDGFR,VEGFR	Angiogenesis	Dovitinib (TKI258, CHIR258) is a multitargeted RTK inhibitor, mostly for class III (FLT3/c-Kit) with IC50 of 1 nM/2 nM, also potent to class IV (FGFR1/3) and class V (VEGFR1-4) RTKs with IC50 of 8-13 nM, less potent to InsR, EGFR, c-Met, EphA2, Tie2, IGF-1R and HER2 in cell-free assays. Phase 4.	392.43	405169-16-6	C21H21FN6O	CN1CCN(CC1)C2=CC3=C(C=C2)N=C([NH]3)C4=C(N)C5=C(NC4=O)C=CC=C5F	23.7672	-7.01795
ISCK03	c-Kit	Protein Tyrosine Kinase	ISCK03 is a cell-permeable inhibitor of <b>stem-cell factor (SCF)/c-kit</b> signaling.ISCK03 inhibits SCF-induced c-c-kit phosphorylation and downstream ERK phosphorylation.	355.45	945526-43-2	C19H21N3O2S	CC(C)(C)C1=CC=C(C=C1)[S](=O)(=O)NC2=CC=C(C=C2)[N]3C=CN=C3	43.626	26.6257
WAY-326542	CDK5/p25	Cell Cycle	altering the lifespan of a eukaryotic organism; CDK5/p25 inhibitor;	301.36	870983-04-3	C16H15NO3S	CN1C(C(C(O)=O)C2=CC=CC=C2C1=O)C3=C(C)C=CS3	-5.8076	29.3013
SB239063	p38 MAPK	MAPK	SB239063 is a potent and selective p38 MAPKα/β inhibitor with IC50 of 44 nM, showing no activity against the γ- and δ-kinase isoforms.	368.4	193551-21-2	C20H21FN4O2	COC1=NC=CC(=N1)C2=C(N=C[N]2C3CCC(O)CC3)C4=CC=C(F)C=C4	-21.1875	31.8903
GSK3179106	c-RET	Apoptosis	GSK3179106 is a potent, selective, and gut-restricted pyridone hinge binder small molecule <b>RET kinase</b> inhibitor with a RET IC50 of 0.3 nM and is efficacious in vivo.	467.41	1627856-64-7	C22H21F4N3O4_x000D_	CCOC1=CC(=O)NC=C1C2=CC=C(CC(=O)NC3=NOC(=C3)C(C)(C)C(F)(F)F)C(=C2)F	53.8179	23.5108
WAY-312187	Pim-1	kinase	Pim-1 kinase inhibitors	283.279	1609385-99-0	C16H13NO4	OC1(CC(=O)\C=C\C2=CC=CO2)C(=O)NC3=C1C=CC=C3	10.1003	21.5297
Sauchinone	HO-1	antiangiogenic	A lignan that has numerous effects on isolated cells and cardioprotective effects in vivo	356.369	177931-17-8	C20H20O6	CC1CC2C3C(C1C)C4=C(OC35OCOC5=CC2=O)C=C6OCOC6=C4	24.4339	32.3314
G-749	FLT3	Angiogenesis	G-749 is a novel and potent FLT3 inhibitor with IC50 of 0.4 nM, 0.6 nM and 1 nM for FLT3 (WT), FLT3 (D835Y), and Mer, respectively, showing lower potency against other tyrosine kinases.	521.41	1457983-28-6	C25H25BrN6O2	CN1CCC(CC1)NC2=NC3=C(C(=O)NC=C3Br)C(=N2)NC4=CC=C(OC5=CC=CC=C5)C=C4	41.2112	44.2123
GI-568769	p90 Ribosomal S6 Protein Kinase 2	kinase	Inhibitors for p90 Ribosomal S6 Protein Kinase 2	258.706	62001-32-5	C13H11ClN4	ClC1=CC=C(NC[N]2N=NC3=C2C=CC=C3)C=C1	-0.0833709	16.3294
WAY-297848	glucokinase	metabolism	glucokinase activators	296.773	404360-27-6	C13H13ClN2O2S	CC(C)(OC1=CC=C(Cl)C=C1)C(=O)NC2=NC=CS2	12.3276	7.20971
WAY-630308	Casein kinase 1δ	Metabolism	Casein kinase 1δ inhibitors; Casein kinase 1δ inhibitors;	303.356	326034-30-4	C16H21N3O3	COC1=C(OC)C(=CC(=C1)C2=NN=C3CCCCC[N]23)OC	3.23963	-15.3601
AG-490 (Tyrphostin B42)	EGFR	Protein Tyrosine Kinase	AG-490 (Tyrphostin B42) is an inhibitor of EGFR with IC50 of 0.1 μM in cell-free assays, 135-fold more selective for EGFR versus ErbB2, also inhibits JAK2 with no activity to Lck, Lyn, Btk, Syk and Src.	294.3	133550-30-8	C17H14N2O3	OC1=C(O)C=C(C=C1)\C=C(C#N)\C(=O)NCC2=CC=CC=C2	19.6283	-16.0214
WAY-350471	IRAK	Immunology & Inflammation	IRAK inhibitors	290.384	785705-53-5	C14H18N4OS	CC1=C(C)C2=C(S1)N=CN=C2N3CCC(CC3)C(N)=O	24.27	10.8753
WAY-270599	FGFR1,TNFa	Protein Tyrosine Kinase	FGFR1 inhibitor; TNFa inhibitor;	374.798	397281-20-8	C17H11ClN2O4S	OC1=C(Cl)C=C(N[S](=O)(=O)C2=CC=C3NC(=O)C4=CC=CC2=C34)C=C1	13.5127	-3.94656
WAY-352098	PDK1,CRTH2	PI3K/Akt/mTOR ,Endocrinology & Hormones	Modulators of the Protein Kinase PDK1; CRTH2 antagonists; CRTH2 antagonists; CRTH2 antagonists; altering the lifespan of eukaryotic organisms;	407.37	482643-39-0	C17H12F3N5O2S	FC(F)(F)OC1=CC=C(NC(=O)CSC2=NN=C3[NH]C4=CC=CC=C4[N]23)C=C1	16.868	35.829
PIK-93	PI3K	PI3K/Akt/mTOR	PIK-93 is the first potent, synthetic PI4K (PI4KIIIβ) inhibitor with IC50 of 19 nM shown to inhibit PI3Kα with IC50 of 39 nM.	389.88	593960-11-3	C14H16ClN3O4S2	CC(=O)NC1=NC(=C(S1)C2=CC(=C(Cl)C=C2)[S](=O)(=O)NCCO)C	42.5221	15.7599
WAY-304191	FLT3 receptor	Protein Tyrosine Kinase	CXCR3 antagonists	287.397	510724-22-8	C18H25NO2	COC1=CC=CC=C1C(=O)N2CC3(C)CC2CC(C)(C)C3	8.38061	2.14938
LY3405105	CDK	Cell Cycle	LY3405105 is an orally active CDK7 inhibitor with an IC50 of 92.8 nM. LY3405105 shows potential antineoplastic activity.	497.63	2326428-25-3	C26H39N7O3_x000D_	CC(C)C1=C2N=C(C)C=C(NC3CCN(CC3)C(=O)OC4CCN(C4)C(=O)\C=C\CN(C)C)[N]2N=C1	22.8278	10.8873
Ingenol	Cancer	PKC	Ingenol is a PKC activator, with a Ki of 30 μM, with antitumor activity.	348.433	30220-46-3	C20H28O5	CC1CC2C(C3C=C(CO)C(O)C4(O)C(O)C(=CC14C3=O)C)C2(C)C	10.177	21.0205
Chk2 Inhibitor II (BML-277)	Chk	Cell Cycle	Chk2 Inhibitor II (BML-277) is an ATP-competitive inhibitor of Chk2 with IC50 of 15 nM. It is 1000-fold more selective toward Chk2 serine/threonine kinase than for Chk1 and Cdk1/B kinases.	363.8	516480-79-8	C20H14ClN3O2	NC(=O)C1=CC=C2[NH]C(=NC2=C1)C3=CC=C(OC4=CC=C(Cl)C=C4)C=C3	69.1282	30.5559
WAY-325487	protein kinase-activated protein kinase-2	Others	altering the lifespan of a eukaryotic organism; mitogen activated protein kinase-activated protein kinase-2 inhibitor;	293.295	575471-15-7	C17H12FN3O	CC1=C(N=C(N)C(=C1C2=CC=CO2)C#N)C3=CC=C(F)C=C3	15.3475	17.8267
WAY-602746	ROS	Immunology & Inflammation	inhibition of ROS kinase	328.367	370096-57-4	C20H16N4O	CC1=NNC(=O)\C1=C/C2=C[N](N=C2C3=CC=CC=C3)C4=CC=CC=C4	12.8978	23.9373
Ruboxistaurin (LY333531 HCl)	PKC	TGF-beta/Smad	LY333531 is a β-specific protein kinase C inhibitor. It competitively and reversibly inhibits PKCβ1 and PKCβ2 with IC50 values of 4.7 and 5.9 nM respectively.	505.01	169939-93-9	C28H29ClN4O3	Cl.CN(C)CC1CC[N]2C=C(C3=C2C=CC=C3)C4=C(C(=O)NC4=O)C5=C[N](CCO1)C6=C5C=CC=C6	9.60848	13.0219
RG14620	EGFR	Protein Tyrosine Kinase	RG14620, an EGFR inhibitor of the tyrphostin family, directly inhibits the transport function of ABCG2 .	275.13	136831-49-7	C14H8Cl2N2_x000D_	ClC1=CC(=CC(=C1)Cl)\C=C(C#N)/C2=CC=CN=C2	32.7908	32.688
Tanespimycin (17-AAG)	HSP (e.g. HSP90)	Cytoskeletal Signaling	Tanespimycin (17-AAG) is a potent HSP90 inhibitor with IC50 of 5 nM in a cell-free assay, having a 100-fold higher binding affinity for HSP90 derived from tumour cells than HSP90 from normal cells. Phase 2.	585.69	75747-14-7	C31H43N3O8	COC1CC(C)CC2=C(NCC=C)C(=O)C=C(NC(=O)C(=C\C=C/C(OC)C(OC(N)=O)/C(=C/C(C)C1O)C)\C)C2=O	-10.8666	-25.4179
Urolithin B	NF-κB. IκB/IKK. JNK. ERK. Akt. AMPK	NF-κB	Urolithin B inhibits <b>NF-κB</b> activity by reducing the phosphorylation and degradation of <b>IκBα</b>. Urolithin B suppresses the phosphorylation of <b>JNK</b>, <b>ERK</b>, and <b>Akt</b>, and enhances the phosphorylation of <b>AMPK</b>. Urolithin B is also a regulator of <b>skeletal muscle mass</b>.	212.2	1139-83-9	C13H8O3_x000D_	OC1=CC2=C(C=C1)C3=CC=CC=C3C(=O)O2	29.5937	7.15563
AIM-100	ACK	Protein Tyrosine Kinase	AIM-100 is a potent small molecule inhibitor of <b>Ack1</b> with IC50 of 24nM.	371.43	873305-35-2	C23H21N3O2_x000D_	C1COC(C1)CNC2=NC=NC3=C2C(=C(O3)C4=CC=CC=C4)C5=CC=CC=C5	-0.736271	23.0661
Refametinib (RDEA119, Bay 86-9766)	MEK	MAPK	Refametinib (RDEA119, Bay 86-9766) is a potent, ATP non-competitive and highly selective inhibitor of MEK1 and MEK2 with IC50 of 19 nM and 47 nM, respectively.	572.34	923032-37-5	C19H20F3IN2O5S	COC1=C(N[S](=O)(=O)C2(CC2)CC(O)CO)C(=C(F)C(=C1)F)NC3=CC=C(I)C=C3F	13.0465	-15.5401
WAY-340935	VEGFR2 kinase	Protein Tyrosine Kinase ,Angiogenesis	VEGFR2 kinase inhibitors	315.165	737818-56-3	C15H11BrN2O	BrC1=CC=C(COC2=NC=NC3=CC=CC=C23)C=C1	-9.52111	0.188189
Glabridin	GABA Receptor,PPAR	Metabolism	Glabridin, one of the active phytochemicals in licorice extract, binds to and activates the ligand binding domain of PPARγ, as well as the full length receptor. It is also a GABAA receptor positive modulator promoting fatty acid oxidation and improving learning and memory.	324.37	59870-68-7	C20H20O4	CC1(C)OC2=C(C=C1)C3=C(CC(CO3)C4=CC=C(O)C=C4O)C=C2	11.8002	-0.491398
7-Hydroxy-4-chromone	Src	Cancer	7-Hydroxychromone is a Src kinase inhibitor with an IC50 of <300 μM.	162.142	59887-89-7	C9H6O3	OC1=CC=C2C(=O)C=COC2=C1	-1.89618	1.71218
WAY-359594	G protein coupled receptor 6 kinase	GPCR & G Protein	Inhibiting G protein coupled receptor 6 kinase	371.432	33495-39-5	C23H21N3O2	CCOC1=CC=C(NC(C2=CC=CC=N2)C3=C(O)C4=C(C=CC=N4)C=C3)C=C1	6.07631	0.77289
Decursinol angelate	PKC	Cytoskeletal Signaling	Decursinol angelate is a cytotoxic and protein kinase C activating agent from the root of Angelica gigas.	328.36	130848-06-5	C19H20O5	C\C=C(C)/C(=O)OC1CC2=CC3=C(OC(=O)C=C3)C=C2OC1(C)C	1.20883	8.45797
WAY-312602	maternal embryonic leucine zipper kinase	others	maternal embryonic leucine zipper kinase inhibitors	339.349	681266-13-7	C17H17N5O3	CCC1=C2C(C3=CC(=CC=C3)OCC(N)=O)C(=C(N)OC2=N[NH]1)C#N	15.7175	10.0246
Solcitinib	JAK	JAK/STAT	Solcitinib is an inhibitor of <b>JAK1</b> with an IC50 of 8-9 nM, and shows 11-, 55- and 23-fold selectivity over JAK2, JAK3 and TYK2, respectively.	389.45	1206163-45-2	C22H23N5O2	CC1(C)CN(C1)C(=O)C2=CC=C(C=C2)C3=CC=CC4=NC(=N[N]34)NC(=O)C5CC5	39.3091	30.3209
A-769662	AMPK,Fatty Acid Synthase	PI3K/Akt/mTOR	A-769662 is a potent, reversible AMPK activator with EC50 of 0.8 μM in cell-free assays, little effect on GPPase/FBPase activity.	360.39	844499-71-4	C20H12N2O3S	OC1=CC=CC=C1C2=CC=C(C=C2)C3=CSC4=C3C(=C(C#N)C(=O)N4)O	9.78476	0.707741
Go6976	FLT3,JAK,PKC	TGF-beta/Smad	Go6976 is a potent PKC inhibitor with IC50 of 7.9 nM, 2.3 nM, and 6.2 nM for PKC (Rat brain), PKCα, and PKCβ1, respectively. Also a potent inhibitor of JAK2 and Flt3.	377.42	136194-77-9	C24H18N4O	C[N]1C2=C(C=CC=C2)C3=C1C4=C(C5=C3C(=O)NC5)C6=C(C=CC=C6)[N]4CCC#N	24.1608	-2.52172
3-Hydroxyanthranilic acid	PI3K, Akt, mTOR, NF-κB	PI3K/Akt/mTOR	3-Hydroxyanthranilic Acid (3-HAA, 3-HANA), a tryptophan metabolite, has an immunomodulatory effect that may result from inhibition of <b>PI3K/Akt/mTOR</b> and <b>NF-&kappa;B</b> activity, thereby decreasing the production of pro-inflammatory mediators.</p>	153.14	548-93-6	C7H7NO3_x000D_	NC1=C(C=CC=C1O)C(O)=O	19.8951	12.894
BSJ-03-123	CDK	Cell Cycle	BSJ-03-123 is a phthalimide-based degrader of <b>cyclin-dependent kinase 6 (CDK6)</b>. (PROTAC)	937.01	2361493-16-3	C47H56N10O11_x000D_	CC(=O)C1=C(C)C2=CN=C(NC3=CC=C(C=N3)N4CCN(CCOCCOCCOCCNC(=O)COC5=CC=CC6=C5C(=O)N(C7CCC(=O)NC7=O)C6=O)CC4)N=C2N(C8CCCC8)C1=O	0.590957	7.1298
WAY-215718	5-HT Receptor,pp6othersc-Src tyrosine kinase	Neuronal Signaling,	5-HT6 receptor antagonist	229.321	128175-06-4	C14H19N3	CN1CCN(CC1)CC2=C[NH]C3=CC=CC=C23	5.07228	11.3472
3-Deazaadenosine hydrochloride	TNF-alpha	Apoptosis	3-Deazaadenosine HCl is a potent inhibitor of S-adenosylhomocysteine hydrolase with Ki of 3.9 µM. 3-Deazaadenosine HCl inhibits bacterial lipopolysaccharide-induced transcription of TNF-α and IL-1β. 3-Deazaadenosine HCl inhibits the transcriptional activity of NF-κB, prevents FCS-induced Ras carboxyl methylation and reduces FCS-induced ERK1/2 and Akt phosphorylation. 3-Deazaadenosine HCl has anti…	302.71	86583-19-9	C11H15ClN4O4_x000D_	Cl.NC1=NC=CC2=C1N=C[N]2C3OC(CO)C(O)C3O	17.9454	10.0834
Scutellarin	Others	Others	Scutellarin, the major active principal flavonoids extracted from the Chinese herbal medicines Scutellaria baicalensis and Erigeron breviscapus (Vant.) Hand-Mazz, has many pharmacological effects, such as antioxidant, antitumor, antiviral, and antiinflammatory activities.	462.36	27740-01-8	C21H18O12	OC1C(O)C(OC(C1O)C(O)=O)OC2=CC3=C(C(=O)C=C(O3)C4=CC=C(O)C=C4)C(=C2O)O	33.4517	4.87652
WAY-354896	PKR,PERK	others	Dual Activators of Protein Kinase R (PKR) and Protein Kinase R-Like Kinase (PERK)	312.317	136498-37-8	C18H16O5	COC1=CC2=C(OC(CC2=O)C3=CC4=C(OCCO4)C=C3)C=C1	-7.21622	11.1044
WAY-324420	Mycobacterium tuberculosis shikimate kinase	Microbiology	Mycobacterium tuberculosis shikimate kinase (MtSk) inhibitor	276.314	681838-50-6	C12H12N4O2S	CC(SC1=NN=C2[N](C)C3=C(C=CC=C3)[N]12)C(O)=O	-10.9509	26.3852
CS-2660 (JNJ-38158471)	VEGFR	Protein Tyrosine Kinase	CS-2660 (JNJ-38158471) is a well tolerated, orally available, highly selective VEGFR-2 inhibitor with IC50 of 40 nM. CS-2660 (JNJ-38158471) also inhibits closely related tyrosine kinases such as Ret and Kit with IC50 of 180 nM and 500 nM，while it has no significant activity (>1 microM) against VEGFR-1 and VEGFR-3.	364.79	951151-97-6	C15H17ClN6O3_x000D_	CCNC(=O)NC1=CC=C(OC2=NC=NC(=C2\C=N\OC)N)C=C1Cl	1.92157	4.88157
WAY-119064	INK4C	others	INK4C small-molecule inhibitors	282.359	1198098-03-1	C13H18N2O3S	CC(=O)NC1=CC=C(C=C1)[S](=O)(=O)NC2CCCC2	4.64561	-0.468898
WAY-661516	Aurora kinase A	Cell Cycle & Epigenetics	Aurora kinase A inhibitor	371.748	875163-98-7	C15H15ClFN3O5	CC1(C)NC(=O)N(CC(=O)OCC(=O)NC2=C(F)C=C(Cl)C=C2)C1=O	-5.59585	24.553
Kaempferitrin	Others	Others	Kaempferitrin has an acute lowering effect on blood glucose in diabetic rats and to stimulate the glucose uptake percentile, as efficiently as insulin in muscle from normal rats. Kaempferitrin improves insulin resistance by the activation of the classical insulin transduction pathway, and increases adiponectin secretion. Kaempferitrin exerts cytotoxic and antitumor effects against HeLa cells, the…	578.519	482-38-2	C27H30O14	CC1OC(OC2=CC3=C(C(=C2)O)C(=O)C(=C(O3)C4=CC=C(O)C=C4)OC5OC(C)C(O)C(O)C5O)C(O)C(O)C1O	6.52929	20.2655
WAY-297342	FLT3,SirT1,ATP-utilizing enzyme	Microbiology	Inhibitors of Influenza Virus Polymerase; FLT3 inhibitors; SirT1-modulating compounds ; ATP-utilizing enzyme inhibitory activity; kinase inhibitors;	301.363	298207-49-5	C15H15N3O2S	NC(=O)C1=C(NC(=O)C2=CC=CN=C2)SC3=C1CCCC3	23.1509	16.4229
WAY-326890	kinase	Others	altering the lifespan of a eukaryotic organism; kinase inhibitory activity;	375.465	685865-67-2	C17H17N3O3S2	CC1=CC=CC(=C1C)NC(=O)CC[S](=O)(=O)C2=CC=CC3=NSN=C23	8.70165	25.0594
WAY-320008	tropomyosin-related kinase a	others	tropomyosin-related kinase a inhibitors; Inhibitors of Tropomyosin-Related Kinase A;	312.368	128889-33-8	C20H16N4	NC1=CC=C(C=C1)C2=NC3=C(C=C(N)C=C3)C(=N2)C4=CC=CC=C4	26.5464	36.6268
WAY-603359	p38	MAPK	altering the lifespan of a eukaryotic organism; p38 kinase inhibitors;	241.674	329268-90-8	C10H12ClN3O2	OC(=O)C1=C(Cl)C=NC(=N1)N2CCCCC2	-17.4582	-1.40906
TAK-659	Syk,FLT3	Angiogenesis	TAK-659 is a potent and selective inhibitor of spleen tyrosine kinase (SYK) with an IC50 value of 3.2 nM. It is selective against most other kinases, but potent toward both SYK and FLT3.	380.85	1952251-28-3	C17H22ClFN6O	Cl.C[N]1C=C(C=N1)C2=C3C(=O)NCC3=C(F)C(=N2)NC4CCCCC4N	93.5637	8.81816
WAY-329594	kinase	others	kinase inhibitory activity	412.281	956910-37-5	C14H10BrN3O3S2	BrC1=C(NC(=O)C[S](=O)(=O)C2=CC=CC3=NSN=C23)C=CC=C1	-1.56699	18.2646
Pyridoxine	Vitamin	Metabolism	Pyridoxine, also known as vitamin B6, is a form of vitamin B6 found commonly in food and used as dietary supplement. It is a cofactor for both glutamic acid decarboxylase and GABA transaminase.	169.18	65-23-6	C8H11NO3	CC1=NC=C(CO)C(=C1O)CO	8.27494	23.2515
WAY-351812	CDK8	Cell Cycle	Novel CDK8 Inhibitors	373.35	471289-61-9	C15H14F3N3O3S	CN1C(=C(C(=O)CSC2=CC(=CC=C2)C(F)(F)F)C(=O)N(C)C1=O)N	10.3841	27.9299
BMS-265246	CDK	Cell Cycle	BMS-265246 is a potent and selective CDK1/2 inhibitor with IC50 of 6 nM/9 nM in a cell-free assay. It is 25-fold more selective for CDK1/2 than CDK4.	345.34	582315-72-8	C18H17F2N3O2	CCCCOC1=C2C=N[NH]C2=NC=C1C(=O)C3=C(F)C=C(C)C=C3F	61.8399	25.206
Benidipine HCl	Calcium Channel	Transmembrane Transporters	Benidipine HCl is a hydrochloride salt form of benidipine which is a dihydropyridine calcium channel blocker.	542.02	91599-74-5	C28H32ClN3O6	Cl.COC(=O)C1=C(C)NC(=C(C1C2=CC(=CC=C2)[N+]([O-])=O)C(=O)OC3CCCN(C3)CC4=CC=CC=C4)C	29.5309	18.8361
WAY-321341	SYK,Immunology & Inflammation related	Angiogenesis, Immunology & Inflammation related	syk inhibitor; Anti-inflammatory;	382.458	314027-66-2	C24H22N4O	COC1=CC=CC=C1CC(CC2=NC3=C([NH]2)C=CC=C3)C4=NC5=C([NH]4)C=CC=C5	4.23658	-0.954791
GNE-7915	LRRK2	Autophagy	GNE-7915 is a highly potent, selective, and brain-penetrable leucine-rich repeat kinase 2 (LRRK2) inhibitor, with IC50 and Ki of 9 nM and 1 nM, respectively.	443.4	1351761-44-8	C19H21F4N5O3	CCNC1=NC(=NC=C1C(F)(F)F)NC2=CC(=C(C=C2OC)C(=O)N3CCOCC3)F	-0.375528	17.9439
AMG-900	Aurora Kinase	Cell Cycle	AMG 900 is a potent and highly selective pan-Aurora kinases inhibitor for Aurora A/B/C with IC50 of 5 nM/4 nM /1 nM. It is >10-fold selective for Aurora kinases than p38α, Tyk2, JNK2, Met and Tie2. Phase 1.	503.58	945595-80-2	C28H21N7OS	CC1=CSC(=C1)C2=NN=C(NC3=CC=C(OC4=C(C=CC=N4)C5=NC(=NC=C5)N)C=C3)C6=C2C=CC=C6	38.8172	2.03579
IM-12	GSK-3	PI3K/Akt/mTOR	IM-12 is a selective GSK-3β inhibitor with IC50 of 53 nM, and also enhances canonical Wnt signalling.	377.41	1129669-05-1	C22H20FN3O2	CN1C(=O)C(=C(C1=O)C2=C(C)[NH]C3=C2C=CC=C3)NCCC4=CC=C(F)C=C4	2.5252	21.9023
Glesatinib?(MGCD265)	c-Met,Tie-2,VEGFR	Protein Tyrosine Kinase	Glesatinib?(MGCD265) is a potent, multi-target and ATP-competitive inhibitor of c-Met and VEGFR1/2/3 with IC50 of 1 nM, 3 nM/3 nM/4 nM, respectively also inhibits Ron and Tie2. Phase 1/2.	517.6	875337-44-3	C26H20FN5O2S2	C[N]1C=NC(=C1)C2=CC3=NC=CC(=C3S2)OC4=CC=C(NC(=S)NC(=O)CC5=CC=CC=C5)C=C4F	56.4292	29.289
Foretinib (GSK1363089)	c-Met,VEGFR	Protein Tyrosine Kinase	Foretinib (GSK1363089) is an ATP-competitive inhibitor of HGFR and VEGFR, mostly for Met and KDR with IC50 of 0.4 nM and 0.9 nM in cell-free assays. Less potent against Ron, Flt-1/3/4, Kit, PDGFRα/β and Tie-2, and little activity to FGFR1 and EGFR. Phase 2.	632.65	849217-64-7	C34H34F2N4O6	COC1=CC2=C(C=C1OCCCN3CCOCC3)N=CC=C2OC4=C(F)C=C(NC(=O)C5(CC5)C(=O)NC6=CC=C(F)C=C6)C=C4	40.6368	0.916432
WAY-273339	IGF-1R	Protein Tyrosine Kinase	IGF-1R inhibitor	278.737	443097-57-2	C13H15ClN4O	CC(C)(C)C1=NN=C(NC1=O)NC2=CC=C(Cl)C=C2	-6.39288	27.1961
WAY-323878-A	CDK	Cell Cycle	CDKI pathway inhibitor; CDKI pathway inhibitor;	250.295	1185726-51-5	C16H14N2O	C=CC[N]1C(=NC2=CC=CC=C12)/C=C/C3=CC=CO3	26.4528	3.51289
Takinib	IL Receptor	Immunology & Inflammation	Takinib is a potent and selective TAK1 inhibitor with an IC50 of 9.5 nM, more than 1.5 log more potent than the second and third ranked targets, IRAK4 (120 nM) and IRAK1 (390 nM), respectively.	322.36	1111556-37-6	C18H18N4O2	CCC[N]1C(=NC2=CC=CC=C12)NC(=O)C3=CC(=CC=C3)C(N)=O	20.5732	-2.11783
WAY-624704	ROCK	Cell Cycle,TGF-beta/Smad,Stem Cells,Wnt,	ROCK Inhibitors	325.385	692869-38-8	C17H15N3O2S	COC1=CC=C(CC(=O)NC2=NC(=CS2)C3=CC=NC=C3)C=C1	21.3441	8.04554
JH-X-119-01	IRAK	Immunology & Inflammation	JH-X-119-01 is a highly potent and selective covalent inhibitor of IRAK1 with IC50 of 9 nM.	452.46	2227368-54-7	C25H20N6O3_x000D_	C=CC(=O)NC1=CC=CC(=C1)C(=O)NC2=CC=C(NC(=O)C3=NC(=CC=C3)C4=CC=N[NH]4)C=C2	32.5045	-6.76646
WAY-353890	FGFR1	Angiogenesis ,Protein Tyrosine Kinase	inhibitors of protein kinase FGFR1; altering the lifespan of eukaryotic organisms;	308.31	459137-97-4	C17H13FN4O	NC1=C(C(=O)CN1C2=CC=C(F)C=C2)C3=NC4=C([NH]3)C=CC=C4	17.4738	21.0412
WAY-600632	Casein kinase 1δ	Metabolism	Casein kinase 1δ inhibitor	315.37	438018-70-3	C14H9N3O2S2	O=C(N(C(=O)C1=CC=CS1)C2=NC=CC=N2)C3=CC=CS3	2.54885	8.8143
Pinoresinol diglucoside	Others	Others	Pinoresinol diglucoside, one of the major lignans isolated from Eucommia ulmoides Oliver bark, has various pharmacological functions, including antihypertension and prevention of osteoporosis.	682.67	63902-38-5	C32H42O16_x000D_	COC1=CC(=CC=C1OC2OC(CO)C(O)C(O)C2O)C3OCC4C3COC4C5=CC=C(OC6OC(CO)C(O)C(O)C6O)C(=C5)OC	14.5294	20.5435
BP-1-102	STAT	JAK/STAT	BP-1-102 is a potent, orally bioavailable and selective STAT3 inhibitor, binds Stat3 with an affinity Kd of 504 nM and blocks Stat3-phospho-tyrosine (pTyr) peptide interactions and Stat3 activation at 4-6.8 μM.	626.59	1334493-07-0	C29H27F5N2O6S	CN(CC(=O)N(CC1=CC=C(C=C1)C2CCCCC2)C3=CC(=C(C=C3)C(O)=O)O)[S](=O)(=O)C4=C(F)C(=C(F)C(=C4F)F)F	26.7096	-3.93406
CC-401 Hydrochloride	JNK	MAPK	CC-401 is a potent inhibitor of <b>JNK</b> with at least 40-fold selectivity against other related kinases.	424.93	1438391-30-0	C22H25ClN6O_x000D_	Cl.C1CCN(CC1)CCOC2=CC(=CC=C2)C3=N[NH]C4=CC=C(C=C34)C5=NC=N[NH]5	30.4444	14.7001
Fraxinellone	Others	anti-inflammatory	Fraxinellone possesses neuroprotective and vasorelaxing activities, it also has anti-inflammatory activity, the anti-inflammatory properties of fraxinellone are related to the down-regulations of iNOS and COX-2 due to NF-kappa B inhibition through the negative regulations of IKK and ERK1/2 phosphorylations in RAW 264.7 cells. Fraxinellone is a selective blocker of voltage-dependent Ca2+ channel, …	232.275	28808-62-0	C14H16O3	CC1=C2C(=O)OC(C3=COC=C3)C2(C)CCC1	8.30725	-3.37278
WAY-302713-A	Pim-1	others	Pim-1 inhibitors	341.341	443747-52-2	C16H11N3O4S	OC(=O)C1=CC=CC(=C1)NC2=NC(=CS2)C3=CC(=CC=C3)[N+]([O-])=O	80.7577	40.1623
ARQ 531	BTK	Tyrosine-Kinase	ARQ 531 is a reversible non-covalent inhibitor of Bruton’s Tyrosine Kinase (BTK), with IC50s of 0.85 nM and 0.39 nM for WT BTK and C481S BTK, respectively	478.93	2095393-15-8	C25H23ClN4O4	OCC1CCC(CO1)NC2=C3C(=NC=N2)[NH]C=C3C(=O)C4=CC=C(OC5=CC=CC=C5)C=C4Cl	26.3897	-2.58343
Roscovitine (Seliciclib,CYC202)	CDK	Cell Cycle	Roscovitine (Seliciclib, CYC202) is a potent and selective CDK inhibitor for Cdc2, CDK2 and CDK5 with IC50 of 0.65 μM, 0.7 μM and 0.16 μM in cell-free assays. It shows little effect on CDK4/6. Phase 2.	354.45	186692-46-6	C19H26N6O	CCC(CO)NC1=NC(=C2N=C[N](C(C)C)C2=N1)NCC3=CC=CC=C3	55.4717	-8.48982
Salubrinal	PERK	Apoptosis	Salubrinal is a selective inhibitor of eIF2α dephosphorylation and inhibits ER stress-mediated apoptosis with EC50 of ~15 μM in a cell-free assay.	479.81	405060-95-9	C21H17Cl3N4OS	ClC(Cl)(Cl)C(NC(=O)\C=C\C1=CC=CC=C1)NC(=S)NC2=CC=CC3=C2N=CC=C3	19.237	3.32366
CGK 733	ATM/ATR	DNA Damage	CGK 733 is a potent and selective inhibitor of ATM/ATR with IC50 of ~200 nM.	555.84	905973-89-9	C23H18Cl3FN4O3S	[O-][N+](=O)C1=CC(=CC=C1F)NC(=S)NC(NC(=O)C(C2=CC=CC=C2)C3=CC=CC=C3)C(Cl)(Cl)Cl	6.92366	7.55293
WAY-347806	CK2,GSK3β	PI3K/Akt/mTOR	dual kinase inhibitors of CK2 and GSK3β; dual kinase inhibitors of CK2 and GSK3β; dual kinase inhibitors of CK2 and GSK3β; dual kinase inhibitors of CK2 and GSK3β; dual kinase inhibitors of CK2 and GSK3β; dual kinase inhibitors of CK2 and GSK3β;	360.36	757198-76-8	C17H13FN2O4S	COC1=CC=C(CSC2=NN=C(O2)C3=CC4=C(OCO4)C=C3)C=C1F	22.2452	41.3655
Savolitinib(AZD6094, HMPL-504)	c-Met	Protein Tyrosine Kinase	Savolitinib (volitinib, AZD6094, HMPL-504) is a novel, potent, and selective MET inhibitor currently in clinical development in various indications, including PRCC. The IC50 values of this compound for c-Met and p-Met are 5 nM and 3 nM, respectively. It shows exquisite selectivity for c-Met over 274 kinase.	345.36	1313725-88-0	C17H15N9	CC([N]1N=NC2=NC=C(N=C12)C3=C[N](C)N=C3)C4=C[N]5C=CN=C5C=C4	20.8106	34.1332
BAY 11-7082	E2 conjugating,IκB/IKK	NF-κB	BAY 11-7082 is a NF-κB inhibitor, inhibits TNFα-induced IκBα phosphorylation with IC50 of 10 μM in tumor cells. Also inhibiting components of the ubiquitin system.	207.25	19542-67-7	C10H9NO2S	CC1=CC=C(C=C1)[S](=O)(=O)\C=C\C#N	24.3159	-9.16046
WHI-P180	VEGFR	Protein Tyrosine Kinase	WHI-P180 is a multi-kinase inhibitor with IC50 values of 4.5 and 66 nM for the human proto-oncogene RET and kinase insert domain receptor (KDR) , respectively.	297.31	211555-08-7	C16H15N3O3_x000D_	COC1=CC2=NC=NC(=C2C=C1OC)NC3=CC(=CC=C3)O	19.3843	9.24285
WAY-306955	p38a MAPK	others	modulators of transcriptional repression	306.385	315703-48-1	C17H14N4S	CC1=C([N]2C=CC=CC2=N1)C3=CSC(=N3)NC4=CC=CC=C4	82.9581	35.7867
Kaempferol-3-O-neohesperidoside	Carbohydrate Metabol	Metabolism	Kaempferol 3-neohesperidoside (Kaempferol 3-O-neohesperidoside), a flavonoid isolated from the leaf extract of Primula latifolia Lapeyr. and Primula vulgaris Hudson, stimulates glycogen synthesis in rat soleus muscle via PI3K - GSK-3 pathway and MAPK - PP1 pathway.	594.52	32602-81-6	C27H30O15_x000D_	CC1OC(OC2C(O)C(O)C(CO)OC2OC3=C(OC4=CC(=CC(=C4C3=O)O)O)C5=CC=C(O)C=C5)C(O)C(O)C1O	3.86343	-0.33827
WAY-638641	Aurora kinase A	Cell Cycle & Epigenetics	Aurora kinase A inhibitor	363.388	796068-62-7	C16H17N3O5S	O=C(CN1C(=O)NC2(CCSC2)C1=O)NCC3=CC4=C(OCO4)C=C3	7.01983	8.25789
MHP	S1P Receptor	GPCR & G Protein	Defensamide (MHP) is an activator of sphingosine kinase (SPHK1) . It can modulate the innate epidermal immune response by potentiating SPHK1 activity and inducing cAMP production.	293.36	1104874-94-3	C16H23NO4	CCCCCC(=O)NC(CC1=CC=C(O)C=C1)C(=O)OC	37.2114	34.3038
WAY-636900	Aurora kinase A	Cell Cycle & Epigenetics	Aurora kinase A inhibitor	428.462	792965-51-6	C20H20N4O5S	CCC1(CC)NC(=O)N(CC(=O)OCC2=CC(=O)N3C(=N2)SC4=C3C=CC=C4)C1=O	14.4488	10.5498
Y15	FAK	Angiogenesis	Y15 is a small-molecule FAK scaffolding inhibitor that directly inhibits FAK autophosphorylation in a dose- and time-dependent manner.	284.01	4506-66-5	C6H14Cl4N4	Cl.Cl.Cl.Cl.NC1=CC(=C(N)C=C1N)N	19.4019	-0.191711
PI-3065	PI3K	PI3K/Akt/mTOR	PI-3065 is a selective p110δ inhibitor with IC50 of 15 nM, >70-fold selectivity over other PI3K family members.	506.64	955977-50-1	C27H31FN6OS	FC1=C(C2=NC3=C(SC(=C3)CN4CCN(CC4)CC5CC5)C(=N2)N6CCOCC6)C7=C([NH]C=C7)C=C1	-17.8409	7.79918
WAY-635764	Aurora kinase A	Cell Cycle & Epigenetics	Aurora kinase A inhibitor	429.509	790267-88-8	C23H31N3O5	CC1CC(C)(C)CC2(C1)NC(=O)N(CC(=O)OCC(=O)NC3=CC(=C(C)C=C3)C)C2=O	8.02712	-13.6497
Mito-TEMPO	RIP kinase	Apoptosis	Mito-TEMPO (MT), a mitochondria-targeted superoxide dismutase mimetic, protects against the early phase of acetaminophen (APAP) hepatotoxicity by inhibiting peroxynitrite formation. Mito-TEMPO treatment inhibits APAP-induced RIP3 kinase expression.	510.03	1334850-99-5	C29H35N2O2P.Cl	[Cl-].CC1(C)CC(CC(C)(C)N1[O])NC(=O)C[P+](C2=CC=CC=C2)(C3=CC=CC=C3)C4=CC=CC=C4	5.73053	-14.0574
4EGI-1	Others	Others	4EGI-1 is a competitive eIF4E/eIF4G interaction inhibitor by binding to eIF4E with KD of 25 μM.	451.28	315706-13-9	C18H12Cl2N4O4S	OC(=O)C(/CC1=CC=CC=C1[N+]([O-])=O)=N/NC2=NC(=CS2)C3=CC=C(Cl)C(=C3)Cl	24.0195	29.1732
WAY-612698	Mycobacterium tuberculosis shikimate kinase	Others	altering the lifespan of eukaryotic organisms; Mycobacterium tuberculosis shikimate kinase inhibitors;	333.402	565191-45-9	C17H19NO4S	OC(=O)C1=C(SC2CC(=O)N(C3CCCCC3)C2=O)C=CC=C1	-18.5519	-1.25281
WAY-299819	p38 MAPK,c-Jun-N-Terminal Kinase	MAPK,	altering the lifespan of a eukaryotic organism; antitubercular activity; PKB inhibitors; Inhibitors of c-Jun-N-Terminal Kinase	251.732	346663-56-7	C12H10ClNOS	ClC1=CC=C(NC(=O)CC2=CC=CS2)C=C1	11.8387	1.93943
(-)-Epigallocatechin Gallate	DNA Methyltransferase,HER2,Telomerase,EGFR,Fatty Acid Synthase	DNA Damage	(-)-Epigallocatechin Gallate(EGCG) is the main catechin extraction of green tea that inhibits telomerase and DNA methyltransferase. EGCG blocks the activation of EGF receptors and HER-2 receptors. ECGG inhibits fatty acid synthase and glutamate dehydrogenase activity.	458.37	989-51-5	C22H18O11	OC1=CC2=C(CC(OC(=O)C3=CC(=C(O)C(=C3)O)O)C(O2)C4=CC(=C(O)C(=C4)O)O)C(=C1)O	14.5103	2.26903
Imidazolo-oxindole PKR inhibitor C16	PKR	ER stress & UPR	PKR-IN-C16 (imoxin, C16, Imidazolo-oxindole PKR inhibitor C16) is a specific inhibitor of <b>RNA-dependent protein kinase (PKR, Protein Kinase R, EIF2AK2)</b>. PKR-IN-C16 prevents <b>apoptosis</b> and <b>IL-1β</b> production in an acute excitotoxic rat model with a neuroinflammatory component.	268.29	608512-97-6	C13H8N4OS_x000D_	O=C1NC2=CC=C3N=CSC3=C2\C1=C\C4=CN=C[NH]4	15.6116	-14.3146
WAY-301205	Mycobacterium tuberculosis shikimate kinase	Transmembrane Transporters	Mycobacterium tuberculosis shikimate kinase inhibitors	336.472	330181-93-6	C16H20N2O2S2	CSC1=NC2=C(C(=O)N1CC(C)=C)C3=C(COC(C)(C)C3)S2	37.9292	26.8116
SU5214	EGFR	Protein Tyrosine Kinase	SU5214 is a inhibitor of <b>VEGF receptor 2 (VEGFR2/FLK-1)</b> with IC50 of 14.8 µM and <b>EGFR</b> with IC50 of 36.7 µm, respectively.	251.28	186611-04-1	C16H13NO2_x000D_	COC1=CC=CC=C1/C=C/2C(=O)NC3=CC=CC=C23	21.7475	7.45064
Lavendustin B	Integrase	Microbiology	Lavendustin B inhibits <b>HIV-1 integrase (IN)</b> interaction with its cognate cellular cofactor <b>lens epithelium-derived growth factor (LEDGF/p75)</b>. Lavendustin B is an inhibitor of Tyrosine Kinase and also a competitive inhibitor of <b>glucose transporter 1 (Glut1)</b>.	365.38	125697-91-8	C21H19NO5_x000D_	OC(=O)C1=C(O)C=CC(=C1)N(CC2=CC=CC=C2O)CC3=CC=CC=C3O	54.9595	-4.82851
Butein	EGFR	Protein Tyrosine Kinase	Butein, a plant polyphenol isolated from Rhus verniciflua, is able to inhibit the activation of protein tyrosine kinase, NF-κB and STAT3, also inhibits EGFR.	272.25	487-52-5	C15H12O5	OC1=CC(=C(C=C1)C(=O)\C=C\C2=CC(=C(O)C=C2)O)O	23.0716	4.13447
Tanzisertib(CC-930)	JNK	MAPK	CC-930 is kinetically competitive with ATP in the JNK-dependent phosphorylation of the protein substrate c-Jun and potent against all isoforms of JNK (Ki(JNK1) = 44 ± 3 nM, IC50(JNK1) = 61 nM, Ki(JNK2) = 6.2 ± 0.6 nM, IC50(JNK2) = 5 nM, IC50(JNK3) = 5 nM) and selective against MAP kinases ERK1 and p38a with IC50 of 0.48 and 3.4 μM respectively.	484.9	899805-25-5 (free base)	C21H24ClF3N6O2	Cl.OC1CCC(CC1)NC2=NC3=C(C=N2)N=C(NC4=C(F)C=C(F)C=C4F)[N]3C5CCOC5	8.95581	-3.44611
Evodiamine	NF-κB	NF-κB	Evodiamine (Isoevodiamine), an alkaloid extract from the fruit of Evodiae Fructus exhibits antitumor activities against the human tumor cells. It is shown to inhibit <b>NF-kB</b> activation through suppression of <b>IkB kinase</b> activity.	303.36	518-17-2	C19H17N3O_x000D_	CN1C2N(CCC3=C2[NH]C4=CC=CC=C34)C(=O)C5=C1C=CC=C5	39.4107	13.0817
AZ 628	Raf	MAPK	AZ628 is a new pan-Raf inhibitor for BRAF, BRAFV600E, and c-Raf-1 with IC50 of 105 nM, 34 nM and 29 nM in cell-free assays, also inhibits VEGFR2, DDR2, Lyn, Flt1, FMS, etc.	451.52	878739-06-1	C27H25N5O2	CN1C=NC2=C(C=C(NC3=CC(=CC=C3C)NC(=O)C4=CC(=CC=C4)C(C)(C)C#N)C=C2)C1=O	67.9929	15.2926
BAY-1816032	Others	Others	BAY-1816032 is a potent and oral available inhibitor of <b>budding uninhibited by benzimidazoles 1 (BUB1)</b> kinase with IC50 of 6.1 nM for recombinant catalytic domain of human BUB1. BAY-1816032 has antitumor activity.	534.51	1891087-61-8	C27H24F2N6O4_x000D_	COC1=C(NC2=NC(=NC=C2OC)C3=N[N](CC4=C(F)C=C(OCCO)C=C4F)C5=C3C=CC=C5)C=CN=C1	0.321758	27.3072
ML365	Potassium Channel	Transmembrane Transporters	ML365 is a novel selective small molecule inhibitor of the TASK1 or potassium channel, subfamily K, member 9 (KCNK3) .	360.41	947914-18-3	C22H20N2O3_x000D_	COC1=CC=CC=C1C(=O)NC2=CC=CC(=C2)NC(=O)C3=CC=CC(=C3)C	12.4281	-0.100852
WAY-239448	CK2,Anti-infection	Metabolism ,Stem Cells,Wnt,Microbiology	CK2 inhibitor; anti-viral;	236.356	314260-78-1	C11H12N2S2	CC1CCC2=C(C1)SC3=C2C(=S)NC=N3	-6.59297	8.75807
NPS-1034	c-Met,TAM Receptor	Protein Tyrosine Kinase	NPS-1034 is a dual Met/Axl inhibitor with IC50 of 48 nM and 10.3 nM, respectively.	551.54	1221713-92-3	C31H23F2N5O3	CN1N(C(=O)C(=C1C)C(=O)NC2=CC=C(OC3=CC=NC4=C3C(=C[NH]4)C5=CC=CC=C5)C(=C2)F)C6=CC=C(F)C=C6	-8.86008	46.5102
WAY-602219	Trypanosoma brucei hexokinase	others	Trypanosoma brucei hexokinase inhibitor; altering the lifespan of a eukaryotic organism;	320.387	378197-09-2	C14H12N2O3S2	CCOC(=O)CC1=CSC(=N1)N2SC3=C(C=CC=C3)C2=O	-5.87163	11.4259
TG003	CDK	Cell Cycle	TG003 is a potent and ATP-competitive Cdc2-like kinase (Clk) inhibitor with IC50 of 20 nM, 200 nM, and 15 nM for Clk1, Clk2, and Clk4, respectively. No inhibitory effect on Clk3, SRPK1, SRPK2, or PKC.	249.33	300801-52-9	C13H15NO2S	CCN1\C(SC2=C1C=C(OC)C=C2)=C\C(C)=O	9.82435	11.6238
Dibutyryl-cAMP (Bucladesine)	PKA	Others	Dibutyryl-cAMP (Bucladesine) is a cell-permeable PKA activator by mimicing the action of endogenous cAMP.	491.37	16980-89-5	C18H23N5NaO8P	CCCC(=O)NC1=NC=NC2=C1N=C[N]2C3OC4CO[P](=O)(O[Na])OC4C3OC(=O)CCC	-7.37298	19.0253
XMD8-92	ERK	MAPK	XMD8-92 is a potent and selective BMK1/ERK5 inhibitor with Kd of 80 nM.	474.55	1234480-50-2	C26H30N6O3	CCOC1=CC(=CC=C1NC2=NC3=C(C=N2)N(C)C(=O)C4=C(C=CC=C4)N3C)N5CCC(O)CC5	1.29113	24.9245
Norisoboldine	Others	inflammation	Norisoboldine has been previously implicated to be able to ameliorate the synovial inflammation and abnormal immune conditions in collagen-induced arthritis of mice; it inhibits the macrophage activation and the resultant production of pro-inflammatory cytokines via down-regulating the activation of MAPKs signaling pathways rather than NF-κB. Norisoboldine can alleviate joint destruction in AIA r…	313.348	23599-69-1	C18H19NO4	COC1=CC2=C(CC3NCCC4=C3C2=C(O)C(=C4)OC)C=C1O	3.81279	17.5869
WAY-635319	CDK	Cell Cycle	CDK9 Inhibitors	282.294	763098-07-3	C16H14N2O3	O=C(OCCOC1=CC=CC=C1)C2=N[NH]C3=C2C=CC=C3	21.5517	-8.15302
WL-300778	ROCK,Pteridine Reductase 1	Cell Cycle,TGF-beta/Smad,Stem Cells,Wnt	inhibitors of Rho associated protein kinases (ROCK1 and 2); Pteridine Reductase 1 Inhibitors;	177.226	802980-14-9	C8H7N3S	NC1=NC(=CS1)C2=CC=NC=C2	9.85777	6.66172
Sphingosine	Others	Others	Sphingosine is an 18-carbon amino alcohol with an unsaturated hydrocarbon chain, which forms a primary part of sphingolipids, a class of cell membrane lipids that include sphingomyelin, an important phospholipid.	299.49	123-78-4	C18H37NO2_x000D_	CCCCCCCCCCCCC/C=C/C(O)C(N)CO	7.6915	19.5263
AS1517499	STAT	JAK/STAT	AS1517499 is a novel and potent STAT6 inhibitor with an IC50 value of 21 nM.	397.86	919486-40-1	C20H20ClN5O2	NC(=O)C1=CN=C(NCCC2=CC=C(O)C(=C2)Cl)N=C1NCC3=CC=CC=C3	13.8503	14.61
WAY-601017	PI3K	PI3K/Akt/mTOR	phosphatidylinositol 3-kinase inhibitor; altering the lifespan of a eukaryotic organism;	486.546	300375-81-9	C25H22N6O3S	CN1N(C2=CC=CC=C2)C(=O)C(=C1C)NC3=NC4=C(C=CC=C4)N=C3N[S](=O)(=O)C5=CC=CC=C5	-6.02833	20.0868
WAY-619275	Plk1 kinase,EphB2	Cell Cycle,Protein Tyrosine Kinase	improving mRNA splicing; altering the lifespan of a eukaryotic organism; Plk1 kinase inhibitor; EphB2 inhibitor;	241.249	73663-97-5	C12H11N5O	COC1=C(NC2=C3N=C[NH]C3=NC=N2)C=CC=C1	28.2164	11.2418
Cordycepin	Others	Others	Cordycepin is an adenosine analogue, which is readily phosphorylated to its mono-, di-, and triphosphate intracellularly. It has a very potent anti-cancer, anti-oxidant and anti-inflammatory activities.	251.24	73-03-0	C10H13N5O3	NC1=NC=NC2=C1N=C[N]2C3OC(CO)CC3O	32.2709	22.7497
AX-024 HCl	CDK	Cell Cycle	AX-024 blocks the interaction of the CD3ε PRS with SH3.1(Nck).	375.86	1704801-24-0	C21H23ClFNO2_x000D_	Cl.COC1=CC2=C(OCC(=C2C3=CC=C(F)C=C3)CN4CCCC4)C=C1	5.42207	24.5811
ZM 447439	Aurora Kinase	Cell Cycle	ZM 447439 is a selective and ATP-competitive inhibitor for Aurora A and Aurora B with IC50 of 110 nM and 130 nM, respectively. It is more than 8-fold selective for Aurora A/B than MEK1, Src, Lck and has little effect against CDK1/2/4, Plk1, Chk1, etc.	513.59	331771-20-1	C29H31N5O4	COC1=C(OCCCN2CCOCC2)C=C3N=CN=C(NC4=CC=C(NC(=O)C5=CC=CC=C5)C=C4)C3=C1	9.44148	8.09589
PCI 29732	BTK	Protein Tyrosine Kinase	PCI 29732 is a selective and irreversible <b>Btk</b> inhibitor with an IC50 of 0.5 nM.	371.43	330786-25-9	C22H21N5O_x000D_	NC1=NC=NC2=C1C(=N[N]2C3CCCC3)C4=CC=C(OC5=CC=CC=C5)C=C4	16.3979	15.047
WAY-303292	B-Raf	kinase	inhibitors of B-Raf kinase	277.296	333441-11-5	C13H11NO4S	O=[S](=O)(NC1=CC=C2OCOC2=C1)C3=CC=CC=C3	10.3869	5.94588
ICCB-19 hydrochloride	RIP kinase	Apoptosis	ICCB-19 hydrochloride is an inhibitor of TNFRSF1A Associated Via Death Domain (TRADD) with IC50 of 1.12 μM and 2.01 μM for protecting Velcade-induced apoptosis in Jurkat cells and protecting RDA in MEFs, respectively. ICCB-19 indirectly inhibits Receptor-interacting serine/threonine-protein kinase 1 (RIPK1). ICCB-19 effectively induces autophagy.	291.84	1803605-68-6	C12H22ClN3OS_x000D_	Cl.O=C(CSC1=NCCN1)NC2CCCCCC2	1.20794	-27.7291
R-10015	LIM kinase	Cell Cycle	R-10015 is a potent, selective inhibitor of <b>LIM domain kinase (LIMK)</b> with IC50 of 38 nM for human LIMK1. R-10015 binds to the ATP-binding pocket and acts as a broad-spectrum antiviral compound for HIV infection.	410.86	2097938-51-5	C20H19ClN6O2_x000D_	COC(=O)C1=CC=C2N=C([NH]C2=C1)C3CCN(CC3)C4=NC=NC5=C4C(=C[NH]5)Cl	25.1138	20.8598
Remibrutinib (LOU064)	BTK	Angiogenesis	Remibrutinib (LOU064) is a potent, highly selective covalent inhibitor of bruton tyrosine kinase (BTK) with IC50 of 1.3 nM, 2.5 nM and 18 nM for BTK, FcγR-induced IL8 and anti-IgM/IL4-induced CD69, respectively. Remibrutinib (LOU064) exhibits an exquisite kinase selectivity due to binding to an inactive conformation of BTK and has the potential for the treatment of autoimmune diseases.	507.53	1787294-07-8	C27H27F2N5O3_x000D_	CN(CCOC1=C(N=CN=C1N)C2=C(C)C(=CC(=C2)F)NC(=O)C3=C(F)C=C(C=C3)C4CC4)C(=O)C=C	22.3866	11.125
WAY-299369	AR,DNA binding,GSK-3α/β,MDM4 and p53	PI3K/Akt/mTOR,Stem Cells, Wnt,Apoptosis	inhibition of AR dimerization and/or DNA binding; GSK-3α/β modulator; inhibiting interaction of MDM4 and p53;	306.744	1005078-45-4	C15H15ClN2O3	CC1=CC=CC=C1N2C(=O)C(=C(N3CCOCC3)C2=O)Cl	7.436	20.7952
AT13148	Akt,S6 Kinase,ROCK,PKA	PI3K/Akt/mTOR	AT13148 is an oral, ATP-competitive, multi-AGC kinase inhibitor with IC50 of 38 nM/402 nM/50 nM, 8 nM, 3 nM, and 6 nM/4 nM for Akt1/2/3, p70S6K, PKA, and ROCKI/II, respectively. Phase 1.	313.78	1056901-62-2	C17H16ClN3O	NCC(O)(C1=CC=C(Cl)C=C1)C2=CC=C(C=C2)C3=C[NH]N=C3	51.7393	35.7492
Demethyl-Coclaurine	Adrenergic Receptor	Endocrinology & Hormones	Demethyl-Coclaurine (Higenamine, Norcoclaurine), the key component of the Chinese herb aconite root, is a beta-2 adrenergic receptor (β2-AR) agonist. Demethyl-Coclaurine stimulates AKT phosphorylation and requires PI3K activation for the anti-apoptotic effect in cardiomyocytes.	271.31	5843-65-2	C16H17NO3_x000D_	OC1=CC=C(CC2NCCC3=CC(=C(O)C=C23)O)C=C1	29.8389	26.0798
HTH-01-015	AMPK	PI3K/Akt/mTOR	HTH-01-015 is a potent and selective NUAK1 inhibitor with IC50 of 100 nM, >100-fold selectivity over NUAK2.	468.55	1613724-42-7	C26H28N8O	CN1C(=O)C2=C(C=C3C=CC=CC3=C2)N(C)C4=NC(=NC(=C14)C)NC5=C[N](N=C5)C6CCNCC6	30.1763	23.128
WAY-630998	p38a	MAPK	inhibitor of p38a kinase	346.426	251106-30-6	C21H22N4O	O=C(N1CCN(CC1)C/C=C/C2=CC=CC=C2)C3=CC4=C([NH]C=N4)C=C3	-10.3553	-5.65577
JBJ-04-125-02	EGFR	Protein Tyrosine Kinase	(Rac)-JBJ-04-125-02 (JBJ-04-125-02 racemate) is a mutant-selective allosteric inhibitor of <b>Epidermal growth factor receptor (EGFR)</b> with potential anticancer activity.	543.61	2140807-05-0	C29H26FN5O3S_x000D_	OC1=CC=C(F)C=C1C(N2CC3=C(C=C(C=C3)C4=CC=C(C=C4)N5CCNCC5)C2=O)C(=O)NC6=NC=CS6	-34.053	-30.327
Filgotinib (GLPG0634)	JAK	JAK/STAT	Filgotinib (GLPG0634) is a selective JAK1 inhibitor with IC50 of 10 nM, 28 nM, 810 nM, and 116 nM for JAK1, JAK2, JAK3, and TYK2, respectively. Phase 2.	425.5	1206161-97-8	C21H23N5O3S	O=C(NC1=N[N]2C(=N1)C=CC=C2C3=CC=C(CN4CC[S](=O)(=O)CC4)C=C3)C5CC5	31.3467	23.5098
Palomid 529 (P529)	mTOR	PI3K/Akt/mTOR	Palomid 529 (P529) inhibits both the mTORC1 and mTORC2 complexes, reduces phosphorylation of pAktS473, pGSK3βS9, and pS6 but no effect observed on pMAPK or pAktT308. Phase 1.	406.43	914913-88-5	C24H22O6	COC1=CC=C(COC2=C(OC)C=C3C(=C2)OC(=O)C4=C3C=CC(=C4)C(C)O)C=C1	16.5048	10.3411
Aciclovir	Anti-infection	Microbiology	Aciclovir is a synthetic nucleoside analogue active against herpesviruses.	225.2	59277-89-3	C8H11N5O3	NC1=NC2=C(N=C[N]2COCCO)C(=O)N1	23.2033	0.84598
WAY-298668	Aurora-A,JAMM protease	Cell Cycle & Epigenetics	altering the lifespan of a eukaryotic organism; Aurora-A inhibitors; JAMM protease inhibitors;	405.45	371224-09-8	C22H23N5O3	CCOC1=CC2=C(C=C1)N=C(NC3=NC(CC(=O)N3)C4=CC=C(OC)C=C4)N=C2C	18.7546	14.0872
JNJ-38877618(OMO-1)	c-Met	Protein Tyrosine Kinase	JNJ-38877618 (OMO-1) is a potent, highly selective, orally bioavailable MET kinase inhibitor with binding affinity (Kd) of 1.4 nM and enzyme inhibitory activity against wt and M1268T mutant MET (2 and 3 nM IC50).	374.35	943540-74-7	C20H12F2N6_x000D_	FC(F)(C1=CC2=C(C=C1)N=CC=C2)C3=NN=C4C=CC(=N[N]34)C5=CC=NC=C5	21.0519	6.13423
WAY-345438	Casein kinase 1δ	Metabolism	Casein kinase 1δ inhibitor	413.492	571174-12-4	C24H19N3O2S	CCOC1=CC=C(C=C1)N2C(=O)C3=C(C=CC=C3)N=C2SCC4=CC=C(C=C4)C#N	11.4158	36.9719
SB505124	TGF-beta/Smad	TGF-beta/Smad	SB505124 is a selective inhibitor of TGFβR for ALK4, ALK5 with IC50 of 129 nM and 47 nM in cell-free assays, respectively, also inhibits ALK7, but does not inhibit ALK1, 2, 3, or 6.	335.4	694433-59-5	C20H21N3O2	CC1=CC=CC(=N1)C2=C(N=C([NH]2)C(C)(C)C)C3=CC4=C(OCO4)C=C3	15.3744	6.80276
CNX-774	BTK	Angiogenesis	CNX-774 is an irreversible, orally active, and highly selective BTK inhibitor with IC50 of <1 nM.	499.5	1202759-32-7	C26H22FN7O3	CNC(=O)C1=CC(=CC=N1)OC2=CC=C(NC3=NC(=C(F)C=N3)NC4=CC=CC(=C4)NC(=O)C=C)C=C2	12.2198	5.39041
Ginsenoside Rk1	others	others	Ginsenoside Rk1, one of the main elements of Sung Ginseng, has been confirmed as a new endothelial barrier enhancer recently and has anti-cancer activity.	767	494753-69-4	C42H70O12_x000D_	CC(C)=CCCC(=C)C1CCC2(C)C1C(O)CC3C4(C)CCC(OC5OC(CO)C(O)C(O)C5OC6OC(CO)C(O)C(O)C6O)C(C)(C)C4CCC23C	14.9417	-1.31477
PS48	PDK	PI3K/Akt/mTOR	PS-48 is an allosteric activator of <b>phosphoinositide-dependent protein kinase-1 (PDK1)</b>.	286.75	1180676-32-7	C17H15ClO2_x000D_	OC(=O)\C=C(\CCC1=CC=C(Cl)C=C1)C2=CC=CC=C2	-2.21413	-22.8193
Chromium picolinate	Others	Others	Chromium picolinate is a coordination complex consisting of chromium(III) and picolinic acid. It is used as a nutritional supplement for optimal insulin function in patients with Type 2 diabetes or promotion of weight loss.	418.3	14639-25-9	C18H12CrN3O6_x000D_	[Cr+3]|1|2|3(|[O-]C(=O)C4=N|1C=CC=C4)(|[O-]C(=O)C5=N|2C=CC=C5)|[O-]C(=O)C6=N|3C=CC=C6	9.94358	19.3365
WAY-616763	T. brucei and T. cruzi Phosphofructokinase	Microbiology	Inhibitor of T. brucei and T. cruzi Phosphofructokinase	440.3	735303-62-5	C18H15Cl2N3O4S	CC1=CC(=NO1)N[S](=O)(=O)C2=CC=C(NC(=O)CC3=CC(=C(Cl)C=C3)Cl)C=C2	5.65736	6.17475
Harmine hydrochloride	DYRK	Cell Cycle	Harmine, a fluorescent harmala alkaloid belonging to the beta-carboline family of compounds, is a highly cell-permeant and competitive inhibitor of ATP binding to the kinase pocket of DYRK1A, with about 60-fold higher IC50 value for DYRK2. It can also inhibit monoamine oxidases (MAOs) and cdc-like kinases (CLKs).	248.71	343-27-1	C13H13ClN2O	Cl.COC1=CC2=C(C=C1)C3=CC=NC(=C3[NH]2)C	27.8083	4.95585
Thiazovivin	ROCK	Cell Cycle	Thiazovivin is a novel ROCK inhibitor with IC50 of 0.5 μM in a cell-free assay, promotes hESC survival after single-cell dissociation.	311.36	1226056-71-8	C15H13N5OS	O=C(NCC1=CC=CC=C1)C2=CSC(=N2)NC3=CC=NC=N3	36.6922	9.03806
WAY-272130	FGFR1	Protein Tyrosine Kinase	FGFR1 inhibitors; altering the lifespan of a eukaryotic organism;	368.363	442534-83-0	C18H12N2O5S	OC(=O)C1=C(N[S](=O)(=O)C2=CC=C3NC(=O)C4=CC=CC2=C34)C=CC=C1	6.87676	23.4004
IACS-13909	phosphatase	Metabolism	IACS-13909 (BBP-398) is a specific and potent allosteric inhibitor of <b>SHP2 (Src homology 2 domain-containing phosphatase)</b> that suppresses signaling through the MAPK pathway.	377.27	2160546-07-4	C17H18Cl2N6_x000D_	CC1(N)CCN(CC1)C2=CN=C3C(=N2)[NH]N=C3C4=CC=CC(=C4Cl)Cl	0.940165	-12.3404
WAY-358667-A	Human protein kinase CK2	Metabolism	inhibitors of human protein kinase CK2; altering the lifespan of eukaryotic organisms;	244.335	182198-89-6	C12H8N2S2	SC1=NC=NC2=C1C(=CS2)C3=CC=CC=C3	16.0095	1.89735
WAY-355772	serine/threonine kinase	Apoptosis	serine/threonine kinase inhibitors	422.378	442658-33-5	C19H13F3N2O4S	FC(F)(F)OC1=CC=C(NC(=O)CN2C3=C4C(=CC=C3)C=CC=C4[S]2(=O)=O)C=C1	17.8547	18.4956
WAY-332647	pyruvate kinase	Metabolism	Inhibitors of pyruvate kinase	343.44	902516-53-4	C19H21NO3S	CCCN(CCC)C(=O)C1=CC2=C(S1)C3=CC(=CC=C3OC2=O)C	17.2658	24.8856
WAY-613473	HIV,JAK-2,PI3K	Microbiology, JAK/STAT,Epigenetics,Angiogenesis,Stem Cells,Wnt, PI3K/Akt/mTOR	inhibition of HIV-I replication; phosphatidylinositol 3-kinase inhibitors; inhibitors of the HIV-1 Nef/Hck kinase interaction; JAK-2 inhibitors;	392.431	301357-74-4	C20H16N4O3S	OC1=CC=CC(=C1)NC2=C(N[S](=O)(=O)C3=CC=CC=C3)N=C4C=CC=CC4=N2	0.930634	20.9211
WAY-333875	pyruvate kinase	Metabolism	altering the lifespan of a eukaryotic organism; pyruvate kinase activators and inhibitors;	334.776	863448-22-0	C16H16ClFN4O	CC(C)(C)[N]1N=CC2=C1N=CN(CC3=C(Cl)C=CC=C3F)C2=O	40.5182	18.6327
DMX-5084	MAP4K	Hippo	DMX-5804 is a potent, orally active and selective inhibitor of Mitogen-activated protein kinase kinase kinase kinase-4 (MAP4K4) with IC50 of 3 nM for human MAP4K4. DMX-5804 is more potent on human MAP4K4 with pIC50 of 8.55 than MINK1/MAP4K6 and TNIK/MAP4K7 with pIC50 of 8.18 and 7.96, respectively.	361.39	2306178-56-1	C21H19N3O3_x000D_	COCCOC1=CC=C(C=C1)C2=C[N](C3=CC=CC=C3)C4=C2C(=O)NC=N4	4.96738	8.96518
Berbamine	Others	Others	Berbamine has high binding affinity toward the (GGA)8 G-quadruplex. Berbamine and its derivatives are promising agents to suppress liver cancer growth by targeting CAMKII. Berbamine may be the first ATP-competitive inhibitor of CaMKII γ, could be as a new type of molecular targeted agent through inhibition of the CaMKII γ activity for treatment of leukemia. Berbamine can enhance the antitumor act…	608.723	478-61-5	C37H40N2O6	COC1=C2OC3=C4C(CC5=CC=C(O)C(=C5)OC6=CC=C(CC7N(C)CCC(=C1)C7=C2)C=C6)N(C)CCC4=CC(=C3OC)OC	8.17851	0.743612
Nazartinib (EGF816, NVS-816)	EGFR	Angiogenesis	Nazartinib (EGF816, NVS-816) is a covalent, irreversible, mutant-selective EGFR inhibitor that has nanomolar inhibitory potency against activating mt (L858R, ex19del) and T790M mt, with up to 60-fold selectivity over wild type (wt) EGFR in vitro.	495.02	1508250-71-2	C26H31ClN6O2	CN(C)C/C=C/C(=O)N1CCCCC(C1)[N]2C(=NC3=CC=CC(=C23)Cl)NC(=O)C4=CC(=NC=C4)C	15.6305	0.756251
umbralisib (TGR-1202)	PI3K	PI3K/Akt/mTOR	TGR-1202, a novel, next generation PI3Kδ inhibitor, inhibits PI3Kδ activity in enzyme and cell based assays with IC50 and EC50 values of 22.2 & 24.3 nM, respectively.	571.55	1532533-67-7	C31H24F3N5O3	CC(C)OC1=C(F)C=C(C=C1)C2=N[N](C(C)C3=C(C4=CC(=CC=C4)F)C(=O)C5=CC(=CC=C5O3)F)C6=C2C(=NC=N6)N	7.67433	-11.0631
Emavusertib (CA-4948)	IRAK	Immunology & Inflammation	Emavusertib (CA-4948) is a potent and orally bioavailable inhibitor of interleukin-1 receptor-associated kinase 4/FMS-like Tyrosine Kinase 3 (IRAK4/FLT3) with anti-tumor activity.	491.5	1801344-14-8	C24H25N7O5_x000D_	CC1=NC=CC(=C1)C2=NC(=CO2)C(=O)NC3=C(N=C4N=C(OC4=C3)N5CCOCC5)N6CCC(O)C6	19.521	-16.2855
Oridonin	Others	Others	Oridonin, a diterpenoid purified from Rabdosia rubescens, is an antitumor agent.	364.43	28957-04-2	C20H28O6	CC1(C)CCC(O)C23COC(O)(C(O)C12)C45C(O)C(CCC34)C(=C)C5=O	5.36751	-6.87856
Tofacitinib (CP-690550) Citrate	JAK	JAK/STAT	Tofacitinib citrate (CP-690550 citrate) is a novel inhibitor of JAK with IC50 of 1 nM, 20 nM and 112 nM against JAK3, JAK2, and JAK1, respectively.	504.49	540737-29-9	C22H28N6O8	CC1CCN(CC1N(C)C2=C3C=C[NH]C3=NC=N2)C(=O)CC#N.OC(=O)CC(O)(CC(O)=O)C(O)=O	20.7111	14.5767
6-(Dimethylamino)purine	Serine/threonin kina	Apoptosis	6-Dimethylaminopurine is a <b>serine threonine protein kinase</b> inhibitor. It inhibits the germinal vesicle breakdown and the meiotic maturation of oocytes.	163.18	938-55-6	C7H9N5_x000D_	CN(C)C1=NC=NC2=C1[NH]C=N2	25.0279	8.02406
WYE-175840	Glutamate Racemase,protein kinase-activated protein kinase-2	Others	Glutamate Racemase inhibitor; mitogen activated protein kinase-activated protein kinase-2 inhibitor;	373.429	380432-29-1	C17H19N5O3S	CN1N(C(=O)C(=C1C)N[S](=O)(=O)C2=CC(=C(N)C=C2)N)C3=CC=CC=C3	-17.688	7.51742
WAY-313318	RSK2	PI3K/Akt/mTOR	RSK2 inhibitors	293.151	351993-88-9	C13H10Cl2N4	ClC1=CC=CC(=C1Cl)NC[N]2N=NC3=C2C=CC=C3	12.6411	16.6582
WYE-175829	tyrosine kinase,gonadotropin-releasing hormone	tyrosine kinase,Endocrinology & Hormones	inhibitor of tyrosine kinases; gonadotropin-releasing hormone antagonist;	278.327	327093-01-6	C13H14N2O3S	COC1=C(N[S](=O)(=O)C2=CC(=CC=C2)N)C=CC=C1	-11.2617	7.11777
WAY-606958	Casein kinase 1δ	Metabolism	Casein kinase 1δ inhibitors	385.462	882220-11-3	C23H23N5O	COC1=CC=C(C=C1)C2=N[N](C3=CC=CC=C3)C(=C2)C4=NN=C5CCCCC[N]45	-9.73168	35.1316
WAY-298516	Androgen Receptor,RAD51,GSK-3	Endocrinology & Hormones, PI3K/Akt/mTOR,Stem Cells ,Wnt	modulating rad51; Androgen Receptor modulator; RAD51 inhibitors; antinociceptive activity; RAD51 Inhibitor; GSK-3a/b modulator; cell growth inhibitors; altering the lifespan of a eukaryotic organism; modulating RAD51; Antinociceptive properties;	292.718	103056-35-5	C14H13ClN2O3	ClC1=C(N2CCOCC2)C(=O)N(C1=O)C3=CC=CC=C3	22.4177	8.95417
MBQ-167	Rho	Cell Cycle	MBQ-167 is a potent and dual inhibitor of <b>Rac</b> and <b>Cdc42</b> with <b>IC50s</b> of 103 nM and 78 nM respectively, in metastatic breast cancer cells.	338.41	2097938-73-1	C22H18N4	CC[N]1C2=C(C=CC=C2)C3=CC(=CC=C13)[N]4N=NC=C4C5=CC=CC=C5	58.9483	14.712
GSK8612	Serine/threonin kina	Apoptosis	GSK8612 is a highly potent and selective inhibitor for TBK1 (Tank-binding Kinase-1) with pKd of 8.0. Within 10-fold affinity with respect to TBK1, no off-targets of GSK8612 could be identified.	520.33	2361659-62-1	C17H17BrF3N7O2S_x000D_	CC1=N[N](CC(F)(F)F)C=C1NC2=NC=C(Br)C(=N2)NCC3=CC=C(C=C3)[S](N)(=O)=O	21.4817	12.6887
Semaxanib (SU5416)	VEGFR	Protein Tyrosine Kinase	Semaxanib (SU5416) is a potent and selective VEGFR(Flk-1/KDR) inhibitor with IC50 of 1.23 μM, 20-fold more selective for VEGFR than PDGFRβ, lack of activity against EGFR, InsR and FGFR. Phase 3.	238.28	194413-58-6	C15H14N2O	CC1=CC(=C([NH]1)/C=C/2C(=O)NC3=CC=CC=C23)C	33.2571	-6.05538
WAY-278459-A	Plasmodium falciparum Apical Membrane Antigen 1,Hec1,α7 nicotinic acetylcholine receptor,glucokinase,HDAC	DNA Damage ,Epigenetics, NF-κB	inhibitors of wild type and mutant HIV-1 reverse transcriptase; Inhibitors of Plasmodium falciparum Apical Membrane Antigen 1; glucose uptake activators; modulators of Hec1 activity; modulators of HEC1 activity; diacylglycerol acyltransferase inhibitors; α7 nicotinic acetylcholine receptor ligands; α7 nicotinic acetylcholine receptor ligands; α7 nicotinic acetylcholine receptor ligands; glucokina…	220.291	105512-88-7	C11H12N2OS	COC1=CC=C(C=C1)C2=C(C)SC(=N2)N	26.5892	29.3957
BMS-911543	JAK	JAK/STAT	BMS-911543 is a potent and selective inhibitor of JAK2 with IC50 of 1.1?nM, ~350-, 75- and 65-fold selective to JAK1, JAK3 and TYK2, respectively. Phase 1/2.	432.52	1271022-90-2	C23H28N8O	CC[N]1C(=CC2=C1N=C(NC3=N[N](C)C(=C3)C)C4=C2[N](C)C=N4)C(=O)N(C5CC5)C6CC6	31.3259	34.9717
GCN2iB	Serine/threonin kinase	Metabolism	GCN2iB is an ATP-competitive serine/threonine-protein kinase general control nonderepressible 2 (GCN2) inhibitor with IC50 of 2.4 nM.	451.83	2183470-12-2	C18H12ClF2N5O3S_x000D_	COC1=NC=C(Cl)C=C1[S](=O)(=O)NC2=C(F)C(=C(F)C=C2)C#CC3=CN=C(N)N=C3	11.8829	9.75966
Melatonin	MT Receptor	GPCR & G Protein	Melatonin is a MT receptor agonist, used as a dietary supplement.	232.28	73-31-4	C13H16N2O2	COC1=CC2=C([NH]C=C2CCNC(C)=O)C=C1	13.3513	3.05427
WAY-607324	Mcl-1,ASK1	Apoptosis	inhibitors of Mcl-1; ASK1 inhibitor;	288.345	1427537-92-5	C13H8N2O2S2	O=C/1N(C(=S)SC1=C/C2=CC=CO2)C3=CN=CC=C3	-2.59682	26.2392
WAY-313218	11β-HSD1	others	11β-hydroxysteroid dehydrogenase type 1 modulator; inhibitor of p38a kinase;	297.367	260428-69-1	C19H20FNO	FC1=CC=C(C=C1)C(=O)N2CCC(CC2)CC3=CC=CC=C3	19.9319	30.6422
WAY-329424	Abl	Angiogenesis	ABL kinase inhibiting activities	405.489	943933-52-6	C24H27N3O3	CCOCCCNC(=O)C1C(N(C)C(=O)C2=CC=CC=C12)C3=C[NH]C4=C3C=CC=C4	-8.83661	22.1673
ZCL278	Rho	Cell Cycle	ZCL278 is a selective Cdc42 GTPase inhibitor with Kd of 11.4 μM.	584.89	587841-73-4	C21H19BrClN5O4S2	CC1=CC(=NC(=N1)N[S](=O)(=O)C2=CC=C(NC(=S)NC(=O)COC3=C(Cl)C=C(Br)C=C3)C=C2)C	3.99482	27.3993
Senkyunolide I	ERK	MAPK	Senkyunolide I (SEI, SENI) is an orally active compound isolated from Ligusticum chuanxiong with analgesic, anti-migraine, neuroprotective, anti-oxidation and anti-apoptosis activities. Senkyunolide I (SEI, SENI) up-regulates the phosphorylation of Erk1/2 and induces Nrf2 nuclear translocation with enhanced HO-1 and NQO1 expressions. Senkyunolide I (SEI, SENI) promotes the ratio of Bcl-2/Bax and …	224.25	94596-28-8	C12H16O4_x000D_	CCC\C=C1/OC(=O)C2=C1CCC(O)C2O	13.2328	14.0293
Wogonin	CDK,Transferase	Cell Cycle	Wogonin, a natural and biologically-active flavonoid found in plants, is an inhibitor of CDK9 and does not inhibit CDK2, CDK4 and CDK6 at doses that inhibit CDK9 activity Also inhibits N-acetyltransferase.	284.26	632-85-9	C16H12O5	COC1=C(O)C=C(O)C2=C1OC(=CC2=O)C3=CC=CC=C3	7.73853	12.3378
UNC2881	TAM Receptor	Protein Tyrosine Kinase	UNC2881 is a specific Mer tyrosine kinase inhibitor with IC50 of 4.3 nM, about 83- and 58-fold selectivity over Axl and Tyro3, respectively.	463.58	1493764-08-1	C25H33N7O2	CCCCNC1=NC(=C(C=N1)C(=O)NCC2=CC=C(C=C2)[N]3C=CN=C3)NC4CCC(O)CC4	30.142	6.51444
WAY-113178	IkB kinase-beta	others	IkB kinase-beta (IKKb) inhibitors	391.443	638999-98-1	C21H17N3O3S	COC(=O)C1=C(NC(=O)C2=CC3=C(S2)[N](N=C3C)C4=CC=CC=C4)C=CC=C1	6.2319	17.4986
S-Ruxolitinib (INCB018424)	JAK	JAK/STAT	S-Ruxolitinib is the chirality of INCB018424, which is the first potent, selective, JAK1/2 inhibitor to enter the clinic with IC50 of 3.3 nM/2.8 nM, >130-fold selectivity for JAK1/2 versus JAK3. Phase 3.	306.37	941685-37-6	C17H18N6	N#CCC(C1CCCC1)[N]2C=C(C=N2)C3=NC=NC4=C3C=C[NH]4	58.4145	4.23581
YM201636	PI3K	PI3K/Akt/mTOR	YM201636 is a selective PIKfyve inhibitor with IC50 of 33 nM, less potent to p110α and insensitive to Fabl (yeast orthologue).	467.48	371942-69-7	C25H21N7O3	NC1=CC=C(C=N1)C(=O)NC2=CC=CC(=C2)C3=NC(=C4OC5=NC=CC=C5C4=N3)N6CCOCC6	20.8268	13.5392
WAY-232261	PI3K	PI3K/Akt/mTOR	PI3 kinase inhibitors	292.334	332023-13-9	C14H20N4O3	[O-][N+](=O)C1=CC=C(C=C1N2CCOCC2)N3CCNCC3	18.5436	21.8897
WAY-632896	CDK9,GSK-3	Cell Cycle, PI3K/Akt/mTOR, Stem Cells , Wnt	Mimetic CDK9 Inhibitors; altering the lifespan of a eukaryotic organism; GSK-3 inhibitor; GSK-3 inhibitor;	271.338	784170-07-6	C14H13N3OS	CC1=CN=C(NC(=O)CC2=C[NH]C3=C2C=CC=C3)S1	12.5492	-12.8713
WAY-322475	GRK6,SUMOylation	Ubiquitin	GRK6 inhibitor; SUMOylation inhibitor;	265.313	300731-73-1	C15H15N5	CCCC[N]1C(=C(C#N)C2=NC3=CC=CC=C3N=C12)N	-2.51446	23.2976
WAY-607777	Casein kinase 1d	Metabolism	Casein kinase 1d inhibitor	377.868	522626-08-0	C16H12ClN3O2S2	ClC1=C(C=CC=C1)C(NC2=CC=NC=C2)=N[S](=O)(=O)C3=CC=CS3	-11.2156	-8.45157
SU5205	VEGFR	Protein Tyrosine Kinase	SU5205 is an inhibitor of <b>VEGF receptor 2 (VEGFR2/FLK-1)</b> with IC50 of 9.6 µM.	239.24	3476-86-6	C15H10FNO_x000D_	FC1=CC=C(C=C1)/C=C/2C(=O)NC3=CC=CC=C23	-3.11118	2.47057
acalisib (GS-9820)	PI3K	PI3K/Akt/mTOR	acalisib (GS-9820) is a highly selective and potent <b>p110δ</b> inhibitor (IC50 = 14 nM) with 114- to 400-fold selectivity over the other class I PI3K enzymes and no activity against Class II and III PI3K family members or other PI3K-related proteins including mTOR and DNA-PK.	401.4	870281-34-8	C21H16FN7O	CC(NC1=NC=NC2=C1[NH]C=N2)C3=NC4=C(C=C(F)C=C4)C(=O)N3C5=CC=CC=C5	21.3392	13.7125
GNE-0877	LRRK2	Autophagy	GNE-0877 is a highly potent and selective leucine-rich repeat kinase 2 (LRRK2) inhibitor with Ki of 0.7 nM.	339.32	1374828-69-9	C14H16F3N7	CNC1=NC(=NC=C1C(F)(F)F)NC2=C[N](N=C2C)C(C)(C)C#N	26.9416	12.4155
WAY-630363	Casein kinase 1δ	Metabolism	Casein kinase 1δ inhibitors	365.406	729579-66-2	C19H15N3O3S	O=C(COC1=C2C(=NC=N1)SC=C2C3=CC=CC=C3)NCC4=CC=CO4	-7.43548	-5.94874
ZM 323881 HCl	VEGFR	Protein Tyrosine Kinase	ZM 323881 is a potent and selective VEGFR2 inhibitor with IC50 of <2 nM, almost no activity on VEGFR1, PDGFRβ, FGFR1, EGFR and ErbB2.	411.86	193000-39-4	C22H19ClFN3O2	Cl.CC1=CC(=C(NC2=C3C=CC(=CC3=NC=N2)OCC4=CC=CC=C4)C=C1O)F	0.112272	6.32713
WAY-270318	protein kinase	others	altering the lifespan of a eukaryotic organism; inhibitor of protein kinases;	286.352	721964-48-3	C14H14N4OS	CCOC1=CC=C(C=C1)C2=NN=C3C=CC(=N[N]23)SC	11.1339	28.5895
AZD7762	Chk	Cell Cycle	AZD7762 is a potent and selective inhibitor of Chk1 with IC50 of 5 nM in a cell-free assay. It is equally potent against Chk2 and less potent against CAM, Yes, Fyn, Lyn, Hck and Lck. Phase 1.	362.42	860352-01-8	C17H19FN4O2S	NC(=O)NC1=C(SC(=C1)C2=CC(=CC=C2)F)C(=O)NC3CCCNC3	18.2145	27.5718
WAY-625741	Casein kinase 1d	Metabolism	Casein kinase 1d inhibitors; Casein kinase 1d inhibitors; altering the lifespan of a eukaryotic organism;	343.357	756857-71-3	C16H13N3O4S	O=C(COC1=C2C=CSC2=NC=N1)NC3=CC4=C(OCCO4)C=C3	8.7243	24.6767
Derazantinib(ARQ-087)	FGFR	Protein Tyrosine Kinase	Derazantinib(ARQ-087) is an orally bioavailable inhibitor of the <b>fibroblast growth factor receptor (FGFR)</b> with IC50 values of 1.8 nM for FGFR2, and 4.5 nM for FGFR1 and 3, showing lower potency for FGFR4 (IC50=34 nM). It also inhibits RET, DDR2, PDGFRβ, VEGFR and KIT.	468.57	1234356-69-4	C29H29FN4O	COCCNCCC1=CC(=CC=C1)NC2=NC3=C(CC(C4=CC=CC=C4F)C5=C3C=CC=C5)C=N2	21.6408	15.9481
WAY-329592	tyrosine kinase	Protein Tyrosine Kinase	Tyrosine kinase inhibitory activity	493.414	868963-53-5	C22H25BrN2O4S	CC1CC2=CC(=CC(=C2N1C(C)=O)[S](=O)(=O)CCC(=O)NC3=CC(=C(C)C=C3)C)Br	0.412365	23.2115
WAY-637493	Fyn	Angiogenesis	Fyn kinase inhibitor	334.329	791600-64-1	C18H14N4O3	NC1=C(C(=O)CN1C2=CC3=C(OCO3)C=C2)C4=NC5=C([NH]4)C=CC=C5	15.5703	1.1818
Tyrphostin AG-528	EGFR	Protein Tyrosine Kinase	Tyrphostin AG-528 is a potent inhibitor of <b>epidermal growth factor receptors (EGFR)</b> and <b>ErbB2/HER2</b> with IC50 of 4.9 μM and 2.1 μM, respectively. Tyrphostin AG-528 exhibits anticancer activity.	306.32	133550-49-9	C18H14N2O3_x000D_	OC1=C(O)C=C(C=C1)/C=C(C#N)/C(=O)N2CCC3=C2C=CC=C3	-16.8275	12.4425
BO-264	TACC3	Cytoskeletal Signaling	BO-264 is a potent and orally active inhibitor of transforming acidic coiled-coil 3 (TACC3) with IC50 of 188 nM and Kd of 1.5 nM. BO-264 specifically blocks the function of FGFR3-TACC3 fusion protein. BO-264 induces SAC-dependent mitotic arrest, apoptosis and DNA damage with antitumor activities.	353.38	2408648-20-2	C18H19N5O3_x000D_	COC1=CC=C(C=C1)C2=NOC(=C2)NC3=NC(=NC=C3)N4CCOCC4	12.7518	19.3169
NU2058	CDK	Cell Cycle	NU2058 is an inhibitor of CDK2 with IC50 value of 17 μM in an isolated enzyme assay. It also potentiates melphalan (DMF 2.3), and monohydroxymelphalan (1.7), but not temozolomide or ionising radiation.	247.30	161058-83-9	C12H17N5O	NC1=NC2=C(N=C[NH]2)C(=N1)OCC3CCCCC3	15.8533	5.02416
TG101209	c-RET,FLT3,JAK	JAK/STAT	TG101209 is a selective JAK2 inhibitor with IC50 of 6 nM, less potent to Flt3 and RET with IC50 of 25 nM and 17 nM in cell-free assays, ~30-fold selective for JAK2 than JAK3, sensitive to JAK2V617F and MPLW515L/K mutations.	509.67	936091-14-4	C26H35N7O2S	CN1CCN(CC1)C2=CC=C(NC3=NC=C(C)C(=N3)NC4=CC(=CC=C4)[S](=O)(=O)NC(C)(C)C)C=C2	6.43371	32.2571
WAY-650334	MAP2K4	others	MAP2K4 inhibitor	232.235	847773-02-8	C12H12N2O3	CCN1C(=O)C(=NC2=CC(=CC=C12)C(O)=O)C	-10.1612	0.843442
Briciclib	Others	Others	Briciclib is a water soluble derivative of ON-013100, a small molecule that binds to and inhibits eukaryotic translation initiation factor 4E (eIF4E) .	474.42	865783-99-9	C19H23O10PS_x000D_	COC1=CC(=C(/C=C/[S](=O)(=O)CC2=CC=C(OC)C(=C2)O[P](O)(O)=O)C(=C1)OC)OC	11.2388	13.8347
Salirasib	Rho	Cell Cycle	Salirasib is a potent competitive prenylated protein methyltransferase (PPMTase) inhibitor with Ki of 2.6 μM, which inhibits Ras methylation. Phase 2.	358.54	162520-00-5	C22H30O2S	CC(C)=CCC/C(C)=C/CC/C(C)=C/CSC1=CC=CC=C1C(O)=O	18.0814	7.76329
WAY-606957	GSK3	PI3K/Akt/mTOR & Stem Cells & Wnt	inhibitor of GSK3 kinases	308.378	1062138-03-7	C18H20N4O	CC1=N[NH]C2=C1C(C3=CC=NC=C3)C4=C(CC(C)(C)CC4=O)N2	-16.6939	16.599
ULK-101	Autophagy	Autophagy	ULK-101 is a potent and selective <b>ULK1</b> inhibitor with IC50 values of 8.3 nM and 30 nM for ULK1 and ULK2, respectively.	460.45	No CAS	C22H16F4N4OS	FC1=CC=C(C=C1)C2=C[N]3N=CC(=C3N=C2)C4=CSC(=C4)C(=O)NC(C5CC5)C(F)(F)F	40.21	27.6108
WAY-321366	tyrosine kinase	others	abelson tyrosine kinase inhibitor; altering the lifespan of a eukaryotic organism;	379.796	370854-75-4	C20H14ClN3O3	ClC1=CC=C(CC(=O)NC2=CC=C(C=C2)C3=NN=C(O3)C4=CC=CO4)C=C1	-1.71094	18.2478
WAY-354189	JAK-STAT	JAK/STAT	JAK-STAT inhibitor	387.238	850019-35-1	C15H12Cl2N2O4S	NC(=O)C1=C(NC(=O)COC(=O)CC2=C(Cl)C=CC=C2Cl)SC=C1	8.71065	14.9442
WAY-647766	Casein kinase 1δ	Metabolism	Casein kinase 1δ inhibitors	320.372	851168-98-4	C16H12N6S	C[N]1N=NN=C1SC2=C3C=CC=CC3=NC(=N2)C4=CC=CC=C4	-9.36088	14.0664
20S-Ginsenoside Rh2	Cancer	Apoptosis,Caspase	Ginsenoside Rh2 is isolated from the root of Ginseng. Ginsenoside Rh2 induces the activation of caspase-8 and caspase-9. Ginsenoside Rh2 induces cancer cell apoptosis in a multi-path manner.	622.873	78214-33-2	C36H62O8	CC(C)=CCCC(C)(O)C1CCC2(C)C1C(O)CC3C4(C)CCC(OC5OC(CO)C(O)C(O)C5O)C(C)(C)C4CCC23C	18.4131	1.43524
WAY-633334	Casein kinase 1δ	Metabolism	Casein kinase 1δ inhibitor; Casein kinase 1δ inhibitor; altering the lifespan of a eukaryotic organism;	301.363	757224-44-5	C15H15N3O2S	C[N]1C(=CC(=C1C)C(=O)COC2=C3C=CSC3=NC=N2)C	-25.1559	-7.48057
AZD8330	MEK	MAPK	AZD8330 is a novel, selective, non-ATP competitive MEK 1/2 inhibitor with IC50 of 7 nM. Phase 1.	461.23	869357-68-6	C16H17FIN3O4	CN1C(=O)C(=CC(=C1NC2=C(F)C=C(I)C=C2)C(=O)NOCCO)C	26.8665	7.1918
Decursin	Immunology & Inflammation related	Immunology & Inflammation	Decursin (D), purified from <i>Angelica gigas Nakai</i>, shows potential anti-inflammatory activity and neuroprotective property.	328.36	5928-25-6	C19H20O5_x000D_	CC(C)=CC(=O)OC1CC2=C(OC1(C)C)C=C3OC(=O)C=CC3=C2	9.44342	12.8581
WAY-329423	Abl	Angiogenesis	ABL kinase inhibiting activities	389.49	943933-49-1	C24H27N3O2	CC(C)CCNC(=O)C1C(N(C)C(=O)C2=CC=CC=C12)C3=C[NH]C4=C3C=CC=C4	-11.2748	24.9824
WAY-300700	HIV-1	PI3K/Akt/mTOR	HIV-1 non-nucleoside reverse transcriptase inhibitors	310.39	428853-17-2	C19H22N2O2	COC1=CC=C(NC(=O)CCN2CCC3=C(C2)C=CC=C3)C=C1	10.0973	-1.33998
WAY-248134	LIMK1，IKKβ	NF-κB	LIMK1 inhibitor; IKKβ inhibitor; IkB kinase β inhibitor;	221.279	67795-42-0	C10H11N3OS	CC1=NC2=C(C(=C1)C)C(=C(S2)C(N)=O)N	23.67	28.053
WAY-603610	GSK3	PI3K/Akt/mTOR,Stem Cells,Wnt	inhibitors of GSK3 kinases	313.417	380450-97-5	C17H19N3OS	CC1=N[NH]C2=C1C(C3=CSC=C3)C4=C(CC(C)(C)CC4=O)N2	-5.19044	10.1899
WAY-607738	Mcl-1,mitogen-activated protein kinase phosphatase-1	Apoptosis	inhibitors of Mcl-1; altering the lifespan of a eukaryotic organism; mitogen-activated protein kinase phosphatase-1 inhibitory activity;	434.402	522624-94-8	C22H18N4O6	CN1C(=C(C(=O)COC(=O)C2=C3C=CC=CC3=NC(=C2)C4=CC=CO4)C(=O)N(C)C1=O)N	7.80965	-28.2342
ML347	TGF-beta/Smad,ALK	TGF-beta/Smad	ML347 is a selective BMP receptor inhibitor with IC50 of 32 nM for ALK2, >300-fold selectivity over ALK3. Also inhibits ALK1 activity with IC50 of 46 nM.	352.39	1062368-49-3	C22H16N4O	COC1=CC=C(C=C1)C2=C[N]3N=CC(=C3N=C2)C4=CC=CC5=C4C=CC=N5	24.8587	5.05076
1-Naphthyl PP1(1-NA-PP1)	Src	Angiogenesis	1-Naphthyl PP1(1-NA-PP 1) is a highly selective and potent <b>pan-PKD</b> inhibitor with IC50 of 154.6 nM,133.4 nM and 109.4 nM for PKD1, PKD2 and PKD3, respectively. 1-Naphthyl PP1 is a selective inhibitor of <b>Src family kinases (v-Src, c-Fyn)</b> and <b>the tyrosine kinase c-Abl</b> with IC50 of 1.0 μM, 0.6 μM, 0.6 μM, 18 μM and 22 μM for v-Src, c-Fyn, c-Abl, CDK2 and CAMK II, respectively.	317.39	221243-82-9	C19H19N5_x000D_	CC(C)(C)[N]1N=C(C2=CC=CC3=C2C=CC=C3)C4=C1N=CN=C4N	13.5023	18.253
JANEX-1	JAK	JAK/STAT	JANEX-1 is a small molecule inhibitor of <b>JAK3</b> that selectively inhibits JAK3 at an IC50 of 78 µM without altering the activity of JAK1 or JAK2, or any other protein tyrosine kinases (IC50 ≥ 350 µM).	297.31	202475-60-3	C16H15N3O3	COC1=C(OC)C=C2C(=NC=NC2=C1)NC3=CC=C(O)C=C3	22.257	12.784
WAY-310944	Mycobacterium tuberculosis shikimate kinase	Microbiology	Mycobacterium tuberculosis shikimate kinase inhibitors; altering the lifespan of eukaryotic organisms;	266.339	688335-53-7	C11H10N2O2S2	OC(=O)CSC1=NC=NC2=C1C3=C(CCC3)S2	26.1825	9.03692
3-Methyladenine (3-MA)	Autophagy,PI3K	PI3K/Akt/mTOR	3-Methyladenine (3-MA) is a selective PI3K inhibitor for Vps34 and PI3Kγ with IC50 of 25 μM and 60 μM in HeLa cells blocks class I PI3K consistently, whereas suppression of class III PI3K is transient, and also blocks autophagosome formation.	149.15	5142-23-4	C6H7N5	C[N]1C=NC(=C2N=CN=C12)N	3.84397	9.16282
Nifuroxazide	STAT	JAK/STAT	Nifuroxazide is a cell-permeable and orally available nitrofuran-based antidiarrheal agent that effectively suppresses the activation of cellular STAT1/3/5 transcription activity with IC50 of 3 μM against IL-6-induced STAT3 activation in U3A cells.	275.22	965-52-6	C12H9N3O5	OC1=CC=C(C=C1)C(=O)N/N=C/C2=CC=C(O2)[N+]([O-])=O	35.2025	5.82035
Apcin	E3 Ligase	Ubiquitin	Apcin (APC inhibitor) is an inhibitor of the E3 ligase activity of the mitotic anaphase-promoting complex/cyclosome (APC/C) that binds to Cdc20 and competitively inhibits the ubiquitylation of D-box-containing substrates.	438.65	300815-04-7	C13H14Cl3N7O4_x000D_	CC1=NC=C([N]1CCOC(=O)NC(NC2=NC=CC=N2)C(Cl)(Cl)Cl)[N+]([O-])=O	9.04492	-2.26145
WAY-357919	VEGFR	Protein Tyrosine Kinase	inhibitor of vascular endothelial growth factor receptor-2	324.397	298207-77-9	C18H16N2O2S	CC(=O)C1=CC=CC(=C1)OC2=NC=NC3=C2C4=C(CCCC4)S3	0.783524	-2.08708
PF-543	S1P Receptor	GPCR & G Protein	PF-543, a novel sphingosine-competitive inhibitor of SphK1, inhibits SphK1 with IC50 and Ki of 2.0 nM and 3.6 nM, exhibits >100-fold selectivity over the SphK2 isoform.	502.07	1415562-82-1(free base)	C27H31NO4S	CC1=CC(=CC(=C1)OCC2=CC=C(CN3CCCC3CO)C=C2)C[S](=O)(=O)C4=CC=CC=C4	26.8945	20.6551
Amarogentin	Taste Receptor. TNF-alpha. Apoptosis related. PI3K. Akt. AMPK	GPCR & G Protein	Amarogentin (AG), a secoiridoid glycoside mainly extracted from <i>Swertia</i> and <i>Gentiana</i> roots, exhibits anti-oxidative, anti-tumour, and anti-diabetic activities. Amarogentin is an agonist for the bitter taste receptor <b>TAS2R1</b> and inhibits in LAD-2 cells substance P-induced production of newly synthesized <b>TNF-&alpha;</b>. Amarogentin induces <b>apoptosis</b> in human gastric c…	586.54	21018-84-8	C29H30O13_x000D_	OCC1OC(OC2OC=C3C(CCOC3=O)C2C=C)C(OC(=O)C4=C(O)C=C(O)C=C4C5=CC=CC(=C5)O)C(O)C1O	24.3395	2.82688
Src Inhibitor 1	Src	Angiogenesis	Src Inhibitor 1 is a potent competitive inhibitor of both Src and Lck (IC50 = 44 and 88 nM, respectively), as well as Csk and Yes.	373.4	179248-59-0	C22H19N3O3_x000D_	COC1=CC2=NC=NC(=C2C=C1OC)NC3=CC=C(OC4=CC=CC=C4)C=C3	47.393	2.85861
Palmitoleic acid	AMPK	PI3K/Akt/mTOR	Palmitoleic acid (POA, Palmitoleate) stimulates the uptake of glucose in liver through activation of <b>AMPK</b> and <b>FGF-21</b>, dependent on PPAR&alpha;.</p>	254.41	373-49-9	C16H30O2_x000D_	CCCCCC\C=C/CCCCCCCC(O)=O	11.8083	11.4203
Atractylenolide II	STAT3	Others	Atractylenolide II has antimelanoma effect by inhibiting STAT3 signalling. Atractylenolide II has cytotoxic/apoptotic effects may via p38 activation ,ERK and Akt inactivation, p53 dependent. Atractylenolide II can inhibit platelets activities and thrombus formation. Atractylenolide II has antiinflammatory activity.	232.318	73069-14-4	C15H20O2	CC1=C2CC3C(=C)CCCC3(C)CC2OC1=O	16.0865	11.4141
WHI-P154	EGFR,JAK	JAK/STAT	WHI-P154 is a potent JAK3 inhibitor with IC50 of 1.8 μM, no activity against JAK1 or JAK2, also inhibits EGFR, Src, Abl, VEGFR and MAPK, prevents Stat3, but not Stat5 phosphorylation.	376.2	211555-04-3	C16H14BrN3O3	COC1=CC2=NC=NC(=C2C=C1OC)NC3=CC=C(O)C(=C3)Br	8.55084	19.376
WAY-270966	p38	MAPK	p38 MAP Kinase inhibitor	408.336	421578-44-1	C16H14BrN3OS2	CCC1=CC2=C(S1)N=CN=C2SCC(=O)NC3=CC=C(Br)C=C3	-1.65363	28.1972
Curculigoside	Immunology & Inflammation related	Immunology & Inflammation	Curculigoside, a diterpenoid triepoxide, is one of the main bioactive phenolic compounds isolated from the rhizome of Curculigo orchioides Gaertn. and has potent antioxidant, anti-osteoporotic, immunomodulatory, and neuroprotective effects.	466.44	85643-19-2	C22H26O11	COC1=C(C(=O)OCC2=CC(=CC=C2OC3OC(CO)C(O)C(O)C3O)O)C(=CC=C1)OC	17.1479	18.2831
BI 2536	PLK	Cell Cycle	BI2536 is a potent Plk1 inhibitor with IC50 of 0.83 nM in a cell-free assay. It shows 4- and 11-fold greater selectivity against Plk2 and Plk3. Phase 2.	521.66	755038-02-9	C28H39N7O3	CCC1N(C2CCCC2)C3=NC(=NC=C3N(C)C1=O)NC4=CC=C(C=C4OC)C(=O)NC5CCN(C)CC5	27.3206	-19.0918
WAY-271147	VEGFR	Protein Tyrosine Kinase ,Angiogenesis	VEGFR inhibitor; angiogenesis inhibitor;	308.288	683235-34-9	C17H12N2O4	CC(=O)C1=CC=C(C=C1)C(=O)NC2=CC3=C(C=C2)C(=O)NC3=O	-0.123086	28.7177
SU5614	VEGFR	Protein Tyrosine Kinase	SU5416 (Chloro-SU5416, Chloro-Semaxanib) is a small molecule receptor tyrosine kinases (RTK) inhibitor of VEGFR-2, c-kit, and both wild-type and mutant FLT3. SU5416 also inhibits RET with IC50 of 170 nM. SU5416 reduces cell proliferation and induces apoptosis.	272.73	1055412-47-9	C15H13ClN2O_x000D_	CC1=CC(=C([NH]1)/C=C/2C(=O)NC3=CC=C(Cl)C=C23)C	6.35952	21.459
Rhoifolin	Others	Cancer	Rhoifolin is extracted from Turpinia arguya Seem dried leaves.	578.519	17306-46-6	C27H30O14	CC1OC(OC2C(O)C(O)C(CO)OC2OC3=CC4=C(C(=C3)O)C(=O)C=C(O4)C5=CC=C(O)C=C5)C(O)C(O)C1O	0.193567	11.6498
TCS PIM-1 1	Pim	JAK/STAT	TCS PIM-1 1 is a potent and selective inhibitor of <b>ATP-competitive Pim-1 kianse</b> with IC50 of 50 nM, shows good selectivity over Pim-2 and MEK1/MEK2 with IC50 > 20000 nM.	367.2	491871-58-0	C18H11BrN2O2_x000D_	OC1=CC=C(Br)C=C1C2=CC(=C(C#N)C(=O)N2)C3=CC=CC=C3	-4.78791	26.7953
WAY-321873	GATA4-NKX2-5,AKT	PI3K/Akt/mTOR	modulator of GATA4-NKX2-5 transcriptional synergy ; AKT inhibitor; pleckstrin homology domain inhibitors; Inhibitor of the Pleckstrin Homology Domain of Protein Kinase B/AKT;	435.456	547704-53-0	C21H17N5O4S	CC1=C(C(=O)NC2=CC=C(C=C2)[S](=O)(=O)NC3=NC=CC=N3)C(=NO1)C4=CC=CC=C4	-6.67731	26.965
Atractylenolide I	Immunology & Inflammation related	Immunology & Inflammation	Atractylenolide I is the major sesquiterpenoid of the rhizome of A. macrocephala and shows a wide spectrum of pharmacological activities such as antiinflammatory, digestion promoting, and antioxidant effects.	230.3	73069-13-3	C15H18O2	CC1=C2CC3C(=C)CCCC3(C)C=C2OC1=O	15.1502	19.3523
WAY-662864	UMPK	Others	uridine monophosphate kinase (UMPK) inhibitor	370.424	1621866-83-8	C15H22N4O5S	OC(=O)C1CCN(CC1)C(=O)CSC2=NNC(=O)N2CC3CCCO3	5.14565	15.9077
Lapatinib (GW-572016) Ditosylate	EGFR,HER2	Protein Tyrosine Kinase	Lapatinib (GW-572016) Ditosylate is a potent EGFR and ErbB2 inhibitor with IC50 of 10.8 and 9.2 nM in cell-free assays, respectively.	925.46	388082-77-7	C43H42ClFN4O10S3	CC1=CC=C(C=C1)[S](O)(=O)=O.CC2=CC=C(C=C2)[S](O)(=O)=O.C[S](=O)(=O)CCNCC3=CC=C(O3)C4=CC=C5N=CN=C(NC6=CC=C(OCC7=CC=CC(=C7)F)C(=C6)Cl)C5=C4	11.9248	-10.9598
Methyl cinnamate	Others	Others	Methyl cinnamate is the methyl ester of cinnamic acid found naturally in a variety of plants. It could be used in the flavor and perfume industries.	162.19	103-26-4	C10H10O2_x000D_	COC(=O)/C=C/C1=CC=CC=C1	-1.21222	9.44732
WAY-320080	glucokinase,heat shock protein 90	others	glucokinase activators; inhibitors of heat shock protein 90 ;	287.337	349549-38-8	C14H13N3O2S	CCC1=C(O)C=C(O)C(=C1)C2=N[NH]C=C2C3=CSC=N3	17.8635	-7.87043
AZD3759	EGFR	Protein Tyrosine Kinase	AZD3759 is a potent, oral active, CNS-penetrant EGFR inhibitor with IC50 of 0.3 nM, 0.2 nM, and 0.2 nM for EGFR (WT), EGFR (L858R), and EGFR (exon 19Del), respectively. Phase 1.	459.9	1626387-80-1	C22H23ClFN5O3	COC1=C(OC(=O)N2CCN(C)CC2C)C=C3C(=NC=NC3=C1)NC4=CC=CC(=C4F)Cl	-3.29756	-4.63487
CRT0066101	Serine/threonin kinase,CaMK	Apoptosis	CRT0066101 is a small molecule PKD family specific inhibitor which specifically blocks PKD1/2 activity and does not suppress PKCα/PKCβ/PKCε activity in multiple.	411.33	1883545-60-5	C18H24Cl2N6O	Cl.Cl.CCC(N)CNC1=NC(=NC=C1)C2=C(O)C=CC(=C2)C3=C[N](C)N=C3	73.7943	26.3247
Loureirin B	PAI-1	Metabolism	Loureirin B (LB, LrB), a flavonoid extracted from Dracaena cochinchinensis, is an inhibitor of PAI-1 with IC50 of 26.10 μM. Loureirin B downregulates p-ERK and p-JNK in TGF-β1-stimulated fibroblasts. Loureirin B promotes insulin secretion mainly through increasing Pdx-1, MafA, intracellular ATP level, inhibiting the K<sub>ATP</sup> current, influx of Ca<sup>2+<sup> to the intracellular.	316.35	119425-90-0	C18H20O5_x000D_	COC1=CC(=C(CCC(=O)C2=CC=C(O)C=C2)C(=C1)OC)OC	10.2632	20.736
WAY-663387	FLT3	Angiogenesis ,Protein Tyrosine Kinase	FLT3 kinase inhibitor	197.231	876866-50-1	C10H15NO3	OC(=O)C1CCN(CC1)C(=O)C2CC2	-1.1205	29.5352
Cabozantinib malate (XL184)	TAM Receptor,VEGFR	Protein Tyrosine Kinase	Cabozantinib malate (XL184) is the malate of Cabozantinib, a potent VEGFR2 inhibitor with IC50 of 0.035 nM and also inhibits c-Met, Ret, Kit, Flt-1/3/4, Tie2, and AXL with IC50 of 1.3 nM, 4 nM, 4.6 nM, 12 nM/11.3 nM/6 nM, 14.3 nM and 7 nM in cell-free assays, respectively.	635.59	1140909-48-3	C32H30FN3O10	COC1=CC2=C(C=C1OC)C(=CC=N2)OC3=CC=C(NC(=O)C4(CC4)C(=O)NC5=CC=C(F)C=C5)C=C3.OC(CC(O)=O)C(O)=O	11.4106	-0.0837359
WAY-270947	ALK5	TGF-beta/Smad	ALK5 inhibitor	412.243	1198579-20-2	C17H14BrN7O	CC1=C(C([N]2N=NN=C2N1)C3=CC=C(Br)C=C3)C(=O)NC4=CC=CN=C4	9.01739	12.1386
WAY-635767	Aurora kinase A	Cell Cycle & Epigenetics	Aurora kinase A inhibitor; altering the lifespan of a eukaryotic organism;	249.696	790232-33-6	C12H12ClN3O	ClC1=CC=C(C=C1)C2=NN=C(CNC3CC3)O2	13.7708	-0.103238
WAY-300046	LtaS,herpes simplex viruses thymidine kinase,terminal transferase,Bacillus subtilis DNA polymerase III	DNA Damage	inhibiting gram positive bacteria	231.251	41648-10-6	C12H13N3O2	CC1=CC=C(NC2=CC(=O)NC(=O)N2)C=C1C	-8.41045	6.46312
SAR131675	VEGFR	Protein Tyrosine Kinase	SAR131675 is a VEGFR3 inhibitor with IC50/Ki of 23 nM/12 nM in cell-free assays, about 50- and 10-fold more selective for VEGFR3 than VEGFR1/2, little activity against Akt1, CDKs, PLK1, EGFR, IGF-1R, c-Met, Flt2 etc.	358.39	1433953-83-3	C18H22N4O4	CCN1C(=C(C(=O)NC)C(=O)C2=CC=C(N=C12)C#CC(C)(O)COC)N	-0.0245929	-9.80558
WAY-352563	CDK	Cell Cycle	CDK9 Inhibitors	294.301	505051-04-7	C18H14O4	CC1=CC=C(COC(=O)C2=CC(=O)C3=CC=CC=C3O2)C=C1	5.97122	5.75203
WAY-352835	tyrosine kinase	Protein Tyrosine Kinase	tyrosine kinase inhibitors; tyrosine kinase inhibitors;	297.375	401638-52-6	C16H15N3OS	OC1=CC=CC=C1NC2=NC=NC3=C2C4=C(CCCC4)S3	10.8999	1.50862
WHI-P258	JAK	JAK/STAT	WHI-P258 is an inhibitor of JAK3 with Ki value of 72 μM.	281.31	21561-09-1	C16H15N3O2_x000D_	COC1=CC2=C(C=C1OC)C(=NC=N2)NC3=CC=CC=C3	22.2374	12.7455
ST 271	Phospholipase (e.g.	Protein Tyrosine Kinase	ST271 is a tyrphostin-like protein tyrosine kinase (PTK) inhibitor which inhibits phospholipase D (PLD) activity.	272.34	106392-48-7	C16H20N2O2_x000D_	CC(C)C1=C(O)C(=CC(=C1)/C=C(C#N)/C(N)=O)C(C)C	20.4645	23.6079
DCLK1-IN-1	Serine/threonin kinase	Metabolism	DCLK1-IN-1 is a selective, in vivo-compatible chemical probe of the doublecortin like kinase 1 (DCLK1) domain that binds to DCLK1 and DCLK2 with IC50 of 9.5 nM and 31 nM, respectively. DCLK1-IN-1 inhibits DCLK1 and DCLK2 kinases with IC50 of 57.2 nM and 103 nM in kinase assay, respectively.	527.54	2222635-15-4	C26H28F3N7O2_x000D_	COC1=C(NC2=NC=C3N(CC(F)(F)F)C(=O)C4=CC=CC=C4N(C)C3=N2)C=CC(=C1)N5CCN(C)CC5	22.9424	28.7786
PHA-767491	CDK	Cell Cycle	PHA-767491 is a potent ATP-competitive dual Cdc7/CDK9 inhibitor with IC50 of 10 nM and 34 nM in cell-free assays, respectively.It displays ~20-fold selectivity against CDK1/2 and GSK3-β, 50-fold selectivity against MK2 and CDK5, 100-fold selectivity against PLK1 and CHK2.	249.7	942425-68-5	C12H11N3O.HCl	O=C1NCCC2=C1C=C([NH]2)C3=CC=NC=C3	48.109	11.0533
Tie2 kinase inhibitor	Tie-2	Protein Tyrosine Kinase	Tie2 kinase inhibitor is an optimized compound of SB-203580, selective to Tie2 with IC50 of 0.25 μM, 200-fold more potent than p38.	439.53	948557-43-5	C26H21N3O2S	COC1=CC2=C(C=C1)C=C(C=C2)C3=C(N=C([NH]3)C4=CC=C(C=C4)[S](C)=O)C5=CC=NC=C5	10.2167	16.0586
CL-243214	others	kinase	Mycobacterium tuberculosis shikimate kinase inhibitors	258.296	333785-55-0	C13H10N2O2S	O=C1N(CC2=CC=CO2)C(=S)NC3=CC=CC=C13	14.5666	11.2124
WAY-333491	LRRK2	Autophagy	LRRK2 kinase inhibitor	353.441	852375-30-5	C18H19N5OS	CC1=CC=C(C=C1)C2=NN=C3C=CC(=N[N]23)SCC(=O)N4CCCC4	-3.48636	27.2201
WAY-601323	CDK9	Cell Cycle	Mimetic CDK9 Inhibitors	298.34	324778-48-5	C16H18N4O2	OC(=O)C1=C(NC2=NC(=NC=C2)N3CCCCC3)C=CC=C1	-5.94519	-13.0666
WAY-325485	protein kinase-activated protein kinase-2	Others	altering the lifespan of a eukaryotic organism; mitogen activated protein kinase-activated protein kinase-2 inhibitor;	275.305	177937-81-4	C17H13N3O	CC1=C(N=C(N)C(=C1C2=CC=CO2)C#N)C3=CC=CC=C3	15.2845	-7.02578
Honokiol	Akt,MEK	PI3K/Akt/mTOR	Honokiol is the active principle of magnolia extract that inhibits Akt-phosphorylation and promotes ERK1/2 phosphorylation. Phase 3.	266.334	35354-74-6	C18H18O2	OC1=C(CC=C)C=C(C=C1)C2=CC(=CC=C2O)CC=C	19.6241	-0.712877
WAY-344977	GSK-3	PI3K/Akt/mTOR,Stem Cells,Wnt	Inhibitors of Glycogen Synthase Kinase 3	376.86	686743-57-7	C17H17ClN4O2S	COCC[N]1C(=NC2=CC=CC=C12)SCC(=O)NC3=NC=C(Cl)C=C3	32.7058	7.61045
Varlitinib	EGFR	Protein Tyrosine Kinase	Varlitinib is a selective and potent ErbB1(EGFR) and ErbB2(HER2) inhibitor with IC50 of 7 nM and 2 nM, respectively. Phase 2.	466.94	845272-21-1	C22H19ClN6O2S	CC1COC(=N1)NC2=CC3=C(C=C2)N=CN=C3NC4=CC(=C(OCC5=NC=CS5)C=C4)Cl	44.0779	17.2493
TAK-285	EGFR,HER2	Protein Tyrosine Kinase	TAK-285 is a novel dual HER2 and EGFR(HER1) inhibitor with IC50 of 17 nM and 23 nM, >10-fold selectivity for HER1/2 than HER4, less potent to MEK1/5, c-Met, Aurora B, Lck, CSK etc. Phase 1.	547.96	871026-44-7	C26H25ClF3N5O3	CC(C)(O)CC(=O)NCC[N]1C=CC2=C1C(=NC=N2)NC3=CC=C(OC4=CC=CC(=C4)C(F)(F)F)C(=C3)Cl	3.48043	-16.0157
WAY-381785	GSK3	PI3K/Akt/mTOR,Stem Cells,Wnt	inhibitors of GSK3 kinases	321.416	511239-29-5	C20H23N3O	CC1=CC=C(C=C1)C2C3=C(CC(C)(C)CC3=O)NC4=C2C(=N[NH]4)C	5.04014	8.3846
WAY-322940	Rho	Cell Cycle	inhibitors of Rho kinase	436.484	445267-51-6	C22H20N4O4S	COC1=CC(=CC(=C1OC)OC)NC(=O)C2=C(N)C3=C(S2)N=C(C=C3)C4=CC=NC=C4	16.5531	26.0868
Solanesol (Nonaisoprenol)	others	others	Solanesol (Nonaisoprenol, Betulanonaprenol) is a long-chain polyisoprenoid alcohol compound with inhibitory activities toward <b>FAK</b>. It mainly accumulates in solanaceous crops, including tobacco, tomato, potato, eggplant, and pepper plants.	631.07	13190-97-1	C45H74O_x000D_	CC(C)=CCC/C(C)=C/CC/C(C)=C/CC/C(C)=C/CC/C(C)=C/CC/C(C)=C/CC/C(C)=C/CCC(/C)=C/CC/C(C)=C/CO	49.5151	3.75209
CP-673451	PDGFR	Protein Tyrosine Kinase	CP-673451 is a selective inhibitor of PDGFRα/β with IC50 of 10 nM/1 nM in cell-free assays, exhibits >450-fold selectivity over other angiogenic receptors, has antiangiogenic and antitumor activity.	417.5	343787-29-1	C24H27N5O2	COCCOC1=CC=C2[N](C=NC2=C1)C3=NC4=C(C=CC=C4C=C3)N5CCC(N)CC5	10.1842	44.6442
K02288	TGF-beta/Smad	TGF-beta/Smad	K02288 is a potent, and selective type I BMP receptor inhibitor with IC50 of 1.1, 1.8, 6.4 nM for ALK2, ALK1 and ALK6, showing weaker inhibition on other ALKs (3, 4, 5) and ActRIIA.	352.38	1431985-92-0	C20H20N2O4	COC1=CC(=CC(=C1OC)OC)C2=C(N)N=CC(=C2)C3=CC=CC(=C3)O	16.1267	16.5818
WAY-300744	kinase	Protein Tyrosine Kinase	kinase inhibitors	343.228	314284-06-5	C14H12Cl2N2O2S	CC1=C(C)C(=C(NC(=O)C2=CC=C(Cl)C=C2Cl)S1)C(N)=O	59.8883	21.7638
Dehydrocostus Lactone	IκB/IKK	NF-κB	Dehydrocostus lactone (DHE), a natural sesquiterpene lactone, inhibits IKKβ activity, IκBα phosphorylation and degradation, coactivators p300 recruitments and p50/p65 NF-κB nuclear translocation, and their DNA binding activity on COX-2 promoter. It has anti-inflammatory, anti-ulcer, immunomodulatory and anti-tumor properties.	230.3	477-43-0	C15H18O2	C=C1CCC2C(OC(=O)C2=C)C3C1CCC3=C	13.7778	-0.958556
Esculentoside A	Immunology & Inflammation related	Immunology & Inflammation	Esculentoside A, isolated from the Chinese herb <i>phytolacca esculenta</i>, possesses a broad inhibitory effect on a panel of pro-inflammation molecules with less toxicity.	826.96	65497-07-6	C42H66O16_x000D_	COC(=O)C1(C)CCC2(CCC3(C)C(=CCC4C5(C)CC(O)C(OC6OCC(OC7OC(CO)C(O)C(O)C7O)C(O)C6O)C(C)(CO)C5CCC34C)C2C1)C(O)=O	7.18651	10.613
SJ000291942	TGF-beta/Smad	TGF-beta/Smad & Stem Cells & Wnt	SJ000291942 is a canonical <b>bone morphogenetic proteins (BMP)</b> signaling pathway activator.	318.3	425613-09-8	C16H15FN2O4_x000D_	CCC1=CC=C(OCC(=O)NC2=CC(=C(F)C=C2)[N+]([O-])=O)C=C1	48.5718	6.21248
Lapatinib	EGFR,HER2	Protein Tyrosine Kinase	Lapatinib, used in the form of Lapatinib Ditosylate, is a potent EGFR and ErbB2 inhibitor with IC50 of 10.8 and 9.2 nM in cell-free assays, respectively.	581.06	231277-92-2	C29H26ClFN4O4S	C[S](=O)(=O)CCNCC1=CC=C(O1)C2=CC=C3N=CN=C(NC4=CC=C(OCC5=CC=CC(=C5)F)C(=C4)Cl)C3=C2	28.7613	8.61994
WAY-621856	FGFR	Angiogenesis & Protein Tyrosine Kinase	FGFR inhibitor	351.339	606958-57-0	C16H9N5O3S	[O-][N+](=O)C1=CC(=CC=C1)\C=C\2SC3=NC(=N[N]3C2=O)C4=CC=NC=C4	-8.10707	16.9562
WAY-107407	PI3K	PI3K/Akt/mTOR	altering the lifespan of a eukaryotic organism; PI3K inhibitor; antimicrobial activities;	268.267	1164469-67-3	C15H12N2O3	O=C1NC(NC2=C1C=CC=C2)C3=CC4=C(OCO4)C=C3	19.8035	23.4458
WAY-633877	Casein kinase 1δ	Metabolism	Casein kinase 1δ inhibitor	389.407	782452-74-8	C21H19N5O3	CC1=NOC2=C1C(=CC(=N2)C3=CC4=C(OCO4)C=C3)C5=NN=C6CCCCC[N]56	-12.7155	-3.38732
BMS-777607	TAM Receptor,c-Met	Protein Tyrosine Kinase	BMS-777607 is a Met-related inhibitor for c-Met, Axl, Ron and Tyro3 with IC50 of 3.9 nM, 1.1 nM, 1.8 nM and 4.3 nM in cell-free assays, 40-fold more selective for Met-related targets versus Lck, VEGFR-2, and TrkA/B, and more than 500-fold greater selectivity versus all other receptor and non receptor kinases. Phase 1/2.	512.89	1025720-94-8	C25H19ClF2N4O4	CCOC1=C(C(=O)NC2=CC=C(OC3=CC=NC(=C3Cl)N)C(=C2)F)C(=O)N(C=C1)C4=CC=C(F)C=C4	20.9207	12.1163
Timosaponin A3	ROS	transporter	Timosaponin A3 triggers liver injury through inducing ROS generation and suppressing the expression of BA transporters. Timosaponin A3 has selectively cytotoxic for cancer versus normal cells, the selective cytotoxic properties of it could be related to the inhibition of major oncogenic pathways and induction of ER stress. Timosaponin A3 and Sarsasapogenin can inhibit nuclear factor-kB and p38 si…	740.918	41059-79-4	C39H64O13	CC1CCC2(OC1)OC3CC4C5CCC6CC(CCC6(C)C5CCC4(C)C3C2C)OC7OC(CO)C(O)C(O)C7OC8OC(CO)C(O)C(O)C8O	6.34959	12.6209
Ginsenoside Re	Others	Others	Ginsenoside Re is a major ginsenoside in ginseng and belongs to 20(S)-protopanaxatriol group. It has diverse in vitro and in vivo effects, including vasorelaxant, antioxidant, antihyperlipidemic, and angiogenic actions.	947.15	52286-59-6	C48H82O18	CC1OC(OC2C(O)C(O)C(CO)OC2OC3CC4(C)C(CC(O)C5C(CCC45C)C(C)(CCC=C(C)C)OC6OC(CO)C(O)C(O)C6O)C7(C)CCC(O)C(C)(C)C37)C(O)C(O)C1O	10.8571	5.89677
(-)-Blebbistatin	ATPase	Transmembrane Transporters	(-)-Blebbistatin is a cell-permeable inhibitor for non muscle myosin II ATPase with IC50 of ~2 μM in cell-free assays, does not inhibit myosin light chain kinase, inhibits contraction of the cleavage furrow without disrupting mitosis or contractile ring assembly.	292.33	856925-71-8	C18H16N2O2	CC1=CC=C2N=C3N(CCC3(O)C(=O)C2=C1)C4=CC=CC=C4	40.2545	14.1489
LTI-291	Others	Metabolism	LTI-291 is the first small-molecule activator of <b>Glucocerebrosidase(GCase)</b> for the treatment of parkinson's disease.	358.48	1919820-28-2	C20H30N4O2_x000D_ _x000D_	CCCCCOC1CCC(CC1)NC(=O)C2=C3N=C(C)C=C(C)[N]3N=C2	40.8356	19.4043
WAY-349858	c-Jun N-terminal kinase	others	dual inhibitors of the c-Jun N-terminal kinase	320.364	771503-50-5	C15H16N2O4S	COC1=C(OC)C=C(CC(=O)NC2=C(C=CS2)C(N)=O)C=C1	4.53901	20.7573
R-IMPP	Others	Others	R-IMPP is an inhibitor of PCSK9 secretion, half maximal inhibitory concentration [IC50] = 4.8 μM.	389.49	2133832-83-2	C24H27N3O2	COC1=CC=C(CCC(=O)N(C2CCCNC2)C3=C4C=CC=CC4=CC=N3)C=C1	-4.72894	6.29468
Sophocarpine Monohydrate	AMPK	AMPK	Sophocarpine and matrine exert anti-cachectic effects probably through inhibition of TNF-alpha and IL-6 and prevent cachexia-related symptoms induced by colon26 adenocarcinoma in mice. Sophocarpine injection (called the Kangke injection) has been demonstrated to have significant antivirus effects against coxsackievirus B3 and therapeutic effects for viral myocarditis in clinical. Sophocarpine exe…	264.363	145572-44-7	C15H24N2O2	O.O=C1C=CCC2C3CCCN4CCCC(CN12)C34	24.7582	14.6236
GLPG0634 analogue	JAK	JAK/STAT	GLPG0634 analogue is a selective <b>JAK1</b> inhibitor with <b>IC50</b> of 10 nM, 28 nM, 810 nM, and 116 nM for JAK1, JAK2, JAK3, and TYK2, respectively. Phase 2._x000D_	410.43	1206101-20-3	C23H18N6O2_x000D_	O=C(NC1=N[N]2C(=N1)C=CC=C2C3=CC=C(OCC4=CC=C(N=C4)C#N)C=C3)C5CC5	23.0006	23.4383
WAY-347243	Mycobacterium tuberculosis shikimate kinase	Microbiology	Mycobacterium tuberculosis shikimate kinase inhibitors	219.306	422298-69-9	C11H13N3S	CSC1=NN=C(C)[N]1CC2=CC=CC=C2	6.22446	18.2165
WAY-352753	GSK-3	Stem Cells & Wnt	altering the lifespan of eukaryotic organisms; glycogen synthase kinase-3 inhibitors;	303.767	478482-74-5	C14H10ClN3OS	ClC1=C(CSC2=NN=C(O2)C3=CC=NC=C3)C=CC=C1	14.6097	-3.18807
WAY-310334	mPGES-1,human protein kinase CK2	others	mPGES-1 inhibitors; inhibitors of human protein kinase CK2;	308.419	688335-72-0	C14H16N2O2S2	CC1CCC2=C(C1)SC3=C2C(=NC=N3)SC(C)C(O)=O	25.4574	5.83109
WAY-329412	Abl	Angiogenesis	ABL kinase inhibiting activities	439.506	943932-69-2	C27H25N3O3	COC1=C(CNC(=O)C2C(N(C)C(=O)C3=CC=CC=C23)C4=C[NH]C5=C4C=CC=C5)C=CC=C1	5.43572	13.8903
WAY-614915	Casein kinase 1δ	Metabolism	Casein kinase 1δ inhibitor; Casein kinase 1δ inhibitor;	270.353	450394-66-8	C14H14N4S	CC1=C(C)C2=C(S1)N=CN=C2NCC3=NC=CC=C3	27.7591	-22.5812
WAY-619999	CK2,GSK3β	Metabolism,PI3K/Akt/mTOR & Stem Cells & Wnt	inhibitor of CK2 and GSK3β	460.31	736932-33-5	C22H19Cl2N3O4	ClC1=CC(=C(CCNC(=O)COC(=O)C2=CC3=C(C=C2)C(=O)N4CCCC4=N3)C=C1)Cl	3.73853	6.78302
AMG319	PI3K	PI3K/Akt/mTOR	AMG319 is a potent and selective PI3Kδ inhibitor with IC50 of 18 nM, >47-fold selectivity over other PI3Ks. Phase 2.	385.4	1608125-21-8	C21H16FN7	CC(NC1=C2N=C[NH]C2=NC=N1)C3=C(N=C4C=C(F)C=CC4=C3)C5=CC=CC=N5	3.61257	26.3759
BAW2881 (NVP-BAW2881)	VEGFR,Raf,c-RET	Protein Tyrosine Kinase	BAW2881 (NVP-BAW2881) is a novel vascular endothelial growth factor (VEGF) receptor tyrosine-kinase inhibitor that potently inhibits VEGFR1-3 at 1.0-4.3 nanomolar (nM) concentrations and inhibits PDGFRβ, c-Kit, and RET at 45-72 nM concentrations.	424.38	861875-60-7	C22H15F3N4O2	NC1=NC(=CC=N1)OC2=CC=C3C(=C2)C=CC=C3C(=O)NC4=CC(=CC=C4)C(F)(F)F	43.4416	18.9066
BX-795	IκB/IKK,PDK	PI3K/Akt/mTOR	BX795 is a potent and specific PDK1 inhibitor with IC50 of 6 nM, 140- and 1600-fold more selective for PDK1 than PKA and PKC in cell-free assays, respectively. Meanwhile, in comparison to GSK3β more than 100-fold selectivity observed for PDK1.	591.47	702675-74-9	C23H26IN7O2S	IC1=CN=C(NC2=CC(=CC=C2)NC(=O)N3CCCC3)N=C1NCCCNC(=O)C4=CC=CS4	45.8408	20.7902
NMS-P937 (NMS1286937)	PLK	Cell Cycle	NMS-P937 (NMS1286937) is an orally available, selective Polo-like Kinase 1 (PLK1) inhibitor with IC50 of 2 nM, 5000-fold selectivity over PLK2/PLK3. Phase 1.	532.52	1034616-18-6	C24H27F3N8O3	CN1CCN(CC1)C2=CC=C(OC(F)(F)F)C(=C2)NC3=NC4=C(CCC5=C4[N](CCO)N=C5C(N)=O)C=N3	36.6349	7.87303
WAY-299590	InhA,p38a	MAPK	inhibitor against Mycobacterium tuberculosis Enoyl acyl carrier protein reductase; InhA inhibitor; InhA inhibitor; p38a kinase inhibitor;	297.367	260428-61-3	C19H20FNO	FC1=C(C=CC=C1)C(=O)N2CCC(CC2)CC3=CC=CC=C3	29.5219	24.9193
Skatole	Anti-infection	Microbiology	Skatole (3-Methylindole) is a mildly toxic white crystalline organic compound that occurs naturally in feces. It has a fairly broad bacteriostatic effect.	131.17	83-34-1	C9H9N	CC1=C[NH]C2=C1C=CC=C2	11.5049	7.50561
Nilotinib (AMN-107)	Bcr-Abl	Angiogenesis	Nilotinib (AMN-107) is a selective Bcr-Abl inhibitor with IC50 less than 30 nM in Murine myeloid progenitor cells.	529.52	641571-10-0	C28H22F3N7O	CC1=C[N](C=N1)C2=CC(=CC(=C2)C(F)(F)F)NC(=O)C3=CC=C(C)C(=C3)NC4=NC=CC(=N4)C5=CN=CC=C5	51.1488	10.0465
WAY-278559-A	ethanolamine kinase	others	ethanolamine kinase inhibitors	285.384	301330-81-4	C17H23N3O	CCN1CCN(CC1)C2=NC3=C(C=CC(=C3)OC)C(=C2)C	4.60235	-4.64592
WAY-606344	Casein kinase 1d	Metabolism	Casein kinase 1d inhibitor; altering the lifespan of a eukaryotic organism;	285.685	380423-28-9	C14H8ClN3O2	ClC1=CC=C(C=C1)C(=O)C2=NN=C(O2)C3=CC=NC=C3	28.8912	0.661282
K-Ras-IN-1	Ras	Cell Cycle	K-Ras-IN-1 inhibits K-Ras by binding to K-Ras in a hydrophobic pocket that is occupied by Tyr-71 in the apo-Ras crystal structure.	207.29	84783-01-7	C11H13NOS_x000D_	OC1=CC=CC=C1C(=S)N2CCCC2	10.1565	-8.38823
TAS6417	EGFR	Angiogenesis	TAS6417 is a novel <b>EGFR</b> inhibitor that targets EGFR exon 20 insertion mutations while sparing wild-type (WT) EGFR. IC50 values ranges from 1.1 ± 0.1 to 8.0 ± 1.1 nmol/L.	396.44	1661854-97-2	C23H20N6O_x000D_	CC1=CC(C[N]2C3=NC=NC(=C3C(=C12)C4=CC5=CC=CC=C5N=C4)N)NC(=O)C=C	-2.297	0.132996
Centrinone (LCR-263)	PLK	Cell Cycle	Centrinone (LCR-263) is a selective and reversible polo-like kinase 4 (PLK4) inhibitor with Ki of 0.16 nM.	633.65	1798871-30-3	C26H25F2N7O6S2_x000D_	COC1=C(N=C(SC2=CC=C(C=C2F)[S](=O)(=O)CC3=CC=CC(=C3F)[N+]([O-])=O)N=C1NC4=N[NH]C(=C4)C)N5CCOCC5	10.6252	10.9335
3BDO	mTOR,Autophagy	PI3K/Akt/mTOR	3BDO, a butyrolactone derivative, could target FKBP1A and activate the mTOR signaling pathway. It inhibits autophagy in HUVECs.	327.33	890405-51-3	C18H17NO5	[O-][N+](=O)C1=C(OCC2CC(CC3=CC=CC=C3)C(=O)O2)C=CC=C1	3.48293	5.06322
WAY-329599	kinase	others	kinase inhibitory activity	351.376	956910-38-6	C14H10FN3O3S2	FC1=C(NC(=O)C[S](=O)(=O)C2=CC=CC3=NSN=C23)C=CC=C1	1.77692	15.589
LY2409881	IκB/IKK	NF-κB	LY2409881 is a potent and selective IKK2 inhibitor with IC50 of 30 nM, >10-fold selectivity over IKK1 and other common kinases.	594.43	946518-60-1	C24H32Cl4N6OS	Cl.Cl.Cl.CN1CCN(CCCNC2=NC=C(Cl)C(=N2)C3=CC4=C(S3)C=CC=C4C(=O)NC5CC5)CC1	19.8552	33.0742
HER2-Inhibitor-1	EGFR,HER2	Protein Tyrosine Kinase	HER2-Inhibitor-1 is an analog of ARRY-380. ARRY-380 is a potent and selective HER2 inhibitor with IC50 of 8 nM, equipotent against truncated p95-HER2, 500-fold more selective for HER2 versus EGFR.	569.63	937265-83-3	C29H27N7O4S	CC1=CC(=CC=C1OC2=CC3=NC=N[N]3C=C2)NC4=C5C=C(C=CC5=NC=N4)C6=CC=C(CNCC[S](C)(=O)=O)O6	15.3556	-3.03773
WAY-607500	VEGFR	Protein Tyrosine Kinase & Angiogenesis	VEGFR inhibitor; tyrosine kinase activity modulator;	306.358	186610-88-8	C19H18N2O2	O=C/1NC2=C(C=CC=C2)C1=C/C3=CC=C(C=C3)N4CCOCC4	5.9164	36.2226
WAY-616312	sirtuin,Rho,CDK	DNA Damage,Epigenetics, Cell Cycle	sirtuin modulator; sirtuin modulator; sirtuin modulator; glucokinase activator; sirtuin modulator; altering the lifespan of a eukaryotic organism; MAPKAP kinase-5 inhibitor; Rho kinase inhibitor; CDK inhibitor;	423.25	730946-98-2	C18H16Cl2N4O4	CN1C(=C(C(=O)COC2=C(Cl)C=C(Cl)C3=C2N=C(C)C=C3)C(=O)N(C)C1=O)N	7.4035	-3.18364
Lenalidomide (CC-5013)	TNF-alpha	Apoptosis	Lenalidomide (CC-5013) is a TNF-α secretion inhibitor with IC50 of 13 nM in PBMCs.	259.26	191732-72-6	C13H13N3O3	NC1=C2CN(C3CCC(=O)NC3=O)C(=O)C2=CC=C1	11.5132	-7.55877
Psoralidin	Estrogen/progestogen Receptor	Endocrinology & Hormones	Psoralidin, a naturally occurring coumestan isolated from the fractions of organic solvents such as ethylacetate, hexane, or n-butanol of the seed extract of Psoralea corylifolia L., has a variety of biological activities such as anticancer, antioxidant, antibacterial, antidepressant, anti-inflammatory activities, and regulation of insulin signaling. It is an agonist for both estrogen receptor (E…	336.34	18642-23-4	C20H16O5	CC(C)=CCC1=CC2=C(OC(=O)C3=C2OC4=C3C=CC(=C4)O)C=C1O	5.93335	-0.253411
Adjudin	Chloride Channel. NF-κB. ERK	Transmembrane Transporters	Adjudin (AF-2364), a potent male contraceptive, is a potent blocker of <b>Cl⁻ channels</b>. Adjudin exhibits anti-inflammatory properties by suppression of <b>NF-κB</b> p65 nuclear translocation and DNA binding activity as well as <b>ERK</b> MAPK phosphorylation.	335.19	252025-52-8	C15H12Cl2N4O_x000D_	NNC(=O)C1=N[N](CC2=C(Cl)C=C(Cl)C=C2)C3=CC=CC=C13	50.5588	20.0393
H 89 2HCl	PKA,S6 Kinase	PI3K/Akt/mTOR	H 89 2HCl is a potent PKA inhibitor with Ki of 48 nM in a cell-free assay, 10-fold selective for PKA than PKG,500-fold greater selectivity than PKC, MLCK, calmodulin kinase II and casein kinase I/II.	519.28	130964-39-5	C20H22BrCl2N3O2S	Cl.Cl.BrC1=CC=C(/C=C/CNCCN[S](=O)(=O)C2=CC=CC3=C2C=CN=C3)C=C1	19.6055	15.0005
WAY-329598	kinase	others	kinase inhibitory activity	361.439	956910-48-8	C16H15N3O3S2	CCC1=CC=C(NC(=O)C[S](=O)(=O)C2=CC=CC3=NSN=C23)C=C1	6.59934	20.613
Falcarindiol	NOS	Immunology & Inflammation	Falcarindiol (FAD, (3R,8S)-Falcarindiol, FaDOH) is a natural polyacetylene compound found rich in many plants of the Umbelliferae family. Falcarindiol suppresses LPS-stimulated expression of inducible nitric oxide synthase (iNOS), tumor necrosis factor alpha (TNFα), interleukin-6 (IL-6), and interleukin-1 beta (IL-1β). Falcarindiol attenuates the LPS-induced activation of JNK, ERK, STAT1, and STA…	260.37	225110-25-8	C17H24O2_x000D_	CCCCCCC\C=C/C(O)C#CC#CC(O)C=C	11.0436	24.8735
PF 429242	S1P Receptor	GPCR & G Protein	PF 429242 is known as a <b>S1P</b> inhibitor with an IC50 of 170 nM, showing no significant inhibition of trypsin, elastase, proteinase K, plasmin, kallikren, factor XIa, thrombin, or furin at concentrations up to 100 μM and only modest inhibition of urokinase (IC50 = 50 μM) and factor Xa (IC50 = 100 μM).	409.56	947303-87-9	C25H35N3O2_x000D_	CCN(CC)CC1=CC=C(C=C1)C(=O)N(CCC2=CC=CC=C2OC)C3CCNC3	36.3914	27.546
Myristic Acid	Others	Others	A 14 carbon saturated fatty acid	228.371	544-63-8	C14H28O2	CCCCCCCCCCCCCC(O)=O	13.3765	17.2366
6-Gingerol	Others	Others	6-Gingerol is the active constituent of fresh ginger known to exhibit a variety of biological activities including anticancer, anti-inflammation, and anti-oxidation.	294.39	23513-14-6	C17H26O4	CCCCCC(O)CC(=O)CCC1=CC=C(O)C(=C1)OC	2.66785	-0.826342
WAY-642424	Casein kinase 1δ	Metabolism	Casein kinase 1δ inhibitors	379.411	851396-73-1	C19H14FN5OS	FC1=CC=C(C=C1)[N]2C(=NN=C2C3=CC=NC=C3)SCC(=O)C4=CC=C[NH]4	1.60406	6.22774
Rebastinib (DCC-2036)	Bcr-Abl	Angiogenesis	Rebastinib (DCC-2036) is a conformational control Bcr-Abl inhibitor for Abl1(WT) and Abl1(T315I) with IC50 of 0.8 nM and 4 nM, also inhibits SRC, LYN, FGR, HCK, KDR, FLT3, and Tie-2, and low activity to seen towards c-Kit. Phase 1.	553.59	1020172-07-9	C30H28FN7O3	CNC(=O)C1=NC=CC(=C1)OC2=CC(=C(NC(=O)NC3=CC(=N[N]3C4=CC5=C(C=C4)N=CC=C5)C(C)(C)C)C=C2)F	18.5012	17.7893
3,4-Dihydroxyhydrocinnamic acid	Others	Others	3,4-Dihydroxyhydrocinnamic acid is a metabolite product of the hydrogenation of caffeoylquinic acids, occurring in normal human biofluids, with potent antioxidant properties.	182.17	1078-61-1	C9H10O4_x000D_	OC(=O)CCC1=CC(=C(O)C=C1)O	-6.80306	8.01446
WAY-325484	CDK8	Cell Cycle	CDK8 inhibitor; altering the lifespan of a eukaryotic organism;	266.341	642002-74-2	C16H18N4	CCCC1=C(CC)C(=C(C#N)C(=N1)N)C2=CN=CC=C2	8.43174	18.0408
SF1670	PTEN	Others	SF1670 is a highly potent and specific PTEN inhibitor with IC50 of 2 μM.	307.34	345630-40-2	C19H17NO3	CC(C)(C)C(=O)NC1=CC2=C(C=C1)C3=C(C=CC=C3)C(=O)C2=O	23.6856	10.0331
WAY-628644	p38	MAPK	p38α inhibitors	214.263	377760-40-2	C13H14N2O	CCC1=NC(=C(C(=O)N1)C2=CC=CC=C2)C	3.28148	9.88838
WAY-270250	IGF-1R,SRC	Protein Tyrosine Kinase	IGF-1R/SRC inhibitor	292.332	852367-46-5	C18H16N2O2	CC1=CC=C(CNC(=O)C(=O)C2=C[NH]C3=C2C=CC=C3)C=C1	2.35773	-10.9647
Alisertib (MLN8237)	Aurora Kinase	Cell Cycle	Alisertib (MLN8237) is a selective Aurora A inhibitor with IC50 of 1.2 nM in a cell-free assay. It has >200-fold higher selectivity for Aurora A than Aurora B. Phase 3.	518.92	1028486-01-2	C27H20ClFN4O4	COC1=C(C(=CC=C1)F)C2=NCC3=C(N=C(NC4=CC(=C(C=C4)C(O)=O)OC)N=C3)C5=C2C=C(Cl)C=C5	12.7705	-20.6397
BTK inhibitor 1 (Compound 27)	BTK	Angiogenesis	BTK inhibitor 1 (compound 27) is an inhibitor of <b>BTK</b> with an IC50 of 0.11 nM for Btk and inhibits B cell activation in hWB with an IC50 of 2 nM.	474.49	2230724-66-8	C24H23FN8O2	C[N]1C=C(C=N1)C2=CC3=C(N=CN=C3[NH]2)C4=CC=C(CNC(=O)C5=NOC(=N5)C(C)(C)C)C(=C4)F	42.6094	19.4221
Rhosin hydrochloride	Rho	Cell Cycle	Rhosin (G04) hydrochloride (HCl) is a potent, specific inhibitor of RhoA subfamily <b>Rho</b> GTPases with Kd of ~ 0.4 uM. Rhosin hydrochloride induces cell <b>apoptosis</b>.	394.86	1281870-42-5	C20H19ClN6O_x000D_	Cl.NC(CC1=C[NH]C2=CC=CC=C12)C(=O)N\N=C\C3=CC4=NC=CN=C4C=C3	6.80746	-9.76318
Forsythin	Others	Others	Forsythin (FOR) is an active ingredient extracted from the fruit of the medicinal plant Forsythia suspensa (Thunb.) Vahl and has been shown to have antioxidant, antibacterial and antiinflammatory properties.	534.55	487-41-2	C27H34O11	COC1=CC=C(C=C1OC)C2OCC3C2COC3C4=CC(=C(OC5OC(CO)C(O)C(O)C5O)C=C4)OC	0.375192	12.3004
CX-6258 HCl	Pim	JAK/STAT	CX-6258 HCl is a potent, orally efficacious pan-Pim kinase inhibitor with IC50 of 5 nM, 25 nM and 16 nM for Pim1, Pim2, and Pim3, respectively.	498.4	1353859-00-3	C26H25Cl2N3O3	Cl.CN1CCCN(CC1)C(=O)C2=CC=CC(=C2)C3=CC=C(O3)\C=C4\C(=O)NC5=C4C=C(Cl)C=C5	40.6672	10.7583
SC79	Akt	PI3K/Akt/mTOR	SC79 is a brain-penetrable Akt phosphorylation activator and an inhibitor of Akt-PH domain translocation.	364.78	305834-79-1	C17H17ClN2O5	CCOC(=O)C(C#N)C1C2=CC(=CC=C2OC(=C1C(=O)OCC)N)Cl	19.2667	24.5917
NT157	IGF-1R	Protein Tyrosine Kinase	NT157, a selective inhibitor of IRS-1/2(insulin receptor substrate), has the potential to inhibit IGF-1R and STAT3 signaling pathways in cancer cells and stroma cells of TME leading to a decrease in cancer cell survival.	412.26	1384426-12-3	C16H14BrNO5S	OC1=CC(=CC(=C1O)O)CNC(=S)/C=C/C2=CC(=C(O)C(=C2)Br)O	32.9248	3.48325
R406	FLT3,Syk	Angiogenesis	R406 is a potent Syk inhibitor with IC50 of 41 nM in cell-free assays, strongly inhibits Syk but not Lyn, 5-fold less potent to Flt3. Phase 1.	628.63	841290-81-1	C28H29FN6O8S	COC1=C(OC)C(=CC(=C1)NC2=NC(=C(F)C=N2)NC3=NC4=C(OC(C)(C)C(=O)N4)C=C3)OC.O[S](=O)(=O)C5=CC=CC=C5	25.0507	25.9874
AZ 3146	Kinesin	Cytoskeletal Signaling	AZ3146 is a selective Mps1 inhibitor with IC50 of ~35 nM, contributes to recruitment of CENP-E (kinesin-related motor protein), less potent to FAK, JNK1, JNK2, and Kit.	452.55	1124329-14-1	C24H32N6O3	COC1=C(NC2=NC3=C(C=N2)N(C)C(=O)N3C4CCCC4)C=CC(=C1)OC5CCN(C)CC5	12.0623	-8.28612
Dihydromyricetin	GABA Receptor,ROS	Neuronal Signaling	Dihydromyricetin (Ampelopsin, Ampeloptin) is a natural antioxidant flavonoid from Ampelopsis grossedentata.	320.25	27200-12-0	C15H12O8	OC1C(OC2=CC(=CC(=C2C1=O)O)O)C3=CC(=C(O)C(=C3)O)O	25.8757	1.84522
WAY-635114	B-Raf	MAPK	inhibitors of B-Raf kinase	257.311	781622-52-4	C13H11N3OS	COC1=C(NC2=C3C=CSC3=NC=N2)C=CC=C1	31.2066	-14.2357
WAY-601035	PI3K	PI3K/Akt/mTOR	PI3Kγ inhibitors; PI3Kγ inhibitors; PI3 kinase inhibitor;	255.295	304645-61-2	C13H9N3OS	N=C1NC(=O)\C(S1)=C/C2=CC3=C(C=C2)N=CC=C3	2.65439	20.4104
WAY-600704	ethanolamine kinase	others	ethanolamine kinase inhibitor	270.369	301330-94-9	C17H22N2O	COC1=CC2=NC(=CC(=C2C=C1)C)N3CCCCCC3	-12.3861	18.1643
Vatalanib (PTK787) 2HCl	VEGFR	Protein Tyrosine Kinase	Vatalanib (PTK787) 2HCl is an inhibitor of VEGFR2/KDR with IC50 of 37 nM in a cell-free assay, less potent against VEGFR1/Flt-1, 18-fold against VEGFR3/Flt-4. Phase 3.	419.73	212141-51-0	C20H17Cl3N4	Cl.Cl.ClC1=CC=C(NC2=NN=C(CC3=CC=NC=C3)C4=CC=CC=C24)C=C1	9.68151	5.85896
PRN1371	FGFR	Angiogenesis	PRN1371 is an irreversible covalent FGFR1-4 kinase inhibitor, with IC50s of 0.6, 1.3, 4.1, 19.3 and 8.1 nM for FGFR1, 2, 3, 4 and CSF1R, respectively.	561.46	1802929-43-6	C26H30Cl2N6O4	CNC1=NC=C2C=C(C(=O)N(CCCN3CCN(CC3)C(=O)C=C)C2=N1)C4=C(Cl)C(=CC(=C4Cl)OC)OC	26.4043	11.1858
PF-04965842	JAK	JAK/STAT	PF-04965842 is a potent <b>JAK1</b> inhibitor with IC50s of 29 nM, 803 nM, > 10 000 nM and 1250 nM for JAK1, JAK2, JAK3 and tyrosine kinase (TYK) 2, respectively.	323.41	1622902-68-4	C14H21N5O2S_x000D_	CCC[S](=O)(=O)NC1CC(C1)N(C)C2=C3C=C[NH]C3=NC=N2	34.8971	13.2132
K-Ras(G12C) inhibitor 12	Rho	Cell Cycle	K-Ras(G12C) inhibitor 12 is an allosteric inhibitor of oncogenic K-Ras(G12C).	449.67	1469337-95-8	C15H17ClIN3O3	OC1=CC(=C(I)C=C1NCC(=O)N2CCN(CC2)C(=O)C=C)Cl	-4.03671	10.1683
20S-Ginsenoside Rg3	Sodium ChannelPotassium ChannelNF-κBCOXAmyloid-β	CancerInflammation/ImmunologyNeurological Disease		785.013	14197-60-5	C42H72O13	CC(C)=CCCC(C)(O)C1CCC2(C)C1C(O)CC3C4(C)CCC(OC5OC(CO)C(O)C(O)C5OC6OC(CO)C(O)C(O)C6O)C(C)(C)C4CCC23C	14.6064	16.6737
SB203580	p38 MAPK	MAPK	SB203580 is a p38 MAPK inhibitor with IC50 of 0.3-0.5 μM in THP-1 cells, 10-fold less sensitive to SAPK3(106T) and SAPK4(106T) and blocks PKB phosphorylation with IC50 of 3-5 μM.	377.43	152121-47-6	C21H16FN3OS	C[S](=O)C1=CC=C(C=C1)C2=NC(=C([NH]2)C3=CC=NC=C3)C4=CC=C(F)C=C4	36.2646	8.25802
WAY-383487	CDK	Cell Cycle	CDK9 Inhibitors	293.333	748146-89-6	C16H20FNO3	OC(=O)CC1(CCCCC1)CC(=O)NC2=CC=C(F)C=C2	4.56201	23.511
X-82 (Vorolanib)	VEGFR	Protein Tyrosine Kinase	Vorolanib is an oral, multikinase, dual inhibitor of <b>vascular endothelial growth factor receptor (VEGFR)</b> and <b>platelet-derived growth factor receptor (PDGFR)</b> with antiangiogenic and antineoplastic activities.	439.4	1013920-15-4	C23H26FN5O3_x000D_	CN(C)C(=O)N1CCC(C1)NC(=O)C2=C(C)[NH]C(=C2C)\C=C\3C(=O)NC4=C3C=C(F)C=C4	38.4327	16.5002
ML141	Rho	Cell Cycle	ML141 (CID-2950007), is demonstrated to be a potent, selective and reversible non-competitive inhibitor of Cdc42 GTPase suitable for in vitro assays, with IC50 of 200 nM and selectivity against other members of the Rho family of GTPases (Rac1, Rab2, Rab7).	407.49	71203-35-5	C22H21N3O3S	COC1=CC=C(C=C1)C2CC(=NN2C3=CC=C(C=C3)[S](N)(=O)=O)C4=CC=CC=C4	10.0346	9.77051
WAY-625135	Casein kinase 1δ	Metabolism	Casein kinase 1δ inhibitors	288.322	756865-45-9	C14H12N2O3S	COC1=CC2=C(C=C1)C(=CO2)CC(=O)NC3=NC=CS3	10.4514	-1.59617
WAY-333945	c-Met	Microbiology	anti-pathogenic infection ; inhibitors of c-Met;	351.382	689273-45-8	C17H13N5O2S	CC1=CC=C(C=C1)N2C(=O)NC3=C2N=C(N=C3C(N)=O)C4=CC=CS4	0.844224	45.913
WAY-388798	GPR40,histone deacetylase,mGluR5 receptor,tyrosine kinase	Endocrinology & Hormones，Epigenetics	agonists of free fatty acid receptor 1 (GPR40); histone deacetylase inhibitors; antiviral agents; metabotropic glutamate receptor antagonists; potentiating effect on the activity of antibiotics; immunomodulators for inducing cytokine biosynthesis; mGluR5 receptor antagonists; tyrosine kinase inhibitors;	200.645	63417-81-2	C7H5ClN2OS	ClCC1=NC(=NO1)C2=CC=CS2	-3.23004	2.7679
TP-3654	Pim	JAK/STAT	TP-3654 is the second-generation <b>PIM</b> inhibitor with K<sub>i</sub> values of 5 nM, 239 nM, and 42 nM for PIM-1, PIM-2 and PIM-3, respectively.	418.46	1361951-15-6	C22H25F3N4O_x000D_	CC(C)(O)C1CCC(CC1)NC2=N[N]3C(=NC=C3C4=CC=CC(=C4)C(F)(F)F)C=C2	22.0295	36.9512
Tomatidine	Others	antibacterial	A steroidal alkaloid that suppresses NF-κB signaling in LPS-stimulated macrophages, blocking induced expression of iNOS and COX-2; functional inhibitor of acid sphingomyelinase; antibacterial against S. aureus variants; prevents skeletal muscle atrophy as	452.113	6192-62-7	C27H46ClNO2	Cl.CC1CCC2(NC1)OC3CC4C5CCC6CC(O)CCC6(C)C5CCC4(C)C3C2C	2.25882	-14.0626
WAY-271127	MtSk	others	MtSk inhibitor	301.316	500149-26-8	C16H16FN3O2	CC1CN(CC(C)O1)C2=C(N=C(O2)C3=CC=CC=C3F)C#N	12.0221	-16.1676
Sitravatinib (MGCD516)	Ephrin receptor,c-Kit,TAM Receptor,VEGFR,Trk receptor	Protein Tyrosine Kinase	Sitravatinib (MGCD516) is a novel small molecule inhibitor targeting multiple RTKs involved in driving sarcoma cell growth, including c-Kit, PDGFRβ, PDGFRα, c-Met, and Axl.	629.68	1123837-84-2	C33H29F2N5O4S	COCCNCC1=CC=C(N=C1)C2=CC3=C(S2)C(=CC=N3)OC4=CC=C(NC(=O)C5(CC5)C(=O)NC6=CC=C(F)C=C6)C=C4F	31.301	9.48614
Salidroside	Others	Others	Salidroside, a phenylpropanoid glycoside isolated from Rhodiola rosea, has been reported to have a broad spectrum of pharmacological properties.	300.3	10338-51-9	C14H20O7	OCC1OC(OCCC2=CC=C(O)C=C2)C(O)C(O)C1O	18.2032	0.580299
Fasudil (HA-1077) HCl	Autophagy,ROCK	Cell Cycle	Fasudil(HA-1077), a potent and selective inhibitor of Rho kinase, displays less potent inhibiton over PKA, PKG, PKC and MLCK with Ki of 1.6, 1.6, 3.3, and 36 μM in cell-free assays, respectively.	327.83	105628-07-7	C14H18ClN3O2S	Cl.O=[S](=O)(N1CCCNCC1)C2=C3C=CN=CC3=CC=C2	35.4023	13.5136
CL-387785 (EKI-785)	EGFR	Protein Tyrosine Kinase	CL-387785 (EKI-785) is an irreversible, and selective EGFR inhibitor with IC50 of 370 pM.	381.23	194423-06-8	C18H13BrN4O	CC#CC(=O)NC1=CC2=C(NC3=CC=CC(=C3)Br)N=CN=C2C=C1	-38.3795	4.6075
TWS119	GSK-3	PI3K/Akt/mTOR	TWS119 is a GSK-3β inhibitor with IC50 of 30 nM in a cell-free assay capable of inducing neuronal differentiation and may be useful to stem cell biology.	318.33	601514-19-6	C18H14N4O2	NC1=CC(=CC=C1)C2=CC3=C([NH]2)N=CN=C3OC4=CC=CC(=C4)O	11.8336	14.7445
RN486	BTK	Angiogenesis	RN486 is a potent and selective BTK inhibitor with IC50 of 4 nM.	606.69	1242156-23-5	C35H35FN6O3	CN1CCN(CC1)C2=CN=C(NC3=CC(=CN(C)C3=O)C4=CC=CC(=C4CO)N5C=CC6=CC(=CC(=C6C5=O)F)C7CC7)C=C2	41.5243	9.36665
BMS-5	LIM kinase	Cell Cycle	BMS-5 (LIMKi 3) is a potent inhibitor of LIM kinases (LIMK) with IC50 of 7 nM and 8 nM for LIMK1 and LIMK2, respectively.	431.29	1338247-35-0	C17H14Cl2F2N4OS_x000D_	CC(C)C(=O)NC1=NC=C(S1)C2=CC(=N[N]2C3=C(Cl)C=CC=C3Cl)C(F)F	5.93649	0.304914
Defactinib (VS-6063, PF-04554878)	FAK	Angiogenesis	Defactinib (VS-6063, PF-04554878) is a selective, and orally active FAK inhibitor. Phase 2.	510.49	1073154-85-4	C20H21F3N8O3S	CNC(=O)C1=CC=C(NC2=NC(=C(C=N2)C(F)(F)F)NCC3=C(N=CC=N3)N(C)[S](C)(=O)=O)C=C1	26.3662	-20.4927
Selective PI3Kδ Inhibitor 1 (compound 7n)	PI3K	PI3K/Akt/mTOR	Selective PI3Kδ Inhibitor 1 (compound 7n) is an inhibitor of <b>PI3Kδ</b> with an IC50 of 0.9 nM and >1000-fold selectivity against other class I PI3K isoforms [PI3K α/γ/β=3670/1460/21300 nM].	429.45	2088525-31-7	C23H20FN7O_x000D_	C[N]1N=C(N=C1C2(CC2)C3=CC=CC=C3)C4=CN=C(N)C(=N4)C5=CC(=C(C=C5)C(N)=O)F	19.6305	19.1395
AZ191	DYRK	Protein Tyrosine Kinase	AZ191 is a potent and selective DYRK1B inhibitor with IC50 of 17 nM in a cell-free assay, about 5- and 110-fold selectivity over DYRK1A and DYRK2, respectively.	429.52	1594092-37-1	C24H27N7O	COC1=CC(=CC=C1NC2=NC=CC(=N2)C3=C[N](C)C4=CN=CC=C34)N5CCN(C)CC5	34.9309	21.7669
Capmatinib (INCB28060)	c-Met	Protein Tyrosine Kinase	Capmatinib (INCB28060) is a novel, ATP-competitive inhibitor of c-MET with IC50 of 0.13 nM in a cell-free assay, inactive against RONβ, as well as EGFR and HER-3. Phase 1.	412.42	1029712-80-8	C23H17FN6O	CNC(=O)C1=CC=C(C=C1F)C2=N[N]3C(=CN=C3N=C2)CC4=CC=C5N=CC=CC5=C4	1.536	-22.2108
2-D08	c-RET,SUMO,TAM Receptor,IL Receptor,PI3K,VEGFR,GSK-3	Ubiquitin	2-D08 is a cell permeable, mechanistically unique inhibitor of protein sumoylation. It is also inhibits Axl, IRAK4, ROS1, MLK4, GSK3β, RET, KDR and PI3Kα with IC50 values of 0.49, 3.9, 5.3, 9.8, 11, 11, 17 and 35 nM respectively in biochemical assays.	270.24	144707-18-6	C15H10O5	OC1=CC=C(C(=C1O)O)C2=CC(=O)C3=CC=CC=C3O2	25.7155	16.6397
Dasatinib Monohydrate	Src,c-Kit,Bcr-Abl	Angiogenesis	Dasatinib Monohydrate is a novel, potent and multi-targeted inhibitor that targets Abl, Src and c-Kit, with IC50 of <1 nM, 0.8 nM and 79 nM, respectively.	506.02	863127-77-9	C22H28ClN7O3S	O.CC1=NC(=CC(=N1)NC2=NC=C(S2)C(=O)NC3=C(C)C=CC=C3Cl)N4CCN(CCO)CC4	-4.59813	10.1143
GNF-7	Bcr-Abl	Angiogenesis	GNF-7 is a potent type-II kinase Bcr-Abl inhibitor with IC50 of <5 nM, 61 nM, 122 nM, 136 nM, and 133 nM for M351T, T315I, E255 V, G250E, and c-Abl, respectively.	547.53	839706-07-9	C28H24F3N7O2	CN1C(=O)N(CC2=CN=C(NC3=CC=C(C)N=C3)N=C12)C4=CC(=CC=C4C)NC(=O)C5=CC=CC(=C5)C(F)(F)F	58.5953	17.5073
WAY-114506	protein kinase A	others	amyloid beta modulators; inhibitors of A kinase anchor protein/protein kinase A interaction;	258.274	1164500-43-9	C10H18N4O4	CCN1C2C(N(CO)C1=O)N(CO)C(=O)N2CC	8.63207	23.2963
WAY-636982	Aurora kinase A	Cell Cycle & Epigenetics	Aurora kinase A inhibitor	226.229	834-45-7	C10H14N2O4	OC(=O)CN1C(=O)NC2(CCCCC2)C1=O	6.54322	4.22997
ZD-4190	VEGFR	Protein Tyrosine Kinase	ZD-4190 is a submicromolar inhibitor of VEGF RTK activity in vitro with IC50 values of 29 ± 4 nM and 708 ± 63 nM for KDR and Flt-1, respectively.	459.27	413599-62-9	C19H16BrFN6O2_x000D_	COC1=CC2=C(NC3=CC=C(Br)C=C3F)N=CN=C2C=C1OCC[N]4C=CN=N4	32.5305	28.1245
Ferulic Acid	Others	Others	Ferulic Acid is a hydroxycinnamic acid and a type of organic compound found in the Ferula assafoetida L. or Ligusticum chuanxiong.	194.19	1135-24-6	C10H10O4	COC1=CC(=CC=C1O)\C=C\C(O)=O	24.4176	13.186
Gentisic acid	Immunology & Inflammation related	Immunology & Inflammation	Gentisic acid, an active metabolite of salicylic acid degradation, has a broad spectrum of biological activity, such as anti-inflammatory, antirheumatic and antioxidant properties.	154.12	490-79-9	C7H6O4	OC(=O)C1=C(O)C=CC(=C1)O	13.252	8.05848
WAY-304800-A	Casein kinase 1δ	Metabolism	Casein kinase 1δ inhibitors	299.348	345616-08-2	C15H13N3O2S	CC1=C(C)C2=C(S1)N=CN=C2NC3=CC=C4OCOC4=C3	14.6444	3.87895
RG 13022	EGFR	Protein Tyrosine Kinase	RG-13022 inhibits the autophosphorylation reaction of the <b>EGF receptor</b> in immunoprecipitates with IC50 of 4 µM.	266.29	136831-48-6	C16H14N2O2_x000D_ _x000D_	COC1=CC=C(C=C1OC)\C=C(C#N)/C2=CC=CN=C2	50.9175	26.0891
Phellodendrine	Others	Others	Phellodendrine can suppress local semisyngeneic GvH reactions and systemic allogeneic GvH reactions in X-ray irradiated recipient mice, it also can suppress the induction phase of sheep red blood cell (SRBC)-induced delayed type hypersensitivity in mice and tuberculin-induced delayed type hypersensitivity in guinea pigs, suggests that phellodendrine is expected to be a valuable new type of immuno…	342.409	6873-13-8	C20H24NO4+	COC1=C(O)C=C2C3CC4=C(C[N+]3(C)CCC2=C1)C=C(OC)C(=C4)O	0.537118	17.0946
AMG-458	c-Met	Protein Tyrosine Kinase	AMG 458 is a potent c-Met inhibitor with Ki of 1.2 nM, ~350-fold selectivity for c-Met than VEGFR2 in cells.	539.58	913376-83-7	C30H29N5O5	COC1=CC2=NC=CC(=C2C=C1)OC3=CN=C(NC(=O)C4=C(C)N(CC(C)(C)O)N(C4=O)C5=CC=CC=C5)C=C3	30.3615	10.0112
WAY-351429	choline kinase	others	choline kinase inhibitors	381.425	451474-95-6	C21H23N3O4	COC1=C(CNC(=O)CN2C(=O)NC(C)(C2=O)C3=CC=C(C)C=C3)C=CC=C1	-8.92958	26.5199
BI-3406	Ras	Cell Cycle	BI-3406 (compound I-6) is a potent, selective and orally active inhibitor of the interaction between KRAS and Son of Sevenless 1 (SOS1) with IC50 of 6 nM. BI-3406 reduces the formation of GTP-loaded KRAS, and inhibits MAPK pathway signaling. BI-3406 exhibits anti-tumor activities.	462.46	2230836-55-0	C23H25F3N4O3_x000D_	COC1=C(OC2CCOC2)C=C3C(=NC(=NC3=C1)C)NC(C)C4=CC(=CC(=C4)N)C(F)(F)F	28.8816	-8.08728
WDR5-0103	Histone Methyltransferase	Epigenetics	WDR5-0103 is a small-molecule antagonist of <b>WDR5 (WD40 repeat protein 5)</b> with Kd of 450 nM.	383.44	890190-22-4	C21H25N3O4_x000D_ _x000D_	COC(=O)C1=CC=C(N2CCN(C)CC2)C(=C1)NC(=O)C3=CC=CC(=C3)OC	-0.824402	19.671
WAY-606954	GSK3	PI3K/Akt/mTOR & Stem Cells & Wnt	inhibitor of GSK3 kinases	308.378	748145-12-2	C18H20N4O	CC1=N[NH]C2=C1C(C3=NC=CC=C3)C4=C(CC(C)(C)CC4=O)N2	-8.20301	14.1576
EHop-016	Rho	Cell Cycle	EHop-016 is a specific Rac GTPase inhibitor with IC50 of 1.1 μM for Rac1 in MDA-MB-435 and MDA-MB-231 cells, equally potent inhibition for Rac3.	430.55	1380432-32-5	C25H30N6O	CC[N]1C2=C(C=CC=C2)C3=C1C=CC(=C3)NC4=NC(=NC=C4)NCCCN5CCOCC5	17.0001	17.9819
BIO-acetoxime	GSK-3	PI3K/Akt/mTOR	BIO-acetoxime is a potent dual GSK3α/β inhibitor with IC50 of 10 nM, >240-fold selectivity over CDK5/p25, CDK2/cyclin A and CDK1/cyclin B.	398.21	667463-85-6	C18H12BrN3O3	CC(=O)O\N=C/1\C(NC2=CC=CC=C12)=C3\C(=O)NC4=C3C=CC(=C4)Br	100.352	21.1524
Shikonin	Chloride Channel,Anti-infection	Microbiology	Shikonin, a potent and specific Pyruvate kinase M2 (PKM2) inhibitor, is a major component of zicao (purple gromwell, the dried root of Lithospermum erythrorhizon), a Chinese herbal medicine with various biological activities. It is also an inhibitor of TMEM16A chloride channel activity using cell-based fluorescent-quenching assay.	288.3	517-89-5	C16H16O5	CC(C)=CCC(O)C1=CC(=O)C2=C(O)C=CC(=C2C1=O)O	54.8284	11.6418
Methyl-Hesperidin	Others	Others	Methyl Hesperidin is a flavanone glycoside (flavonoid) (C28H34O15) found abundantly in citrus fruits. Its aglycone form is called hesperetin.	624.59	11013-97-1	C29H38O16	COC1=CC=C(C=C1O)C2CC(=O)C3=C(OC)C=C(OC4OC(COC5OC(C)C(O)C(O)C5O)C(O)C(O)C4O)C=C3O2	32.7717	8.2459
Loureirin A	Akt	PI3K/Akt/mTOR	Loureirin A is a flavonoid extracted from the red resin of the herbs of Dracaena cochinchinensis, which is known as Dragon's Blood. Loureirin A inhibits platelet activation by an impairment of PI3K/Akt signaling. Loureirin A inhibits Akt phosphorylation.	286.32	119425-89-7	C17H18O4_x000D_	COC1=CC=C(CCC(=O)C2=CC=C(O)C=C2)C(=C1)OC	26.2727	18.5216
WAY-270329	protein kinase	others	inhibitor of protein kinases	423.463	721964-51-8	C21H18FN5O2S	CCOC1=CC=C(C=C1)C2=NN=C3C=CC(=N[N]23)SCC(=O)NC4=CC=C(F)C=C4	1.05426	39.846
WAY-620099	tyrosine kinase,PI3K,phosphodiesterase V	Protein Tyrosine Kinase ,PI3K/Akt/mTOR	tyrosine kinase inhibitor; modulators of phosphoinositide 3-kinase; inhibiting neoplastic cell growth; phosphodiesterase V inhibitor;	301.794	128277-24-7	C15H12ClN3S	ClC1=C2C3=C(CCCC3)SC2=NC(=N1)C4=CN=CC=C4	27.5481	15.7536
CHIR-99021 (CT99021)	GSK-3	PI3K/Akt/mTOR	CHIR-99021 (CT99021) is a GSK-3α and GSK-3β inhibitor with IC50 of 10 nM and 6.7 nM, respectively. CHIR99201 does not exhibit cross-reactivity against cyclin-dependent kinases (CDKs) and shows a 350-fold selectivity toward GSK-3β compared to CDKs.	465.34	252917-06-9	C22H18Cl2N8	CC1=C[NH]C(=N1)C2=CN=C(NCCNC3=CC=C(C=N3)C#N)N=C2C4=CC=C(Cl)C=C4Cl	8.88344	6.95387
Lapatinib ditosylate monohydrate	Others	Others	Lapatinib Ditosylate is the ditosylate salt of lapatinib, a synthetic, orally-active quinazoline with potential antineoplastic activity. Lapatinib reversibly blocks phosphorylation of the epidermal growth factor receptor (EGFR), ErbB2, and the Erk-1 and-2 and AKT kinases; it also inhibits cyclin D protein levels in human tumor cell lines and xenografts. EGFR and ErbB2 have been implicated in the …	943.476	388082-78-8	C43H44ClFN4O11S3	O.CC1=CC=C(C=C1)[S](O)(=O)=O.CC2=CC=C(C=C2)[S](O)(=O)=O.C[S](=O)(=O)CCNCC3=CC=C(O3)C4=CC5=C(C=C4)N=CN=C5NC6=CC(=C(OCC7=CC(=CC=C7)F)C=C6)Cl	10.1398	6.06645
WAY-603264	adenosine kinase	GPCR & G Protein	adenosine kinase inhibitors	184.259	58350-40-6	C8H12N2OS	CC1=CSC(=N1)N2CCOCC2	-16.5787	16.9115
N-Acetyl-5-hydroxytryptamine	Trk receptor	Protein Tyrosine Kinase & Neuronal Signaling	N-Acetyl-5-hydroxytryptamine (NAS, N-Acetylserotonin, Normelatonin, O-Demethylmelatonin), a precursor of melatonin, is a potent and selective agonist of <b>TrkB receptor</b>.</p>	218.25	1210-83-9	C12H14N2O2_x000D_	CC(=O)NCCC1=C[NH]C2=C1C=C(O)C=C2	10.996	4.41845
K-Ras(G12C) inhibitor 9	Rho	Cell Cycle	K-Ras(G12C) inhibitor 9 is an allosteric inhibitor of oncogenic K-Ras(G12C).	513.78	1469337-91-4	C16H21ClIN3O4S	COC1=CC(=C(I)C=C1NCC(=O)N2CCC(CC2)N[S](=O)(=O)C=C)Cl	14.6663	20.1001
SGI-7079	VEGFR	Protein Tyrosine Kinase	SGI-7079, a novel selective Axl inhibitor with an IC50 of 58 nM in vitro, inhibits tumor growth in a dose dependent manner and is a potential therapeutic target for overcoming EGFR inhibitor resistance.	455.53	1239875-86-5	C26H26FN7	CN1CCN(CC1)C2=CC=C(NC3=NC4=C(C(=C[NH]4)C)C(=N3)C5=CC(=CC=C5)CC#N)C=C2F	34.59	44.8158
PF-06447475	LRRK2	Autophagy	PF-06447475 is a potent, selective, and brain penetrant LRRK2 kinase inhibitor with IC50 of 3 nM.	305.33	1527473-33-1	C17H15N5O	N#CC1=CC=CC(=C1)C2=C[NH]C3=NC=NC(=C23)N4CCOCC4	29.9893	-5.17126
MLi-2	LRRK2	Autophagy	MLi-2 is an orally active and highly selective inhibitor of LRRK2. MLi-2 exhibits exceptional potency in a purified LRRK2 kinase assay in vitro with IC50 of 0.76 nM, a cellular assay monitoring dephosphorylation of LRRK2 pSer935 LRRK2 with IC50 of 1.4 nM, and a radioligand competition binding assay with IC50 of 3.4 nM.	379.46	1627091-47-7	C21H25N5O2_x000D_	CC1CN(CC(C)O1)C2=CC(=NC=N2)C3=N[NH]C4=CC=C(OC5(C)CC5)C=C34	35.98	-3.87879
NVP-BVU972	c-Met	Protein Tyrosine Kinase	NVP-BVU972 is a selective and potent Met inhibitor with IC50 of 14 nM.	340.38	1185763-69-2	C20H16N6	C[N]1C=C(C=N1)C2=N[N]3C(=CN=C3C=C2)CC4=CC=C5N=CC=CC5=C4	33.6206	26.6283
Gilteritinib (ASP2215)	FLT3,TAM Receptor	Protein Tyrosine Kinase	Gilteritinib(ASP2215) is a small-molecule FLT3/AXL inhibitor with IC50 values of 0.29 nM and 0.73 nM for FLT3 and AXL, respectively. It inhibits FLT3 at an IC50 value that was approximately 800-fold more potent than the concentration required to inhibit c-KIT (230 nM).	552.71	1254053-43-4	C29H44N8O3	CCC1=NC(=C(NC2=CC=C(N3CCC(CC3)N4CCN(C)CC4)C(=C2)OC)N=C1NC5CCOCC5)C(N)=O	-17.7135	27.5868
Harmine	PPAR,MAO	Metabolism	Harmine is an alkaloid of the β-carboline family that regulates PPARγ expression through inhibition of the Wnt signaling pathway. It also selectively binds to MAO-A and reversibly inhibits monoamine oxidase A (MAO-A) but not the variant MAO-B.	212.25	442-51-3	C13H12N2O	COC1=CC2=C(C=C1)C3=CC=NC(=C3[NH]2)C	34.1392	5.79321
Nilotinib hydrochloride monohydrate	Bcr-Abl	Angiogenesis	Nilotinib (AMN-107, Tasigna) hydrochloride monohydrate is a selective and orally bioavailable inhibitor of <b>Bcr-Abl</b> with IC50 < 30 nM in Murine myeloid progenitor cells. Nilotinib induces <b>autophagy</b> through <b>AMPK</b> activition.	583.99	923288-90-8	C28H25ClF3N7O2_x000D_	O.Cl.CC1=C[N](C=N1)C2=CC(=CC(=C2)NC(=O)C3=CC(=C(C)C=C3)NC4=NC=CC(=N4)C5=CN=CC=C5)C(F)(F)F	21.2949	30.9396
FLLL32	JAK	JAK/STAT	FLLL32 is a potent JAK2/STAT3 inhibitor with IC50 of <5 μM.	464.55	1226895-15-3	C28H32O6	COC1=CC=C(/C=C/C(=O)C2(CCCCC2)C(=O)\C=C\C3=CC(=C(OC)C=C3)OC)C=C1OC	12.9434	8.20291
WAY-311474	MtSk	Others	altering the lifespan of eukaryotic organisms; MtSk inhibitors;	274.341	569313-77-5	C13H14N4OS	C[N]1C=NN=C1SCC(=O)N2CCC3=C2C=CC=C3	12.9366	-0.0534985
Acetylcysteine	TNF-alpha,ROS	Apoptosis	Acetylcysteine(N-acetyl-l-cysteine) is a ROS(reactive oxygen species) inhibitor that antagonizes the activity of proteasome inhibitors. It is also a tumor necrosis factor production inhibitor, used mainly as a mucolytic, protects against acetaminophen overdose-induced hepatotoxicity by maintaining or restoring hepatic concentrations of glutathione.	163.19	616-91-1	C5H9NO3S	CC(=O)NC(CS)C(O)=O	9.79396	18.1919
A-83-01	ALK	Protein Tyrosine Kinase	A-83-01 is a potent inhibitor of <b>TGF-β type I receptor (ALK5-TD)</b> with IC50 of 12 nM. A-83-01 also inhibits the transcription induced by <b>activin/nodal type I receptor (ALK4-TD)</b> and <b>nodal type I receptor (ALK7-TD)</b> with IC50 of 45 nM and 7.5 nM, respectively.<span style='color:#FF0000;font-weight:bold;'>Solutions are best fresh-prepared.</span>	421.52	909910-43-6	C25H19N5S_x000D_	CC1=CC=CC(=N1)C2=N[N](C=C2C3=CC=NC4=CC=CC=C34)C(=S)NC5=CC=CC=C5	44.5705	24.9552
WAY-616584	Casein kinase 1δ	Metabolism	Casein kinase 1δ inhibitors; Casein kinase 1δ inhibitors;	311.358	695223-53-1	C16H13N3O2S	C1CC2=C(C1)C3=C(S2)N=CN=C3NC4=CC5=C(OCO5)C=C4	-0.399757	4.0514
ARN-3236	SIK	Immunology & Inflammation	ARN-3236 is a potent, orally available and selective inhibitor of salt-inducible kinase 2 (SIK2) with IC50 of <1 nM, 21.63 nM and 6.63 nM for SIK2, SIK1 and SIK3, respectively. ARN-3236 induces apoptosis in cancer cells.	336.41	1613710-01-2	C19H16N2O2S_x000D_	COC1=CC(=C(C=C1)C2=C[NH]C3=NC=CC(=C23)C4=CSC=C4)OC	61.8444	47.8661
Neferine	Others	Others	Neferine, a natural component of Nelumbo nucifera, has antitumor efficiency in cancer.	624.77	2292-16-2	C38H44N2O6	COC1=CC=C(CC2N(C)CCC3=C2C=C(OC4=CC(=CC=C4O)CC5N(C)CCC6=C5C=C(OC)C(=C6)OC)C(=C3)OC)C=C1	22.3049	15.4387
PIK-293	PI3K	PI3K/Akt/mTOR	PIK-293 is a PI3K inhibitor, mostly for PI3Kδ with IC50 of 0.24 μM, 500-, 100- and 50-fold less potent to PI3Kα/β/γ, respectively.	397.43	900185-01-5	C22H19N7O	CC1=C(C=CC=C1)N2C(=NC3=C(C(=CC=C3)C)C2=O)C[N]4N=CC5=C4N=CN=C5N	8.44678	-4.3555
Dehydrocorydalin	Bcl-2	Bcl-2	Dehydrocorydaline exerts anti-metastatic potential via suppression of MMPs and Bcl-2 signaling in NSCLC cells. Dehydrocorydaline stimulates p38 MAPK activation, which can enhance heterodimerization of MyoD and E proteins, thus resulting in MyoD activation and myoblast differentiation. Dehydrocorydaline shows antiplatelet effects, it inhibits thrombin-induced platelet aggregation in a low dose ( I…	366.43	30045-16-0	C22H24NO4+	COC1=CC=C2C(=C3C4=C(CC[N+]3=CC2=C1OC)C=C(OC)C(=C4)OC)C	-7.85935	19.0669
WAY-606956	GSK3	PI3K/Akt/mTOR & Stem Cells & Wnt	inhibitor of GSK3 kinases	308.378	748145-19-9	C18H20N4O	CC1=N[NH]C2=C1C(C3=CN=CC=C3)C4=C(CC(C)(C)CC4=O)N2	-18.3952	19.5232
WAY-604116	sphingosine kinase,11β-hydroxysteroid dehydrogenase	GPCR & G Protein	sphingosine kinase inhibitors; 11β-hydroxysteroid dehydrogenase inhibitors; altering the lifespan of a eukaryotic organism;	270.369	121768-39-6	C17H22N2O	O=C(NCC1=CC=NC=C1)[C]23C[CH]4[CH2]C([CH2][CH](C4)C2)C3	2.54885	-13.0303
SRPIN340	Others	Others	SRPIN340 is a selective SRPK inhibitor with Ki of 0.89 μM for SRPK1, showing no significant inhibitory activity against more than 140 other kinases..	349.35	218156-96-8	C18H18F3N3O	FC(F)(F)C1=CC(=C(C=C1)N2CCCCC2)NC(=O)C3=CC=NC=C3	25.0171	6.71236
H-1152 dihydrochloride	Aurora Kinase	Cell Cycle	H-1152 dihydrochloride (2HCl) is a membrane-permeable and selective inhibitor of Rho-associated protein kinase (ROCK). H-1152 inhibits ROCK2, PKA, PKC, PKG, AuroraA and CaMK2 with IC50 of 0.0120 μM, 3.03 μM, 5.68 μM, 0.360 μM, 0.745 μM and 0.180 μM, respectively.	392.34	871543-07-6	C16H23Cl2N3O2S_x000D_	Cl.Cl.CC1CNCCCN1[S](=O)(=O)C2=CC=CC3=C2C(=CN=C3)C	0.626245	-13.9072
WAY-312567	Mycobacterium tuberculosis shikimate kinase	Microbiology	Mycobacterium tuberculosis shikimate kinase inhibitors	304.407	330955-59-4	C16H20N2O2S	OC(=O)CCSC1=NC2=C(C=CC=C2)[N]1C3CCCCC3	25.3798	4.53915
Vidarabine	DNA/RNA Synthesis	DNA Damage	Vidarabine is an antiviral drug by interfering with the synthesis of viral DNA, used to treat herpes simplex and varicella zoster viruses.	267.24	5536-17-4	C10H13N5O4	NC1=C2N=C[N](C3OC(CO)C(O)C3O)C2=NC=N1	23.786	15.6917
Nifedipine	Calcium Channel	Transmembrane Transporters	Nifedipine is a dihydropyridine calcium channel blocker, used to lower hypertension and to treat angina.	346.33	21829-25-4	C17H18N2O6	COC(=O)C1=C(C)NC(=C(C1C2=C(C=CC=C2)[N+]([O-])=O)C(=O)OC)C	10.4371	0.473049
KY1220	Wnt/beta-catenin	Stem Cells & Wnt	KY1220 is a small molecule that destabilizes both β-catenin and Ras, via targeting the Wnt/β-catenin pathway with IC50 of 2.1 μM in HEK293 reporter cells.	314.32	292168-79-7	C14H10N4O3S_x000D_	[O-][N+](=O)C1=CC=C(C=C1)[N]2C=CC=C2\C=C\3NC(=S)NC3=O	67.0054	9.31679
Coumarin-3-carboxylic acid	MAOB - monoamine oxidase B	Others	Inhibition of MAO-B	190.152	531-81-7	C10H6O4	OC(=O)C1=CC2=C(OC1=O)C=CC=C2	-0.731051	24.7908
SSR128129E	FGFR	Angiogenesis	SSR128129E is an orally-active and allosteric FGFR1 inhibitor with IC50 of 1.9 μM, while not affecting other related RTKs.	346.31	848318-25-2	C18H15N2NaO4	COC1=C2C=CC=C[N]2C(=C1C)C(=O)C3=CC=C(N)C(=C3)C(=O)O[Na]	3.55415	6.66105
BC1618	AMPK	PI3K/Akt/mTOR	BC1618 is an orally active Fbxo48 inhibitor that stimulates adenosine monophosphate (AMP)-activated protein kinase (Ampk)-dependent signaling. BC1618 promotes mitochondrial fission, facilitates autophagy and improves hepatic insulin sensitivity.	415.45	2222094-18-8	C24H24F3NO2_x000D_	OC(COC1=CC=C(C=C1)C(F)(F)F)CN(CC2=CC=CC=C2)CC3=CC=CC=C3	21.1534	6.7
WAY-332616	pyruvate kinase	Metabolism	Inhibitors of pyruvate kinase	301.36	904457-46-1	C16H15NO3S	CC(C)NC(=O)C1=CC2=C(S1)C3=CC(=CC=C3OC2=O)C	8.55051	-0.279513
WAY-634964	tyrosine kinase	Protein Tyrosine Kinase	tyrosine kinase inhibitors	189.171	157842-34-7	C9H7N3O2	[O-][N+](=O)C1=CN=C(C=C1)[N]2C=CC=C2	2.09153	7.34664
WAY-333939	c-Met	Microbiology	anti-pathogenic infection ; inhibitors of c-Met;	351.402	689268-14-2	C19H21N5O2	CC1=CC=C(C=C1)N2C(=O)NC3=C2N=C(N=C3C(N)=O)C4CCCCC4	-1.84889	59.2114
Ningetinib	c-Met	Protein Tyrosine Kinase	Ningetinib is a potent, orally bioavailable inhibitor of tyrosine kinase with IC50 of 6.7 nM, 1.9 nM and <1.0 nM for c-Met, VEGFR2 and Axl, respectively. Ningetinib exhibits antitumor activity.	556.58	1394820-69-9	C31H29FN4O5_x000D_	CN1N(C(=O)C(=C1C)C(=O)NC2=CC(=C(OC3=C4C=CC(=CC4=NC=C3)OCC(C)(C)O)C=C2)F)C5=CC=CC=C5	18.3144	20.3078
AZ32	ATM/ATR	DNA Damage	AZ32 is a specific inhibitor of the <b>ATM kinase</b> that possesses good BBB penetration in mouse with an IC50 value of <0.0062 μM for ATM enzyme. It shows adequate selectivity over ATR and also has high cell permeability.	328.37	No CAS	C20H16N4O	CNC(=O)C1=CC=C(C=C1)C2=CN=C3C=NC(=C[N]23)C4=CC=CC=C4	38.1664	21.2009
Kaempferol-3-O-glucorhamnoside	Others	Others	Kaempferol 3-neohesperidoside, isolated from the herbs of Delphinium grandiflorum L., has insulin-like properties in terms of glucose lowering.	594.52	40437-72-7	C27H30O15	CC1OC(OC2C(O)C(O)C(CO)OC2OC3=C(OC4=CC(=CC(=C4C3=O)O)O)C5=CC=C(O)C=C5)C(O)C(O)C1O	0.381472	-33.9657
R112	Syk	Angiogenesis	R112 is an ATP-competitive spleen tyrosine kinase (Syk) inhibitor with Ki value of 96 nM.	312.3	575474-82-7	C16H13FN4O2_x000D_	OC1=CC=CC(=C1)NC2=NC=C(F)C(=N2)NC3=CC(=CC=C3)O	14.8306	30.1757
Benzylacetone	Others	Others	4-Phenylbutan-2-one is a model compound for the preparation of fragrances.	148.202	2550-26-7	C10H12O	CC(=O)CCC1=CC=CC=C1	-0.559904	13.5598
Verbascoside	Immunology & Inflammation related	Immunology & Inflammation	Verbascoside, a phenylpropanoid glycoside from lemon verbena, has several biological properties such as anti-inflammatory, antimicrobial, antitumor, and antioxidant.	624.59	61276-17-3	C29H36O15	CC1OC(OC2C(O)C(OCCC3=CC=C(O)C(=C3)O)OC(CO)C2OC(=O)\C=C\C4=CC=C(O)C(=C4)O)C(O)C(O)C1O	18.5462	13.4793
Fruquintinib	VEGFRs	VEGFR	Fruquintinib is a highly potent and selective VEGFR 1/2/3 inhibitor.	393.39	1194506-26-7	C21H19N3O5	CNC(=O)C1=C(C)OC2=CC(=CC=C12)OC3=C4C=C(OC)C(=CC4=NC=N3)OC	5.88226	-0.973981
Carnosol	Others	cancer	One of the phenolic antioxidants present in extracts of rosemary; inhibits the formation of tumors derived using irritants such as TPA and DMBA	330.418	5957-80-2	C20H26O4	CC(C)C1=CC2=C(C(=C1O)O)C34CCCC(C)(C)C3CC2OC4=O	21.8551	6.8123
WAY-333184	GSK-3b	PI3K/Akt/mTOR,Stem Cells,Wnt	inhibitors of glycogen synthase kinase-3b (GSK-3b)	283.388	863004-48-2	C17H17NOS	CC1CC(=O)N(CC2=CC=CC=C2)C3=C(S1)C=CC=C3	3.98513	7.03441
WAY-114228	MEK1	MAPK	MEK1 Inhibitors	305.413	333325-96-5	C21H23NO	CC1=CC=C(C=C1)C2CC(=O)C=C(C2)NCCC3=CC=CC=C3	4.0993	23.3017
Dorzagliatin	Carbohydrate Metabolism	Metabolism	Dorzagliatin (HMS-5552, RO-5305552, Sinogliatin) is a dual-acting <b>glucokinase (GK)</b> activator that improves glycaemic control and pancreatic β-cell function in patients with type 2 diabetes.	462.93	1191995-00-2	C22H27ClN4O5_x000D_	CC(C)CC(N1CC(=CC1=O)OC2=CC=CC=C2Cl)C(=O)NC3=N[N](CC(O)CO)C=C3	14.605	0.753494
WAY-646458	Casein kinase 1d	Metabolism	Casein kinase 1d inhibitors	262.263	852413-92-4	C16H10N2O2	O1C2=C(C=CC=C2)C3=C1C=CC(=C3)OC4=NC=CC=N4	10.4547	-3.57973
Kaempferol-3-O-rutinoside	Apoptosis related	JAK/STAT	Kaempferol-3-O-rutinoside (Nicotiflorin, Nikotoflorin, Kaempferol 3-O-β-rutinoside), a flavonoid extracted from Carthamus tinctorius, alters the shape and structure of injured neurons, decreases the number of apoptotic cells, down-regulates expression of p-JAK2, p-STAT3, caspase-3, and Bax and decreases Bax immunoredactivity, and increases Bcl-2 protein expression and immunoreactivity.	594.52	17650-84-9	C27H30O15_x000D_	CC1OC(OCC2OC(OC3=C(OC4=C(C(=CC(=C4)O)O)C3=O)C5=CC=C(O)C=C5)C(O)C(O)C2O)C(O)C(O)C1O	31.3884	14.9567
WAY-271413	GSK-3β	PI3K/Akt/mTOR,Stem Cells , Wnt	GSK-3β inhibitor	393.416	536731-65-4	C20H15N3O4S	COC1=CC(=CC=C1)C2=CSC(=N2)NC(=O)CN3C(=O)C4=C(C=CC=C4)C3=O	8.30028	36.6402
Fedratinib (SAR302503, TG101348)	JAK	JAK/STAT	Fedratinib (SAR302503, TG101348) is a selective inhibitor of JAK2 with IC50 of 3 nM in cell-free assays, 35- and 334-fold more selective for JAK2 versus JAK1 and JAK3. Phase 2.	524.68	936091-26-8	C27H36N6O3S	CC1=C(NC2=CC=CC(=C2)[S](=O)(=O)NC(C)(C)C)N=C(NC3=CC=C(OCCN4CCCC4)C=C3)N=C1	14.5814	25.8438
LDN-212854	TGF-beta/Smad	TGF-beta/Smad	LDN-212854 is a potent and selective BMP receptor inhibitor with IC50 of 1.3 nM for ALK2, about 2-, 66-, 1641-, and 7135-fold selectivity over ALK1, ALK3, ALK4, and ALK5, respectively.	406.48	1432597-26-6	C25H22N6	C1CN(CCN1)C2=CC=C(C=C2)C3=C[N]4N=CC(=C4N=C3)C5=CC=CC6=C5C=CC=N6	61.5658	15.2305
PD0325901	MEK	MAPK	PD0325901 is a selective and non ATP-competitive MEK inhibitor with IC50 of 0.33 nM in cell-free assays, roughly 500-fold more potent than CI-1040 on phosphorylation of ERK1 and ERK2. Phase 2.	482.19	391210-10-9	C16H14F3IN2O4	OCC(O)CONC(=O)C1=C(NC2=CC=C(I)C=C2F)C(=C(F)C=C1)F	-1.75706	-12.3633
Acetosyringone	Others	Others	Acetosyringone is a phenolic natural product with analgesic, antipyretic and anti-inflammatory actions.	196.20	2478-38-8	C10H12O4	COC1=CC(=CC(=C1O)OC)C(C)=O	30.9509	5.8306
Metformin	AMPK	PI3K/Akt/mTOR	Metformin (1,1-Dimethylbiguanide), a widely used drug for treatment of type 2 diabetes, activates <b>AMP-activated protein kinase (AMPK)</b> in hepatocytes. Metformin promotes <b>mitophagy</b> in mononuclear cells. Metformin induces <b>apoptosis</b> of lung cancer cells through activating <b>JNK/p38 MAPK</b> pathway and GADD153.	129.16	657-24-9	C4H11N5_x000D_	CN(C)C(=N)NC(N)=N	11.3772	0.888613
WAY-310819	B-Raf	MAPK	B-Raf Inhibitors; B-Raf Inhibitors;	424.272	326918-98-3	C15H14BrN5O3S	CN1C(=O)NC(=O)C2=C1N=C(SCC(N)=O)[N]2CC3=CC(=CC=C3)Br	8.34576	6.23682
WAY-225588	GRK6	GPCR & G Protein	inhibitors of G protein coupled receptor 6 kinase (GRK6)	277.32	6765-52-2	C17H15N3O	CC1=CC=C(C=C1)C2C3=C(OC(=C2C#N)N)C=C(N)C=C3	11.3614	33.1434
Skepinone-L	p38 MAPK	MAPK	Skepinone-L is a selective p38α-MAPK inhibitor with IC50 of 5 nM.	425.42	1221485-83-1	C24H21F2NO4	OCC(O)COC1=CC=C2CCC3=CC(=CC=C3C(=O)C2=C1)NC4=CC=C(F)C=C4F	21.5556	8.05874
WAY-612453	Mycobacterium tuberculosis shikimate kinase	Microbiology	Mycobacterium tuberculosis shikimate kinase inhibitors	275.158	300809-10-3	C9H8Cl2N4S	C[N]1N=NN=C1SCC2=C(Cl)C=CC=C2Cl	-12.4916	-9.85505
GW788388	TGF-beta/Smad	TGF-beta/Smad	GW788388 is a potent and selective inhibitor of ALK5 with IC50 of 18 nM in a cell-free assay, also inhibits TGF-β type II receptor and activin type II receptor activities, but does not inhibit BMP type II receptor.	425.48	452342-67-5	C25H23N5O2	O=C(NC1CCOCC1)C2=CC=C(C=C2)C3=NC=CC(=C3)C4=C[NH]N=C4C5=NC=CC=C5	21.0184	2.70927
IRAK-1-4 Inhibitor I	TLR	Immunology & Inflammation	IRAK-1-4 Inhibitor I is an inhibitor of <b>interleukin-1 receptor associated kinase (IRAK)</b> with IC50 values of 0.3 μM and 0.2 μM for IRAK-1 and IRAK-4, respectively. It displays IC50 values >10 µM in a panel of 27 other kinases tested.	395.41	509093-47-4	C20H21N5O4_x000D_	[O-][N+](=O)C1=CC=CC(=C1)C(=O)NC2=NC3=C(C=CC=C3)[N]2CCN4CCOCC4	9.23208	22.2889
MCP110	Ras	MAPK	MCP110 is an inhibitor of Ras/Raf-1 interaction. MCP110 disrupts the interaction of activated Ras with Raf and is potential for the treatment of human tumors.	508.65	521310-51-0	C33H36N2O3_x000D_	COC1=CC(=CC=C1OCC2=CC=CC=C2)CN(CCC3=NC=CC=C3)C(=O)CCCCC4=CC=CC=C4	58.505	7.30797
[truncated: 457 more rows]
